# Supplementary material for: Transcriptomic meta-analysis to identify potential antifungal targets in Candida albicans
Source: BMC Microbiol. 2024 Feb 27;24:66. doi: 10.1186/s12866-024-03213-8 (PMC10898158; doi:10.1186/s12866-024-03213-8)
Supplement: Supplementary file 1 — Supplementary Material 1. Additional Table .xlsx contains detailed samples information [file 12866_2024_3213_MOESM1_ESM.xlsx]

## Sheet: samples information
StudyID	ProjectID	SampleID	Information
study-5	GSE87832	SRR4415797	SC5314-Glucose
study-5	GSE87832	SRR4415798	SC5314-Glucose
study-5	GSE87832	SRR4415799	SC5314-Casamino acids
study-5	GSE87832	SRR4415800	SC5314-Casamino acids
study-5	GSE87832	SRR4415801	SC5314-Glutamate
study-5	GSE87832	SRR4415802	SC5314-Glutamate
study-5	GSE87832	SRR4415803	SC5314-a-Ketoglutarate
study-5	GSE87832	SRR4415804	SC5314-a-Ketoglutarate
study-7	GSE102039	SRR5882555	WT air-1
study-7	GSE102039	SRR5882556	WT air-2
study-7	GSE102039	SRR5882557	WT CO2-1
study-7	GSE102039	SRR5882558	WT CO2-2
study-7	GSE102039	SRR5882559	sfl2 air-1
study-7	GSE102039	SRR5882560	sfl2 air-2
study-7	GSE102039	SRR5882561	sfl2 CO2-1
study-7	GSE102039	SRR5882562	sfl2 CO2-2
study-8	GSE64659	SRR1740386	DU-24-2
study-8	GSE64659	SRR1740387	DU-24-3
study-8	GSE64659	SRR1740388	DU-24-4
study-8	GSE64659	SRR2062586	Du5hr-2
study-8	GSE64659	SRR2062587	Du5hr-3
study-8	GSE64659	SRR2062588	Du5hr-4
study-9	GSE99902	SRR5665827	YPD_solid_30_a
study-9	GSE99902	SRR5665828	YPD_solid_30_a
study-9	GSE99902	SRR5665829	YPD_solid_30_c
study-9	GSE99902	SRR5665830	YPD_solid_30_c
study-9	GSE99902	SRR5665831	YPD_solid_30_e
study-9	GSE99902	SRR5665832	YPD_solid_30_e
study-9	GSE99902	SRR5665833	Spider_solid_37_a
study-9	GSE99902	SRR5665834	Spider_solid_37_a
study-9	GSE99902	SRR5665835	Spider_solid_37_c
study-9	GSE99902	SRR5665836	Spider_solid_37_c
study-9	GSE99902	SRR5665837	Spider_solid_37_e
study-9	GSE99902	SRR5665838	Spider_solid_37_e
study-9	GSE99902	SRR5665839	FBS_solid_37_a
study-9	GSE99902	SRR5665840	FBS_solid_37_a
study-9	GSE99902	SRR5665841	FBS_solid_37_c
study-9	GSE99902	SRR5665842	FBS_solid_37_c
study-9	GSE99902	SRR5665843	FBS_solid_37_e
study-9	GSE99902	SRR5665844	FBS_solid_37_e
study-9	GSE99902	SRR5665845	Lees_solid_37_a
study-9	GSE99902	SRR5665846	Lees_solid_37_a
study-9	GSE99902	SRR5665847	Lees_solid_37_c
study-9	GSE99902	SRR5665848	Lees_solid_37_c
study-9	GSE99902	SRR5665849	Lees_solid_37_e
study-9	GSE99902	SRR5665850	Lees_solid_37_e
study-9	GSE99902	SRR5665851	RPMI_solid_37_a
study-9	GSE99902	SRR5665852	RPMI_solid_37_a
study-9	GSE99902	SRR5665853	RPMI_solid_37_c
study-9	GSE99902	SRR5665854	RPMI_solid_37_c
study-9	GSE99902	SRR5665855	RPMI_solid_37_e
study-9	GSE99902	SRR5665856	RPMI_solid_37_e
study-9	GSE99902	SRR5665857	YPD_liquid_30_a
study-9	GSE99902	SRR5665858	YPD_liquid_30_a
study-9	GSE99902	SRR5665859	YPD_liquid_30_c
study-9	GSE99902	SRR5665860	YPD_liquid_30_c
study-9	GSE99902	SRR5665861	YPD_liquid_30_e
study-9	GSE99902	SRR5665862	YPD_liquid_30_e
study-9	GSE99902	SRR5665863	Spider_liquid_37_a
study-9	GSE99902	SRR5665864	Spider_liquid_37_a
study-9	GSE99902	SRR5665865	Spider_liquid_37_c
study-9	GSE99902	SRR5665866	Spider_liquid_37_c
study-9	GSE99902	SRR5665867	Spider_liquid_37_e
study-9	GSE99902	SRR5665868	Spider_liquid_37_e
study-9	GSE99902	SRR5665869	FBS_liquid_37_a
study-9	GSE99902	SRR5665870	FBS_liquid_37_a
study-9	GSE99902	SRR5665871	FBS_liquid_37_c
study-9	GSE99902	SRR5665872	FBS_liquid_37_c
study-9	GSE99902	SRR5665873	FBS_liquid_37_e
study-9	GSE99902	SRR5665874	FBS_liquid_37_e
study-9	GSE99902	SRR5665875	Lees_liquid_37_a
study-9	GSE99902	SRR5665876	Lees_liquid_37_a
study-9	GSE99902	SRR5665877	Lees_liquid_37_c
study-9	GSE99902	SRR5665878	Lees_liquid_37_c
study-9	GSE99902	SRR5665879	Lees_liquid_37_e
study-9	GSE99902	SRR5665880	Lees_liquid_37_e
study-9	GSE99902	SRR5665881	RPMI_liquid_37_a
study-9	GSE99902	SRR5665882	RPMI_liquid_37_a
study-9	GSE99902	SRR5665883	RPMI_liquid_37_c
study-9	GSE99902	SRR5665884	RPMI_liquid_37_c
study-9	GSE99902	SRR5665885	RPMI_liquid_37_e
study-9	GSE99902	SRR5665886	RPMI_liquid_37_e
study-12	GSE73409	SRR2513862	wtu1_15099
study-12	GSE73409	SRR2513863	wtu2_15107
study-12	GSE73409	SRR2513864	wtu3_15111
study-12	GSE73409	SRR2513865	wtu4_12880
study-12	GSE73409	SRR2513866	wtu5_12881
study-12	GSE73409	SRR2513867	wtt1_15100
study-12	GSE73409	SRR2513868	wtt2_15108
study-12	GSE73409	SRR2513869	wtt3_15112
study-12	GSE73409	SRR2513870	wtt4_12884
study-12	GSE73409	SRR2513871	wtt5_12885
study-12	GSE73409	SRR2513872	hat1u1_15101
study-12	GSE73409	SRR2513873	hat1u2_15109
study-12	GSE73409	SRR2513874	hat1u3_15113
study-12	GSE73409	SRR2513875	hat1u4_12882
study-12	GSE73409	SRR2513876	hat1u5_12883
study-12	GSE73409	SRR2513877	hat1t1_15102
study-12	GSE73409	SRR2513878	hat1t2_15110
study-12	GSE73409	SRR2513879	hat1t3_15114
study-12	GSE73409	SRR2513880	hat1t4_12886
study-12	GSE73409	SRR2513881	hat1t5_12887
study-12	GSE73409	SRR2513882	cac2u1_15105
study-12	GSE73409	SRR2513883	cac2u2_15121
study-12	GSE73409	SRR2513884	cac2u3_15117
study-12	GSE73409	SRR2513885	cac2t1_15106
study-12	GSE73409	SRR2513886	cac2t2_15122
study-12	GSE73409	SRR2513887	cac2t3_15118
study-12	GSE73409	SRR2513888	rtt109u1_15103
study-12	GSE73409	SRR2513889	rtt109u2_15119
study-12	GSE73409	SRR2513890	rtt109u3_15115
study-12	GSE73409	SRR2513891	rtt109t1_15104
study-12	GSE73409	SRR2513892	rtt109t2_15120
study-12	GSE73409	SRR2513893	rtt109t3_15116
study-13	GSE99767	SRR5656024	Mig1_YPD_Acetic_1
study-13	GSE99767	SRR5656036	Mig1_YPD_Acetic_2
study-13	GSE99767	SRR5656048	Mig1_YPD_Acetic_3
study-13	GSE99767	SRR5656060	Mig1_YPD_Acetic_4
study-13	GSE99767	SRR5656023	Mig1_YPD_Butyric_1
study-13	GSE99767	SRR5656035	Mig1_YPD_Butyric_2
study-13	GSE99767	SRR5656047	Mig1_YPD_Butyric_3
study-13	GSE99767	SRR5656059	Mig1_YPD_Butyric_4
study-13	GSE99767	SRR5656022	Mig1_YPD_None_1
study-13	GSE99767	SRR5656034	Mig1_YPD_None_2
study-13	GSE99767	SRR5656046	Mig1_YPD_None_3
study-13	GSE99767	SRR5656058	Mig1_YPD_None_4
study-13	GSE99767	SRR5656027	Mig1_YPM_Acetic_1
study-13	GSE99767	SRR5656039	Mig1_YPM_Acetic_2
study-13	GSE99767	SRR5656051	Mig1_YPM_Acetic_3
study-13	GSE99767	SRR5656063	Mig1_YPM_Acetic_4
study-13	GSE99767	SRR5656026	Mig1_YPM_Butyric_1
study-13	GSE99767	SRR5656038	Mig1_YPM_Butyric_2
study-13	GSE99767	SRR5656050	Mig1_YPM_Butyric_3
study-13	GSE99767	SRR5656062	Mig1_YPM_Butyric_4
study-13	GSE99767	SRR5656025	Mig1_YPM_None_1
study-13	GSE99767	SRR5656037	Mig1_YPM_None_2
study-13	GSE99767	SRR5656049	Mig1_YPM_None_3
study-13	GSE99767	SRR5656061	Mig1_YPM_None_4
study-13	GSE99767	SRR5656018	SC5314_YPD_Acetic_1
study-13	GSE99767	SRR5656030	SC5314_YPD_Acetic_2
study-13	GSE99767	SRR5656042	SC5314_YPD_Acetic_3
study-13	GSE99767	SRR5656054	SC5314_YPD_Acetic_4
study-13	GSE99767	SRR5656017	SC5314_YPD_Butyric_1
study-13	GSE99767	SRR5656029	SC5314_YPD_Butyric_2
study-13	GSE99767	SRR5656041	SC5314_YPD_Butyric_3
study-13	GSE99767	SRR5656053	SC5314_YPD_Butyric_4
study-13	GSE99767	SRR5656016	SC5314_YPD_None_1
study-13	GSE99767	SRR5656028	SC5314_YPD_None_2
study-13	GSE99767	SRR5656040	SC5314_YPD_None_3
study-13	GSE99767	SRR5656052	SC5314_YPD_None_4
study-13	GSE99767	SRR5656021	SC5314_YPM_Acetic_1
study-13	GSE99767	SRR5656033	SC5314_YPM_Acetic_2
study-13	GSE99767	SRR5656045	SC5314_YPM_Acetic_3
study-13	GSE99767	SRR5656057	SC5314_YPM_Acetic_4
study-13	GSE99767	SRR5656020	SC5314_YPM_Butyric_1
study-13	GSE99767	SRR5656032	SC5314_YPM_Butyric_2
study-13	GSE99767	SRR5656044	SC5314_YPM_Butyric_3
study-13	GSE99767	SRR5656056	SC5314_YPM_Butyric_4
study-13	GSE99767	SRR5656019	SC5314_YPM_None_1
study-13	GSE99767	SRR5656031	SC5314_YPM_None_2
study-13	GSE99767	SRR5656043	SC5314_YPM_None_3
study-13	GSE99767	SRR5656055	SC5314_YPM_None_4
study-14	GSE49310	SRR944224	RYY006	Acetic acid (IC15)	T1 (4h)
study-14	GSE49310	SRR944237	RYY039	Acetic acid (IC15)	T1 (4h)
study-14	GSE49310	SRR944251	RYY070	Acetic acid (IC15)	T1 (4h)
study-14	GSE49310	SRR944259	RYY084	Acetic acid (IC15)	T1 (4h)
study-14	GSE49310	SRR1654854	RYY019	Acetic acid (IC15)	T2 (28h)
study-14	GSE49310	SRR1654860	RYY028	Acetic acid (IC15)	T2 (28h)
study-14	GSE49310	SRR1654882	RYY067	Acetic acid (IC15)	T2 (28h)
study-14	GSE49310	SRR1654884	RYY073	Acetic acid (IC15)	T2 (28h)
study-14	GSE49310	SRR1654847	RYY009	Acetic acid (IC15)	T3 (52h)
study-14	GSE49310	SRR1654865	RYY036	Acetic acid (IC15)	T3 (52h)
study-14	GSE49310	SRR1654880	RYY064	Acetic acid (IC15)	T3 (52h)
study-14	GSE49310	SRR1654891	RYY087	Acetic acid (IC15)	T3 (52h)
study-14	GSE49310	SRR944230	RYY025	Acetic acid (IC15)	T4 (76h)
study-14	GSE49310	SRR944246	RYY057	Acetic acid (IC15)	T4 (76h)
study-14	GSE49310	SRR944254	RYY076	Acetic acid (IC15)	T4 (76h)
study-14	GSE49310	SRR1654856	RYY021	Acetic acid (IC15)	T4 (76h)
study-14	GSE49310	SRR944222	RYY004	Butyric acid (IC50)	T1 (4h)
study-14	GSE49310	SRR944240	RYY045	Butyric acid (IC50)	T1 (4h)
study-14	GSE49310	SRR944252	RYY071	Butyric acid (IC50)	T1 (4h)
study-14	GSE49310	SRR944257	RYY080	Butyric acid (IC50)	T1 (4h)
study-14	GSE49310	SRR1654850	RYY015	Butyric acid (IC50)	T2 (28h)
study-14	GSE49310	SRR1654864	RYY034	Butyric acid (IC50)	T2 (28h)
study-14	GSE49310	SRR1654881	RYY066	Butyric acid (IC50)	T2 (28h)
study-14	GSE49310	SRR1654890	RYY085	Butyric acid (IC50)	T2 (28h)
study-14	GSE49310	SRR1654859	RYY024	Butyric acid (IC50)	T3 (52h)
study-14	GSE49310	SRR1654863	RYY032	Butyric acid (IC50)	T3 (52h)
study-14	GSE49310	SRR1654874	RYY054	Butyric acid (IC50)	T3 (52h)
study-14	GSE49310	SRR1654894	RYY093	Butyric acid (IC50)	T3 (52h)
study-14	GSE49310	SRR944225	RYY007	Butyric acid (IC50)	T4 (76h)
study-14	GSE49310	SRR944236	RYY037	Butyric acid (IC50)	T4 (76h)
study-14	GSE49310	SRR944243	RYY051	Butyric acid (IC50)	T4 (76h)
study-14	GSE49310	SRR944258	RYY082	Butyric acid (IC50)	T4 (76h)
study-14	GSE49310	SRR944228	RYY011	HCl pH control	T1 (4h)
study-14	GSE49310	SRR944241	RYY048	HCl pH control	T1 (4h)
study-14	GSE49310	SRR944245	RYY055	HCl pH control	T1 (4h)
study-14	GSE49310	SRR944255	RYY077	HCl pH control	T1 (4h)
study-14	GSE49310	SRR1654848	RYY013	HCl pH control	T2 (28h)
study-14	GSE49310	SRR1654867	RYY041	HCl pH control	T2 (28h)
study-14	GSE49310	SRR1654879	RYY062	HCl pH control	T2 (28h)
study-14	GSE49310	SRR1654893	RYY092	HCl pH control	T2 (28h)
study-14	GSE49310	SRR1654853	RYY018	HCl pH control	T3 (52h)
study-14	GSE49310	SRR1654861	RYY029	HCl pH control	T3 (52h)
study-14	GSE49310	SRR1654877	RYY059	HCl pH control	T3 (52h)
study-14	GSE49310	SRR1654896	RYY096	HCl pH control	T3 (52h)
study-14	GSE49310	SRR944220	RYY002	HCl pH control	T4 (76h)
study-14	GSE49310	SRR944239	RYY044	HCl pH control	T4 (76h)
study-14	GSE49310	SRR944242	RYY050	HCl pH control	T4 (76h)
study-14	GSE49310	SRR944261	RYY089	HCl pH control	T4 (76h)
study-14	GSE49310	SRR944226	RYY008	Lactic acid (IC50)	T1 (4h)
study-14	GSE49310	SRR944232	RYY027	Lactic acid (IC50)	T1 (4h)
study-14	GSE49310	SRR944247	RYY061	Lactic acid (IC50)	T1 (4h)
study-14	GSE49310	SRR944262	RYY090	Lactic acid (IC50)	T2 (28h)
study-14	GSE49310	SRR1654857	RYY022	Lactic acid (IC50)	T2 (28h)
study-14	GSE49310	SRR1654871	RYY047	Lactic acid (IC50)	T2 (28h)
study-14	GSE49310	SRR1654875	RYY056	Lactic acid (IC50)	T2 (28h)
study-14	GSE49310	SRR1654887	RYY078	Lactic acid (IC50)	T3 (52h)
study-14	GSE49310	SRR1654849	RYY014	Lactic acid (IC50)	T3 (52h)
study-14	GSE49310	SRR1654868	RYY042	Lactic acid (IC50)	T3 (52h)
study-14	GSE49310	SRR1654876	RYY058	Lactic acid (IC50)	T3 (52h)
study-14	GSE49310	SRR1654886	RYY075	Lactic acid (IC50)	T3 (52h)
study-14	GSE49310	SRR944223	RYY005	Lactic acid (IC50)	T4 (76h)
study-14	GSE49310	SRR944233	RYY030	Lactic acid (IC50)	T4 (76h)
study-14	GSE49310	SRR944250	RYY069	Lactic acid (IC50)	T4 (76h)
study-14	GSE49310	SRR1654895	RYY095	Lactic acid (IC50)	T4 (76h)
study-14	GSE49310	SRR944219	RYY001	None untreated control	T1 (4h)
study-14	GSE49310	SRR944234	RYY033	None untreated control	T1 (4h)
study-14	GSE49310	SRR944244	RYY052	None untreated control	T1 (4h)
study-14	GSE49310	SRR944263	RYY091	None untreated control	T1 (4h)
study-14	GSE49310	SRR1654852	RYY017	None untreated control	T2 (28h)
study-14	GSE49310	SRR1654870	RYY046	None untreated control	T2 (28h)
study-14	GSE49310	SRR1654878	RYY060	None untreated control	T2 (28h)
study-14	GSE49310	SRR1654892	RYY088	None untreated control	T2 (28h)
study-14	GSE49310	SRR1654851	RYY016	None untreated control	T3 (52h)
study-14	GSE49310	SRR1654869	RYY043	None untreated control	T3 (52h)
study-14	GSE49310	SRR1654872	RYY049	None untreated control	T3 (52h)
study-14	GSE49310	SRR1654888	RYY081	None untreated control	T3 (52h)
study-14	GSE49310	SRR944229	RYY012	None untreated control	T4 (76h)
study-14	GSE49310	SRR944238	RYY040	None untreated control	T4 (76h)
study-14	GSE49310	SRR944248	RYY063	None untreated control	T4 (76h)
study-14	GSE49310	SRR944264	RYY094	None untreated control	T4 (76h)
study-14	GSE49310	SRR944227	RYY010	Propionic acid (IC50)	T1 (4h)
study-14	GSE49310	SRR944231	RYY026	Propionic acid (IC50)	T1 (4h)
study-14	GSE49310	SRR944249	RYY065	Propionic acid (IC50)	T1 (4h)
study-14	GSE49310	SRR944260	RYY086	Propionic acid (IC50)	T1 (4h)
study-14	GSE49310	SRR1654858	RYY023	Propionic acid (IC50)	T2 (28h)
study-14	GSE49310	SRR1654862	RYY031	Propionic acid (IC50)	T2 (28h)
study-14	GSE49310	SRR1654873	RYY053	Propionic acid (IC50)	T2 (28h)
study-14	GSE49310	SRR1654889	RYY083	Propionic acid (IC50)	T2 (28h)
study-14	GSE49310	SRR1654855	RYY020	Propionic acid (IC50)	T3 (52h)
study-14	GSE49310	SRR1654866	RYY038	Propionic acid (IC50)	T3 (52h)
study-14	GSE49310	SRR1654883	RYY068	Propionic acid (IC50)	T3 (52h)
study-14	GSE49310	SRR1654885	RYY074	Propionic acid (IC50)	T3 (52h)
study-14	GSE49310	SRR944221	RYY003	Propionic acid (IC50)	T4 (76h)
study-14	GSE49310	SRR944235	RYY035	Propionic acid (IC50)	T4 (76h)
study-14	GSE49310	SRR944253	RYY072	Propionic acid (IC50)	T4 (76h)
study-14	GSE49310	SRR944256	RYY079	Propionic acid (IC50)	T4 (76h)
