# Supplementary material for: Transcriptomic meta-analysis to identify potential antifungal targets in Candida albicans
Source: BMC Microbiol. 2024 Feb 27;24:66. doi: 10.1186/s12866-024-03213-8 (PMC10898158; doi:10.1186/s12866-024-03213-8)
Supplement: Supplementary file 2 — Supplementary Material 2. Additional Table .xlsx contains DESeq2 detailed results [file 12866_2024_3213_MOESM2_ESM.xlsx]

## Sheet: cluster target genes
Central Metabolism						Ion homeostasis						Pathogenicity
UP		DOWN		Gene Description		UP		DOWN		Gene Description		UP		DOWN		Gene Description
Gene	Frequency	Gene	Frequency			Gene	Frequency	Gene	Frequency			Gene	Frequency	Gene	Frequency
TPS2	4	TPS2	4			RIM21	4	RIM21	4	pH-response regulator protein		CPH1	4	CPH1	4
				Glyco_transf_20 domain-containing protein		PRA1	4	PRA1	4			CNB1	4	CNB1	4
TPS1	3	TPS1	3	Alpha,alpha-trehalose-phosphate synthase						pH-regulated antigen PRA1		ROB1	4	ROB1	4
CGR1	3	CGR1	3			RIM9	3	RIM9	3			SAP4	4	SAP4	4	Candidapepsin-4
DAC1	3	DAC1	3							pH-response regulator protein		SAP6	4	SAP6	4	Candidapepsin-6
NGS1	3	NGS1	3			MID1	4	MID1	4	Mid1p		SAP5	3	SAP5	3	Candidapepsin-5
NGT1	3	NGT1	3			VMA2	3	VMA2	3			SAP9	3	SAP9	3	Candidapepsin-9
ATC1	2	ATC1	2			DFG16	3	DFG16	3			SAP10	3	SAP10	3	Candidapepsin-10
GLK1	2	GLK1	2			CCH1	3	CCH1	3	EF-hand domain-containing protein		ERG11	3	ERG11	3
GLK4	2	GLK4	2			SPF1	3	SPF1	3			INT1	3	INT1	3
FBA1	2	FBA1	2			ZRT1	3	ZRT1	3	Putative zinc transporter; acts with Pra1 in sequestration of zinc from host tissues during infection.		PMT1	3	PMT1	3
GPD2	2	GPD2	2			CSR1	3	CSR1	3	Transcription factor; role in zinc homeostasis		EFG1	3	EFG1	3
RHR2	2	RHR2	2			VMA5	2	VMA5	2			HGC1	3	PHR1	3
HEX1	2	HEX1	2			FET99	2	AFT2	2			NDT80	3	NDT80	3
ICL1	2	ICL1	2			FET34	2	MAC1	2			PHR1	3	MNT1	2
MLS1	2	MLS1	2			MAC1	2	FET99	2			MNT1	2	ERG3	2
PCK1	2	PCK1	2			AFT2	2	FET34	2			ERG3	2	HGC1	2
POX1	2	POX1	2			RIM101	2	RIM101	2			UME6	2	UME6	2
HXK2	1	HXK2	1			PMA1	1	PMA1	1			TEC1	2	TEC1	2
GCY1	1	GCY1	1			CFL1	1	CFL1	1			BRG1	2	BRG1	2
GPD1	1	GPD1	1									XOG1	2	XOG1	2
DAK2	1	DAK2	1									ALS3	1	BCR1	1
DOG1	1	DOG1	1									BCR1	1	WOR1	1
SOL3	1	SOL3	1									WOR1	1	ALS3	1
TKL1	1	TKL1	1									HWP1	1	HWP1	1
												ALS1	1	ALS1	1
												HYR1	1	HYR1	1
