# Supplementary material for: Transcriptomic meta-analysis to identify potential antifungal targets in Candida albicans
Source: BMC Microbiol. 2024 Feb 27;24:66. doi: 10.1186/s12866-024-03213-8 (PMC10898158; doi:10.1186/s12866-024-03213-8)
Supplement: Supplementary file 3 — Supplementary Material 3. Additional Table .xlsx contains the complete target gene lists and their frequency in the selected GO clusters [file 12866_2024_3213_MOESM3_ESM.xlsx]

## Sheet: DESeq2 Comparisons
No.	Accession number	DESeq2 comparisons	Reference	Notes
5	GSE87832	alpha-Ketoglutarate_vs_Glucose	(Danhof et al., 2016)	C. albicans strain SC5314 was subjected to incubation in minimal YNB media supplemented with various substrates including glucose, casamino acids, glutamate, and a-ketoglutarate for a duration of five hours.
		Casamino_acid_vs_Glucose
		Glutamate_vs_Glucose
7	GSE102039	sfl2_air_vs_wt_air	(Tao et al., 2017)	This study involved profiling the total RNA of both WT and sfl2/sfl2 strains of C. albicans grown under air or in a 5% CO2 environment for a span of 22 hours.
		wt_CO2_vs_wt_air
		sfl2_CO2_vs_wt_CO2
		sfl2_CO2_vs_sfl2_air
8	GSE64659	GlcNAc-24h_vs_GlcNAc-5h	(Du et al., 2015)	Cells of C. albicans SC5314 were exposed to various substrates such as GlcNAc, sorbitol, and glucose for 5 or 24 hours
9	GSE99902	FBS_liquid_vs_solid	(Azadmanesh et al., 2017)
		Lees_liquid_vs_solid
		RMPI_liquid_vs_solid
		YPD_liquid_vs_solid
		Spider_liquid_vs_solid
12	GSE73409	rtt109 treated_vs_rtt109 untreated	(Tscherner et al., 2015)	Transcriptome analysis of wild type, Hat1-deficient, Cac2-deficient and Rtt109-deficient Candida albicans cells prior to and after treatment with hydrogen peroxide
		cac2 treated_vs_cac2 untreated
		hat1 treated_vs_hat1 untreated
		rtt109 treated_vs_wt treated
		cac2 treated_vs_wt treated
		hat1 treated_vs_wt treated
		rtt109u_vs_wt untreated
		cac2u_vs_wt untreated
		hat1u_vs_wt untreated
		wt treated_vs_wt untreated
13	GSE99767	Mig1_YPD_Acetic_vs_Mig1_YPD_None	(Cottier et al., 2017)	An intricate matrix of factors was explored in this study, involving two strains (SC5314 and mig1), two media types (YPD and YPM), three different conditions (no acids, acetic acid, butyric acid), and four replicates
		Mig1_YPD_Acetic_vs_wt_YPD_Acetic
		Mig1_YPD_Butyric_vs_Mig1_YPD_None
		Mig1_YPD_Butyric_vs_wt_YPD_Butyric
		Mig1_YPD_None_vs_wt_YPD_None
		Mig1_YPM_Acetic_vs_Mig1_YPM_None
		Mig1_YPM_Acetic_vs_wt_YPM_Acetic
		Mig1_YPM_Butyric_vs_Mig1_YPM_None
		Mig1_YPM_Butyric_vs_wt_YPM_Butyric
		Mig1_YPM_None_vs_wt_YPM_None
		wt_YPD_Acetic_vs_wt_YPD_None
		wt_YPD_Butyric_vs_wt_YPD_None
		wt_YPM_Acetic_vs_wt_YPM_None
		wt_YPM_Butyric_vs_wt_YPM_None
14	GSE49310	Acetic acid_15_T1_vs_CK_T1	(Cottier et al., 2015)	This study's comprehensive approach involved the transcriptional profiling of wild-type C. albicans SC5314 under six distinct conditions, encompassing both control and weak acid environments. With a robust design involving multiple time points and replicates
		Acetic acid_15_T2_vs_CK_T2		pH	5.5, 5.8
		Acetic acid_15_T3_vs_CK_T3		Replicate	D, C, B, F
		Acetic acid_15_T4_vs_CK_T4		Time	T1 (4h), T3 (52h), T4 (76h), T2 (28h)
		Butyric acid_T1_vs_CK_T1		Treatment	Acetic acid (IC15), Butyric acid (IC50), Propionic acid (IC50), Lactic acid (IC50), None, HCl
		Butyric acid_T2_vs_CK_T2
		Butyric acid_T3_vs_CK_T3
		Butyric acid_T4_vs_CK_T4
		HCl_T1_vs_CK_T1
		HCl_T2_vs_CK_T2
		HCl_T3_vs_CK_T3
		HCl_T4_vs_CK_T4
		Lactic acid_T1_vs_CK_T1
		Lactic acid_T2_vs_CK_T2
		Lactic acid_T3_vs_CK_T3
		Lactic acid_T4_vs_CK_T4
		Propionic acid_T1_vs_CK_T1
		Propionic acid_T2_vs_CK_T2
		Propionic acid_T3_vs_CK_T3
		Propionic acid_T4_vs_CK_T4

## Sheet: number of DE genes_GO ID
Study	# Differentially expressed genes	# Up_regulated	# Down_regulated	# Significantly enriched GO terms
study5_a-Ketoglutarate_vs_Glu	1363	862	501	70
study5_Casamino_acid_vs_Glu	1413	843	570	97
study5_Glutamate_vs_Glu	1495	960	535	73
study7_sfl2_air_vs_wt_air	518	336	182	0
study7_wt_CO2_vs_wt_air	117	29	88	4
study7_sfl2_CO2_vs_wt_CO2	767	510	257	27
study7_sfl2_CO2_vs_sfl2_air	6	3	3	0
study8_GlcNAc-24h_vs_GlcNAc-5h	711	340	371	243
study9_FBS_liquid_vs_solid	699	337	362	195
study9_Lees_liquid_vs_solid	1474	793	681	232
study9_RMPI_liquid_vs_solid	594	244	350	93
study9_YPD_liquid_vs_solid	164	49	115	14
study9_Spider_liquid_vs_solid	256	213	43	46
study12_rtt109t_vs_rtt109u	1331	691	640	333
study12_cac2t_vs_cac2u	1845	941	904	352
study12_hat1t_vs_hat1u	1412	728	684	326
study12_rtt109t_vs_wtt	1201	711	490	131
study12_cac2t_vs_wtt	951	655	296	159
study12_hat1t_vs_wtt	1406	988	418	127
study12_rtt109u_vs_wtu	375	330	45	23
study12_cac2u_vs_wtu	527	507	20	9
study12_hat1u_vs_wtu	1037	800	237	96
study12_wtt_vs_wtu	3061	1561	1500	357
study13_Mig1_YPD_Acetic_vs_Mig1_YPD_None	2229	1301	928	193
study13_Mig1_YPD_Acetic_vs_wt_YPD_Acetic	1254	874	380	83
study13_Mig1_YPD_Butyric_vs_Mig1_YPD_None	1066	628	438	70
study13_Mig1_YPD_Butyric_vs_wt_YPD_Butyric	117	105	12	7
study13_Mig1_YPD_None_vs_wt_YPD_None	178	127	51	4
study13_Mig1_YPM_Acetic_vs_Mig1_YPM_None	2481	1428	1053	228
study13_Mig1_YPM_Acetic_vs_wt_YPM_Acetic	398	350	48	31
study13_Mig1_YPM_Butyric_vs_Mig1_YPM_None	2107	1099	1008	152
study13_Mig1_YPM_Butyric_vs_wt_YPM_Butyric	28	14	14	3
study13_Mig1_YPM_None_vs_wt_YPM_None	87	56	31	0
study13_wt_YPD_Acetic_vs_wt_YPD_None	1385	815	570	347
study13_wt_YPD_Butyric_vs_wt_YPD_None	974	584	390	308
study13_wt_YPM_Acetic_vs_wt_YPM_None	2640	1409	1231	189
study13_wt_YPM_Butyric_vs_wt_YPM_None	2636	1404	1232	193
study14_Acetic acid_15_T1_vs_CK_T1	0	0	0	0
study14_Acetic acid_15_T2_vs_CK_T2	0	0	0	0
study14_Acetic acid_15_T3_vs_CK_T3	155	3	152	15
study14_Acetic acid_15_T4_vs_CK_T4	0	0	0	0
study14_Butyric acid_50_T1_vs_CK_T1	0	0	0	0
study14_Butyric acid_50_T2_vs_CK_T2	0	0	0	0
study14_Butyric acid_50_T3_vs_CK_T3	1644	578	1066	177
study14_Butyric acid_50_T4_vs_CK_T4	0	0	0	0
study14_HCl_T1_vs_CK_T1	0	0	0	0
study14_HCl_T2_vs_CK_T2	381	363	18	7
study14_HCl_T3_vs_CK_T3	97	6	91	39
study14_HCl_T4_vs_CK_T4	0	0	0	0
study14_Lactic acid_50_T1_vs_CK_T1	106	106	0	0
study14_Lactic acid_50_T2_vs_CK_T2	0	0	0	0
study14_Lactic acid_50_T3_vs_CK_T3	52	2	50	15
study14_Lactic acid_50_T4_vs_CK_T4	0	0	0	0
study14_Propionic acid_50_T1_vs_CK_T1	3	3	0	1
study14_Propionic acid_50_T2_vs_CK_T2	0	0	0	0
study14_Propionic acid_50_T3_vs_CK_T3	22	3	19	0
study14_Propionic acid_50_T4_vs_CK_T4	0	0	0	0

## Sheet: AllData
	gene	baseMean	log2FoldChange	lfcSE	stat	pvalue	padj	Study
1	C6_04180W_A	1949.74	1.70367	0.192274	8.86061	7.95806e-19	2.44989e-17	study5_a-Ketoglutarate_vs_Glu
2	C5_03480C_A	849.106	-1.80967	0.264771	-6.83487	8.20815e-12	1.20328e-10	study5_a-Ketoglutarate_vs_Glu
3	CR_01470W_A	18796.6	1.94584	0.246746	7.88603	3.11945e-15	6.5328e-14	study5_a-Ketoglutarate_vs_Glu
4	CR_01630C_A	329.238	2.10805	0.473806	4.44919	8.61957e-06	5.0304e-05	study5_a-Ketoglutarate_vs_Glu
5	CR_00300W_A	122.347	4.02203	0.493132	8.15609	3.46046e-16	8.13208e-15	study5_a-Ketoglutarate_vs_Glu
6	C1_12180C_A	1849.55	-1.01123	0.159712	-6.33159	2.42653e-10	3.00606e-09	study5_a-Ketoglutarate_vs_Glu
7	C6_02210W_A	167.716	-2.79122	0.319624	-8.73281	2.48422e-18	7.24896e-17	study5_a-Ketoglutarate_vs_Glu
8	C1_01990W_A	81.24	1.55907	0.579343	2.69111	0.00712156	0.0190226	study5_a-Ketoglutarate_vs_Glu
9	C2_01420C_A	816.299	-1.43043	0.259079	-5.52119	3.36718e-08	3.05777e-07	study5_a-Ketoglutarate_vs_Glu
10	C6_03030W_A	79.8468	-1.96681	0.489352	-4.0192	5.83951e-05	0.000283101	study5_a-Ketoglutarate_vs_Glu
11	C1_05850W_A	2213.67	-1.34063	0.314538	-4.26221	2.02416e-05	0.000109035	study5_a-Ketoglutarate_vs_Glu
12	C2_05160C_A	1783.95	1.34612	0.350983	3.83528	0.00012542	0.00056079	study5_a-Ketoglutarate_vs_Glu
13	C2_09120C_A	90.6746	1.03612	0.379116	2.733	0.00627601	0.0170602	study5_a-Ketoglutarate_vs_Glu
14	C2_03080W_A	10726.4	1.87449	0.313941	5.97084	2.36033e-09	2.54957e-08	study5_a-Ketoglutarate_vs_Glu
15	C4_00440C_A	955.895	-2.49208	0.352482	-7.07009	1.54829e-12	2.45692e-11	study5_a-Ketoglutarate_vs_Glu
16	C1_00100C_A	737.308	-1.36617	0.281539	-4.85249	1.21919e-06	8.50117e-06	study5_a-Ketoglutarate_vs_Glu
17	CR_00610W_A	704.35	2.00786	0.25141	7.9864	1.38937e-15	3.03345e-14	study5_a-Ketoglutarate_vs_Glu
18	CR_08870W_A	2570.77	1.00884	0.164867	6.11908	9.41172e-10	1.07113e-08	study5_a-Ketoglutarate_vs_Glu
19	CR_00930W_A	3865.76	6.61284	0.600954	11.0039	3.65902e-28	2.19492e-26	study5_a-Ketoglutarate_vs_Glu
20	CM_00230W	4.92886	-6.02643	1.79085	-3.36512	0.000765113	0.00277432	study5_a-Ketoglutarate_vs_Glu
21	C5_00540C_A	722.277	10.2597	1.50159	6.83258	8.34032e-12	1.21975e-10	study5_a-Ketoglutarate_vs_Glu
22	CR_10140W_A	8547.83	2.50287	0.240042	10.4268	1.87029e-25	9.13916e-24	study5_a-Ketoglutarate_vs_Glu
23	C2_10280C_A	9776.81	1.08369	0.209514	5.17241	2.3109e-07	1.83827e-06	study5_a-Ketoglutarate_vs_Glu
24	CR_09570W_A	845.507	1.53728	0.268849	5.71799	1.07789e-08	1.05009e-07	study5_a-Ketoglutarate_vs_Glu
25	C4_07150W_A	172.842	-1.35923	0.448731	-3.02905	0.00245323	0.00764787	study5_a-Ketoglutarate_vs_Glu
26	C7_01070C_A	3443.31	1.11238	0.233399	4.76602	1.879e-06	1.25887e-05	study5_a-Ketoglutarate_vs_Glu
27	CR_06660W_A	3591.47	3.09394	0.342888	9.02319	1.82695e-19	5.95162e-18	study5_a-Ketoglutarate_vs_Glu
28	C2_08650W_A	3865.76	1.546	0.18804	8.22168	2.00677e-16	4.91873e-15	study5_a-Ketoglutarate_vs_Glu
29	C1_03940W_A	7444.33	2.23726	0.208462	10.7322	7.18425e-27	3.94941e-25	study5_a-Ketoglutarate_vs_Glu
30	CR_05730C_A	3867.2	1.76172	0.365518	4.81979	1.43707e-06	9.84208e-06	study5_a-Ketoglutarate_vs_Glu
31	C1_01440C_A	150.87	2.46968	0.359537	6.86905	6.46286e-12	9.56535e-11	study5_a-Ketoglutarate_vs_Glu
32	C1_07980C_A	1688.98	2.04263	0.401671	5.08534	3.66966e-07	2.82426e-06	study5_a-Ketoglutarate_vs_Glu
33	C7_04180W_A	2588.97	2.03837	0.226863	8.98502	2.58684e-19	8.16778e-18	study5_a-Ketoglutarate_vs_Glu
34	C1_05060W_A	1286.55	1.23463	0.398061	3.10162	0.00192462	0.00622367	study5_a-Ketoglutarate_vs_Glu
35	C2_00340C_A	11536.9	-1.59474	0.277905	-5.73843	9.55558e-09	9.36842e-08	study5_a-Ketoglutarate_vs_Glu
36	C2_04170C_A	6752.59	1.23906	0.18669	6.63698	3.20186e-11	4.34225e-10	study5_a-Ketoglutarate_vs_Glu
37	C1_05080W_A	225.714	1.21059	0.3823	3.16659	0.00154238	0.00514265	study5_a-Ketoglutarate_vs_Glu
38	CR_01930C_A	4624.36	-5.60876	0.181715	-30.8656	3.45743e-209	5.32185e-206	study5_a-Ketoglutarate_vs_Glu
39	C2_01750C_A	5478.19	2.2962	0.270873	8.47705	2.30972e-17	6.21003e-16	study5_a-Ketoglutarate_vs_Glu
40	CR_08060C_A	2750.08	-1.08647	0.202431	-5.3671	8.00127e-08	6.84219e-07	study5_a-Ketoglutarate_vs_Glu
41	C2_01890W_A	1458.17	1.84206	0.354121	5.20178	1.97394e-07	1.5887e-06	study5_a-Ketoglutarate_vs_Glu
42	C3_07760C_A	393.12	1.40247	0.268496	5.22344	1.75631e-07	1.43607e-06	study5_a-Ketoglutarate_vs_Glu
43	C2_01970C_A	1136.88	-2.51779	0.317435	-7.93166	2.16228e-15	4.62262e-14	study5_a-Ketoglutarate_vs_Glu
44	C2_06940C_A	1060.97	-1.86613	0.187709	-9.94162	2.7432e-23	1.13355e-21	study5_a-Ketoglutarate_vs_Glu
45	C2_09630C_A	135.89	-2.83443	0.314901	-9.00103	2.23619e-19	7.13379e-18	study5_a-Ketoglutarate_vs_Glu
46	C7_01130C_A	190.376	1.54372	0.388671	3.97179	7.1334e-05	0.000337589	study5_a-Ketoglutarate_vs_Glu
47	C7_01510W_A	6052.83	4.42029	0.375602	11.7685	5.66958e-32	3.96677e-30	study5_a-Ketoglutarate_vs_Glu
48	C1_13550C_A	1666.15	1.02729	0.221677	4.63418	3.58349e-06	2.28165e-05	study5_a-Ketoglutarate_vs_Glu
49	CR_01300W_A	2549.76	1.67835	0.241777	6.94172	3.87368e-12	5.99252e-11	study5_a-Ketoglutarate_vs_Glu
50	C5_00640C_A	2158.73	1.71094	0.21165	8.0838	6.27808e-16	1.43164e-14	study5_a-Ketoglutarate_vs_Glu
51	C2_03110W_A	311.496	-2.99762	0.391729	-7.65227	1.97465e-14	3.88432e-13	study5_a-Ketoglutarate_vs_Glu
52	C1_02810W_A	1574.37	-1.72514	0.208506	-8.27383	1.29728e-16	3.2735e-15	study5_a-Ketoglutarate_vs_Glu
53	C2_02600C_A	186.904	2.60844	0.315571	8.2658	1.38763e-16	3.4679e-15	study5_a-Ketoglutarate_vs_Glu
54	C3_07070C_A	2112.74	3.42014	0.32628	10.4822	1.04253e-25	5.21858e-24	study5_a-Ketoglutarate_vs_Glu
55	C2_02540W_A	2570.66	1.02545	0.423214	2.42301	0.0153926	0.0366482	study5_a-Ketoglutarate_vs_Glu
56	CR_04590C_A	7918.26	-1.26325	0.332652	-3.7975	0.000146165	0.000639159	study5_a-Ketoglutarate_vs_Glu
57	C3_00430W_A	85.4787	-1.15516	0.318178	-3.63055	0.000282821	0.0011532	study5_a-Ketoglutarate_vs_Glu
58	C3_03710W_A	1070.08	1.98887	0.26278	7.56856	3.77397e-14	7.10591e-13	study5_a-Ketoglutarate_vs_Glu
59	C3_04080W_A	9066.42	1.98639	0.242709	8.18428	2.73944e-16	6.6144e-15	study5_a-Ketoglutarate_vs_Glu
60	CR_10380C_A	1479.83	-1.24534	0.291785	-4.268	1.9723e-05	0.000106428	study5_a-Ketoglutarate_vs_Glu
61	C1_04460C_A	1242.07	1.1384	0.354245	3.2136	0.00131083	0.00444425	study5_a-Ketoglutarate_vs_Glu
62	C6_01050W_A	1376.86	1.01961	0.246634	4.13409	3.56362e-05	0.000182387	study5_a-Ketoglutarate_vs_Glu
63	C1_12570C_A	1767.96	1.33519	0.178349	7.48637	7.08037e-14	1.29744e-12	study5_a-Ketoglutarate_vs_Glu
64	C1_10360C_A	5448.34	-1.92663	0.282175	-6.82779	8.62329e-12	1.25399e-10	study5_a-Ketoglutarate_vs_Glu
65	C1_02270C_A	2295.02	2.26076	0.208176	10.8598	1.79065e-27	1.03037e-25	study5_a-Ketoglutarate_vs_Glu
66	C5_02890W_A	10433.9	1.66427	0.244584	6.8045	1.01401e-11	1.46212e-10	study5_a-Ketoglutarate_vs_Glu
67	C1_12020W_A	12.0129	2.24823	0.759363	2.96067	0.00306966	0.00925106	study5_a-Ketoglutarate_vs_Glu
68	C2_05460W_A	111914	-4.1979	0.276476	-15.1836	4.54026e-52	6.21208e-50	study5_a-Ketoglutarate_vs_Glu
69	C7_01100C_A	637.398	-1.47372	0.339913	-4.33556	1.45388e-05	8.16e-05	study5_a-Ketoglutarate_vs_Glu
70	C1_10030W_A	1520.51	1.56423	0.379335	4.12361	3.72986e-05	0.000189634	study5_a-Ketoglutarate_vs_Glu
71	C4_03990C_A	270.865	-1.18082	0.357743	-3.30074	0.000964307	0.00339271	study5_a-Ketoglutarate_vs_Glu
72	CR_01860W_A	56.5299	-1.45991	0.535703	-2.72523	0.00642575	0.0174211	study5_a-Ketoglutarate_vs_Glu
73	C3_07180C_A	1493.05	1.37576	0.301264	4.56662	4.95653e-06	3.05173e-05	study5_a-Ketoglutarate_vs_Glu
74	C2_05250C_A	18756.6	2.52655	0.347946	7.26131	3.83348e-13	6.59295e-12	study5_a-Ketoglutarate_vs_Glu
75	CR_06640C_A	3558.98	1.43939	0.174597	8.24405	1.66473e-16	4.0999e-15	study5_a-Ketoglutarate_vs_Glu
76	C1_13470W_A	1065.91	1.63079	0.226966	7.18518	6.71178e-13	1.11688e-11	study5_a-Ketoglutarate_vs_Glu
77	C7_01750W_A	542.838	2.01919	0.252406	7.99974	1.24681e-15	2.74164e-14	study5_a-Ketoglutarate_vs_Glu
78	CR_05940W_A	45.8652	1.0602	0.43269	2.45025	0.0142757	0.0343879	study5_a-Ketoglutarate_vs_Glu
79	C2_08700C_A	1587.97	1.12795	0.204856	5.50609	3.6689e-08	3.29772e-07	study5_a-Ketoglutarate_vs_Glu
80	C6_01720C_A	8307.91	1.69545	0.220927	7.67423	1.66422e-14	3.31604e-13	study5_a-Ketoglutarate_vs_Glu
81	C6_00250W_A	2820.89	1.11927	0.224741	4.98025	6.35009e-07	4.69135e-06	study5_a-Ketoglutarate_vs_Glu
82	C2_09080C_A	4.0441	4.46365	1.82435	2.44671	0.0144166	0.0346866	study5_a-Ketoglutarate_vs_Glu
83	C5_05240C_A	44.4325	1.76048	0.478435	3.67966	0.000233548	0.000968971	study5_a-Ketoglutarate_vs_Glu
84	C4_02200C_A	595.904	1.37682	0.248241	5.54631	2.91769e-08	2.66532e-07	study5_a-Ketoglutarate_vs_Glu
85	CR_04540C_A	511.366	1.16744	0.26119	4.46971	7.83272e-06	4.62822e-05	study5_a-Ketoglutarate_vs_Glu
86	C2_00480C_A	1212.6	1.76297	0.452917	3.89247	9.92288e-05	0.000452222	study5_a-Ketoglutarate_vs_Glu
87	C1_04360C_A	9352.98	1.65448	0.265384	6.23429	4.53842e-10	5.43639e-09	study5_a-Ketoglutarate_vs_Glu
88	C1_00020C_A	1405.98	-1.34645	0.225375	-5.97426	2.31138e-09	2.50108e-08	study5_a-Ketoglutarate_vs_Glu
89	C1_05930C_A	2450.4	1.49683	0.33026	4.53228	5.83506e-06	3.55005e-05	study5_a-Ketoglutarate_vs_Glu
90	C2_02550C_A	159.191	-1.66851	0.420969	-3.9635	7.38578e-05	0.000347928	study5_a-Ketoglutarate_vs_Glu
91	C3_00920W_A	5518.34	10.1891	0.51953	19.6121	1.21995e-85	3.95328e-83	study5_a-Ketoglutarate_vs_Glu
92	C2_08340C_A	103.781	3.50806	0.470033	7.46344	8.42933e-14	1.53096e-12	study5_a-Ketoglutarate_vs_Glu
93	C2_09060C_A	13714.1	-1.25399	0.257669	-4.86665	1.13504e-06	7.95043e-06	study5_a-Ketoglutarate_vs_Glu
94	C5_03330C_A	1465.31	1.30973	0.161568	8.10638	5.21521e-16	1.19814e-14	study5_a-Ketoglutarate_vs_Glu
95	C4_03960W_A	1396.12	-1.24003	0.458681	-2.70347	0.00686205	0.0184175	study5_a-Ketoglutarate_vs_Glu
96	C1_10140C_A	1694.79	1.83737	0.297806	6.1697	6.84192e-10	7.94825e-09	study5_a-Ketoglutarate_vs_Glu
97	C1_13250W_A	1761.9	1.75167	0.243468	7.19468	6.26077e-13	1.05034e-11	study5_a-Ketoglutarate_vs_Glu
98	C4_05790W_A	1299.52	-1.09772	0.248995	-4.4086	1.04041e-05	5.96998e-05	study5_a-Ketoglutarate_vs_Glu
99	C4_06390W_A	1442.46	1.01461	0.358336	2.83144	0.00463385	0.0131296	study5_a-Ketoglutarate_vs_Glu
100	C3_03870C_A	3711.65	1.16011	0.257207	4.51042	6.46979e-06	3.91302e-05	study5_a-Ketoglutarate_vs_Glu
101	C3_07700W_A	878.161	-1.17678	0.225906	-5.20913	1.89724e-07	1.53298e-06	study5_a-Ketoglutarate_vs_Glu
102	C2_09640W_A	5039.3	-1.5669	0.191875	-8.16625	3.18125e-16	7.53345e-15	study5_a-Ketoglutarate_vs_Glu
103	C4_00130W_A	35511.8	2.25483	0.305334	7.38479	1.52693e-13	2.70153e-12	study5_a-Ketoglutarate_vs_Glu
104	C6_02830W_A	185.645	-1.14034	0.282693	-4.03385	5.487e-05	0.000267698	study5_a-Ketoglutarate_vs_Glu
105	C3_04900W_A	2084.57	1.13327	0.355684	3.18616	0.00144173	0.00483219	study5_a-Ketoglutarate_vs_Glu
106	C4_06540W_A	4646.94	2.29558	0.207427	11.0669	1.81521e-28	1.14043e-26	study5_a-Ketoglutarate_vs_Glu
107	CR_09140C_A	4902.3	1.84967	0.401024	4.61237	3.981e-06	2.49603e-05	study5_a-Ketoglutarate_vs_Glu
108	C1_14590C_A	1356.64	-1.36656	0.244406	-5.59134	2.25328e-08	2.09886e-07	study5_a-Ketoglutarate_vs_Glu
109	C1_11200W_A	14996.5	1.00365	0.337765	2.97145	0.00296399	0.00900311	study5_a-Ketoglutarate_vs_Glu
110	C4_00380W_A	1009.55	-1.18122	0.247566	-4.77133	1.83014e-06	1.22881e-05	study5_a-Ketoglutarate_vs_Glu
111	C1_12590W_A	3417.64	1.04389	0.18973	5.50194	3.7563e-08	3.37137e-07	study5_a-Ketoglutarate_vs_Glu
112	CR_02750C_A	236.288	3.0255	0.440259	6.87209	6.32695e-12	9.40943e-11	study5_a-Ketoglutarate_vs_Glu
113	C3_04190W_A	98.4931	-1.11652	0.4401	-2.53696	0.0111818	0.0279296	study5_a-Ketoglutarate_vs_Glu
114	CR_06490C_A	13583.2	1.17261	0.37206	3.15167	0.00162341	0.00537384	study5_a-Ketoglutarate_vs_Glu
115	C2_03470C_A	16716.8	1.0591	0.245509	4.31389	1.6041e-05	8.86577e-05	study5_a-Ketoglutarate_vs_Glu
116	C6_00070C_A	2640.59	1.90978	0.27725	6.88829	5.64655e-12	8.47947e-11	study5_a-Ketoglutarate_vs_Glu
117	C7_01900W_A	6322.28	2.05339	0.233248	8.80346	1.32667e-18	3.94605e-17	study5_a-Ketoglutarate_vs_Glu
118	C2_06070W_A	2691.92	1.56785	0.221681	7.07257	1.52094e-12	2.4257e-11	study5_a-Ketoglutarate_vs_Glu
119	C3_02850C_A	496.418	-1.05249	0.252678	-4.16535	3.1087e-05	0.000161114	study5_a-Ketoglutarate_vs_Glu
120	C3_01930W_A	8358.94	6.55155	0.301495	21.7302	1.06251e-104	5.45154e-102	study5_a-Ketoglutarate_vs_Glu
121	C3_05650W_A	7214.94	1.0459	0.302254	3.46033	0.000539516	0.00203916	study5_a-Ketoglutarate_vs_Glu
122	CR_02710W_A	739.847	1.09098	0.352619	3.09393	0.00197525	0.00635404	study5_a-Ketoglutarate_vs_Glu
123	C2_00400C_A	5699.69	2.11677	0.222613	9.50878	1.92915e-21	6.94608e-20	study5_a-Ketoglutarate_vs_Glu
124	CR_04530W_A	3604.17	2.00312	0.248519	8.06025	7.61384e-16	1.71716e-14	study5_a-Ketoglutarate_vs_Glu
125	C1_00270W_A	78.2648	-1.31429	0.499832	-2.62947	0.00855185	0.0222355	study5_a-Ketoglutarate_vs_Glu
126	C4_01300W_A	10013.4	2.07851	0.24007	8.65794	4.8038e-18	1.37567e-16	study5_a-Ketoglutarate_vs_Glu
127	C7_01200C_A	1472.81	1.32768	0.380662	3.48781	0.000486987	0.00185888	study5_a-Ketoglutarate_vs_Glu
128	C3_02940C_A	5132.18	1.6791	0.21179	7.92815	2.22442e-15	4.72268e-14	study5_a-Ketoglutarate_vs_Glu
129	C1_03260W_A	551.793	-1.12023	0.234132	-4.78462	1.71308e-06	1.15525e-05	study5_a-Ketoglutarate_vs_Glu
130	C3_03460C_A	250.25	1.78192	0.37812	4.71258	2.44599e-06	1.59872e-05	study5_a-Ketoglutarate_vs_Glu
131	CR_10790W_A	1687.39	2.2345	0.363538	6.14655	7.91843e-10	9.11286e-09	study5_a-Ketoglutarate_vs_Glu
132	C1_02890C_A	746.556	1.45062	0.271575	5.3415	9.21816e-08	7.82845e-07	study5_a-Ketoglutarate_vs_Glu
133	C1_10050W_A	76.7952	1.8745	0.563758	3.325	0.000884189	0.00313954	study5_a-Ketoglutarate_vs_Glu
134	C1_05830W_A	88.8853	6.7833	0.834076	8.13271	4.19799e-16	9.75358e-15	study5_a-Ketoglutarate_vs_Glu
135	C6_00730W_A	16.2616	-1.63032	0.653882	-2.4933	0.0126562	0.0310582	study5_a-Ketoglutarate_vs_Glu
136	C3_02950C_A	3966.62	1.02816	0.256742	4.00466	6.21072e-05	0.000299447	study5_a-Ketoglutarate_vs_Glu
137	C1_12160W_A	2299.65	1.29777	0.240853	5.38823	7.11543e-08	6.11014e-07	study5_a-Ketoglutarate_vs_Glu
138	C2_10690W_A	5235.52	-2.18621	0.317615	-6.8832	5.85221e-12	8.74564e-11	study5_a-Ketoglutarate_vs_Glu
139	C1_01750W_A	984.816	-1.05083	0.250869	-4.18876	2.80478e-05	0.000146721	study5_a-Ketoglutarate_vs_Glu
140	C3_06450W_A	1323.56	3.96821	0.248403	15.9749	1.9122e-57	3.09826e-55	study5_a-Ketoglutarate_vs_Glu
141	CR_06150C_A	13364.7	1.81104	0.389346	4.6515	3.29535e-06	2.10909e-05	study5_a-Ketoglutarate_vs_Glu
142	C1_13670W_A	9563.81	2.19688	0.378216	5.80854	6.30197e-09	6.30914e-08	study5_a-Ketoglutarate_vs_Glu
143	C4_04720W_A	3389.58	1.10711	0.477658	2.31778	0.0204613	0.0464924	study5_a-Ketoglutarate_vs_Glu
144	CR_10180W_A	396.467	-1.35484	0.298049	-4.54569	5.47566e-06	3.34461e-05	study5_a-Ketoglutarate_vs_Glu
145	C3_01320C_A	1968.17	1.85767	0.287454	6.46248	1.03e-10	1.32672e-09	study5_a-Ketoglutarate_vs_Glu
146	C5_04050W_A	2339.49	-1.07477	0.181155	-5.93286	2.97698e-09	3.16022e-08	study5_a-Ketoglutarate_vs_Glu
147	CR_05520W_A	3132.39	1.11764	0.482174	2.31792	0.0204535	0.0464924	study5_a-Ketoglutarate_vs_Glu
148	C1_07150W_A	573.24	1.12557	0.444762	2.53073	0.0113825	0.0283618	study5_a-Ketoglutarate_vs_Glu
149	C6_03130W_A	3602.59	1.14947	0.187794	6.1209	9.30486e-10	1.06093e-08	study5_a-Ketoglutarate_vs_Glu
150	C5_05450C_A	1089.46	-1.21495	0.298162	-4.07479	4.6056e-05	0.000229609	study5_a-Ketoglutarate_vs_Glu
151	C1_08350C_A	21765	2.6476	0.928584	2.85122	0.00435514	0.0124777	study5_a-Ketoglutarate_vs_Glu
152	C5_05430W_A	1128.63	2.69766	0.335939	8.0302	9.73114e-16	2.17082e-14	study5_a-Ketoglutarate_vs_Glu
153	C6_00940C_A	237.196	-2.03035	0.397943	-5.10212	3.35866e-07	2.60773e-06	study5_a-Ketoglutarate_vs_Glu
154	C5_05480W_A	3733.63	-2.06419	0.322019	-6.41015	1.45379e-10	1.84177e-09	study5_a-Ketoglutarate_vs_Glu
155	CR_10410C_A	1218.92	1.12371	0.338509	3.31959	0.000901492	0.00319409	study5_a-Ketoglutarate_vs_Glu
156	CR_06760C_A	19920.6	1.44121	0.314585	4.58131	4.6207e-06	2.85639e-05	study5_a-Ketoglutarate_vs_Glu
157	C6_02980C_A	5419.01	1.38435	0.152407	9.08325	1.05377e-19	3.50708e-18	study5_a-Ketoglutarate_vs_Glu
158	C2_09140C_A	7457.37	2.19313	0.35738	6.13668	8.42617e-10	9.64311e-09	study5_a-Ketoglutarate_vs_Glu
159	C3_04930C_A	2424.34	2.08861	0.221252	9.43998	3.72839e-21	1.31176e-19	study5_a-Ketoglutarate_vs_Glu
160	C1_04450C_A	823.451	-3.27681	0.337982	-9.6952	3.16016e-22	1.22372e-20	study5_a-Ketoglutarate_vs_Glu
161	C3_00310C_A	491.315	-1.09815	0.243669	-4.50672	6.58367e-06	3.97408e-05	study5_a-Ketoglutarate_vs_Glu
162	C4_02900C_A	2631.01	1.48612	0.501287	2.96461	0.00303069	0.00914705	study5_a-Ketoglutarate_vs_Glu
163	C3_02980C_A	31.0487	-1.49858	0.574654	-2.60779	0.00911297	0.0233921	study5_a-Ketoglutarate_vs_Glu
164	C2_09470C_A	764.416	-1.11214	0.349585	-3.18132	0.00146605	0.00490834	study5_a-Ketoglutarate_vs_Glu
165	C3_02800W_A	15.6202	2.62406	0.794485	3.30285	0.000957075	0.00336919	study5_a-Ketoglutarate_vs_Glu
166	C4_04380C_A	655.531	-1.08506	0.26612	-4.07733	4.55556e-05	0.000227482	study5_a-Ketoglutarate_vs_Glu
167	C2_00350W_A	1327.34	-1.10136	0.272749	-4.03798	5.3913e-05	0.000264075	study5_a-Ketoglutarate_vs_Glu
168	C1_12250C_A	2841.8	1.2824	0.329676	3.88989	0.00010029	0.000456718	study5_a-Ketoglutarate_vs_Glu
169	C2_06290C_A	7455.11	1.39029	0.191649	7.25432	4.0369e-13	6.92345e-12	study5_a-Ketoglutarate_vs_Glu
170	C2_06570C_A	15521.5	-1.0539	0.428871	-2.45737	0.0139957	0.0338192	study5_a-Ketoglutarate_vs_Glu
171	C2_01000W_A	30650.8	-3.42794	0.818746	-4.18682	2.82893e-05	0.000147858	study5_a-Ketoglutarate_vs_Glu
172	C1_11260C_A	104.873	1.68401	0.454558	3.70471	0.000211633	0.000884608	study5_a-Ketoglutarate_vs_Glu
173	C2_08660C_A	334.354	1.3672	0.260936	5.23959	1.60931e-07	1.3229e-06	study5_a-Ketoglutarate_vs_Glu
174	C2_08100W_A	3261.9	-2.21267	0.226035	-9.78905	1.25463e-22	4.98372e-21	study5_a-Ketoglutarate_vs_Glu
175	C3_07060W_A	6800.24	1.2998	0.22476	5.78307	7.33489e-09	7.24894e-08	study5_a-Ketoglutarate_vs_Glu
176	CR_09210W_A	1477.61	1.06521	0.217643	4.8943	9.86557e-07	6.99796e-06	study5_a-Ketoglutarate_vs_Glu
177	C5_04490C_A	11498	-2.66359	0.270433	-9.84936	6.89828e-23	2.776e-21	study5_a-Ketoglutarate_vs_Glu
178	C5_03430W_A	119.102	-1.99056	0.343567	-5.79379	6.88136e-09	6.85575e-08	study5_a-Ketoglutarate_vs_Glu
179	C5_01400W_A	424.229	1.68907	0.40613	4.15895	3.1971e-05	0.000164862	study5_a-Ketoglutarate_vs_Glu
180	CR_10530W_A	773.647	-1.04833	0.199538	-5.25379	1.48998e-07	1.22973e-06	study5_a-Ketoglutarate_vs_Glu
181	C1_11790W_A	529.045	-1.03018	0.274205	-3.75697	0.000171982	0.000737904	study5_a-Ketoglutarate_vs_Glu
182	C3_02080W_A	817.718	-1.03936	0.206474	-5.03387	4.80676e-07	3.62687e-06	study5_a-Ketoglutarate_vs_Glu
183	C2_07760W_A	1124.21	-1.33191	0.238292	-5.58942	2.27835e-08	2.11901e-07	study5_a-Ketoglutarate_vs_Glu
184	CR_07420W_A	15516.4	2.8671	0.201426	14.234	5.63497e-46	6.80284e-44	study5_a-Ketoglutarate_vs_Glu
185	C1_05150C_A	32.0967	1.86986	0.605333	3.08898	0.00200847	0.00645077	study5_a-Ketoglutarate_vs_Glu
186	C1_06250W_A	687.335	-1.07191	0.374451	-2.86262	0.00420161	0.0120828	study5_a-Ketoglutarate_vs_Glu
187	C1_07550W_A	1362.3	-1.0299	0.165932	-6.20679	5.40781e-10	6.36633e-09	study5_a-Ketoglutarate_vs_Glu
188	C4_03830W_A	1200.53	1.33876	0.406015	3.29731	0.000976149	0.00343045	study5_a-Ketoglutarate_vs_Glu
189	C1_02480W_A	3471.21	-1.19917	0.247229	-4.85044	1.23189e-06	8.58004e-06	study5_a-Ketoglutarate_vs_Glu
190	C5_00660C_A	5178.95	-1.58632	0.215888	-7.34788	2.01377e-13	3.50248e-12	study5_a-Ketoglutarate_vs_Glu
191	C7_02610C_A	2457.25	-3.37073	0.351893	-9.57886	9.81248e-22	3.61769e-20	study5_a-Ketoglutarate_vs_Glu
192	C4_03940C_A	6134.88	-2.39375	0.22274	-10.7469	6.13136e-27	3.40097e-25	study5_a-Ketoglutarate_vs_Glu
193	C5_03600W_A	2414.28	1.08548	0.446217	2.43263	0.0149895	0.0358409	study5_a-Ketoglutarate_vs_Glu
194	CR_05420W_A	26.4549	-1.52457	0.47669	-3.19825	0.00138264	0.00466461	study5_a-Ketoglutarate_vs_Glu
195	C4_04400C_A	649.293	5.12294	0.342128	14.9738	1.08969e-50	1.39776e-48	study5_a-Ketoglutarate_vs_Glu
196	CR_03800C_A	505.066	-1.12481	0.193797	-5.80407	6.4724e-09	6.45876e-08	study5_a-Ketoglutarate_vs_Glu
197	C7_01380W_A	130.776	-1.5335	0.383945	-3.99407	6.49487e-05	0.000310588	study5_a-Ketoglutarate_vs_Glu
198	C3_00850C_A	24055.3	1.37905	0.231096	5.96743	2.41015e-09	2.59882e-08	study5_a-Ketoglutarate_vs_Glu
199	C4_00720W_A	261.375	-1.79753	0.307956	-5.83699	5.31529e-09	5.36496e-08	study5_a-Ketoglutarate_vs_Glu
200	CR_07140C_A	357.709	1.35766	0.421309	3.22248	0.00127086	0.00432542	study5_a-Ketoglutarate_vs_Glu
201	C5_05230C_A	20595.3	1.84226	0.275231	6.69351	2.1788e-11	2.9944e-10	study5_a-Ketoglutarate_vs_Glu
202	CR_04740C_A	6499.55	1.24646	0.414167	3.00954	0.0026164	0.00809098	study5_a-Ketoglutarate_vs_Glu
203	C4_00520W_A	1214.22	1.43688	0.339778	4.22888	2.34853e-05	0.000125086	study5_a-Ketoglutarate_vs_Glu
204	C6_03850C_A	4760.78	2.36396	0.402033	5.88003	4.10198e-09	4.24469e-08	study5_a-Ketoglutarate_vs_Glu
205	C5_04130C_A	13949.2	1.46336	0.406952	3.59591	0.00032326	0.00129578	study5_a-Ketoglutarate_vs_Glu
206	C1_08800W_A	1313.08	-1.32974	0.227225	-5.85211	4.85365e-09	4.9395e-08	study5_a-Ketoglutarate_vs_Glu
207	CR_00620C_A	9079.2	3.14045	0.531572	5.90785	3.46597e-09	3.64785e-08	study5_a-Ketoglutarate_vs_Glu
208	C1_06810W_A	19820.9	4.16361	0.318173	13.086	3.9588e-39	3.99579e-37	study5_a-Ketoglutarate_vs_Glu
209	C4_00960W_A	1651.38	2.17316	0.252349	8.61173	7.19641e-18	2.01401e-16	study5_a-Ketoglutarate_vs_Glu
210	C2_04670W_A	138.156	2.42178	0.415802	5.82437	5.73292e-09	5.75817e-08	study5_a-Ketoglutarate_vs_Glu
211	CR_08880C_A	48.6398	1.89993	0.75506	2.51626	0.0118607	0.0294225	study5_a-Ketoglutarate_vs_Glu
212	C1_09110W_A	873.051	1.0071	0.21316	4.72463	2.3053e-06	1.5149e-05	study5_a-Ketoglutarate_vs_Glu
213	C1_12280C_A	595.529	1.14282	0.340459	3.35671	0.000788745	0.00285329	study5_a-Ketoglutarate_vs_Glu
214	C1_13410W_A	1680.03	1.75011	0.158702	11.0277	2.81079e-28	1.73061e-26	study5_a-Ketoglutarate_vs_Glu
215	C1_11760C_A	2346.26	1.4185	0.148334	9.56292	1.14481e-21	4.1956e-20	study5_a-Ketoglutarate_vs_Glu
216	C1_01630W_A	3440.25	1.39684	0.305918	4.56606	4.96983e-06	3.05687e-05	study5_a-Ketoglutarate_vs_Glu
217	C6_02290C_A	1048.98	1.08674	0.399078	2.72313	0.00646661	0.0175011	study5_a-Ketoglutarate_vs_Glu
218	C2_03170W_A	237.856	-1.33863	0.260062	-5.14733	2.64216e-07	2.08028e-06	study5_a-Ketoglutarate_vs_Glu
219	C1_14470W_A	1073.47	-1.05187	0.247818	-4.24454	2.19041e-05	0.000117375	study5_a-Ketoglutarate_vs_Glu
220	C6_00080C_A	2269.59	1.57539	0.268384	5.8699	4.36071e-09	4.48228e-08	study5_a-Ketoglutarate_vs_Glu
221	C1_07600W_A	3944.95	1.84605	0.231483	7.97487	1.52537e-15	3.31862e-14	study5_a-Ketoglutarate_vs_Glu
222	C1_05890W_A	1583.93	7.84755	0.505597	15.5214	2.48679e-54	3.73443e-52	study5_a-Ketoglutarate_vs_Glu
223	C5_02660C_A	3476.87	1.08182	0.280188	3.86107	0.000112893	0.0005081	study5_a-Ketoglutarate_vs_Glu
224	C2_03710W_A	22.5725	3.85859	0.975797	3.9543	7.67589e-05	0.000359942	study5_a-Ketoglutarate_vs_Glu
225	C7_00400W_A	4431.02	2.88758	0.229429	12.5859	2.52379e-36	2.12862e-34	study5_a-Ketoglutarate_vs_Glu
226	CR_08700C_A	1699.91	1.18055	0.337883	3.49398	0.000475878	0.00182213	study5_a-Ketoglutarate_vs_Glu
227	C6_02040W_A	14108.1	1.05034	0.143193	7.33515	2.21477e-13	3.84121e-12	study5_a-Ketoglutarate_vs_Glu
228	CR_01200W_A	413.659	2.65622	0.271438	9.78572	1.29673e-22	5.11794e-21	study5_a-Ketoglutarate_vs_Glu
229	C2_02430W_A	1301.64	1.30896	0.422802	3.09593	0.00196198	0.00631795	study5_a-Ketoglutarate_vs_Glu
230	C7_03280C_A	4837.32	3.42802	0.298414	11.4875	1.52527e-30	1.03199e-28	study5_a-Ketoglutarate_vs_Glu
231	C1_01980W_A	9721.58	4.79417	0.357243	13.4199	4.6226e-41	4.99322e-39	study5_a-Ketoglutarate_vs_Glu
232	C6_04420W_A	4433.75	-1.25105	0.268057	-4.66711	3.05467e-06	1.96732e-05	study5_a-Ketoglutarate_vs_Glu
233	C6_03370W_A	28095.7	4.12499	0.263797	15.637	4.07653e-55	6.27479e-53	study5_a-Ketoglutarate_vs_Glu
234	C1_05180C_A	1661.79	1.55234	0.217372	7.14138	9.2396e-13	1.52108e-11	study5_a-Ketoglutarate_vs_Glu
235	C2_03520C_A	23571.8	1.77363	0.200894	8.8287	1.05899e-18	3.21193e-17	study5_a-Ketoglutarate_vs_Glu
236	CR_08670C_A	1343.01	2.40039	0.308952	7.76946	7.8824e-15	1.59644e-13	study5_a-Ketoglutarate_vs_Glu
237	C3_00210C_A	392.315	1.28154	0.248281	5.16163	2.44802e-07	1.93485e-06	study5_a-Ketoglutarate_vs_Glu
238	C7_00930W_A	25830.2	1.35919	0.385713	3.52385	0.000425326	0.00164804	study5_a-Ketoglutarate_vs_Glu
239	CR_06670W_A	131.39	8.15662	0.999328	8.1621	3.29241e-16	7.7668e-15	study5_a-Ketoglutarate_vs_Glu
240	C2_08140C_A	6327.25	1.3643	0.239547	5.69535	1.23122e-08	1.19005e-07	study5_a-Ketoglutarate_vs_Glu
241	C4_00120W_A	2407.81	1.13997	0.266145	4.28326	1.84174e-05	0.000100173	study5_a-Ketoglutarate_vs_Glu
242	C2_01760C_A	209.813	1.11205	0.235353	4.72505	2.30063e-06	1.5149e-05	study5_a-Ketoglutarate_vs_Glu
243	CR_07060C_A	2976.08	-2.72256	0.286282	-9.51008	1.90516e-21	6.90004e-20	study5_a-Ketoglutarate_vs_Glu
244	C5_03060C_A	932.244	5.54911	0.424951	13.0582	5.7038e-39	5.66424e-37	study5_a-Ketoglutarate_vs_Glu
245	C4_00980C_A	39.4445	1.87894	0.530104	3.54447	0.000393408	0.00154379	study5_a-Ketoglutarate_vs_Glu
246	C3_05630W_A	173.927	3.88241	0.624075	6.22106	4.93811e-10	5.83569e-09	study5_a-Ketoglutarate_vs_Glu
247	C4_05540W_A	3098.19	-1.67929	0.492017	-3.41307	0.000642356	0.00238683	study5_a-Ketoglutarate_vs_Glu
248	C1_14630C_A	293.113	-2.54339	0.353672	-7.19138	6.41412e-13	1.07159e-11	study5_a-Ketoglutarate_vs_Glu
249	C3_00990C_A	40.1567	1.68076	0.571814	2.93935	0.003289	0.00984463	study5_a-Ketoglutarate_vs_Glu
250	C3_06220C_A	41.4679	1.8805	0.485395	3.87416	0.000106993	0.000482607	study5_a-Ketoglutarate_vs_Glu
251	C3_06870W_A	353131	-1.79342	0.281996	-6.35976	2.02075e-10	2.52369e-09	study5_a-Ketoglutarate_vs_Glu
252	C4_07170C_A	83.2015	-2.09399	0.416107	-5.03234	4.84525e-07	3.64697e-06	study5_a-Ketoglutarate_vs_Glu
253	CR_08550W_A	4282.86	1.58816	0.242565	6.54737	5.85602e-11	7.75387e-10	study5_a-Ketoglutarate_vs_Glu
254	C3_00440W_A	135.304	-1.80128	0.296222	-6.08086	1.19541e-09	1.34309e-08	study5_a-Ketoglutarate_vs_Glu
255	C1_08330C_A	18329.1	3.71755	0.245274	15.1567	6.83817e-52	9.15275e-50	study5_a-Ketoglutarate_vs_Glu
256	C7_03720C_A	4509.76	-1.09842	0.320509	-3.4271	0.000610058	0.0022792	study5_a-Ketoglutarate_vs_Glu
257	CR_02940C_A	247.276	-1.28201	0.263349	-4.86809	1.12679e-06	7.90168e-06	study5_a-Ketoglutarate_vs_Glu
258	C1_02120C_A	48598.2	2.08816	0.333166	6.26764	3.66572e-10	4.42546e-09	study5_a-Ketoglutarate_vs_Glu
259	C4_06610C_A	17243	3.15214	0.249687	12.6244	1.54967e-36	1.32518e-34	study5_a-Ketoglutarate_vs_Glu
260	C7_04090C_A	1606.25	-1.05545	0.243713	-4.33069	1.4864e-05	8.31221e-05	study5_a-Ketoglutarate_vs_Glu
261	C1_11620W_A	229.81	1.03953	0.337142	3.08337	0.0020467	0.00654965	study5_a-Ketoglutarate_vs_Glu
262	CR_03790C_A	219.233	-1.19195	0.451385	-2.64065	0.00827481	0.0215881	study5_a-Ketoglutarate_vs_Glu
263	C1_13850C_A	90.0088	1.7708	0.407706	4.34332	1.40348e-05	7.89873e-05	study5_a-Ketoglutarate_vs_Glu
264	C1_02380C_A	184.365	-1.35673	0.26649	-5.09112	3.55954e-07	2.74982e-06	study5_a-Ketoglutarate_vs_Glu
265	C5_03870C_A	2014.52	1.6687	0.195765	8.52399	1.54154e-17	4.18117e-16	study5_a-Ketoglutarate_vs_Glu
266	C1_03510C_A	9300.98	-1.63623	0.284854	-5.74411	9.24074e-09	9.0887e-08	study5_a-Ketoglutarate_vs_Glu
267	C1_11100W_A	1367.83	1.49845	0.20483	7.31556	2.56306e-13	4.42039e-12	study5_a-Ketoglutarate_vs_Glu
268	C1_13730C_A	358.545	1.19889	0.482246	2.48606	0.0129168	0.0315966	study5_a-Ketoglutarate_vs_Glu
269	C3_02680C_A	1722.59	-1.24533	0.256269	-4.85947	1.17699e-06	8.23492e-06	study5_a-Ketoglutarate_vs_Glu
270	C2_07940C_A	914.984	-1.16942	0.222336	-5.25971	1.44284e-07	1.19725e-06	study5_a-Ketoglutarate_vs_Glu
271	C1_06340W_A	47.6481	1.32382	0.415849	3.18341	0.00145552	0.00487575	study5_a-Ketoglutarate_vs_Glu
272	C1_09100W_A	373.24	1.96976	0.259461	7.59176	3.15583e-14	5.99704e-13	study5_a-Ketoglutarate_vs_Glu
273	C1_07960W_A	424.797	1.56317	0.393725	3.97021	7.18103e-05	0.000339582	study5_a-Ketoglutarate_vs_Glu
274	C1_08840W_A	94.3684	-1.33348	0.301327	-4.42535	9.62842e-06	5.57163e-05	study5_a-Ketoglutarate_vs_Glu
275	C6_03600C_A	188.698	2.3795	0.677333	3.51304	0.000443005	0.00171223	study5_a-Ketoglutarate_vs_Glu
276	C1_13080W_A	6522.51	10.3288	0.520399	19.8479	1.15007e-87	4.16528e-85	study5_a-Ketoglutarate_vs_Glu
277	C5_01810W_A	1579.93	1.03908	0.208646	4.98011	6.3547e-07	4.69135e-06	study5_a-Ketoglutarate_vs_Glu
278	CR_09350C_A	12.7433	-2.90748	0.759341	-3.82895	0.000128693	0.000572518	study5_a-Ketoglutarate_vs_Glu
279	C2_01270W_A	9323.29	-1.0573	0.368128	-2.8721	0.00407752	0.0117865	study5_a-Ketoglutarate_vs_Glu
280	CR_01310W_A	16478.1	1.32072	0.217997	6.05843	1.37458e-09	1.53598e-08	study5_a-Ketoglutarate_vs_Glu
281	C2_04120C_A	1688.56	1.26314	0.430502	2.9341	0.00334512	0.00998832	study5_a-Ketoglutarate_vs_Glu
282	CR_08320W_A	510.33	-1.26145	0.334307	-3.77334	0.000161074	0.000695955	study5_a-Ketoglutarate_vs_Glu
283	C2_03500W_A	4956.51	1.15428	0.185013	6.23891	4.40623e-10	5.28833e-09	study5_a-Ketoglutarate_vs_Glu
284	C3_04440C_A	55.6888	1.37601	0.4707	2.92333	0.00346304	0.0102905	study5_a-Ketoglutarate_vs_Glu
285	C6_02790C_A	1224.92	1.50874	0.326973	4.61428	3.94463e-06	2.48588e-05	study5_a-Ketoglutarate_vs_Glu
286	CR_06590C_A	1911.43	2.13219	0.403819	5.28007	1.29137e-07	1.07591e-06	study5_a-Ketoglutarate_vs_Glu
287	C4_02440C_A	9568.39	1.03489	0.333065	3.10716	0.00188895	0.00613087	study5_a-Ketoglutarate_vs_Glu
288	C2_00840W_A	757.22	-1.19535	0.313878	-3.80833	0.000139909	0.000615299	study5_a-Ketoglutarate_vs_Glu
289	C2_04330C_A	876.608	-1.04043	0.201028	-5.17556	2.27231e-07	1.81226e-06	study5_a-Ketoglutarate_vs_Glu
290	CR_01280C_A	965.42	1.43306	0.216201	6.62835	3.39457e-11	4.57338e-10	study5_a-Ketoglutarate_vs_Glu
291	C1_11320C_A	23793.7	8.31607	0.544964	15.2598	1.41608e-52	1.98154e-50	study5_a-Ketoglutarate_vs_Glu
292	C7_00280W_A	1253.09	3.23353	0.578127	5.59311	2.23035e-08	2.08065e-07	study5_a-Ketoglutarate_vs_Glu
293	C5_04960W_A	4842.91	2.65973	0.223877	11.8803	1.49783e-32	1.08496e-30	study5_a-Ketoglutarate_vs_Glu
294	C2_03270W_A	86410.1	-3.08072	0.287724	-10.7072	9.41747e-27	5.08626e-25	study5_a-Ketoglutarate_vs_Glu
295	C2_04650C_A	1579.4	1.35584	0.239882	5.65213	1.58475e-08	1.51023e-07	study5_a-Ketoglutarate_vs_Glu
296	C1_10850W_A	12.686	2.11539	0.785824	2.69194	0.00710376	0.0189917	study5_a-Ketoglutarate_vs_Glu
297	C3_03760W_A	3179.53	1.40984	0.280722	5.02218	5.10883e-07	3.83131e-06	study5_a-Ketoglutarate_vs_Glu
298	C5_01980C_A	938.863	-1.02917	0.169142	-6.08466	1.16741e-09	1.31404e-08	study5_a-Ketoglutarate_vs_Glu
299	C2_07080C_A	1992.71	1.5092	0.319826	4.71882	2.37217e-06	1.55543e-05	study5_a-Ketoglutarate_vs_Glu
300	C6_01260W_A	195.692	1.3046	0.345472	3.7763	0.000159178	0.000688728	study5_a-Ketoglutarate_vs_Glu
301	C7_01050W_A	68.3324	-1.13868	0.32128	-3.5442	0.000393799	0.00154435	study5_a-Ketoglutarate_vs_Glu
302	C1_09480W_A	212.945	-1.13656	0.24979	-4.55006	5.36317e-06	3.28568e-05	study5_a-Ketoglutarate_vs_Glu
303	C6_01710C_A	3179.73	1.00272	0.23882	4.19865	2.68515e-05	0.000140942	study5_a-Ketoglutarate_vs_Glu
304	CR_03440W_A	76.9227	1.21572	0.377725	3.21854	0.00128847	0.00437808	study5_a-Ketoglutarate_vs_Glu
305	C4_07090C_A	3008.54	-1.16482	0.329442	-3.53573	0.000406651	0.00158634	study5_a-Ketoglutarate_vs_Glu
306	C2_02580W_A	644.872	-2.51124	0.299566	-8.38294	5.16203e-17	1.35823e-15	study5_a-Ketoglutarate_vs_Glu
307	C6_03160C_A	2179.97	-1.14082	0.240275	-4.74799	2.05444e-06	1.36896e-05	study5_a-Ketoglutarate_vs_Glu
308	CR_03580C_A	503.503	3.52239	0.468975	7.51083	5.87552e-14	1.09292e-12	study5_a-Ketoglutarate_vs_Glu
309	C1_09080C_A	1666.18	-1.01866	0.370121	-2.75222	0.0059192	0.0161976	study5_a-Ketoglutarate_vs_Glu
310	C3_04350C_A	161.545	-1.86494	0.36237	-5.1465	2.65391e-07	2.08686e-06	study5_a-Ketoglutarate_vs_Glu
311	C1_05030C_A	799.825	-1.99522	0.261517	-7.62942	2.35807e-14	4.58542e-13	study5_a-Ketoglutarate_vs_Glu
312	CR_09740W_A	1112.19	1.75531	0.314342	5.58409	2.34922e-08	2.17506e-07	study5_a-Ketoglutarate_vs_Glu
313	C2_06990W_A	1153.35	5.37954	0.295748	18.1896	6.23436e-74	1.47634e-71	study5_a-Ketoglutarate_vs_Glu
314	C7_02760W_A	519.265	-1.01403	0.216321	-4.6876	2.7643e-06	1.79344e-05	study5_a-Ketoglutarate_vs_Glu
315	CR_06440C_A	2234.22	1.33479	0.162862	8.19582	2.48893e-16	6.05706e-15	study5_a-Ketoglutarate_vs_Glu
316	C2_10650W_A	473.939	1.30293	0.310535	4.19577	2.71944e-05	0.000142498	study5_a-Ketoglutarate_vs_Glu
317	C2_05130W_A	1431.12	1.9378	0.313927	6.17277	6.71049e-10	7.82509e-09	study5_a-Ketoglutarate_vs_Glu
318	C1_00290W_A	1429.76	-2.03562	0.341616	-5.95878	2.54128e-09	2.7259e-08	study5_a-Ketoglutarate_vs_Glu
319	C6_01440C_A	77.9748	3.28369	0.61731	5.31935	1.0414e-07	8.75945e-07	study5_a-Ketoglutarate_vs_Glu
320	C4_05070C_A	2578.43	1.54023	0.386498	3.98509	6.74542e-05	0.00032195	study5_a-Ketoglutarate_vs_Glu
321	C7_03270W_A	2082.73	1.032	0.338941	3.04477	0.00232861	0.00730747	study5_a-Ketoglutarate_vs_Glu
322	C2_10350C_A	19709.3	2.17169	0.289437	7.50316	6.2299e-14	1.15188e-12	study5_a-Ketoglutarate_vs_Glu
323	C7_00770W_A	3315.44	1.2632	0.391123	3.22969	0.00123927	0.00424134	study5_a-Ketoglutarate_vs_Glu
324	C3_04530C_A	6863.72	2.23136	0.388035	5.75041	8.90259e-09	8.77012e-08	study5_a-Ketoglutarate_vs_Glu
325	C1_07770W_A	140.083	-1.55767	0.342296	-4.55065	5.34811e-06	3.27971e-05	study5_a-Ketoglutarate_vs_Glu
326	C4_02220C_A	239.355	3.8491	0.505191	7.61909	2.55463e-14	4.91526e-13	study5_a-Ketoglutarate_vs_Glu
327	C1_09060C_A	1239.16	1.41325	0.214453	6.59003	4.39752e-11	5.88598e-10	study5_a-Ketoglutarate_vs_Glu
328	CR_05330W_A	1221.65	-1.45042	0.373717	-3.88106	0.000104002	0.000470147	study5_a-Ketoglutarate_vs_Glu
329	C3_04730C_A	17.9479	2.98377	0.769605	3.87701	0.000105747	0.000477336	study5_a-Ketoglutarate_vs_Glu
330	C2_02680W_A	923.302	-1.3081	0.292116	-4.47803	7.53358e-06	4.47725e-05	study5_a-Ketoglutarate_vs_Glu
331	C4_01010C_A	454.002	-1.56878	0.369286	-4.24815	2.15546e-05	0.000115704	study5_a-Ketoglutarate_vs_Glu
332	CR_00540C_A	30099.8	5.53284	0.178617	30.9761	1.13221e-210	2.32367e-207	study5_a-Ketoglutarate_vs_Glu
333	C2_02860W_A	6959.86	-2.6405	0.238659	-11.0639	1.87811e-28	1.16803e-26	study5_a-Ketoglutarate_vs_Glu
334	C2_01690W_A	7567.66	2.02558	0.207863	9.74481	1.9414e-22	7.61349e-21	study5_a-Ketoglutarate_vs_Glu
335	C5_04250W_A	472.089	3.64357	0.898882	4.05345	5.04688e-05	0.000249989	study5_a-Ketoglutarate_vs_Glu
336	C6_00610C_A	7.71871	2.64038	1.02412	2.57818	0.00993218	0.0252646	study5_a-Ketoglutarate_vs_Glu
337	C6_04480C_A	1959.65	-1.44644	0.207852	-6.95899	3.42718e-12	5.32858e-11	study5_a-Ketoglutarate_vs_Glu
338	C3_03570C_A	12.9963	2.45824	0.906769	2.71099	0.00670821	0.0180439	study5_a-Ketoglutarate_vs_Glu
339	C1_07950C_A	730.813	1.0535	0.30328	3.47369	0.000513363	0.00194869	study5_a-Ketoglutarate_vs_Glu
340	C6_00120W_A	250.572	-1.01242	0.292671	-3.45924	0.000541695	0.00204614	study5_a-Ketoglutarate_vs_Glu
341	CR_02920C_A	2897.94	4.21528	0.530411	7.9472	1.9077e-15	4.1213e-14	study5_a-Ketoglutarate_vs_Glu
342	C6_01450C_A	3437.1	5.34072	0.276271	19.3315	2.91995e-83	8.17187e-81	study5_a-Ketoglutarate_vs_Glu
343	C1_10690W_A	609.445	-1.12672	0.240559	-4.68377	2.81652e-06	1.8254e-05	study5_a-Ketoglutarate_vs_Glu
344	C1_02150W_A	7427.32	3.57718	0.504842	7.08575	1.38289e-12	2.22117e-11	study5_a-Ketoglutarate_vs_Glu
345	CR_07220C_A	455.219	-1.03477	0.298024	-3.47211	0.000516391	0.00195777	study5_a-Ketoglutarate_vs_Glu
346	CR_00550W_A	27.4877	-3.35537	0.638697	-5.25346	1.49272e-07	1.23034e-06	study5_a-Ketoglutarate_vs_Glu
347	CR_04110W_A	1392.17	1.01416	0.399914	2.53595	0.0112142	0.027999	study5_a-Ketoglutarate_vs_Glu
348	C5_03440W_A	1157.91	-3.20831	0.356952	-8.98808	2.51595e-19	7.9849e-18	study5_a-Ketoglutarate_vs_Glu
349	C1_13160W_A	3264.29	1.3892	0.440396	3.15444	0.00160808	0.00533455	study5_a-Ketoglutarate_vs_Glu
350	C7_02010C_A	238.626	3.54354	0.339816	10.4278	1.8506e-25	9.1153e-24	study5_a-Ketoglutarate_vs_Glu
351	C3_04020C_A	1951.94	1.73589	0.230245	7.53932	4.72416e-14	8.84094e-13	study5_a-Ketoglutarate_vs_Glu
352	C2_04180C_A	1027.21	1.42056	0.157257	9.03337	1.66471e-19	5.48108e-18	study5_a-Ketoglutarate_vs_Glu
353	C3_02130W_A	1615	1.03921	0.413863	2.511	0.0120389	0.0297925	study5_a-Ketoglutarate_vs_Glu
354	C1_10710C_A	131.691	-1.66837	0.292019	-5.71324	1.10847e-08	1.07818e-07	study5_a-Ketoglutarate_vs_Glu
355	C3_01170W_A	1950.05	1.04126	0.211963	4.91245	8.99439e-07	6.43936e-06	study5_a-Ketoglutarate_vs_Glu
356	C2_09830C_A	2558.23	1.23973	0.248331	4.99225	5.96805e-07	4.43909e-06	study5_a-Ketoglutarate_vs_Glu
357	C3_05390C_A	309.81	-1.02203	0.231721	-4.41062	1.03074e-05	5.92242e-05	study5_a-Ketoglutarate_vs_Glu
358	C1_05160C_A	16852	2.63037	0.381568	6.89358	5.44037e-12	8.23006e-11	study5_a-Ketoglutarate_vs_Glu
359	CR_07800W_A	303.855	1.58499	0.341588	4.64005	3.48324e-06	2.22703e-05	study5_a-Ketoglutarate_vs_Glu
360	C3_06700C_A	7340.09	-1.77097	0.237845	-7.4459	9.62893e-14	1.73857e-12	study5_a-Ketoglutarate_vs_Glu
361	C5_04750C_A	3261.06	1.05254	0.371033	2.83678	0.00455707	0.0129478	study5_a-Ketoglutarate_vs_Glu
362	C2_01160W_A	1297.15	1.12458	0.182034	6.17786	6.49758e-10	7.60563e-09	study5_a-Ketoglutarate_vs_Glu
363	C3_03860W_A	395.754	-1.46133	0.220253	-6.6348	3.24936e-11	4.39699e-10	study5_a-Ketoglutarate_vs_Glu
364	CR_01620C_A	50545.4	2.36209	0.318315	7.4206	1.1659e-13	2.08677e-12	study5_a-Ketoglutarate_vs_Glu
365	C1_09040C_A	817.916	1.06918	0.364161	2.93601	0.0033246	0.00993667	study5_a-Ketoglutarate_vs_Glu
366	C2_10870W_A	450.986	-1.33831	0.284935	-4.69689	2.64157e-06	1.71926e-05	study5_a-Ketoglutarate_vs_Glu
367	C6_03770C_A	2238.02	1.2521	0.197176	6.35017	2.15076e-10	2.68061e-09	study5_a-Ketoglutarate_vs_Glu
368	C7_02920W_A	1036.19	1.75152	0.356533	4.91266	8.98498e-07	6.43936e-06	study5_a-Ketoglutarate_vs_Glu
369	C7_00160C_A	1558.23	1.19826	0.320852	3.73462	0.000188	0.000796639	study5_a-Ketoglutarate_vs_Glu
370	CR_09730C_A	1156.84	1.01329	0.346672	2.92291	0.00346777	0.0102996	study5_a-Ketoglutarate_vs_Glu
371	C6_03260W_A	5367.43	1.95252	0.398067	4.90501	9.34218e-07	6.6651e-06	study5_a-Ketoglutarate_vs_Glu
372	C1_02910C_A	585.632	-1.16151	0.241313	-4.81328	1.48475e-06	1.01461e-05	study5_a-Ketoglutarate_vs_Glu
373	C6_03080C_A	2735.18	1.3862	0.313856	4.41666	1.00237e-05	5.78182e-05	study5_a-Ketoglutarate_vs_Glu
374	C7_03570W_A	3343.07	1.52901	0.457387	3.34292	0.000829021	0.00296933	study5_a-Ketoglutarate_vs_Glu
375	C2_00150W_A	1365.44	1.18343	0.163637	7.23203	4.75838e-13	8.04872e-12	study5_a-Ketoglutarate_vs_Glu
376	C2_04660C_A	4372.97	1.71181	0.241507	7.08803	1.3603e-12	2.19251e-11	study5_a-Ketoglutarate_vs_Glu
377	C5_03310C_A	262.981	-1.3682	0.268137	-5.10261	3.34993e-07	2.60423e-06	study5_a-Ketoglutarate_vs_Glu
378	C7_00630C_A	89.1037	1.31209	0.440581	2.9781	0.00290044	0.00884936	study5_a-Ketoglutarate_vs_Glu
379	C1_01710W_A	5607.3	1.68553	0.288508	5.84221	5.15117e-09	5.20784e-08	study5_a-Ketoglutarate_vs_Glu
380	C3_03980C_A	255.201	1.41285	0.229552	6.15484	7.51511e-10	8.6649e-09	study5_a-Ketoglutarate_vs_Glu
381	CR_09800C_A	3453.82	1.00791	0.412238	2.44497	0.0144863	0.034827	study5_a-Ketoglutarate_vs_Glu
382	C2_03540W_A	4922.01	1.56001	0.198952	7.84113	4.46495e-15	9.25612e-14	study5_a-Ketoglutarate_vs_Glu
383	C2_02310W_A	3954.54	1.70941	0.167264	10.2198	1.61645e-24	7.21193e-23	study5_a-Ketoglutarate_vs_Glu
384	C6_02340W_A	12696.8	1.19388	0.247308	4.82748	1.3827e-06	9.51203e-06	study5_a-Ketoglutarate_vs_Glu
385	C5_00650C_A	2453.23	-1.31719	0.25694	-5.12645	2.95262e-07	2.31289e-06	study5_a-Ketoglutarate_vs_Glu
386	CR_01870C_A	38.0023	-1.89837	0.423348	-4.48418	7.31958e-06	4.36693e-05	study5_a-Ketoglutarate_vs_Glu
387	C1_03230C_A	2416.16	1.94966	0.377472	5.16506	2.40365e-07	1.90958e-06	study5_a-Ketoglutarate_vs_Glu
388	C3_02810C_A	1134.29	1.12256	0.307464	3.65103	0.00026119	0.00107568	study5_a-Ketoglutarate_vs_Glu
389	C3_02190C_A	3400.66	1.53837	0.195281	7.87773	3.33373e-15	6.95789e-14	study5_a-Ketoglutarate_vs_Glu
390	C1_09870W_A	475.605	-1.9881	0.336962	-5.90008	3.63331e-09	3.80447e-08	study5_a-Ketoglutarate_vs_Glu
391	C2_07900W_A	60346	4.28243	0.327136	13.0907	3.72357e-39	3.821e-37	study5_a-Ketoglutarate_vs_Glu
392	C2_05770W_A	850.976	1.16053	0.251542	4.61368	3.95596e-06	2.48793e-05	study5_a-Ketoglutarate_vs_Glu
393	C3_05050W_A	3750.38	9.15458	0.466301	19.6323	8.18668e-86	2.8003e-83	study5_a-Ketoglutarate_vs_Glu
394	C2_02390W_A	2281.32	1.50897	0.3763	4.01003	6.07119e-05	0.000293179	study5_a-Ketoglutarate_vs_Glu
395	CR_04680C_A	92.212	-1.02905	0.44846	-2.29463	0.0217544	0.048884	study5_a-Ketoglutarate_vs_Glu
396	C1_12720C_A	40.6215	1.66565	0.508369	3.27646	0.00105117	0.00366896	study5_a-Ketoglutarate_vs_Glu
397	C5_00880C_A	4132.64	-1.70524	0.531047	-3.21109	0.00132231	0.00447826	study5_a-Ketoglutarate_vs_Glu
398	C1_09030C_A	7992.54	1.30824	0.22153	5.90547	3.51652e-09	3.69475e-08	study5_a-Ketoglutarate_vs_Glu
399	C6_03320W_A	3350.31	-1.7492	0.218544	-8.00387	1.2057e-15	2.66075e-14	study5_a-Ketoglutarate_vs_Glu
400	C1_13180W_A	62.7826	1.7436	0.455324	3.82936	0.000128479	0.000571976	study5_a-Ketoglutarate_vs_Glu
401	C4_04850C_A	1511.03	-2.50171	0.240578	-10.3988	2.51165e-25	1.20814e-23	study5_a-Ketoglutarate_vs_Glu
402	CR_05180C_A	7252.58	3.16893	0.191603	16.5391	1.92019e-61	3.37788e-59	study5_a-Ketoglutarate_vs_Glu
403	C4_07160W_A	270.419	-1.55746	0.229447	-6.78788	1.13791e-11	1.62555e-10	study5_a-Ketoglutarate_vs_Glu
404	C6_03360C_A	660.835	1.13139	0.223625	5.05932	4.2075e-07	3.2101e-06	study5_a-Ketoglutarate_vs_Glu
405	C1_12190W_A	773.143	-1.75246	0.268705	-6.52189	6.94289e-11	9.07588e-10	study5_a-Ketoglutarate_vs_Glu
406	CR_00390W_A	668.011	-1.03272	0.335477	-3.07837	0.00208134	0.00664323	study5_a-Ketoglutarate_vs_Glu
407	C6_01490C_A	2772.55	5.28028	0.33536	15.7451	7.41906e-56	1.17126e-53	study5_a-Ketoglutarate_vs_Glu
408	C6_00190W_A	1844.6	-1.07597	0.243785	-4.41358	1.01673e-05	5.85597e-05	study5_a-Ketoglutarate_vs_Glu
409	C2_08380C_A	735.893	-1.38178	0.264647	-5.22122	1.77746e-07	1.4476e-06	study5_a-Ketoglutarate_vs_Glu
410	C2_10110W_A	4145.33	1.25771	0.361914	3.47517	0.000510536	0.00193916	study5_a-Ketoglutarate_vs_Glu
411	C4_03820C_A	912.441	1.51694	0.34078	4.45137	8.5326e-06	4.99859e-05	study5_a-Ketoglutarate_vs_Glu
412	C4_00160C_A	29493.2	-1.02018	0.196907	-5.18103	2.20661e-07	1.76443e-06	study5_a-Ketoglutarate_vs_Glu
413	C4_02610C_A	1244.59	3.2489	0.337562	9.62458	6.29618e-22	2.36375e-20	study5_a-Ketoglutarate_vs_Glu
414	C3_03560W_A	812.094	-1.26774	0.169119	-7.49614	6.57246e-14	1.20796e-12	study5_a-Ketoglutarate_vs_Glu
415	C5_00930C_A	11559.1	1.1208	0.242408	4.6236	3.77138e-06	2.38647e-05	study5_a-Ketoglutarate_vs_Glu
416	C1_05470W_A	562.174	-1.00681	0.26763	-3.76196	0.00016859	0.000724865	study5_a-Ketoglutarate_vs_Glu
417	C1_09290C_A	5229.02	2.97699	0.35344	8.42289	3.67316e-17	9.74813e-16	study5_a-Ketoglutarate_vs_Glu
418	C7_02750W_A	314.693	-1.46438	0.360266	-4.06473	4.80875e-05	0.000238963	study5_a-Ketoglutarate_vs_Glu
419	C5_05200C_A	1747.2	-1.22874	0.227189	-5.40845	6.35717e-08	5.48194e-07	study5_a-Ketoglutarate_vs_Glu
420	C4_02710C_A	3082.82	1.79102	0.279435	6.40945	1.46042e-10	1.84637e-09	study5_a-Ketoglutarate_vs_Glu
421	CR_08420W_A	2787.27	1.27471	0.503886	2.52976	0.0114139	0.0284286	study5_a-Ketoglutarate_vs_Glu
422	C3_07720C_A	2.77322	4.90048	1.97445	2.48195	0.0130665	0.0319122	study5_a-Ketoglutarate_vs_Glu
423	C1_12220W_A	432.546	-1.58581	0.465494	-3.40673	0.000657466	0.0024371	study5_a-Ketoglutarate_vs_Glu
424	C4_04970C_A	2447.36	1.62148	0.234465	6.91568	4.65615e-12	7.0785e-11	study5_a-Ketoglutarate_vs_Glu
425	C6_04220C_A	3666.11	2.14072	0.240834	8.88877	6.17866e-19	1.91166e-17	study5_a-Ketoglutarate_vs_Glu
426	C6_02500C_A	6930.87	1.75941	0.229309	7.67267	1.68458e-14	3.34579e-13	study5_a-Ketoglutarate_vs_Glu
427	CR_09830W_A	348.991	-1.69033	0.196339	-8.60923	7.35527e-18	2.03993e-16	study5_a-Ketoglutarate_vs_Glu
428	CR_08990C_A	9800.45	1.88771	0.378879	4.98234	6.28186e-07	4.64873e-06	study5_a-Ketoglutarate_vs_Glu
429	CR_10840C_A	11405.8	-1.32236	0.500657	-2.64125	0.00826016	0.0215682	study5_a-Ketoglutarate_vs_Glu
430	C6_04610C_A	412.263	-1.26188	0.309179	-4.0814	4.47644e-05	0.000224077	study5_a-Ketoglutarate_vs_Glu
431	C5_03150W_A	6374.3	1.09238	0.18377	5.94428	2.7767e-09	2.95781e-08	study5_a-Ketoglutarate_vs_Glu
432	C6_00620W_A	1598.25	2.35521	0.260988	9.02422	1.80984e-19	5.92721e-18	study5_a-Ketoglutarate_vs_Glu
433	C1_09020W_A	4815.55	1.98461	0.227502	8.72346	2.69836e-18	7.8367e-17	study5_a-Ketoglutarate_vs_Glu
434	C5_02790C_A	1623.35	-6.03668	0.43134	-13.9952	1.66806e-44	1.9019e-42	study5_a-Ketoglutarate_vs_Glu
435	C4_03620C_A	1511.04	1.7233	0.231064	7.4581	8.77757e-14	1.58951e-12	study5_a-Ketoglutarate_vs_Glu
436	C1_09610W_A	2054.14	-1.24799	0.282957	-4.41053	1.03116e-05	5.92242e-05	study5_a-Ketoglutarate_vs_Glu
437	C6_02550W_A	9.03861	-3.4107	0.978893	-3.48424	0.000493539	0.0018804	study5_a-Ketoglutarate_vs_Glu
438	C2_09960W_A	941.74	1.98088	0.199401	9.93413	2.95739e-23	1.20587e-21	study5_a-Ketoglutarate_vs_Glu
439	CR_06790C_A	636.755	1.70933	0.267146	6.39849	1.56917e-10	1.97172e-09	study5_a-Ketoglutarate_vs_Glu
440	C1_13880C_A	4012.23	1.53682	0.282719	5.43586	5.45313e-08	4.77595e-07	study5_a-Ketoglutarate_vs_Glu
441	C4_04530C_A	5734.37	4.74286	0.390152	12.1564	5.3024e-34	4.08086e-32	study5_a-Ketoglutarate_vs_Glu
442	C3_06030W_A	3052.66	1.66377	0.398408	4.17605	2.96613e-05	0.000154374	study5_a-Ketoglutarate_vs_Glu
443	C4_00100C_A	1588.09	1.21707	0.252469	4.82066	1.43081e-06	9.81014e-06	study5_a-Ketoglutarate_vs_Glu
444	C2_07410W_A	1268.72	-1.05465	0.26308	-4.00887	6.10101e-05	0.000294388	study5_a-Ketoglutarate_vs_Glu
445	CR_04420C_A	439.614	2.2829	0.324116	7.04344	1.87547e-12	2.94574e-11	study5_a-Ketoglutarate_vs_Glu
446	C7_03350C_A	380.957	-1.08353	0.273649	-3.95955	7.50908e-05	0.000353196	study5_a-Ketoglutarate_vs_Glu
447	C7_00870W_A	525.888	2.09023	0.255899	8.16817	3.1309e-16	7.44283e-15	study5_a-Ketoglutarate_vs_Glu
448	C2_00600C_A	1696.25	1.93335	0.307912	6.2789	3.40977e-10	4.13267e-09	study5_a-Ketoglutarate_vs_Glu
449	C3_01810C_A	11096.3	1.04897	0.228457	4.59155	4.39971e-06	2.7335e-05	study5_a-Ketoglutarate_vs_Glu
450	C4_04040W_A	16.6606	4.41571	1.04048	4.24393	2.19639e-05	0.000117593	study5_a-Ketoglutarate_vs_Glu
451	C3_07440W_A	30510.2	-1.95068	0.260916	-7.47628	7.64568e-14	1.39687e-12	study5_a-Ketoglutarate_vs_Glu
452	CR_03780C_A	201.64	-1.21591	0.233207	-5.21385	1.84958e-07	1.4984e-06	study5_a-Ketoglutarate_vs_Glu
453	C3_01460C_A	2678.55	1.89152	0.231554	8.16881	3.11434e-16	7.43216e-15	study5_a-Ketoglutarate_vs_Glu
454	C5_04810W_A	24748	-3.1537	0.315144	-10.0072	1.41757e-23	6.0611e-22	study5_a-Ketoglutarate_vs_Glu
455	C3_06340W_A	116.646	-1.41364	0.342895	-4.12265	3.74533e-05	0.000190264	study5_a-Ketoglutarate_vs_Glu
456	CR_03260W_A	2262.08	1.64365	0.318406	5.16214	2.44147e-07	1.93215e-06	study5_a-Ketoglutarate_vs_Glu
457	C1_08410C_A	2782.99	-2.44768	0.263998	-9.27159	1.83384e-20	6.27276e-19	study5_a-Ketoglutarate_vs_Glu
458	C1_01700W_A	5461.85	1.03495	0.175447	5.89893	3.65858e-09	3.82443e-08	study5_a-Ketoglutarate_vs_Glu
459	CR_04480C_A	2143.21	-2.65919	0.245787	-10.8191	2.79541e-27	1.57902e-25	study5_a-Ketoglutarate_vs_Glu
460	C1_10620W_A	6619.11	1.26171	0.366303	3.44444	0.000572234	0.00214963	study5_a-Ketoglutarate_vs_Glu
461	C3_04630W_A	907.763	1.37271	0.192605	7.12708	1.02522e-12	1.68328e-11	study5_a-Ketoglutarate_vs_Glu
462	CR_10420W_A	2514.16	1.35482	0.29096	4.65636	3.21842e-06	2.06414e-05	study5_a-Ketoglutarate_vs_Glu
463	C6_01170W_A	1267.33	2.21309	0.473837	4.67058	3.00347e-06	1.9384e-05	study5_a-Ketoglutarate_vs_Glu
464	C2_02190C_A	503.645	1.1706	0.238339	4.91148	9.03901e-07	6.46379e-06	study5_a-Ketoglutarate_vs_Glu
465	C3_00360W_A	1460.8	1.52061	0.220703	6.88984	5.58554e-12	8.40835e-11	study5_a-Ketoglutarate_vs_Glu
466	CR_05610C_A	2018.69	2.93247	0.206648	14.1906	1.04709e-45	1.23979e-43	study5_a-Ketoglutarate_vs_Glu
467	C4_00200C_A	28647.7	2.23127	0.40429	5.51899	3.40963e-08	3.08269e-07	study5_a-Ketoglutarate_vs_Glu
468	C7_01800C_A	38020.9	-2.6597	0.330666	-8.04347	8.7328e-16	1.96233e-14	study5_a-Ketoglutarate_vs_Glu
469	CR_05800C_A	1001.2	-1.86178	0.273033	-6.8189	9.17389e-12	1.32903e-10	study5_a-Ketoglutarate_vs_Glu
470	CR_03470W_A	1458.32	-1.09364	0.274924	-3.97799	6.94997e-05	0.000330432	study5_a-Ketoglutarate_vs_Glu
471	C4_02660W_A	392.27	1.81674	0.257387	7.0584	1.68428e-12	2.65221e-11	study5_a-Ketoglutarate_vs_Glu
472	C1_07920W_A	1569.7	1.42639	0.228864	6.23249	4.59083e-10	5.46726e-09	study5_a-Ketoglutarate_vs_Glu
473	C1_00360W_A	771.129	-1.78886	0.264575	-6.76127	1.36785e-11	1.93605e-10	study5_a-Ketoglutarate_vs_Glu
474	CR_05430W_A	82.5643	-1.02472	0.330603	-3.09955	0.00193812	0.00625086	study5_a-Ketoglutarate_vs_Glu
475	C4_03280W_A	10285.5	1.01807	0.266987	3.81319	0.000137187	0.000605491	study5_a-Ketoglutarate_vs_Glu
476	CR_05740C_A	1531.8	1.06179	0.212691	4.99219	5.96974e-07	4.43909e-06	study5_a-Ketoglutarate_vs_Glu
477	C2_03690C_A	233.363	-2.19128	0.378775	-5.78517	7.24389e-09	7.18206e-08	study5_a-Ketoglutarate_vs_Glu
478	C2_05950C_A	1222.97	1.14209	0.270023	4.22961	2.34095e-05	0.000124825	study5_a-Ketoglutarate_vs_Glu
479	C6_02520W_A	5617.85	2.07176	0.23454	8.83331	1.0162e-18	3.0974e-17	study5_a-Ketoglutarate_vs_Glu
480	C1_05760C_A	242.188	1.52059	0.39146	3.8844	0.000102582	0.000464069	study5_a-Ketoglutarate_vs_Glu
481	C5_04720C_A	1842.93	1.08053	0.256417	4.21394	2.50956e-05	0.000132743	study5_a-Ketoglutarate_vs_Glu
482	CR_10240W_A	2054.33	1.21061	0.413783	2.92572	0.00343657	0.0102267	study5_a-Ketoglutarate_vs_Glu
483	C5_00890C_A	1045.37	1.70881	0.366661	4.66046	3.15507e-06	2.02986e-05	study5_a-Ketoglutarate_vs_Glu
484	C7_03140W_A	262.008	-1.07519	0.332726	-3.23146	0.00123158	0.00421738	study5_a-Ketoglutarate_vs_Glu
485	C7_03440W_A	1209.78	1.1027	0.222054	4.96591	6.83803e-07	5.01809e-06	study5_a-Ketoglutarate_vs_Glu
486	C6_00380C_A	573.741	-1.2905	0.189013	-6.82759	8.63554e-12	1.25399e-10	study5_a-Ketoglutarate_vs_Glu
487	C3_04450C_A	19.9532	-1.67502	0.671047	-2.49612	0.0125559	0.0308733	study5_a-Ketoglutarate_vs_Glu
488	C2_08300C_A	15856.5	2.94574	0.402212	7.32386	2.40941e-13	4.16706e-12	study5_a-Ketoglutarate_vs_Glu
489	C2_01620W_A	9274.89	1.15144	0.253943	4.53425	5.78074e-06	3.52048e-05	study5_a-Ketoglutarate_vs_Glu
490	C1_00190C_A	1747.5	4.45037	0.386198	11.5235	1.00408e-30	6.86905e-29	study5_a-Ketoglutarate_vs_Glu
491	C2_00680C_A	417.678	2.61172	0.491095	5.31815	1.0483e-07	8.79343e-07	study5_a-Ketoglutarate_vs_Glu
492	C4_00640W_A	9.65756	-3.1609	1.10998	-2.8477	0.0044037	0.0125876	study5_a-Ketoglutarate_vs_Glu
493	C2_09400C_A	1573.93	-1.03065	0.226015	-4.56008	5.1133e-06	3.14198e-05	study5_a-Ketoglutarate_vs_Glu
494	C5_01090C_A	2299	-1.01412	0.225226	-4.50267	6.7106e-06	4.02702e-05	study5_a-Ketoglutarate_vs_Glu
495	C1_06620C_A	135.153	1.29697	0.288926	4.48891	7.15877e-06	4.27928e-05	study5_a-Ketoglutarate_vs_Glu
496	C2_07750W_A	654.145	-1.40183	0.226271	-6.19538	5.81434e-10	6.81884e-09	study5_a-Ketoglutarate_vs_Glu
497	C2_09380W_A	1304.2	1.36958	0.340682	4.02011	5.81713e-05	0.000282238	study5_a-Ketoglutarate_vs_Glu
498	C7_00220W_A	164.668	-1.66565	0.296572	-5.61633	1.9506e-08	1.83077e-07	study5_a-Ketoglutarate_vs_Glu
499	C2_08900W_A	1632.26	1.33637	0.189033	7.06952	1.55475e-12	2.46083e-11	study5_a-Ketoglutarate_vs_Glu
500	C6_02370C_A	1363.26	1.27036	0.215892	5.88423	3.99905e-09	4.15906e-08	study5_a-Ketoglutarate_vs_Glu
501	C3_01200W_A	2127.65	1.01389	0.370697	2.73509	0.00623641	0.0169611	study5_a-Ketoglutarate_vs_Glu
502	C2_01210C_A	3138.17	1.80192	0.297674	6.05333	1.41883e-09	1.58256e-08	study5_a-Ketoglutarate_vs_Glu
503	CR_03590C_A	76.9936	1.37922	0.369284	3.73484	0.000187835	0.000796486	study5_a-Ketoglutarate_vs_Glu
504	C7_00730W_A	5957.99	1.3353	0.194289	6.87274	6.29798e-12	9.38903e-11	study5_a-Ketoglutarate_vs_Glu
505	C4_03400W_A	2237.75	1.17893	0.211996	5.56109	2.68095e-08	2.47105e-07	study5_a-Ketoglutarate_vs_Glu
506	C6_03540W_A	1114.38	-1.51854	0.313108	-4.84988	1.23538e-06	8.59464e-06	study5_a-Ketoglutarate_vs_Glu
507	C1_11270W_A	6080.29	-1.23506	0.430124	-2.87139	0.00408669	0.0118075	study5_a-Ketoglutarate_vs_Glu
508	CR_05220C_A	761.707	1.38114	0.31483	4.38695	1.14952e-05	6.5655e-05	study5_a-Ketoglutarate_vs_Glu
509	C6_02570C_A	817.571	-1.15336	0.171131	-6.73963	1.58789e-11	2.22319e-10	study5_a-Ketoglutarate_vs_Glu
510	C3_05570W_A	653.568	-1.22486	0.183156	-6.68753	2.26971e-11	3.11238e-10	study5_a-Ketoglutarate_vs_Glu
511	C4_01390W_A	219.977	-1.3681	0.299217	-4.57227	4.82479e-06	2.97956e-05	study5_a-Ketoglutarate_vs_Glu
512	CR_10310W_A	33.5799	-1.06894	0.436042	-2.45147	0.0142276	0.0343392	study5_a-Ketoglutarate_vs_Glu
513	CR_01900C_A	1319.92	-4.41097	0.241177	-18.2893	1.00626e-74	2.47822e-72	study5_a-Ketoglutarate_vs_Glu
514	C2_07550W_A	7521.29	1.48747	0.194528	7.64658	2.06396e-14	4.04707e-13	study5_a-Ketoglutarate_vs_Glu
515	C3_05220W_A	10069.3	1.04052	0.197394	5.2713	1.35463e-07	1.12709e-06	study5_a-Ketoglutarate_vs_Glu
516	C2_00940W_A	1790.88	1.25103	0.39508	3.16653	0.00154271	0.00514265	study5_a-Ketoglutarate_vs_Glu
517	CR_09030C_A	395.166	1.45343	0.212758	6.83141	8.40853e-12	1.22681e-10	study5_a-Ketoglutarate_vs_Glu
518	C7_02100W_A	5978.55	1.14449	0.132883	8.61274	7.13319e-18	2.00544e-16	study5_a-Ketoglutarate_vs_Glu
519	C6_00020W_A	247.054	-1.56581	0.237087	-6.60439	3.99154e-11	5.36591e-10	study5_a-Ketoglutarate_vs_Glu
520	CR_06500C_A	2004.34	-1.51426	0.386024	-3.92272	8.75565e-05	0.000404112	study5_a-Ketoglutarate_vs_Glu
521	C2_08290C_A	86170.3	2.39396	0.406862	5.88396	4.00573e-09	4.15906e-08	study5_a-Ketoglutarate_vs_Glu
522	C7_01780W_A	9033.83	1.79693	0.288287	6.23315	4.57155e-10	5.46545e-09	study5_a-Ketoglutarate_vs_Glu
523	C4_05200C_A	12.4681	-1.88224	0.678912	-2.77244	0.00556376	0.0153668	study5_a-Ketoglutarate_vs_Glu
524	C4_06620C_A	275.361	3.5782	0.427793	8.36433	6.04576e-17	1.57062e-15	study5_a-Ketoglutarate_vs_Glu
525	C4_00430W_A	558.306	-1.09333	0.231757	-4.71757	2.38676e-06	1.56333e-05	study5_a-Ketoglutarate_vs_Glu
526	C1_13100W_A	1367.29	6.38542	1.05917	6.02869	1.6529e-09	1.82161e-08	study5_a-Ketoglutarate_vs_Glu
527	C2_07440C_A	957.934	-2.29435	0.263977	-8.69149	3.57705e-18	1.03399e-16	study5_a-Ketoglutarate_vs_Glu
528	C1_13870W_A	6786.86	2.49925	0.470509	5.3118	1.0855e-07	9.08073e-07	study5_a-Ketoglutarate_vs_Glu
529	C1_01620C_A	927.895	4.64189	0.437905	10.6002	2.97277e-26	1.5381e-24	study5_a-Ketoglutarate_vs_Glu
530	C6_03760C_A	22520.6	1.17649	0.317277	3.70807	0.000208841	0.000874122	study5_a-Ketoglutarate_vs_Glu
531	C2_09320C_A	4707.56	1.16562	0.399102	2.92062	0.00349337	0.0103457	study5_a-Ketoglutarate_vs_Glu
532	C4_04990C_A	322.594	-1.85131	0.348842	-5.30703	1.11425e-07	9.30857e-07	study5_a-Ketoglutarate_vs_Glu
533	C1_07670W_A	107.587	2.81733	0.555575	5.07102	3.95679e-07	3.02633e-06	study5_a-Ketoglutarate_vs_Glu
534	C1_08590C_A	6587.93	-2.02497	0.261964	-7.72996	1.07577e-14	2.1575e-13	study5_a-Ketoglutarate_vs_Glu
535	CR_09100C_A	2230.23	1.04737	0.260175	4.02566	5.68159e-05	0.000276753	study5_a-Ketoglutarate_vs_Glu
536	C3_04430W_A	11792.4	2.36814	0.275051	8.60984	7.31633e-18	2.03831e-16	study5_a-Ketoglutarate_vs_Glu
537	C5_03350W_A	9289.65	1.77681	0.277411	6.40496	1.50405e-10	1.89763e-09	study5_a-Ketoglutarate_vs_Glu
538	C3_01400W_A	1803.62	1.14394	0.174996	6.53695	6.27842e-11	8.25987e-10	study5_a-Ketoglutarate_vs_Glu
539	C5_03970W_A	452.851	-1.53791	0.353317	-4.35277	1.34426e-05	7.59319e-05	study5_a-Ketoglutarate_vs_Glu
540	C2_06460W_A	1133.89	-1.75829	0.293174	-5.99743	2.00461e-09	2.17678e-08	study5_a-Ketoglutarate_vs_Glu
541	C2_01250W_A	696.579	-1.8377	0.274939	-6.68403	2.32456e-11	3.18052e-10	study5_a-Ketoglutarate_vs_Glu
542	C1_08500C_A	199332	-1.83527	0.260899	-7.0344	2.00116e-12	3.13514e-11	study5_a-Ketoglutarate_vs_Glu
543	C6_00930C_A	3837.13	3.47665	0.294296	11.8134	3.32634e-32	2.38142e-30	study5_a-Ketoglutarate_vs_Glu
544	C1_07120W_A	8143.13	2.06116	0.241403	8.53826	1.36259e-17	3.71216e-16	study5_a-Ketoglutarate_vs_Glu
545	C2_05760C_A	3973.74	1.15656	0.159586	7.24726	4.25297e-13	7.25361e-12	study5_a-Ketoglutarate_vs_Glu
546	C3_05980C_A	2415.26	1.9507	0.323047	6.03843	1.55617e-09	1.72326e-08	study5_a-Ketoglutarate_vs_Glu
547	C6_00990W_A	591.645	-1.14808	0.180371	-6.36512	1.95134e-10	2.44195e-09	study5_a-Ketoglutarate_vs_Glu
548	C6_01990W_A	252.698	-6.80891	0.442545	-15.3858	2.03799e-53	2.91812e-51	study5_a-Ketoglutarate_vs_Glu
549	C3_04340W_A	4584.72	-2.04131	0.403563	-5.05822	4.23189e-07	3.22472e-06	study5_a-Ketoglutarate_vs_Glu
550	C2_08330W_A	2528.76	3.09553	0.378467	8.17913	2.85909e-16	6.87633e-15	study5_a-Ketoglutarate_vs_Glu
551	C2_07060W_A	1974.44	-2.65127	0.225197	-11.7731	5.37096e-32	3.80103e-30	study5_a-Ketoglutarate_vs_Glu
552	C4_01720C_A	4930.98	1.18009	0.201599	5.85363	4.80946e-09	4.90262e-08	study5_a-Ketoglutarate_vs_Glu
553	C3_01250W_A	5287.13	1.96092	0.242218	8.09568	5.6946e-16	1.30341e-14	study5_a-Ketoglutarate_vs_Glu
554	CR_07840C_A	1749.71	1.10343	0.395418	2.79053	0.00526216	0.0146272	study5_a-Ketoglutarate_vs_Glu
555	C1_06540C_A	1206.12	1.09873	0.254556	4.31627	1.58685e-05	8.77827e-05	study5_a-Ketoglutarate_vs_Glu
556	CR_02350C_A	2728.44	1.5449	0.271696	5.68614	1.29946e-08	1.25404e-07	study5_a-Ketoglutarate_vs_Glu
557	C5_00670C_A	7344.1	1.73345	0.377856	4.58759	4.48402e-06	2.78027e-05	study5_a-Ketoglutarate_vs_Glu
558	C1_04590W_A	5255.12	1.18559	0.466824	2.53969	0.011095	0.0277577	study5_a-Ketoglutarate_vs_Glu
559	C1_09720W_A	6075.98	-1.40147	0.16613	-8.43597	3.28467e-17	8.75485e-16	study5_a-Ketoglutarate_vs_Glu
560	C3_03130C_A	1.86749	-4.87074	2.02388	-2.40663	0.0161004	0.0380831	study5_a-Ketoglutarate_vs_Glu
561	C3_07300W_A	1063.01	1.67243	0.454316	3.6812	0.000232138	0.000964422	study5_a-Ketoglutarate_vs_Glu
562	C1_07040C_A	6.844	-4.70628	1.71863	-2.73839	0.00617406	0.0168128	study5_a-Ketoglutarate_vs_Glu
563	C1_00220W_A	9938.07	-1.25089	0.302447	-4.13591	3.53549e-05	0.000181249	study5_a-Ketoglutarate_vs_Glu
564	CR_04060C_A	1848.85	-2.23084	0.220748	-10.1058	5.20618e-24	2.24157e-22	study5_a-Ketoglutarate_vs_Glu
565	C1_06230C_A	13957.9	3.50549	0.339599	10.3225	5.57795e-25	2.58222e-23	study5_a-Ketoglutarate_vs_Glu
566	C1_13070C_A	1298.94	2.61398	0.384543	6.79763	1.06357e-11	1.52288e-10	study5_a-Ketoglutarate_vs_Glu
567	C1_12060C_A	312.27	-1.46071	0.21962	-6.65106	2.90985e-11	3.9637e-10	study5_a-Ketoglutarate_vs_Glu
568	CR_07730W_A	494.711	1.60624	0.221576	7.24919	4.19285e-13	7.17093e-12	study5_a-Ketoglutarate_vs_Glu
569	C3_05410W_A	3622.19	1.40537	0.219084	6.41473	1.41072e-10	1.79089e-09	study5_a-Ketoglutarate_vs_Glu
570	C3_05930W_A	3386.91	-1.1938	0.182123	-6.55491	5.56757e-11	7.38782e-10	study5_a-Ketoglutarate_vs_Glu
571	C1_03740W_A	1021.86	1.31576	0.250179	5.25929	1.44615e-07	1.19837e-06	study5_a-Ketoglutarate_vs_Glu
572	C7_03200C_A	1257.55	-1.69899	0.263975	-6.43618	1.22516e-10	1.56176e-09	study5_a-Ketoglutarate_vs_Glu
573	CR_09690C_A	3376.1	1.20744	0.180011	6.70759	1.97866e-11	2.74383e-10	study5_a-Ketoglutarate_vs_Glu
574	C5_04310W_A	809.333	-1.1783	0.308545	-3.81891	0.000134043	0.000593318	study5_a-Ketoglutarate_vs_Glu
575	C7_01440W_A	303.517	1.45602	0.29239	4.97973	6.36737e-07	4.69508e-06	study5_a-Ketoglutarate_vs_Glu
576	CR_02360W_A	22842.7	6.59107	0.281781	23.3908	5.30813e-121	3.26821e-118	study5_a-Ketoglutarate_vs_Glu
577	C7_02000C_A	35.6445	5.19362	1.02886	5.04796	4.4655e-07	3.39014e-06	study5_a-Ketoglutarate_vs_Glu
578	C5_05050W_A	191083	-1.56438	0.382986	-4.0847	4.41343e-05	0.000221825	study5_a-Ketoglutarate_vs_Glu
579	C5_03880C_A	49.6225	1.58718	0.569366	2.78762	0.00530963	0.0147458	study5_a-Ketoglutarate_vs_Glu
580	C2_06680W_A	14791.6	4.37917	0.245943	17.8056	6.38889e-71	1.4569e-68	study5_a-Ketoglutarate_vs_Glu
581	C6_02890C_A	3118.48	6.4298	0.316714	20.3016	1.24517e-91	5.11101e-89	study5_a-Ketoglutarate_vs_Glu
582	CR_05710C_A	354.29	-1.03498	0.233955	-4.42384	9.69604e-06	5.60549e-05	study5_a-Ketoglutarate_vs_Glu
583	C3_03810W_A	1053.87	-1.19456	0.302337	-3.95109	7.77964e-05	0.000364253	study5_a-Ketoglutarate_vs_Glu
584	C5_03510C_A	4907.67	-2.69532	0.331336	-8.13471	4.12911e-16	9.62989e-15	study5_a-Ketoglutarate_vs_Glu
585	CR_10100C_A	29686.2	-9.56274	0.341429	-28.008	1.29826e-172	1.59868e-169	study5_a-Ketoglutarate_vs_Glu
586	C6_03830W_A	3519.55	1.04087	0.206136	5.04945	4.43084e-07	3.36798e-06	study5_a-Ketoglutarate_vs_Glu
587	C7_02240W_A	745.123	3.54495	0.447088	7.92897	2.20971e-15	4.70767e-14	study5_a-Ketoglutarate_vs_Glu
588	C4_02540W_A	2804.73	2.71021	0.285293	9.49977	2.10359e-21	7.53014e-20	study5_a-Ketoglutarate_vs_Glu
589	C4_04080C_A	74.3152	1.04813	0.444287	2.35912	0.0183184	0.0425127	study5_a-Ketoglutarate_vs_Glu
590	C4_02420C_A	544.052	-1.43909	0.20132	-7.14829	8.78678e-13	1.45431e-11	study5_a-Ketoglutarate_vs_Glu
591	C1_09190C_A	15321.7	-1.08338	0.359218	-3.01594	0.00256183	0.00794218	study5_a-Ketoglutarate_vs_Glu
592	C1_08460C_A	3170.55	-1.54802	0.257718	-6.00665	1.89395e-09	2.0639e-08	study5_a-Ketoglutarate_vs_Glu
593	CR_03840C_A	192.936	-1.80044	0.381077	-4.72462	2.30544e-06	1.5149e-05	study5_a-Ketoglutarate_vs_Glu
594	C1_02130C_A	7066.42	2.862	0.484411	5.90822	3.45831e-09	3.64603e-08	study5_a-Ketoglutarate_vs_Glu
595	C4_01320C_A	1060.54	1.33358	0.220755	6.04099	1.53169e-09	1.69921e-08	study5_a-Ketoglutarate_vs_Glu
596	C1_02520W_A	599.974	6.58947	0.591232	11.1453	7.54808e-29	4.944e-27	study5_a-Ketoglutarate_vs_Glu
597	C1_03800W_A	567.933	1.20935	0.414046	2.9208	0.0034913	0.0103455	study5_a-Ketoglutarate_vs_Glu
598	C3_00790W_A	872.154	-1.06246	0.190264	-5.58414	2.34865e-08	2.17506e-07	study5_a-Ketoglutarate_vs_Glu
599	CR_07620W_A	13591.1	2.25286	0.297333	7.57689	3.53944e-14	6.68476e-13	study5_a-Ketoglutarate_vs_Glu
600	C1_10460W_A	1324.98	1.07638	0.240327	4.47884	7.50514e-06	4.46897e-05	study5_a-Ketoglutarate_vs_Glu
601	CR_00070W_A	1249.63	-1.01977	0.220705	-4.62053	3.82763e-06	2.41958e-05	study5_a-Ketoglutarate_vs_Glu
602	C3_04270C_A	1782.26	-1.57021	0.420822	-3.73129	0.000190498	0.000806669	study5_a-Ketoglutarate_vs_Glu
603	C5_02110W_A	2369.05	1.88085	0.385525	4.87867	1.06803e-06	7.5239e-06	study5_a-Ketoglutarate_vs_Glu
604	C7_00110W_A	107.703	-1.6153	0.337988	-4.77915	1.76035e-06	1.18324e-05	study5_a-Ketoglutarate_vs_Glu
605	C3_01060W_A	147.045	2.10468	0.500926	4.20158	2.65057e-05	0.000139245	study5_a-Ketoglutarate_vs_Glu
606	C2_10210C_A	9764.67	1.83515	0.271596	6.7569	1.40974e-11	1.98169e-10	study5_a-Ketoglutarate_vs_Glu
607	CR_07770C_A	1249.42	1.0335	0.228588	4.52124	6.14796e-06	3.72936e-05	study5_a-Ketoglutarate_vs_Glu
608	C1_08400C_A	15876	1.58362	0.37395	4.23484	2.28714e-05	0.000122133	study5_a-Ketoglutarate_vs_Glu
609	C6_01070C_A	882.766	1.372	0.442619	3.09972	0.00193701	0.00625086	study5_a-Ketoglutarate_vs_Glu
610	C4_06960W_A	339.118	-1.19434	0.297677	-4.01221	6.01536e-05	0.000290711	study5_a-Ketoglutarate_vs_Glu
611	C6_03090W_A	12.9318	-1.85748	0.738945	-2.5137	0.0119473	0.0296014	study5_a-Ketoglutarate_vs_Glu
612	C1_01520C_A	7274.01	1.79071	0.204813	8.74314	2.26728e-18	6.64745e-17	study5_a-Ketoglutarate_vs_Glu
613	C2_07570W_A	7677.21	-6.51377	0.419966	-15.5102	2.95765e-54	4.33577e-52	study5_a-Ketoglutarate_vs_Glu
614	C1_06760C_A	1210.89	1.08058	0.39805	2.71469	0.00663376	0.0178827	study5_a-Ketoglutarate_vs_Glu
615	C4_04620C_A	53.3371	-1.6872	0.426709	-3.954	7.68566e-05	0.000360127	study5_a-Ketoglutarate_vs_Glu
616	C3_00460W_A	14035.5	1.40157	0.184562	7.59404	3.10081e-14	5.91073e-13	study5_a-Ketoglutarate_vs_Glu
617	C2_03490C_A	2068.69	1.15896	0.189902	6.10292	1.04145e-09	1.18306e-08	study5_a-Ketoglutarate_vs_Glu
618	C6_03730C_A	2511.71	1.10605	0.296711	3.72771	0.000193226	0.000815977	study5_a-Ketoglutarate_vs_Glu
619	C1_07330W_A	129.09	-1.67064	0.476897	-3.50314	0.000459803	0.00176607	study5_a-Ketoglutarate_vs_Glu
620	C4_02590C_A	1058.08	-1.00596	0.238052	-4.22579	2.381e-05	0.000126596	study5_a-Ketoglutarate_vs_Glu
621	C5_00510W_A	147.165	2.06975	0.307189	6.7377	1.60914e-11	2.24659e-10	study5_a-Ketoglutarate_vs_Glu
622	C2_04960C_A	1242.16	1.48237	0.180882	8.19524	2.50102e-16	6.06252e-15	study5_a-Ketoglutarate_vs_Glu
623	C2_08830W_A	2936.98	2.28542	0.275137	8.30648	9.85816e-17	2.50813e-15	study5_a-Ketoglutarate_vs_Glu
624	C2_10580W_A	503.265	-1.44006	0.3557	-4.04853	5.15405e-05	0.000254275	study5_a-Ketoglutarate_vs_Glu
625	CR_02060W_A	2302.87	-2.16986	0.35237	-6.1579	7.37139e-10	8.53114e-09	study5_a-Ketoglutarate_vs_Glu
626	C1_02180W_A	6172.11	3.29691	0.432447	7.62385	2.46228e-14	4.75244e-13	study5_a-Ketoglutarate_vs_Glu
627	C5_04040C_A	10.0771	-3.22683	0.951622	-3.39088	0.000696685	0.00255175	study5_a-Ketoglutarate_vs_Glu
628	C2_10360C_A	2183.56	1.18098	0.268644	4.39608	1.10225e-05	6.31305e-05	study5_a-Ketoglutarate_vs_Glu
629	C1_11950W_A	523.653	3.18686	0.22799	13.9781	2.12179e-44	2.37524e-42	study5_a-Ketoglutarate_vs_Glu
630	C2_05930W_A	7039.83	1.12209	0.226068	4.96353	6.92221e-07	5.06778e-06	study5_a-Ketoglutarate_vs_Glu
631	C3_07830W_A	1822.32	3.42192	0.265334	12.8967	4.70066e-38	4.38514e-36	study5_a-Ketoglutarate_vs_Glu
632	C1_14340C_A	21046.9	3.12619	0.246408	12.6871	6.97446e-37	6.22344e-35	study5_a-Ketoglutarate_vs_Glu
633	C2_04760W_A	3330.11	1.2454	0.212935	5.84873	4.95328e-09	5.01601e-08	study5_a-Ketoglutarate_vs_Glu
634	C3_07950C_A	19802.2	-1.15787	0.235927	-4.90776	9.21202e-07	6.57986e-06	study5_a-Ketoglutarate_vs_Glu
635	CR_06570C_A	1038.84	-1.22862	0.343951	-3.57206	0.00035418	0.00140508	study5_a-Ketoglutarate_vs_Glu
636	C4_01930C_A	585.983	1.52237	0.312202	4.87624	1.08126e-06	7.60834e-06	study5_a-Ketoglutarate_vs_Glu
637	CR_03870W_A	522.898	-1.19201	0.405924	-2.93653	0.00331907	0.00992498	study5_a-Ketoglutarate_vs_Glu
638	C7_04310C_A	2181.37	1.53166	0.27056	5.66109	1.50417e-08	1.4403e-07	study5_a-Ketoglutarate_vs_Glu
639	C3_07080W_A	1789.3	1.06585	0.23332	4.5682	4.91923e-06	3.0318e-05	study5_a-Ketoglutarate_vs_Glu
640	C5_03460C_A	439.812	-1.22937	0.181455	-6.77508	1.24338e-11	1.76801e-10	study5_a-Ketoglutarate_vs_Glu
641	C3_06410C_A	552.233	-1.04586	0.172003	-6.08047	1.1983e-09	1.34388e-08	study5_a-Ketoglutarate_vs_Glu
642	C2_05210W_A	322.907	-1.01707	0.21693	-4.68845	2.75279e-06	1.78786e-05	study5_a-Ketoglutarate_vs_Glu
643	C3_01940C_A	908.95	-1.95059	0.251688	-7.75004	9.18658e-15	1.84842e-13	study5_a-Ketoglutarate_vs_Glu
644	CR_00750C_A	782.098	-1.00336	0.272045	-3.6882	0.000225848	0.000939559	study5_a-Ketoglutarate_vs_Glu
645	C4_06570C_A	114080	-3.86134	0.373263	-10.3448	4.41646e-25	2.09171e-23	study5_a-Ketoglutarate_vs_Glu
646	CR_03530W_A	12104.9	1.03679	0.154613	6.70568	2.00465e-11	2.77362e-10	study5_a-Ketoglutarate_vs_Glu
647	C3_00560C_A	1352.64	1.31599	0.318411	4.133	3.58061e-05	0.000182953	study5_a-Ketoglutarate_vs_Glu
648	C3_04920C_A	4252.11	1.06412	0.259056	4.1077	3.9962e-05	0.000201677	study5_a-Ketoglutarate_vs_Glu
649	C5_03750W_A	139.999	-1.32561	0.394884	-3.35695	0.000788068	0.00285252	study5_a-Ketoglutarate_vs_Glu
650	C2_00250W_A	34525.9	1.74612	0.391678	4.45805	8.27091e-06	4.85453e-05	study5_a-Ketoglutarate_vs_Glu
651	C6_00330C_A	16196.7	-3.71036	0.421303	-8.80688	1.28683e-18	3.84611e-17	study5_a-Ketoglutarate_vs_Glu
652	CR_00740C_A	350.779	-1.2362	0.269418	-4.58841	4.46643e-06	2.77216e-05	study5_a-Ketoglutarate_vs_Glu
653	C7_02220C_A	1214.37	1.84875	0.299797	6.16666	6.97473e-10	8.08727e-09	study5_a-Ketoglutarate_vs_Glu
654	C4_00790C_A	436.811	-1.304	0.316384	-4.12157	3.76305e-05	0.000191007	study5_a-Ketoglutarate_vs_Glu
655	C7_01760C_A	5104.96	2.23105	0.226265	9.86033	6.1848e-23	2.50525e-21	study5_a-Ketoglutarate_vs_Glu
656	C1_01490W_A	14828.9	2.49018	0.241675	10.3039	6.76963e-25	3.08366e-23	study5_a-Ketoglutarate_vs_Glu
657	C6_00280W_A	16172.8	1.64957	0.270527	6.09764	1.07645e-09	1.21609e-08	study5_a-Ketoglutarate_vs_Glu
658	C7_01030C_A	2267.49	1.11596	0.476135	2.34378	0.0190895	0.0439709	study5_a-Ketoglutarate_vs_Glu
659	C2_05840W_A	607.788	1.11371	0.327359	3.40212	0.000668664	0.00246968	study5_a-Ketoglutarate_vs_Glu
660	C6_02420W_A	921.347	1.08289	0.278467	3.88878	0.000100751	0.000458142	study5_a-Ketoglutarate_vs_Glu
661	C1_09850C_A	6105.03	1.29199	0.220844	5.85023	4.90901e-09	4.98759e-08	study5_a-Ketoglutarate_vs_Glu
662	C2_05180W_A	8412.07	2.28737	0.552471	4.14026	3.46918e-05	0.000177998	study5_a-Ketoglutarate_vs_Glu
663	C3_04170W_A	92.6178	-1.77411	0.365886	-4.8488	1.24212e-06	8.62654e-06	study5_a-Ketoglutarate_vs_Glu
664	C4_01240C_A	796.866	-1.48382	0.276424	-5.36791	7.96525e-08	6.82087e-07	study5_a-Ketoglutarate_vs_Glu
665	C7_03700C_A	945.207	1.31733	0.441523	2.98359	0.00284884	0.00871091	study5_a-Ketoglutarate_vs_Glu
666	C5_00550C_A	558.045	-1.10813	0.204086	-5.4297	5.64477e-08	4.92331e-07	study5_a-Ketoglutarate_vs_Glu
667	C1_11700C_A	2616.01	-1.22445	0.250443	-4.88915	1.01274e-06	7.17542e-06	study5_a-Ketoglutarate_vs_Glu
668	CR_00290W_A	5117.58	2.68436	0.322365	8.32707	8.28698e-17	2.11713e-15	study5_a-Ketoglutarate_vs_Glu
669	C4_06110C_A	4749.92	-1.41957	0.32719	-4.33868	1.43342e-05	8.05991e-05	study5_a-Ketoglutarate_vs_Glu
670	CR_10520C_A	132.354	-1.18224	0.254884	-4.63835	3.51207e-06	2.24081e-05	study5_a-Ketoglutarate_vs_Glu
671	C5_02190C_A	3625.18	1.67952	0.168272	9.98096	1.84672e-23	7.78784e-22	study5_a-Ketoglutarate_vs_Glu
672	C1_01530C_A	4613.3	1.01961	0.229424	4.4442	8.82193e-06	5.1339e-05	study5_a-Ketoglutarate_vs_Glu
673	C3_03610W_A	83.9943	-1.14709	0.386914	-2.96471	0.00302968	0.00914705	study5_a-Ketoglutarate_vs_Glu
674	C3_01820W_A	4307.47	1.00593	0.251701	3.99652	6.42809e-05	0.000308417	study5_a-Ketoglutarate_vs_Glu
675	C7_02500C_A	1013.03	1.6962	0.249425	6.80041	1.04323e-11	1.50075e-10	study5_a-Ketoglutarate_vs_Glu
676	C7_03590C_A	1048.83	1.13613	0.255432	4.4479	8.6714e-06	5.05585e-05	study5_a-Ketoglutarate_vs_Glu
677	C1_02830W_A	1431.17	-1.04892	0.185105	-5.66663	1.45632e-08	1.39714e-07	study5_a-Ketoglutarate_vs_Glu
678	C2_09030W_A	311.947	-1.00323	0.321026	-3.12509	0.00177752	0.00579058	study5_a-Ketoglutarate_vs_Glu
679	C6_03630W_A	266.931	-1.62631	0.278749	-5.83432	5.401e-09	5.44254e-08	study5_a-Ketoglutarate_vs_Glu
680	C1_08790W_A	3345.63	-1.86667	0.266512	-7.00409	2.4859e-12	3.87485e-11	study5_a-Ketoglutarate_vs_Glu
681	C1_10180C_A	3146.22	1.66468	0.291726	5.70631	1.15449e-08	1.12117e-07	study5_a-Ketoglutarate_vs_Glu
682	C4_03720C_A	2179.08	1.2023	0.372341	3.22903	0.0012421	0.00424632	study5_a-Ketoglutarate_vs_Glu
683	C2_01450C_A	666.877	2.49947	0.363799	6.87048	6.39878e-12	9.49333e-11	study5_a-Ketoglutarate_vs_Glu
684	CR_10320W_A	392.681	9.57411	1.46413	6.53911	6.18849e-11	8.15901e-10	study5_a-Ketoglutarate_vs_Glu
685	C6_01300W_A	1139.26	-1.00947	0.24413	-4.13495	3.55033e-05	0.000181858	study5_a-Ketoglutarate_vs_Glu
686	C6_01060C_A	2722.27	-1.59669	0.420927	-3.79328	0.00014867	0.000648273	study5_a-Ketoglutarate_vs_Glu
687	C1_01740W_A	1131.29	2.66722	0.470694	5.66657	1.45682e-08	1.39714e-07	study5_a-Ketoglutarate_vs_Glu
688	C4_06510C_A	1222.25	1.01283	0.234506	4.31898	1.56751e-05	8.69476e-05	study5_a-Ketoglutarate_vs_Glu
689	C6_02540C_A	315.733	-1.22259	0.218206	-5.60292	2.10768e-08	1.97519e-07	study5_a-Ketoglutarate_vs_Glu
690	C6_01480W_A	260.648	-1.46243	0.264489	-5.52927	3.21575e-08	2.93324e-07	study5_a-Ketoglutarate_vs_Glu
691	CR_06340C_A	27183.8	-1.46548	0.316378	-4.63205	3.62071e-06	2.30059e-05	study5_a-Ketoglutarate_vs_Glu
692	C3_04790W_A	839.956	-1.21709	0.18626	-6.53436	6.388e-11	8.36828e-10	study5_a-Ketoglutarate_vs_Glu
693	CR_00350W_A	2128.52	-1.23764	0.161687	-7.65453	1.94014e-14	3.82867e-13	study5_a-Ketoglutarate_vs_Glu
694	C1_11610C_A	2048.01	1.66249	0.347632	4.78232	1.73281e-06	1.16728e-05	study5_a-Ketoglutarate_vs_Glu
695	C3_05090C_A	764.942	-1.34824	0.227984	-5.91376	3.34377e-09	3.53738e-08	study5_a-Ketoglutarate_vs_Glu
696	C1_13400C_A	3366.23	1.50578	0.20249	7.43632	1.03525e-13	1.86375e-12	study5_a-Ketoglutarate_vs_Glu
697	C6_04350C_A	5575.24	1.16458	0.169108	6.88657	5.71532e-12	8.56186e-11	study5_a-Ketoglutarate_vs_Glu
698	C5_02950C_A	9.53973	-5.87878	1.57917	-3.72271	0.000197098	0.000831186	study5_a-Ketoglutarate_vs_Glu
699	C3_02630C_A	2721.67	1.26799	0.186912	6.78391	1.16968e-11	1.66706e-10	study5_a-Ketoglutarate_vs_Glu
700	C7_03560W_A	12260	7.55962	0.448083	16.871	7.34943e-64	1.41408e-61	study5_a-Ketoglutarate_vs_Glu
701	C2_03010C_A	11156.2	-1.3851	0.310667	-4.45846	8.25493e-06	4.8506e-05	study5_a-Ketoglutarate_vs_Glu
702	C4_04230W_A	363.647	-1.34309	0.21344	-6.29261	3.12181e-10	3.81369e-09	study5_a-Ketoglutarate_vs_Glu
703	C2_00670C_A	9.36486	2.62414	1.01614	2.58246	0.00980988	0.0249894	study5_a-Ketoglutarate_vs_Glu
704	C7_04330C_A	467.434	-1.32346	0.254508	-5.20007	1.99211e-07	1.60123e-06	study5_a-Ketoglutarate_vs_Glu
705	C1_02650W_A	3853.79	1.41876	0.207109	6.85031	7.36915e-12	1.08805e-10	study5_a-Ketoglutarate_vs_Glu
706	CR_04790W_A	1691.22	1.84279	0.178436	10.3275	5.29344e-25	2.48792e-23	study5_a-Ketoglutarate_vs_Glu
707	C3_02360C_A	692.345	2.99548	0.93833	3.19236	0.00141117	0.00474526	study5_a-Ketoglutarate_vs_Glu
708	C1_13820C_A	538.74	1.41988	0.326613	4.3473	1.37821e-05	7.77075e-05	study5_a-Ketoglutarate_vs_Glu
709	CR_03450W_A	665.271	3.50255	0.493824	7.09271	1.31507e-12	2.13076e-11	study5_a-Ketoglutarate_vs_Glu
710	C5_04220W_A	23.1221	2.07963	0.732577	2.83879	0.00452856	0.0128846	study5_a-Ketoglutarate_vs_Glu
711	C4_01760W_A	2138.63	-2.06896	0.226619	-9.12967	6.87108e-20	2.31176e-18	study5_a-Ketoglutarate_vs_Glu
712	CR_06460W_A	377.059	2.73726	0.400222	6.83935	7.9554e-12	1.1718e-10	study5_a-Ketoglutarate_vs_Glu
713	CR_10570C_A	1066.38	-1.79777	0.277401	-6.48075	9.12679e-11	1.18552e-09	study5_a-Ketoglutarate_vs_Glu
714	C1_05880W_A	1384.92	1.21214	0.300434	4.03463	5.46889e-05	0.000267026	study5_a-Ketoglutarate_vs_Glu
715	C3_04660C_A	169.339	1.45468	0.390739	3.7229	0.000196949	0.000831126	study5_a-Ketoglutarate_vs_Glu
716	CR_05750W_A	3576.93	1.22606	0.30148	4.06681	4.76609e-05	0.000237034	study5_a-Ketoglutarate_vs_Glu
717	C1_05340C_A	2048.43	1.2232	0.218336	5.60238	2.11428e-08	1.97836e-07	study5_a-Ketoglutarate_vs_Glu
718	C6_00590W_A	2127.99	1.00449	0.283989	3.53709	0.000404567	0.00158053	study5_a-Ketoglutarate_vs_Glu
719	C1_04140W_A	196.336	-1.33097	0.45569	-2.92077	0.00349163	0.0103455	study5_a-Ketoglutarate_vs_Glu
720	C1_12930C_A	103.767	-1.27254	0.402189	-3.16404	0.00155597	0.00518122	study5_a-Ketoglutarate_vs_Glu
721	C6_02710C_A	43.1135	1.39981	0.419341	3.33811	0.000843493	0.00301591	study5_a-Ketoglutarate_vs_Glu
722	C3_05610W_A	83.8328	-2.60075	0.375962	-6.91757	4.59441e-12	7.01929e-11	study5_a-Ketoglutarate_vs_Glu
723	C4_01550C_A	2444.24	1.91374	0.476389	4.01717	5.89019e-05	0.000285109	study5_a-Ketoglutarate_vs_Glu
724	C2_01950C_A	1749.15	1.00638	0.251761	3.99738	6.40476e-05	0.000307599	study5_a-Ketoglutarate_vs_Glu
725	C4_05130C_A	3016.97	3.9883	0.194337	20.5226	1.35214e-93	5.94653e-91	study5_a-Ketoglutarate_vs_Glu
726	C6_03470W_A	1552.72	1.01106	0.204835	4.93595	7.97629e-07	5.78445e-06	study5_a-Ketoglutarate_vs_Glu
727	C2_07700C_A	88.7759	-1.05753	0.327869	-3.22546	0.00125771	0.0042854	study5_a-Ketoglutarate_vs_Glu
728	C3_03580C_A	1304.45	6.4841	0.339492	19.0994	2.55296e-81	6.83417e-79	study5_a-Ketoglutarate_vs_Glu
729	C1_10580C_A	616.72	3.10255	0.413201	7.50856	5.978e-14	1.10863e-12	study5_a-Ketoglutarate_vs_Glu
730	C1_00700W_A	2203.11	1.63619	0.202913	8.06349	7.41456e-16	1.67836e-14	study5_a-Ketoglutarate_vs_Glu
731	C1_04550W_A	461.899	-1.11394	0.231468	-4.81248	1.49068e-06	1.01753e-05	study5_a-Ketoglutarate_vs_Glu
732	C3_05580C_A	7049.74	3.28601	0.43071	7.62927	2.36085e-14	4.58542e-13	study5_a-Ketoglutarate_vs_Glu
733	C2_05990C_A	1666.45	3.71015	0.285844	12.9796	1.59661e-38	1.53599e-36	study5_a-Ketoglutarate_vs_Glu
734	C2_09010W_A	2597.61	1.60998	0.238885	6.73955	1.58876e-11	2.22319e-10	study5_a-Ketoglutarate_vs_Glu
735	C2_01240C_A	582.276	-1.38746	0.24796	-5.5955	2.19992e-08	2.05537e-07	study5_a-Ketoglutarate_vs_Glu
736	C3_06400C_A	935.12	-1.3236	0.222301	-5.95409	2.61516e-09	2.80027e-08	study5_a-Ketoglutarate_vs_Glu
737	C2_06160W_A	306.062	-1.18695	0.218308	-5.43704	5.41737e-08	4.75139e-07	study5_a-Ketoglutarate_vs_Glu
738	CR_09360W_A	301.677	-1.21224	0.281067	-4.31298	1.6107e-05	8.89392e-05	study5_a-Ketoglutarate_vs_Glu
739	C4_00270W_A	50450.7	1.38874	0.254674	5.45303	4.95197e-08	4.37436e-07	study5_a-Ketoglutarate_vs_Glu
740	CR_00360C_A	7537.23	3.17862	0.29754	10.683	1.22267e-26	6.43417e-25	study5_a-Ketoglutarate_vs_Glu
741	C5_05460C_A	705.195	-1.0123	0.211426	-4.78794	1.685e-06	1.13881e-05	study5_a-Ketoglutarate_vs_Glu
742	C2_08310W_A	1673.57	1.15317	0.290594	3.96833	7.23788e-05	0.000342008	study5_a-Ketoglutarate_vs_Glu
743	C5_03250W_A	861.271	1.13919	0.301586	3.77732	0.000158528	0.000686397	study5_a-Ketoglutarate_vs_Glu
744	C2_00260C_A	2106.53	-1.14363	0.2292	-4.98965	6.04893e-07	4.49256e-06	study5_a-Ketoglutarate_vs_Glu
745	C5_03270W_A	56.0099	-2.30034	0.634972	-3.62273	0.000291505	0.00118156	study5_a-Ketoglutarate_vs_Glu
746	C1_10520W_A	345.254	1.03161	0.256487	4.02209	5.76831e-05	0.000280222	study5_a-Ketoglutarate_vs_Glu
747	C5_02000C_A	14623.7	1.99352	0.209047	9.53624	1.48108e-21	5.39586e-20	study5_a-Ketoglutarate_vs_Glu
748	CR_08850W_A	386.034	6.21636	0.564475	11.0126	3.32093e-28	2.02445e-26	study5_a-Ketoglutarate_vs_Glu
749	C3_01080W_A	769.679	1.24962	0.221949	5.63021	1.79992e-08	1.69971e-07	study5_a-Ketoglutarate_vs_Glu
750	C1_11240C_A	3317.88	1.91319	0.266395	7.18178	6.88118e-13	1.14198e-11	study5_a-Ketoglutarate_vs_Glu
751	CR_08860W_A	3902.65	2.82696	0.341795	8.27094	1.32904e-16	3.33997e-15	study5_a-Ketoglutarate_vs_Glu
752	CR_06120W_A	2073.21	2.05949	0.335401	6.14039	8.23214e-10	9.4386e-09	study5_a-Ketoglutarate_vs_Glu
753	CR_01440C_A	3894.71	-3.97494	0.540743	-7.35088	1.96909e-13	3.43447e-12	study5_a-Ketoglutarate_vs_Glu
754	CR_08780W_A	2273.18	1.0654	0.451873	2.35774	0.0183864	0.0426225	study5_a-Ketoglutarate_vs_Glu
755	C3_01280W_A	807.115	-1.90476	0.191174	-9.96349	2.2019e-23	9.22252e-22	study5_a-Ketoglutarate_vs_Glu
756	C5_05510C_A	36.9724	-2.35921	0.795594	-2.96535	0.00302341	0.00913849	study5_a-Ketoglutarate_vs_Glu
757	C7_02150C_A	1341.56	1.00049	0.295515	3.38558	0.000710271	0.00259379	study5_a-Ketoglutarate_vs_Glu
758	CR_06650C_A	1031.68	3.56287	0.283126	12.584	2.5849e-36	2.1507e-34	study5_a-Ketoglutarate_vs_Glu
759	C1_12140W_A	1715.27	1.39052	0.329551	4.21943	2.44924e-05	0.000129999	study5_a-Ketoglutarate_vs_Glu
760	C2_10270W_A	1293.99	1.1451	0.360571	3.1758	0.00149421	0.00499993	study5_a-Ketoglutarate_vs_Glu
761	C4_03670W_A	743.948	-1.0458	0.226391	-4.61943	3.84791e-06	2.4299e-05	study5_a-Ketoglutarate_vs_Glu
762	C5_03810C_A	813.918	1.34385	0.491342	2.73507	0.00623679	0.0169611	study5_a-Ketoglutarate_vs_Glu
763	C7_00090C_A	1287.95	1.69741	0.230232	7.37259	1.67345e-13	2.93545e-12	study5_a-Ketoglutarate_vs_Glu
764	C5_02340C_A	2531.67	1.12623	0.173648	6.48573	8.83042e-11	1.14945e-09	study5_a-Ketoglutarate_vs_Glu
765	C4_02190C_A	144.355	2.87326	0.389481	7.37716	1.61699e-13	2.84451e-12	study5_a-Ketoglutarate_vs_Glu
766	C7_02370W_A	1563.53	1.19927	0.309284	3.87756	0.000105508	0.000476605	study5_a-Ketoglutarate_vs_Glu
767	C6_01650C_A	4746.24	1.59271	0.24694	6.44977	1.12018e-10	1.43986e-09	study5_a-Ketoglutarate_vs_Glu
768	CR_04620C_A	5.20693	-3.44937	1.38716	-2.48665	0.0128953	0.0315567	study5_a-Ketoglutarate_vs_Glu
769	C4_02740W_A	8549.4	1.72572	0.520359	3.31641	0.00091181	0.0032283	study5_a-Ketoglutarate_vs_Glu
770	C3_01770C_A	678.093	-1.61279	0.175117	-9.20983	3.26654e-20	1.11116e-18	study5_a-Ketoglutarate_vs_Glu
771	C3_01480C_A	1772.07	2.26351	0.257693	8.78376	1.58102e-18	4.67997e-17	study5_a-Ketoglutarate_vs_Glu
772	C4_03430W_A	1799.97	1.60052	0.354958	4.50904	6.51217e-06	3.93478e-05	study5_a-Ketoglutarate_vs_Glu
773	C2_03310C_A	1522.48	1.44867	0.252741	5.73185	9.93392e-09	9.72387e-08	study5_a-Ketoglutarate_vs_Glu
774	C2_09880C_A	3968.23	3.3603	0.550956	6.09904	1.06708e-09	1.20994e-08	study5_a-Ketoglutarate_vs_Glu
775	C3_07120W_A	874.191	1.41729	0.256792	5.51919	3.40557e-08	3.08269e-07	study5_a-Ketoglutarate_vs_Glu
776	C5_02960C_A	10.234	-4.23016	1.12524	-3.75935	0.000170356	0.000731436	study5_a-Ketoglutarate_vs_Glu
777	C1_02170C_A	2412.62	1.76141	0.330041	5.33694	9.45288e-08	8.01672e-07	study5_a-Ketoglutarate_vs_Glu
778	C3_06480C_A	3013.14	-1.14284	0.282786	-4.04138	5.31381e-05	0.000260902	study5_a-Ketoglutarate_vs_Glu
779	C1_00800C_A	702.237	-1.1899	0.295742	-4.02342	5.73589e-05	0.000278956	study5_a-Ketoglutarate_vs_Glu
780	C3_07590W_A	734.111	1.0341	0.263688	3.9217	8.79269e-05	0.00040548	study5_a-Ketoglutarate_vs_Glu
781	C1_04950C_A	3470.58	1.45811	0.257688	5.65845	1.52743e-08	1.46031e-07	study5_a-Ketoglutarate_vs_Glu
782	CR_07700W_A	1220.68	1.20205	0.271581	4.42611	9.59486e-06	5.55744e-05	study5_a-Ketoglutarate_vs_Glu
783	C3_03720W_A	4523.81	1.17013	0.21017	5.56752	2.58391e-08	2.38518e-07	study5_a-Ketoglutarate_vs_Glu
784	C3_07640C_A	7642.49	2.52258	0.261951	9.63	5.97311e-22	2.27015e-20	study5_a-Ketoglutarate_vs_Glu
785	C5_01130W_A	749.342	1.0051	0.362868	2.76989	0.00560758	0.0154686	study5_a-Ketoglutarate_vs_Glu
786	C5_02800C_A	11.2852	-3.36514	0.969068	-3.47255	0.00051554	0.00195575	study5_a-Ketoglutarate_vs_Glu
787	CR_10040W_A	663.913	-1.34485	0.315877	-4.25752	2.06711e-05	0.000111154	study5_a-Ketoglutarate_vs_Glu
788	C1_10190W_A	1376.09	1.03162	0.145596	7.08551	1.3853e-12	2.22117e-11	study5_a-Ketoglutarate_vs_Glu
789	C3_06880W_A	222.083	-1.49197	0.255083	-5.84896	4.9466e-09	5.01601e-08	study5_a-Ketoglutarate_vs_Glu
790	C2_06690C_A	1880.06	1.79218	0.3457	5.1842	2.16945e-07	1.73697e-06	study5_a-Ketoglutarate_vs_Glu
791	C7_04340C_A	357.979	-1.19311	0.215108	-5.54656	2.91346e-08	2.66532e-07	study5_a-Ketoglutarate_vs_Glu
792	C6_00750C_A	103610	-2.21017	0.291618	-7.57897	3.48299e-14	6.5984e-13	study5_a-Ketoglutarate_vs_Glu
793	C1_05200C_A	1519.26	1.42677	0.276319	5.16347	2.42408e-07	1.92085e-06	study5_a-Ketoglutarate_vs_Glu
794	C1_08930C_A	1323.97	1.97918	0.179867	11.0036	3.67187e-28	2.19492e-26	study5_a-Ketoglutarate_vs_Glu
795	C2_06020W_A	3750.66	-1.50305	0.179156	-8.3896	4.87803e-17	1.28901e-15	study5_a-Ketoglutarate_vs_Glu
796	C1_04770C_A	2703.09	-1.74083	0.362302	-4.80493	1.54809e-06	1.05089e-05	study5_a-Ketoglutarate_vs_Glu
797	C1_00900W_A	1703.13	1.59702	0.32442	4.92269	8.53606e-07	6.14696e-06	study5_a-Ketoglutarate_vs_Glu
798	C1_13190W_A	5543.52	1.13705	0.386043	2.94539	0.00322552	0.00968284	study5_a-Ketoglutarate_vs_Glu
799	C1_06860W_A	146.655	3.00609	0.511029	5.88242	4.04308e-09	4.19078e-08	study5_a-Ketoglutarate_vs_Glu
800	CR_09460C_A	5888.77	2.48687	0.24984	9.95388	2.42535e-23	1.00898e-21	study5_a-Ketoglutarate_vs_Glu
801	CR_09810W_A	430.467	-1.20867	0.298912	-4.04356	5.2646e-05	0.000258899	study5_a-Ketoglutarate_vs_Glu
802	C6_04200C_A	1193.98	2.32089	0.359087	6.46331	1.0244e-10	1.32227e-09	study5_a-Ketoglutarate_vs_Glu
803	C5_02550C_A	1699.31	1.19336	0.332004	3.59441	0.000325123	0.0013007	study5_a-Ketoglutarate_vs_Glu
804	C4_03910W_A	401.592	-1.32246	0.248164	-5.32898	9.8764e-08	8.34143e-07	study5_a-Ketoglutarate_vs_Glu
805	C4_04950W_A	108.695	-1.03977	0.311431	-3.33867	0.000841813	0.0030134	study5_a-Ketoglutarate_vs_Glu
806	C1_11670W_A	13320.8	1.44192	0.37622	3.83265	0.000126769	0.00056559	study5_a-Ketoglutarate_vs_Glu
807	C6_00480C_A	3983.71	5.60254	0.460862	12.1567	5.28826e-34	4.08086e-32	study5_a-Ketoglutarate_vs_Glu
808	C4_07050W_A	817.953	-1.42075	0.295465	-4.80853	1.52043e-06	1.03554e-05	study5_a-Ketoglutarate_vs_Glu
809	C1_13910C_A	1558.91	1.44206	0.243991	5.91028	3.41535e-09	3.60692e-08	study5_a-Ketoglutarate_vs_Glu
810	C1_00150C_A	2848.73	-1.39084	0.21676	-6.41651	1.39434e-10	1.77375e-09	study5_a-Ketoglutarate_vs_Glu
811	C6_03610W_A	297.707	-1.47594	0.282758	-5.21981	1.79105e-07	1.45674e-06	study5_a-Ketoglutarate_vs_Glu
812	C5_00430W_A	3926.04	2.24996	0.403475	5.57647	2.45453e-08	2.26915e-07	study5_a-Ketoglutarate_vs_Glu
813	C4_04590W_A	5099.36	-1.13698	0.429452	-2.6475	0.0081089	0.0212272	study5_a-Ketoglutarate_vs_Glu
814	C4_01160W_A	715.692	4.22643	0.459382	9.20026	3.57092e-20	1.20803e-18	study5_a-Ketoglutarate_vs_Glu
815	C1_04500W_A	11218.9	4.23213	0.469635	9.01152	2.03217e-19	6.5853e-18	study5_a-Ketoglutarate_vs_Glu
816	C2_01590W_A	15689.5	1.03161	0.233891	4.41064	1.03067e-05	5.92242e-05	study5_a-Ketoglutarate_vs_Glu
817	CR_06140W_A	4738.38	1.05903	0.20822	5.08612	3.65466e-07	2.81623e-06	study5_a-Ketoglutarate_vs_Glu
818	C2_00760C_A	3193.19	1.96065	0.385315	5.08844	3.6103e-07	2.78554e-06	study5_a-Ketoglutarate_vs_Glu
819	C6_01250W_A	263.735	1.01124	0.340426	2.9705	0.00297311	0.00901323	study5_a-Ketoglutarate_vs_Glu
820	C2_02930C_A	5911.79	-1.29602	0.2421	-5.35323	8.63963e-08	7.36762e-07	study5_a-Ketoglutarate_vs_Glu
821	C4_01860C_A	808.897	1.44347	0.274562	5.25737	1.46129e-07	1.20929e-06	study5_a-Ketoglutarate_vs_Glu
822	CR_01640C_A	239.144	1.59042	0.558057	2.84993	0.00437291	0.012517	study5_a-Ketoglutarate_vs_Glu
823	C4_05380C_A	536.177	-1.06997	0.251706	-4.25086	2.12949e-05	0.000114409	study5_a-Ketoglutarate_vs_Glu
824	C1_10740C_A	4888.43	1.23566	0.479511	2.57691	0.00996881	0.0253314	study5_a-Ketoglutarate_vs_Glu
825	C2_05750W_A	1380.35	2.04972	0.380311	5.3896	7.0614e-08	6.07221e-07	study5_a-Ketoglutarate_vs_Glu
826	C1_07890C_A	7627.84	1.36815	0.405466	3.37427	0.000740111	0.00269318	study5_a-Ketoglutarate_vs_Glu
827	C7_01390W_A	637.896	-1.94722	0.317645	-6.13018	8.77807e-10	1.00272e-08	study5_a-Ketoglutarate_vs_Glu
828	C7_02040C_A	24426.4	2.80777	0.220011	12.7619	2.67462e-37	2.45786e-35	study5_a-Ketoglutarate_vs_Glu
829	C3_06360C_A	4084.37	-1.157	0.213538	-5.41823	6.01905e-08	5.22698e-07	study5_a-Ketoglutarate_vs_Glu
830	C2_03320W_A	2501.71	1.09054	0.443509	2.45889	0.0139369	0.0336903	study5_a-Ketoglutarate_vs_Glu
831	C1_14220C_A	676.349	2.96797	0.272898	10.8757	1.5045e-27	8.73888e-26	study5_a-Ketoglutarate_vs_Glu
832	C1_02320C_A	5595.94	1.93112	0.248585	7.76846	7.94476e-15	1.6038e-13	study5_a-Ketoglutarate_vs_Glu
833	C5_04710W_A	707.696	-1.01216	0.21818	-4.63908	3.49961e-06	2.23518e-05	study5_a-Ketoglutarate_vs_Glu
834	C5_04280C_A	3879.26	1.24705	0.227099	5.49119	3.99227e-08	3.56754e-07	study5_a-Ketoglutarate_vs_Glu
835	C5_04800W_A	918.236	-1.8489	0.340516	-5.42968	5.64537e-08	4.92331e-07	study5_a-Ketoglutarate_vs_Glu
836	C2_07140W_A	2739.69	-1.10724	0.204284	-5.42008	5.95714e-08	5.18053e-07	study5_a-Ketoglutarate_vs_Glu
837	C4_03320W_A	1672.49	1.29457	0.207705	6.23272	4.58403e-10	5.46726e-09	study5_a-Ketoglutarate_vs_Glu
838	C1_11850W_A	5555.06	2.35074	0.306586	7.66748	1.75403e-14	3.47253e-13	study5_a-Ketoglutarate_vs_Glu
839	CR_09180W_A	1174.45	1.21575	0.306045	3.97246	7.11343e-05	0.000336903	study5_a-Ketoglutarate_vs_Glu
840	C1_10450W_A	21661.7	-3.24452	0.25613	-12.6675	8.95483e-37	7.87641e-35	study5_a-Ketoglutarate_vs_Glu
841	C1_13370W_A	797.492	1.03382	0.319525	3.2355	0.0012143	0.00416527	study5_a-Ketoglutarate_vs_Glu
842	C6_01900C_A	893.007	-1.4308	0.165822	-8.62856	6.21296e-18	1.75968e-16	study5_a-Ketoglutarate_vs_Glu
843	C4_01250W_A	1787.88	-2.416	0.302475	-7.98743	1.37781e-15	3.01891e-14	study5_a-Ketoglutarate_vs_Glu
844	C1_12200W_A	1246.03	-1.08669	0.287015	-3.78619	0.000152978	0.000664703	study5_a-Ketoglutarate_vs_Glu
845	C6_04160C_A	1977.41	1.49577	0.482224	3.10182	0.00192335	0.00622367	study5_a-Ketoglutarate_vs_Glu
846	C3_01970C_A	33.2874	1.96813	0.575239	3.42142	0.000622959	0.00232036	study5_a-Ketoglutarate_vs_Glu
847	C1_10160W_A	5958.32	2.10809	0.30831	6.83756	8.05537e-12	1.1837e-10	study5_a-Ketoglutarate_vs_Glu
848	CR_02020C_A	1248.86	-1.26506	0.354689	-3.56668	0.000361527	0.00142962	study5_a-Ketoglutarate_vs_Glu
849	C2_05570C_A	1424.78	1.12247	0.218883	5.12819	2.92541e-07	2.29449e-06	study5_a-Ketoglutarate_vs_Glu
850	C1_01840C_A	1881.9	1.91008	0.334983	5.70203	1.1839e-08	1.14611e-07	study5_a-Ketoglutarate_vs_Glu
851	CR_02570C_A	1450.21	-1.48779	0.188054	-7.9115	2.54315e-15	5.36239e-14	study5_a-Ketoglutarate_vs_Glu
852	CR_09070C_A	6711	1.66667	0.225653	7.38596	1.51356e-13	2.68558e-12	study5_a-Ketoglutarate_vs_Glu
853	C4_02390W_A	49372.5	1.23448	0.282432	4.37089	1.23742e-05	7.02838e-05	study5_a-Ketoglutarate_vs_Glu
854	C5_04440C_A	2788.5	3.84151	0.305718	12.5655	3.26699e-36	2.68198e-34	study5_a-Ketoglutarate_vs_Glu
855	C2_02180W_A	1655.95	-1.04122	0.223453	-4.65966	3.16727e-06	2.03544e-05	study5_a-Ketoglutarate_vs_Glu
856	C1_01920W_A	682.226	-1.3745	0.179953	-7.63812	2.2042e-14	4.30833e-13	study5_a-Ketoglutarate_vs_Glu
857	C6_00830C_A	1973.11	-1.44747	0.477739	-3.02983	0.00244693	0.00763211	study5_a-Ketoglutarate_vs_Glu
858	C4_06480C_A	1405.22	-1.01896	0.169228	-6.02121	1.73116e-09	1.89996e-08	study5_a-Ketoglutarate_vs_Glu
859	C1_09690W_A	18480	2.10403	0.292584	7.1912	6.42226e-13	1.07159e-11	study5_a-Ketoglutarate_vs_Glu
860	C4_00910C_A	1593.57	-1.23203	0.219336	-5.61709	1.94196e-08	1.82544e-07	study5_a-Ketoglutarate_vs_Glu
861	C2_09480W_A	389.434	-1.74404	0.315792	-5.52274	3.33753e-08	3.03533e-07	study5_a-Ketoglutarate_vs_Glu
862	C4_04050C_A	4358.97	2.29247	0.406361	5.64147	1.68605e-08	1.59707e-07	study5_a-Ketoglutarate_vs_Glu
863	C3_07730W_A	2347.7	1.31877	0.287634	4.58488	4.54258e-06	2.81092e-05	study5_a-Ketoglutarate_vs_Glu
864	C3_05730C_A	959.262	-1.15525	0.31395	-3.67974	0.000233476	0.000968971	study5_a-Ketoglutarate_vs_Glu
865	C1_04330W_A	9714.7	1.04709	0.35844	2.92123	0.00348648	0.0103452	study5_a-Ketoglutarate_vs_Glu
866	C2_08180C_A	1577.51	1.21115	0.375328	3.2269	0.00125139	0.0042686	study5_a-Ketoglutarate_vs_Glu
867	CR_00410W_A	579.99	-1.1493	0.189906	-6.05192	1.43133e-09	1.59074e-08	study5_a-Ketoglutarate_vs_Glu
868	C6_02670C_A	3166.48	1.26993	0.267544	4.74663	2.06832e-06	1.37672e-05	study5_a-Ketoglutarate_vs_Glu
869	C2_09800C_A	222.746	5.17204	0.659754	7.83935	4.52893e-15	9.35725e-14	study5_a-Ketoglutarate_vs_Glu
870	CR_07250C_A	1310.94	1.89371	0.201305	9.40718	5.09612e-21	1.7727e-19	study5_a-Ketoglutarate_vs_Glu
871	C3_02300W_A	748.854	-2.61618	0.377677	-6.92704	4.29723e-12	6.5816e-11	study5_a-Ketoglutarate_vs_Glu
872	C1_09400C_A	320.69	-1.87797	0.311343	-6.03185	1.62096e-09	1.79178e-08	study5_a-Ketoglutarate_vs_Glu
873	C1_01690C_A	16018.5	1.1756	0.313429	3.75079	0.00017628	0.000754193	study5_a-Ketoglutarate_vs_Glu
874	C2_03870W_A	605.627	-1.03882	0.216847	-4.79059	1.66294e-06	1.12637e-05	study5_a-Ketoglutarate_vs_Glu
875	C2_09240C_A	485.358	1.52214	0.203003	7.49812	6.47408e-14	1.19344e-12	study5_a-Ketoglutarate_vs_Glu
876	C1_02070W_A	433.9	5.71132	0.474978	12.0244	2.64549e-33	1.96244e-31	study5_a-Ketoglutarate_vs_Glu
877	CR_04150W_A	243.449	1.5253	0.29322	5.2019	1.97259e-07	1.5887e-06	study5_a-Ketoglutarate_vs_Glu
878	C1_13610C_A	3099.57	1.26984	0.259042	4.90208	9.48287e-07	6.75764e-06	study5_a-Ketoglutarate_vs_Glu
879	C1_01450W_A	3993.06	2.24066	0.23121	9.69101	3.29259e-22	1.26703e-20	study5_a-Ketoglutarate_vs_Glu
880	C5_05080W_A	1653.09	1.28321	0.250638	5.11975	3.05944e-07	2.39048e-06	study5_a-Ketoglutarate_vs_Glu
881	C6_02200C_A	792.957	1.36066	0.210257	6.47143	9.70798e-11	1.25836e-09	study5_a-Ketoglutarate_vs_Glu
882	CR_10620C_A	1734.33	-1.97016	0.191217	-10.3033	6.81139e-25	3.08366e-23	study5_a-Ketoglutarate_vs_Glu
883	C2_01150W_A	2153.99	1.18494	0.180198	6.57577	4.84024e-11	6.43658e-10	study5_a-Ketoglutarate_vs_Glu
884	C7_03230C_A	172.95	1.42841	0.293229	4.87129	1.10869e-06	7.78361e-06	study5_a-Ketoglutarate_vs_Glu
885	C1_13510C_A	1034.47	-1.00128	0.183371	-5.4604	4.75074e-08	4.20868e-07	study5_a-Ketoglutarate_vs_Glu
886	C2_03640W_A	1434.39	1.53841	0.186341	8.25586	1.50809e-16	3.72905e-15	study5_a-Ketoglutarate_vs_Glu
887	C3_03700C_A	30.2272	1.79533	0.685598	2.61864	0.00882816	0.0228095	study5_a-Ketoglutarate_vs_Glu
888	C1_12260W_A	641.175	1.09788	0.27297	4.02198	5.77102e-05	0.000280222	study5_a-Ketoglutarate_vs_Glu
889	C7_03850W_A	1318.61	1.66218	0.531028	3.13013	0.00174731	0.00572245	study5_a-Ketoglutarate_vs_Glu
890	C6_02320C_A	1644.66	1.61502	0.266333	6.06391	1.32849e-09	1.48718e-08	study5_a-Ketoglutarate_vs_Glu
891	C3_01900C_A	1606.5	1.57939	0.343937	4.5921	4.38811e-06	2.73181e-05	study5_a-Ketoglutarate_vs_Glu
892	CR_00200W_A	99391.4	9.05556	0.357316	25.3433	1.06595e-141	9.37578e-139	study5_a-Ketoglutarate_vs_Glu
893	C1_13350W_A	15379.7	2.07931	0.201749	10.3064	6.59151e-25	3.02865e-23	study5_a-Ketoglutarate_vs_Glu
894	C1_04010C_A	621.939	2.41146	0.282949	8.5226	1.56013e-17	4.21304e-16	study5_a-Ketoglutarate_vs_Glu
895	C7_03630C_A	804.213	1.01244	0.297569	3.40239	0.000667996	0.0024687	study5_a-Ketoglutarate_vs_Glu
896	C1_02840W_A	2640.26	1.09641	0.275257	3.98321	6.79907e-05	0.000323766	study5_a-Ketoglutarate_vs_Glu
897	C6_03990C_A	513.673	-1.35998	0.294101	-4.62419	3.76057e-06	2.38208e-05	study5_a-Ketoglutarate_vs_Glu
898	CR_03100W_A	1290.23	-1.16676	0.313675	-3.71964	0.000199505	0.000839613	study5_a-Ketoglutarate_vs_Glu
899	C1_09210C_A	6559.41	1.89117	0.18374	10.2926	7.60796e-25	3.41914e-23	study5_a-Ketoglutarate_vs_Glu
900	C2_08260W_A	1204.09	8.44798	0.690754	12.2301	2.14717e-34	1.69489e-32	study5_a-Ketoglutarate_vs_Glu
901	C4_00580W_A	767.853	-1.01754	0.163495	-6.22369	4.85585e-10	5.74951e-09	study5_a-Ketoglutarate_vs_Glu
902	C1_04660W_A	459.034	-1.19512	0.18028	-6.62923	3.37447e-11	4.55628e-10	study5_a-Ketoglutarate_vs_Glu
903	C3_03190C_A	1014.06	1.01312	0.302946	3.34421	0.000825162	0.00295895	study5_a-Ketoglutarate_vs_Glu
904	C2_04790C_A	1318.71	1.0003	0.276195	3.62172	0.00029265	0.00118542	study5_a-Ketoglutarate_vs_Glu
905	CR_04960C_A	1632.55	-2.05478	0.206772	-9.93745	2.86052e-23	1.17415e-21	study5_a-Ketoglutarate_vs_Glu
906	C6_03230W_A	2518.9	2.74841	0.434333	6.32787	2.48564e-10	3.0731e-09	study5_a-Ketoglutarate_vs_Glu
907	C6_03700W_A	3789.57	2.91822	0.557793	5.23173	1.67926e-07	1.37673e-06	study5_a-Ketoglutarate_vs_Glu
908	C3_04480C_A	155.62	-1.5923	0.312339	-5.09798	3.43296e-07	2.66206e-06	study5_a-Ketoglutarate_vs_Glu
909	C1_10570C_A	33.8576	2.16692	0.526032	4.11937	3.79904e-05	0.000192674	study5_a-Ketoglutarate_vs_Glu
910	C4_03000C_A	612.061	-2.51222	0.269425	-9.32435	1.11664e-20	3.84085e-19	study5_a-Ketoglutarate_vs_Glu
911	CR_05570C_A	436.306	1.2979	0.306965	4.22819	2.35581e-05	0.000125365	study5_a-Ketoglutarate_vs_Glu
912	CR_10630W_A	341.45	-1.40775	0.204304	-6.89047	5.56103e-12	8.39197e-11	study5_a-Ketoglutarate_vs_Glu
913	C7_02600C_A	6551.63	-2.56769	0.310988	-8.25655	1.4994e-16	3.7225e-15	study5_a-Ketoglutarate_vs_Glu
914	C4_01450W_A	2582.11	1.26687	0.33365	3.797	0.000146456	0.000639686	study5_a-Ketoglutarate_vs_Glu
915	CR_05480W_A	7416.16	2.27499	0.162077	14.0365	9.31914e-45	1.0826e-42	study5_a-Ketoglutarate_vs_Glu
916	C3_07370W_A	1239.49	-1.27616	0.198068	-6.44306	1.17089e-10	1.49568e-09	study5_a-Ketoglutarate_vs_Glu
917	C4_03500C_A	14.1249	-4.23863	0.895824	-4.73154	2.22817e-06	1.47198e-05	study5_a-Ketoglutarate_vs_Glu
918	C5_04380C_A	61.4615	3.01134	0.663453	4.53888	5.65532e-06	3.44987e-05	study5_a-Ketoglutarate_vs_Glu
919	C6_02150C_A	721.495	1.44417	0.268676	5.37512	7.653e-08	6.56261e-07	study5_a-Ketoglutarate_vs_Glu
920	C3_06850W_A	3949.58	-1.92467	0.30562	-6.29759	3.02306e-10	3.72259e-09	study5_a-Ketoglutarate_vs_Glu
921	C4_04840C_A	542.535	2.56017	0.468113	5.46913	4.52246e-08	4.01801e-07	study5_a-Ketoglutarate_vs_Glu
922	CR_07810W_A	1019.49	3.12234	0.362836	8.60536	7.60747e-18	2.10041e-16	study5_a-Ketoglutarate_vs_Glu
923	C4_03950C_A	259.292	-1.76144	0.299977	-5.87191	4.30794e-09	4.44288e-08	study5_a-Ketoglutarate_vs_Glu
924	C3_06140W_A	558.207	-1.45933	0.235206	-6.20446	5.48838e-10	6.44885e-09	study5_a-Ketoglutarate_vs_Glu
925	C4_04330C_A	4340.67	1.50832	0.262823	5.7389	9.52957e-09	9.35782e-08	study5_a-Ketoglutarate_vs_Glu
926	C3_06580W_A	9208.26	7.94994	0.376898	21.0931	9.20044e-99	4.35747e-96	study5_a-Ketoglutarate_vs_Glu
927	CR_01160W_A	26.518	2.05885	0.575611	3.5768	0.000347826	0.00138165	study5_a-Ketoglutarate_vs_Glu
928	C4_01800W_A	116.113	-4.67488	0.408924	-11.4321	2.88886e-30	1.93334e-28	study5_a-Ketoglutarate_vs_Glu
929	C5_00870C_A	81.4651	-1.64978	0.347785	-4.74367	2.09876e-06	1.39396e-05	study5_a-Ketoglutarate_vs_Glu
930	C1_01240W_A	1861.76	3.37306	0.245463	13.7416	5.71614e-43	6.2847e-41	study5_a-Ketoglutarate_vs_Glu
931	C6_00600C_A	6288.61	3.37547	0.255328	13.2202	6.71249e-40	7.12565e-38	study5_a-Ketoglutarate_vs_Glu
932	CR_05170C_A	9285.34	5.29108	0.221144	23.926	1.64418e-126	1.1248e-123	study5_a-Ketoglutarate_vs_Glu
933	C3_02530W_A	912.059	-1.4653	0.233719	-6.26949	3.62221e-10	4.38153e-09	study5_a-Ketoglutarate_vs_Glu
934	C1_04060W_A	366.698	1.38031	0.259429	5.32058	1.0344e-07	8.71242e-07	study5_a-Ketoglutarate_vs_Glu
935	CR_01370C_A	2122.25	1.04281	0.287554	3.62647	0.000287323	0.00116846	study5_a-Ketoglutarate_vs_Glu
936	C6_03860C_A	64.2083	-1.2279	0.322038	-3.81291	0.000137341	0.000605737	study5_a-Ketoglutarate_vs_Glu
937	CR_01320C_A	2401.69	1.0885	0.243679	4.46692	7.93554e-06	4.67999e-05	study5_a-Ketoglutarate_vs_Glu
938	C2_06800C_A	577.752	-1.0037	0.185523	-5.41014	6.29762e-08	5.43821e-07	study5_a-Ketoglutarate_vs_Glu
939	C5_01360W_A	138.063	2.17433	0.533119	4.07851	4.53262e-05	0.000226705	study5_a-Ketoglutarate_vs_Glu
940	C1_12080W_A	939.29	-1.44282	0.227809	-6.33346	2.39727e-10	2.9758e-09	study5_a-Ketoglutarate_vs_Glu
941	C5_00590W_A	28138.7	2.38273	0.271914	8.76279	1.90471e-18	5.61115e-17	study5_a-Ketoglutarate_vs_Glu
942	C1_13440C_A	70.3954	3.60334	0.595399	6.05198	1.43074e-09	1.59074e-08	study5_a-Ketoglutarate_vs_Glu
943	CR_07150W_A	14751.1	-1.05896	0.368635	-2.87265	0.00407045	0.0117772	study5_a-Ketoglutarate_vs_Glu
944	C2_02230C_A	3866.09	8.22502	0.446721	18.412	1.05337e-75	2.70234e-73	study5_a-Ketoglutarate_vs_Glu
945	C6_04330W_A	996.005	1.27681	0.383927	3.32566	0.00088209	0.00313389	study5_a-Ketoglutarate_vs_Glu
946	C6_02580W_A	689.023	-1.80581	0.17176	-10.5135	7.48385e-26	3.77689e-24	study5_a-Ketoglutarate_vs_Glu
947	C4_05110C_A	6308.83	2.44104	0.288083	8.47341	2.38319e-17	6.37971e-16	study5_a-Ketoglutarate_vs_Glu
948	C1_02110C_A	12935.7	3.33084	0.412868	8.06755	7.17203e-16	1.62945e-14	study5_a-Ketoglutarate_vs_Glu
949	C3_01130C_A	6480.78	2.97551	0.373944	7.9571	1.76122e-15	3.81826e-14	study5_a-Ketoglutarate_vs_Glu
950	C3_04060C_A	22956.5	-1.69488	0.433356	-3.91106	9.18926e-05	0.000422541	study5_a-Ketoglutarate_vs_Glu
951	C3_06280W_A	1729.58	-2.24032	0.215416	-10.4	2.48052e-25	1.20256e-23	study5_a-Ketoglutarate_vs_Glu
952	C2_07540W_A	2474.23	1.42804	0.228017	6.26286	3.7799e-10	4.55437e-09	study5_a-Ketoglutarate_vs_Glu
953	CR_01910C_A	1004.33	-5.12048	0.200114	-25.5878	2.08418e-144	2.13871e-141	study5_a-Ketoglutarate_vs_Glu
954	C4_00330C_A	4152.88	1.47612	0.203954	7.2375	4.57047e-13	7.77359e-12	study5_a-Ketoglutarate_vs_Glu
955	C4_00990W_A	195.518	-6.61563	0.452123	-14.6324	1.74622e-48	2.19418e-46	study5_a-Ketoglutarate_vs_Glu
956	C1_07660W_A	265.102	1.85128	0.363339	5.09519	3.48392e-07	2.69818e-06	study5_a-Ketoglutarate_vs_Glu
957	C4_06210C_A	2753.46	1.03377	0.369821	2.79532	0.00518482	0.0144382	study5_a-Ketoglutarate_vs_Glu
958	C1_06350W_A	2582.04	2.6685	0.263119	10.1418	3.60372e-24	1.58487e-22	study5_a-Ketoglutarate_vs_Glu
959	CR_04510W_A	34972.8	-3.37579	0.318547	-10.5974	3.06245e-26	1.57129e-24	study5_a-Ketoglutarate_vs_Glu
960	C3_00880W_A	15322.7	2.91199	0.268286	10.854	1.90827e-27	1.08789e-25	study5_a-Ketoglutarate_vs_Glu
961	C2_09070C_A	6301.94	2.76695	0.258306	10.7119	8.95082e-27	4.87701e-25	study5_a-Ketoglutarate_vs_Glu
962	C3_03800W_A	9977.65	-1.1816	0.278742	-4.23903	2.24486e-05	0.000120083	study5_a-Ketoglutarate_vs_Glu
963	C1_09120W_A	1282	2.53735	0.244507	10.3774	3.14121e-25	1.49926e-23	study5_a-Ketoglutarate_vs_Glu
964	C4_03540C_A	1327.16	1.24885	0.252402	4.94787	7.5031e-07	5.46706e-06	study5_a-Ketoglutarate_vs_Glu
965	C5_02330W_A	1493.42	-1.04181	0.231232	-4.50546	6.62297e-06	3.98998e-05	study5_a-Ketoglutarate_vs_Glu
966	C5_04210C_A	12.9239	3.55564	1.09126	3.25827	0.00112093	0.0038882	study5_a-Ketoglutarate_vs_Glu
967	C1_11690W_A	2703.06	1.0527	0.289085	3.64149	0.00027106	0.00110965	study5_a-Ketoglutarate_vs_Glu
968	C2_04590C_A	5639.86	1.49327	0.224918	6.63919	3.1542e-11	4.28707e-10	study5_a-Ketoglutarate_vs_Glu
969	C5_02780W_A	1132.27	-1.16163	0.31161	-3.72784	0.000193131	0.000815977	study5_a-Ketoglutarate_vs_Glu
970	C5_00050W_A	470.188	-1.29623	0.226578	-5.72091	1.05952e-08	1.03383e-07	study5_a-Ketoglutarate_vs_Glu
971	C2_02060C_A	590.084	1.53522	0.3313	4.63394	3.58777e-06	2.28201e-05	study5_a-Ketoglutarate_vs_Glu
972	C1_05710C_A	68.4198	-1.07896	0.350671	-3.07686	0.00209195	0.00666674	study5_a-Ketoglutarate_vs_Glu
973	C2_08910C_A	1931.36	1.03758	0.146667	7.07435	1.50146e-12	2.40116e-11	study5_a-Ketoglutarate_vs_Glu
974	C4_05530W_A	284.064	-1.47438	0.311106	-4.73914	2.14628e-06	1.42093e-05	study5_a-Ketoglutarate_vs_Glu
975	CR_08310C_A	359.718	4.7914	1.2429	3.85501	0.000115723	0.000519698	study5_a-Ketoglutarate_vs_Glu
976	C4_02890C_A	4895.89	1.53201	0.170178	9.00237	2.20904e-19	7.10617e-18	study5_a-Ketoglutarate_vs_Glu
977	CR_04440C_A	51.7204	-3.67857	0.570585	-6.44702	1.14071e-10	1.46015e-09	study5_a-Ketoglutarate_vs_Glu
978	CR_03250C_A	6187.41	2.07374	0.298805	6.94011	3.91785e-12	6.03055e-11	study5_a-Ketoglutarate_vs_Glu
979	C1_06050C_A	1096.9	1.79171	0.242815	7.37891	1.59586e-13	2.81539e-12	study5_a-Ketoglutarate_vs_Glu
980	CR_02400W_A	73.3016	-1.01695	0.398418	-2.55248	0.0106959	0.0268905	study5_a-Ketoglutarate_vs_Glu
981	C4_00080C_A	1855.96	1.23803	0.243887	5.07624	3.84967e-07	2.95173e-06	study5_a-Ketoglutarate_vs_Glu
982	C1_02770W_A	1927.04	-1.13995	0.164231	-6.94112	3.89007e-12	6.00279e-11	study5_a-Ketoglutarate_vs_Glu
983	C2_06170C_A	12436.9	2.37376	0.314003	7.55967	4.04105e-14	7.58559e-13	study5_a-Ketoglutarate_vs_Glu
984	CR_07790C_A	24964	2.20864	0.392843	5.62221	1.88533e-08	1.77492e-07	study5_a-Ketoglutarate_vs_Glu
985	C2_10440C_A	1809.37	-1.09854	0.166613	-6.59333	4.3008e-11	5.76906e-10	study5_a-Ketoglutarate_vs_Glu
986	CR_05040W_A	173.097	-1.15391	0.33704	-3.42367	0.000617826	0.00230543	study5_a-Ketoglutarate_vs_Glu
987	C2_03290W_A	1507.04	1.49103	0.191184	7.79895	6.24257e-15	1.28118e-13	study5_a-Ketoglutarate_vs_Glu
988	C1_08750W_A	1063.57	1.06966	0.441151	2.42471	0.0153206	0.0365051	study5_a-Ketoglutarate_vs_Glu
989	C1_13060C_A	3550.61	1.0811	0.27828	3.88493	0.000102361	0.00046341	study5_a-Ketoglutarate_vs_Glu
990	C1_00410C_A	3131.92	1.79362	0.226064	7.93412	2.1199e-15	4.54781e-14	study5_a-Ketoglutarate_vs_Glu
991	C3_01430W_A	540.318	1.0165	0.436797	2.32717	0.0199562	0.0455582	study5_a-Ketoglutarate_vs_Glu
992	C2_04290W_A	353.977	1.93855	0.249479	7.77041	7.82348e-15	1.58974e-13	study5_a-Ketoglutarate_vs_Glu
993	C2_05700W_A	15418.9	-1.43946	0.50953	-2.82507	0.00472704	0.013369	study5_a-Ketoglutarate_vs_Glu
994	C1_07030C_A	396.986	-1.35778	0.512439	-2.64964	0.00805773	0.0211202	study5_a-Ketoglutarate_vs_Glu
995	C3_05600W_A	141.143	-2.29082	0.574383	-3.98832	6.65432e-05	0.000317848	study5_a-Ketoglutarate_vs_Glu
996	C2_01200C_A	13808.5	1.39226	0.24928	5.58511	2.33555e-08	2.16892e-07	study5_a-Ketoglutarate_vs_Glu
997	C1_07640C_A	1384.15	1.2247	0.340794	3.59367	0.000326052	0.00130357	study5_a-Ketoglutarate_vs_Glu
998	C1_10240C_A	899.413	2.55189	0.304644	8.37663	5.44668e-17	1.42098e-15	study5_a-Ketoglutarate_vs_Glu
999	C5_02600W_A	8027.34	-2.51856	0.280777	-8.96997	2.96583e-19	9.31663e-18	study5_a-Ketoglutarate_vs_Glu
1000	C3_06040W_A	66.9001	1.00502	0.428501	2.34543	0.0190052	0.0438258	study5_a-Ketoglutarate_vs_Glu
1001	C5_01790C_A	91.6554	1.01581	0.380061	2.67275	0.00752329	0.019923	study5_a-Ketoglutarate_vs_Glu
1002	CR_07370W_A	1708.98	1.39102	0.162358	8.56763	1.05636e-17	2.89068e-16	study5_a-Ketoglutarate_vs_Glu
1003	C5_04940W_A	244.102	1.04114	0.424798	2.4509	0.0142501	0.0343721	study5_a-Ketoglutarate_vs_Glu
1004	C1_08230C_A	2766.99	1.59864	0.236535	6.75857	1.39356e-11	1.96342e-10	study5_a-Ketoglutarate_vs_Glu
1005	C2_02590W_A	9436.28	-4.44214	0.228072	-19.4769	1.72442e-84	5.05584e-82	study5_a-Ketoglutarate_vs_Glu
1006	C6_01510W_A	120.499	-5.77129	0.512469	-11.2617	2.02742e-29	1.34224e-27	study5_a-Ketoglutarate_vs_Glu
1007	CR_01400W_A	5293.61	-1.0206	0.3303	-3.08992	0.00200213	0.00643378	study5_a-Ketoglutarate_vs_Glu
1008	C1_09600C_A	340.3	-1.18591	0.265992	-4.45843	8.25634e-06	4.8506e-05	study5_a-Ketoglutarate_vs_Glu
1009	C7_03310W_A	4222.78	5.76019	0.557888	10.325	5.43231e-25	2.53384e-23	study5_a-Ketoglutarate_vs_Glu
1010	C2_08870C_A	6027.56	1.43893	0.403109	3.56957	0.000357571	0.00141489	study5_a-Ketoglutarate_vs_Glu
1011	C4_01750C_A	144502	-1.62895	0.228823	-7.11882	1.08853e-12	1.77775e-11	study5_a-Ketoglutarate_vs_Glu
1012	C1_07230W_A	3016.2	-1.24072	0.305291	-4.06404	4.82297e-05	0.000239476	study5_a-Ketoglutarate_vs_Glu
1013	C7_01910C_A	733.829	1.67571	0.285434	5.87077	4.33774e-09	4.46613e-08	study5_a-Ketoglutarate_vs_Glu
1014	C3_02480C_A	18462.8	1.32406	0.296344	4.46799	7.89575e-06	4.66099e-05	study5_a-Ketoglutarate_vs_Glu
1015	C3_02640C_A	3575.54	1.69593	0.229172	7.40025	1.35928e-13	2.41881e-12	study5_a-Ketoglutarate_vs_Glu
1016	C2_03350W_A	1679.35	7.16769	0.423299	16.9329	2.57247e-64	5.10925e-62	study5_a-Ketoglutarate_vs_Glu
1017	C1_08140W_A	458.915	-1.0883	0.236829	-4.59532	4.32079e-06	2.69535e-05	study5_a-Ketoglutarate_vs_Glu
1018	C7_03480W_A	3715.22	1.34312	0.290227	4.62784	3.69502e-06	2.34539e-05	study5_a-Ketoglutarate_vs_Glu
1019	C1_09780C_A	2110.77	1.46302	0.195982	7.46507	8.32554e-14	1.51658e-12	study5_a-Ketoglutarate_vs_Glu
1020	C7_03780C_A	1209.35	1.49529	0.24045	6.21869	5.01315e-10	5.91303e-09	study5_a-Ketoglutarate_vs_Glu
1021	C5_00060C_A	983.992	-1.1713	0.236612	-4.95028	7.41062e-07	5.41248e-06	study5_a-Ketoglutarate_vs_Glu
1022	C1_08050W_A	4367.21	1.45576	0.231318	6.29335	3.10687e-10	3.80298e-09	study5_a-Ketoglutarate_vs_Glu
1023	CR_07130C_A	544.323	3.05601	0.412735	7.40429	1.31851e-13	2.35306e-12	study5_a-Ketoglutarate_vs_Glu
1024	C7_00380W_A	516.999	-1.53327	0.243676	-6.29224	3.12924e-10	3.8152e-09	study5_a-Ketoglutarate_vs_Glu
1025	C3_01310W_A	600.864	-1.00251	0.319615	-3.13661	0.00170912	0.00561829	study5_a-Ketoglutarate_vs_Glu
1026	C2_09750W_A	9115.31	1.62421	0.273222	5.94467	2.77006e-09	2.95586e-08	study5_a-Ketoglutarate_vs_Glu
1027	C2_10180W_A	241.11	2.72213	0.335256	8.11956	4.67867e-16	1.08295e-14	study5_a-Ketoglutarate_vs_Glu
1028	C1_04320W_A	2697.22	-2.25309	0.213574	-10.5494	5.11012e-26	2.60025e-24	study5_a-Ketoglutarate_vs_Glu
1029	C5_03980W_A	2127.82	1.53671	0.16223	9.47243	2.73408e-21	9.73049e-20	study5_a-Ketoglutarate_vs_Glu
1030	C1_00390W_A	7743.07	3.02231	0.360587	8.38163	5.21988e-17	1.36761e-15	study5_a-Ketoglutarate_vs_Glu
1031	C7_00590W_A	586.545	-1.05024	0.213537	-4.91832	8.72908e-07	6.26398e-06	study5_a-Ketoglutarate_vs_Glu
1032	C6_03250W_A	1797.18	-2.82809	0.312783	-9.04171	1.54234e-19	5.10547e-18	study5_a-Ketoglutarate_vs_Glu
1033	C6_02690C_A	1421.16	1.07525	0.260674	4.12488	3.70925e-05	0.000188743	study5_a-Ketoglutarate_vs_Glu
1034	C6_01420C_A	1432.71	-2.57259	0.216256	-11.896	1.2413e-32	9.09847e-31	study5_a-Ketoglutarate_vs_Glu
1035	C6_02740W_A	2979.3	1.86775	0.209347	8.92179	4.58821e-19	1.43399e-17	study5_a-Ketoglutarate_vs_Glu
1036	CR_03340C_A	792.541	-1.08515	0.230064	-4.71673	2.39663e-06	1.56812e-05	study5_a-Ketoglutarate_vs_Glu
1037	C3_01610W_A	10012.7	1.94763	0.225386	8.64131	5.55714e-18	1.58404e-16	study5_a-Ketoglutarate_vs_Glu
1038	CR_10160W_A	17754.8	1.73416	0.216148	8.02301	1.03181e-15	2.29345e-14	study5_a-Ketoglutarate_vs_Glu
1039	C7_00270W_A	1116.4	-1.51048	0.289539	-5.21683	1.82012e-07	1.47648e-06	study5_a-Ketoglutarate_vs_Glu
1040	C6_00150W_A	17169.9	2.05215	0.311826	6.58106	4.67097e-11	6.23843e-10	study5_a-Ketoglutarate_vs_Glu
1041	C7_00180W_A	113.571	-1.4147	0.465627	-3.03827	0.00237938	0.00744781	study5_a-Ketoglutarate_vs_Glu
1042	C5_03960W_A	3217.3	1.00368	0.203511	4.93182	8.14662e-07	5.90103e-06	study5_a-Ketoglutarate_vs_Glu
1043	C3_01540W_A	10469.9	-7.49762	0.373818	-20.0568	1.75912e-89	6.76933e-87	study5_a-Ketoglutarate_vs_Glu
1044	CR_09550C_A	2413.24	2.11717	0.198341	10.6744	1.34099e-26	6.99702e-25	study5_a-Ketoglutarate_vs_Glu
1045	CR_08800W_A	1552.17	1.51493	0.27591	5.49068	4.00397e-08	3.57282e-07	study5_a-Ketoglutarate_vs_Glu
1046	C2_08120W_A	4077.47	1.18137	0.274887	4.29766	1.72608e-05	9.45503e-05	study5_a-Ketoglutarate_vs_Glu
1047	CR_09290W_A	459.372	-1.1906	0.285792	-4.16596	3.10044e-05	0.000160821	study5_a-Ketoglutarate_vs_Glu
1048	C4_06780C_A	1509.53	2.23508	0.286636	7.79762	6.3084e-15	1.29039e-13	study5_a-Ketoglutarate_vs_Glu
1049	C4_02620C_A	10108.4	1.04761	0.254727	4.11268	3.91092e-05	0.00019786	study5_a-Ketoglutarate_vs_Glu
1050	C2_06100W_A	5554.33	-1.1202	0.161967	-6.91625	4.63771e-12	7.06791e-11	study5_a-Ketoglutarate_vs_Glu
1051	CR_08160W_A	2777.89	1.43108	0.235103	6.08701	1.15037e-09	1.29723e-08	study5_a-Ketoglutarate_vs_Glu
1052	C4_04000W_A	2669.19	1.29484	0.354756	3.64995	0.000262291	0.0010795	study5_a-Ketoglutarate_vs_Glu
1053	C3_04550C_A	3277.66	-2.64939	0.320537	-8.26549	1.39122e-16	3.4679e-15	study5_a-Ketoglutarate_vs_Glu
1054	C1_05510C_A	495.308	-1.04454	0.327295	-3.19145	0.00141563	0.00475765	study5_a-Ketoglutarate_vs_Glu
1055	C1_03950C_A	154.064	1.17719	0.368125	3.1978	0.00138481	0.00466683	study5_a-Ketoglutarate_vs_Glu
1056	C3_01410C_A	2679.89	2.17438	0.264481	8.22129	2.01319e-16	4.91873e-15	study5_a-Ketoglutarate_vs_Glu
1057	C4_03890W_A	7664.9	1.99515	0.330947	6.0286	1.65386e-09	1.82161e-08	study5_a-Ketoglutarate_vs_Glu
1058	C6_00630W_A	88.4036	-1.21195	0.353191	-3.43142	0.000600439	0.00224599	study5_a-Ketoglutarate_vs_Glu
1059	C2_06970W_A	371.489	-4.84897	0.580447	-8.35386	6.60673e-17	1.70915e-15	study5_a-Ketoglutarate_vs_Glu
1060	C6_01500C_A	3828.28	6.09101	0.375418	16.2246	3.37758e-59	5.62048e-57	study5_a-Ketoglutarate_vs_Glu
1061	C1_07220W_A	13102.1	5.32634	0.410866	12.9637	1.9658e-38	1.86206e-36	study5_a-Ketoglutarate_vs_Glu
1062	C3_04070C_A	7749.06	3.50106	0.315048	11.1128	1.08701e-28	7.04496e-27	study5_a-Ketoglutarate_vs_Glu
1063	CR_04210C_A	2136.33	-9.91552	0.410585	-24.1498	7.51119e-129	5.7808e-126	study5_a-Ketoglutarate_vs_Glu
1064	C6_03240W_A	752.199	2.15341	0.333119	6.4644	1.01702e-10	1.3155e-09	study5_a-Ketoglutarate_vs_Glu
1065	C1_03400W_A	2263.83	1.34433	0.262748	5.11643	3.11365e-07	2.42976e-06	study5_a-Ketoglutarate_vs_Glu
1066	C5_04690C_A	174.913	2.92855	0.412603	7.09773	1.26819e-12	2.06022e-11	study5_a-Ketoglutarate_vs_Glu
1067	C2_00930C_A	1320.37	1.46182	0.21596	6.76896	1.29709e-11	1.84014e-10	study5_a-Ketoglutarate_vs_Glu
1068	C2_08820C_A	74.588	2.70366	0.49035	5.51372	3.51322e-08	3.16704e-07	study5_a-Ketoglutarate_vs_Glu
1069	C2_09220W_A	8729.9	1.04784	0.376658	2.78195	0.00540336	0.0149723	study5_a-Ketoglutarate_vs_Glu
1070	C1_03320C_A	2961.65	1.2502	0.290244	4.30743	1.65162e-05	9.08761e-05	study5_a-Ketoglutarate_vs_Glu
1071	C1_01780C_A	1437.49	1.12418	0.295855	3.79977	0.00014483	0.000634677	study5_a-Ketoglutarate_vs_Glu
1072	C2_04970W_A	700.632	1.17648	0.361402	3.25531	0.00113269	0.00392237	study5_a-Ketoglutarate_vs_Glu
1073	C1_06690W_A	553.805	1.28592	0.245846	5.2306	1.68964e-07	1.38339e-06	study5_a-Ketoglutarate_vs_Glu
1074	C7_02230W_A	163.863	3.6918	0.427874	8.62824	6.23047e-18	1.75968e-16	study5_a-Ketoglutarate_vs_Glu
1075	C3_07310C_A	29029.3	1.27132	0.213996	5.94088	2.83494e-09	3.01464e-08	study5_a-Ketoglutarate_vs_Glu
1076	C2_00610C_A	2820.6	1.55362	0.175399	8.85763	8.17342e-19	2.50367e-17	study5_a-Ketoglutarate_vs_Glu
1077	C2_04990W_A	534.016	-1.02411	0.229743	-4.45762	8.28751e-06	4.85964e-05	study5_a-Ketoglutarate_vs_Glu
1078	C1_00450C_A	2814.36	1.04722	0.185286	5.65188	1.58701e-08	1.51023e-07	study5_a-Ketoglutarate_vs_Glu
1079	C6_01180C_A	203.737	-2.61198	0.322122	-8.10868	5.11735e-16	1.18006e-14	study5_a-Ketoglutarate_vs_Glu
1080	C2_08050C_A	113.298	-2.09675	0.3102	-6.75934	1.38621e-11	1.95755e-10	study5_a-Ketoglutarate_vs_Glu
1081	C2_05500W_A	16022.9	1.22772	0.183262	6.69926	2.09473e-11	2.88529e-10	study5_a-Ketoglutarate_vs_Glu
1082	C2_00240C_A	1053.74	1.16755	0.406495	2.87224	0.00407576	0.0117865	study5_a-Ketoglutarate_vs_Glu
1083	C3_01140W_A	871.983	1.05999	0.198835	5.331	9.7676e-08	8.26087e-07	study5_a-Ketoglutarate_vs_Glu
1084	C2_04620W_A	8173.53	1.01953	0.14416	7.07223	1.52468e-12	2.4257e-11	study5_a-Ketoglutarate_vs_Glu
1085	C7_02420C_A	601.425	1.21343	0.171168	7.0891	1.34982e-12	2.18133e-11	study5_a-Ketoglutarate_vs_Glu
1086	C6_01880W_A	534.555	-1.1364	0.190619	-5.96159	2.49796e-09	2.68411e-08	study5_a-Ketoglutarate_vs_Glu
1087	C1_12470W_A	165.262	1.1387	0.376406	3.02519	0.00248477	0.00773835	study5_a-Ketoglutarate_vs_Glu
1088	C1_07880C_A	4107.68	1.86727	0.294351	6.34369	2.2433e-10	2.7903e-09	study5_a-Ketoglutarate_vs_Glu
1089	C3_07200C_A	1238.16	1.79325	0.219314	8.17662	2.91924e-16	6.99368e-15	study5_a-Ketoglutarate_vs_Glu
1090	C6_04050W_A	187.843	1.04594	0.263713	3.96621	7.30233e-05	0.000344789	study5_a-Ketoglutarate_vs_Glu
1091	C4_06710W_A	735.058	-1.00407	0.257156	-3.90451	9.44166e-05	0.000432532	study5_a-Ketoglutarate_vs_Glu
1092	C5_02080C_A	963.482	1.72562	0.348468	4.95201	7.34499e-07	5.37091e-06	study5_a-Ketoglutarate_vs_Glu
1093	C4_02210W_A	123.489	2.1063	0.467629	4.50422	6.66167e-06	4.00155e-05	study5_a-Ketoglutarate_vs_Glu
1094	C1_14030W_A	760.223	-1.25878	0.239799	-5.24931	1.52671e-07	1.25668e-06	study5_a-Ketoglutarate_vs_Glu
1095	C2_08170W_A	334.631	1.48297	0.351502	4.21895	2.45446e-05	0.000130136	study5_a-Ketoglutarate_vs_Glu
1096	C2_07420W_A	1613.32	-1.14279	0.181488	-6.2968	3.03855e-10	3.7342e-09	study5_a-Ketoglutarate_vs_Glu
1097	CR_06380C_A	526.425	-1.34486	0.306858	-4.38269	1.17222e-05	6.68314e-05	study5_a-Ketoglutarate_vs_Glu
1098	C1_07380C_A	1342.03	1.18104	0.192304	6.14156	8.1715e-10	9.38655e-09	study5_a-Ketoglutarate_vs_Glu
1099	C6_04310W_A	2280.97	2.64766	0.229374	11.543	8.01262e-31	5.54311e-29	study5_a-Ketoglutarate_vs_Glu
1100	C6_03210C_A	382.411	1.20105	0.255395	4.70273	2.56711e-06	1.67433e-05	study5_a-Ketoglutarate_vs_Glu
1101	C3_06100C_A	3570.63	1.04344	0.201068	5.18948	2.10884e-07	1.69256e-06	study5_a-Ketoglutarate_vs_Glu
1102	C3_02790W_A	383.31	3.65223	0.405712	9.00202	2.21599e-19	7.10617e-18	study5_a-Ketoglutarate_vs_Glu
1103	C1_12580W_A	1599.4	1.15077	0.202946	5.67032	1.42527e-08	1.37116e-07	study5_a-Ketoglutarate_vs_Glu
1104	C3_02560W_A	443.128	-1.05429	0.225587	-4.67354	2.96051e-06	1.91469e-05	study5_a-Ketoglutarate_vs_Glu
1105	C1_06550W_A	9070.68	1.46347	0.382584	3.82521	0.000130658	0.000580213	study5_a-Ketoglutarate_vs_Glu
1106	C1_07170C_A	1628.92	2.33833	0.243557	9.60078	7.93419e-22	2.94282e-20	study5_a-Ketoglutarate_vs_Glu
1107	C2_07040W_A	792.45	-1.0201	0.188384	-5.415	6.12874e-08	5.30727e-07	study5_a-Ketoglutarate_vs_Glu
1108	C2_04390W_A	65.5786	-1.23093	0.355959	-3.45806	0.000544071	0.0020526	study5_a-Ketoglutarate_vs_Glu
1109	C2_04280W_A	1160.53	3.52512	0.233074	15.1245	1.11629e-51	1.46234e-49	study5_a-Ketoglutarate_vs_Glu
1110	C4_03190W_A	1915.47	1.44585	0.242913	5.95211	2.64703e-09	2.82947e-08	study5_a-Ketoglutarate_vs_Glu
1111	C3_00220W_A	3277.23	2.64203	0.388018	6.80905	9.82434e-12	1.41992e-10	study5_a-Ketoglutarate_vs_Glu
1112	C2_08920W_A	2975.43	2.10908	0.297139	7.09798	1.26597e-12	2.06022e-11	study5_a-Ketoglutarate_vs_Glu
1113	C1_09240C_A	592.055	2.19051	0.433995	5.04731	4.48079e-07	3.39339e-06	study5_a-Ketoglutarate_vs_Glu
1114	C6_01670W_A	7669.52	1.58359	0.387883	4.08264	4.45262e-05	0.000223247	study5_a-Ketoglutarate_vs_Glu
1115	CR_05660W_A	2223.75	1.25369	0.440697	2.84478	0.00444415	0.0126855	study5_a-Ketoglutarate_vs_Glu
1116	C3_05160C_A	2064.96	1.36317	0.400594	3.40287	0.00066681	0.00246728	study5_a-Ketoglutarate_vs_Glu
1117	C1_13630W_A	4880.58	1.8214	0.303259	6.00611	1.90032e-09	2.06718e-08	study5_a-Ketoglutarate_vs_Glu
1118	C1_11310C_A	6802.42	1.90251	0.181524	10.4807	1.05901e-25	5.2583e-24	study5_a-Ketoglutarate_vs_Glu
1119	C7_00490C_A	338.745	-1.00391	0.383952	-2.61468	0.00893102	0.0230269	study5_a-Ketoglutarate_vs_Glu
1120	CR_03270W_A	2354.75	-4.11906	0.183265	-22.476	7.13363e-112	3.99289e-109	study5_a-Ketoglutarate_vs_Glu
1121	C2_04470W_A	190.873	1.4149	0.350467	4.0372	5.40936e-05	0.000264749	study5_a-Ketoglutarate_vs_Glu
1122	C6_00440C_A	7291.49	-1.15466	0.39882	-2.89519	0.00378927	0.0110933	study5_a-Ketoglutarate_vs_Glu
1123	C7_03490W_A	3799.68	1.29019	0.228469	5.6471	1.63177e-08	1.55044e-07	study5_a-Ketoglutarate_vs_Glu
1124	C3_04940W_A	2120.48	1.12998	0.148194	7.62503	2.43973e-14	4.72372e-13	study5_a-Ketoglutarate_vs_Glu
1125	C4_04030W_A	31364.8	10.4038	0.232495	44.7484	0	0	study5_a-Ketoglutarate_vs_Glu
1126	C6_02330W_A	15572.1	1.93678	0.199018	9.73169	2.20892e-22	8.6078e-21	study5_a-Ketoglutarate_vs_Glu
1127	CR_02220C_A	1191.13	1.30451	0.387351	3.36778	0.000757751	0.00275087	study5_a-Ketoglutarate_vs_Glu
1128	C4_03270W_A	2232.5	1.02222	0.355546	2.87507	0.00403942	0.0117039	study5_a-Ketoglutarate_vs_Glu
1129	C3_01040C_A	50.077	-1.36521	0.44606	-3.0606	0.00220896	0.00696393	study5_a-Ketoglutarate_vs_Glu
1130	C1_04040C_A	1652.12	1.60563	0.380773	4.21675	2.4785e-05	0.000131213	study5_a-Ketoglutarate_vs_Glu
1131	C1_12320C_A	4494.49	1.23218	0.183634	6.70994	1.94705e-11	2.71217e-10	study5_a-Ketoglutarate_vs_Glu
1132	CR_05010W_A	653.464	-1.04853	0.164325	-6.38081	1.76155e-10	2.20894e-09	study5_a-Ketoglutarate_vs_Glu
1133	C3_03650W_A	1756.26	1.3329	0.381157	3.49698	0.000470562	0.00180289	study5_a-Ketoglutarate_vs_Glu
1134	C5_04930C_A	2346.51	6.08398	0.366844	16.5846	9.00093e-62	1.67935e-59	study5_a-Ketoglutarate_vs_Glu
1135	CR_01790C_A	617.175	-1.08068	0.183493	-5.88948	3.87405e-09	4.03596e-08	study5_a-Ketoglutarate_vs_Glu
1136	C1_09150W_A	534.242	3.45752	0.388641	8.89644	5.7668e-19	1.79324e-17	study5_a-Ketoglutarate_vs_Glu
1137	CR_00600C_A	3001.67	1.66709	0.172638	9.65661	4.60865e-22	1.76245e-20	study5_a-Ketoglutarate_vs_Glu
1138	CR_07030C_A	502.668	1.00062	0.294387	3.399	0.000676324	0.00248753	study5_a-Ketoglutarate_vs_Glu
1139	C2_02670C_A	125.758	-1.52737	0.40106	-3.80834	0.000139903	0.000615299	study5_a-Ketoglutarate_vs_Glu
1140	C5_03780C_A	691.251	-1.41065	0.304353	-4.63492	3.57076e-06	2.2759e-05	study5_a-Ketoglutarate_vs_Glu
1141	C4_04160W_A	20669.6	3.80793	0.313528	12.1454	6.06902e-34	4.6132e-32	study5_a-Ketoglutarate_vs_Glu
1142	C4_05730W_A	287.267	1.55368	0.345744	4.49373	6.99859e-06	4.18759e-05	study5_a-Ketoglutarate_vs_Glu
1143	C2_10420W_A	158.571	-1.51975	0.344103	-4.41654	1.00292e-05	5.78182e-05	study5_a-Ketoglutarate_vs_Glu
1144	C3_05810C_A	392.08	1.31498	0.326171	4.03157	5.5406e-05	0.000270099	study5_a-Ketoglutarate_vs_Glu
1145	C1_05740C_A	246.978	-1.10972	0.271875	-4.08174	4.46993e-05	0.000223933	study5_a-Ketoglutarate_vs_Glu
1146	CR_08830W_A	4555.36	2.61618	0.441333	5.9279	3.06833e-09	3.25159e-08	study5_a-Ketoglutarate_vs_Glu
1147	C7_00510W_A	477.344	-1.19032	0.398012	-2.99066	0.00278373	0.00854408	study5_a-Ketoglutarate_vs_Glu
1148	CR_07270C_A	644.009	1.70253	0.24561	6.93185	4.15377e-12	6.37774e-11	study5_a-Ketoglutarate_vs_Glu
1149	C1_08080C_A	5006.87	2.19811	0.201071	10.932	8.10317e-28	4.79723e-26	study5_a-Ketoglutarate_vs_Glu
1150	C3_01640C_A	49.2113	1.93339	0.452682	4.27097	1.94626e-05	0.000105208	study5_a-Ketoglutarate_vs_Glu
1151	C1_09320C_A	3393.08	1.69204	0.152825	11.0717	1.72022e-28	1.09189e-26	study5_a-Ketoglutarate_vs_Glu
1152	C1_11890W_A	1741.68	1.54217	0.19623	7.85898	3.8728e-15	8.05568e-14	study5_a-Ketoglutarate_vs_Glu
1153	C2_07580W_A	371.528	-1.0405	0.287402	-3.62037	0.000294187	0.00119087	study5_a-Ketoglutarate_vs_Glu
1154	C2_04950C_A	12274.4	1.75464	0.230533	7.61123	2.71496e-14	5.20748e-13	study5_a-Ketoglutarate_vs_Glu
1155	C5_01490C_A	1328.44	1.08686	0.227358	4.78039	1.74957e-06	1.17728e-05	study5_a-Ketoglutarate_vs_Glu
1156	C2_02570W_A	445.835	-1.51379	0.320156	-4.72831	2.26399e-06	1.49244e-05	study5_a-Ketoglutarate_vs_Glu
1157	C3_07160W_A	879.474	1.91572	0.292959	6.53921	6.18445e-11	8.15901e-10	study5_a-Ketoglutarate_vs_Glu
1158	C3_06170C_A	69.0815	-1.66811	0.341264	-4.88805	1.01842e-06	7.20734e-06	study5_a-Ketoglutarate_vs_Glu
1159	CR_07530C_A	1482.43	1.02924	0.257413	3.9984	6.37718e-05	0.000306727	study5_a-Ketoglutarate_vs_Glu
1160	C3_03790W_A	1357.13	1.4868	0.287357	5.17404	2.29085e-07	1.82468e-06	study5_a-Ketoglutarate_vs_Glu
1161	C1_06610C_A	2342.08	3.27843	0.431197	7.60308	2.89175e-14	5.52935e-13	study5_a-Ketoglutarate_vs_Glu
1162	C5_05360C_A	1638.64	1.03487	0.25976	3.98394	6.77827e-05	0.000323267	study5_a-Ketoglutarate_vs_Glu
1163	C4_05580C_A	1190.2	9.87165	1.05226	9.38135	6.51317e-21	2.2529e-19	study5_a-Ketoglutarate_vs_Glu
1164	CR_06700C_A	2798.12	-1.06683	0.240019	-4.44478	8.79803e-06	5.12483e-05	study5_a-Ketoglutarate_vs_Glu
1165	CR_02390W_A	5068.79	1.09786	0.170285	6.44722	1.13923e-10	1.46015e-09	study5_a-Ketoglutarate_vs_Glu
1166	C4_04770C_A	1520.55	-2.45418	0.229267	-10.7045	9.69894e-27	5.14796e-25	study5_a-Ketoglutarate_vs_Glu
1167	C2_03760C_A	7374.07	1.23777	0.171955	7.19819	6.10178e-13	1.02647e-11	study5_a-Ketoglutarate_vs_Glu
1168	C3_04910C_A	9453.03	1.58822	0.29732	5.34179	9.20323e-08	7.82655e-07	study5_a-Ketoglutarate_vs_Glu
1169	C6_03840C_A	2293.46	1.46874	0.244312	6.01171	1.83575e-09	2.00403e-08	study5_a-Ketoglutarate_vs_Glu
1170	C5_04270C_A	9241.88	1.16994	0.37681	3.10485	0.00190376	0.00616917	study5_a-Ketoglutarate_vs_Glu
1171	CR_06860C_A	12007.1	-2.50948	0.251358	-9.98369	1.79662e-23	7.62881e-22	study5_a-Ketoglutarate_vs_Glu
1172	CR_03500W_A	13963.3	2.25703	0.400108	5.64105	1.69012e-08	1.59847e-07	study5_a-Ketoglutarate_vs_Glu
1173	C2_02980C_A	4417.13	-1.43138	0.246497	-5.80691	6.36353e-09	6.36043e-08	study5_a-Ketoglutarate_vs_Glu
1174	C1_14290C_A	23981.3	1.02456	0.205988	4.97392	6.56135e-07	4.83233e-06	study5_a-Ketoglutarate_vs_Glu
1175	C2_06260W_A	139.493	-1.09818	0.306877	-3.57856	0.000345496	0.00137407	study5_a-Ketoglutarate_vs_Glu
1176	C1_02390W_A	968.789	-1.12764	0.187422	-6.01659	1.78125e-09	1.94798e-08	study5_a-Ketoglutarate_vs_Glu
1177	C5_02430W_A	104.474	-1.15088	0.312822	-3.67903	0.00023412	0.000970036	study5_a-Ketoglutarate_vs_Glu
1178	CR_02510W_A	6805.91	1.97886	0.239088	8.27668	1.26655e-16	3.2091e-15	study5_a-Ketoglutarate_vs_Glu
1179	C1_07160C_A	21206.5	3.95054	1.2454	3.1721	0.00151342	0.0050532	study5_a-Ketoglutarate_vs_Glu
1180	C3_03360W_A	687.141	-2.79669	0.352223	-7.9401	2.02016e-15	4.34899e-14	study5_a-Ketoglutarate_vs_Glu
1181	C3_01960C_A	8069.84	1.46067	0.20197	7.23209	4.75609e-13	8.04872e-12	study5_a-Ketoglutarate_vs_Glu
1182	C4_06660W_A	123.487	-1.53184	0.286342	-5.34969	8.81062e-08	7.50304e-07	study5_a-Ketoglutarate_vs_Glu
1183	C4_01170C_A	140.812	2.83181	0.401105	7.06002	1.66478e-12	2.62822e-11	study5_a-Ketoglutarate_vs_Glu
1184	C6_00920W_A	3550.66	2.20881	0.242874	9.09448	9.50381e-20	3.18016e-18	study5_a-Ketoglutarate_vs_Glu
1185	C4_00450C_A	235.992	-3.81471	0.4047	-9.42603	4.25917e-21	1.48998e-19	study5_a-Ketoglutarate_vs_Glu
1186	C2_07160W_A	5368.37	2.09271	0.21788	9.60487	7.62522e-22	2.84536e-20	study5_a-Ketoglutarate_vs_Glu
1187	CR_03920C_A	1226.39	-2.01319	0.198764	-10.1286	4.12671e-24	1.802e-22	study5_a-Ketoglutarate_vs_Glu
1188	C4_06670W_A	1186.71	-1.65404	0.325508	-5.08141	3.74648e-07	2.87978e-06	study5_a-Ketoglutarate_vs_Glu
1189	C4_02100C_A	659.13	-1.57671	0.209673	-7.51986	5.4834e-14	1.02307e-12	study5_a-Ketoglutarate_vs_Glu
1190	C7_01650W_A	5351.93	-1.91329	0.150571	-12.7069	5.4111e-37	4.89943e-35	study5_a-Ketoglutarate_vs_Glu
1191	C2_06600W_A	13007.7	2.52326	0.231933	10.8793	1.44725e-27	8.48638e-26	study5_a-Ketoglutarate_vs_Glu
1192	C7_03740C_A	109.733	3.23484	0.583065	5.54799	2.88964e-08	2.65149e-07	study5_a-Ketoglutarate_vs_Glu
1193	C3_01850W_A	1468.67	1.12199	0.29266	3.83376	0.0001262	0.000563621	study5_a-Ketoglutarate_vs_Glu
1194	C1_02980W_A	2563.09	-2.56102	0.328135	-7.80477	5.96091e-15	1.22747e-13	study5_a-Ketoglutarate_vs_Glu
1195	C1_14120C_A	3358.32	1.00907	0.287819	3.50593	0.000455018	0.00175097	study5_a-Ketoglutarate_vs_Glu
1196	C3_02720W_A	924.345	1.08345	0.225402	4.80675	1.53406e-06	1.04367e-05	study5_a-Ketoglutarate_vs_Glu
1197	C1_02530C_A	12726	1.7723	0.281608	6.2935	3.10393e-10	3.80298e-09	study5_a-Ketoglutarate_vs_Glu
1198	C1_11630C_A	54.1345	1.42129	0.407112	3.49115	0.000480939	0.00183922	study5_a-Ketoglutarate_vs_Glu
1199	C3_04000C_A	7585.76	5.0125	0.385165	13.0139	1.01987e-38	9.9672e-37	study5_a-Ketoglutarate_vs_Glu
1200	C1_05140W_A	7898.93	1.85892	0.482982	3.84885	0.000118673	0.00053217	study5_a-Ketoglutarate_vs_Glu
1201	CR_04120C_A	748.264	-1.19383	0.263032	-4.53874	5.65919e-06	3.44987e-05	study5_a-Ketoglutarate_vs_Glu
1202	C4_02930W_A	4777.78	2.74112	0.408536	6.70961	1.95142e-11	2.71217e-10	study5_a-Ketoglutarate_vs_Glu
1203	C4_02230C_A	203.595	4.62831	0.538169	8.6001	7.96446e-18	2.18916e-16	study5_a-Ketoglutarate_vs_Glu
1204	C1_10820C_A	2664.89	-1.10287	0.261811	-4.21248	2.5258e-05	0.000133488	study5_a-Ketoglutarate_vs_Glu
1205	CR_00330C_A	3422.21	2.66663	0.215845	12.3543	4.61493e-35	3.7387e-33	study5_a-Ketoglutarate_vs_Glu
1206	C5_02460C_A	605.572	-2.64832	0.413684	-6.40179	1.53565e-10	1.93354e-09	study5_a-Ketoglutarate_vs_Glu
1207	C2_05060C_A	225.444	-1.23504	0.29809	-4.1432	3.425e-05	0.000175878	study5_a-Ketoglutarate_vs_Glu
1208	C6_01780C_A	811.379	1.20531	0.31008	3.8871	0.000101447	0.000460288	study5_a-Ketoglutarate_vs_Glu
1209	C6_02660C_A	182.38	1.39192	0.331215	4.20246	2.6403e-05	0.000138824	study5_a-Ketoglutarate_vs_Glu
1210	CR_06260W_A	633.462	-1.22092	0.241739	-5.05057	4.40498e-07	3.35247e-06	study5_a-Ketoglutarate_vs_Glu
1211	C4_01070W_A	53529	10.7371	0.263215	40.7922	0	0	study5_a-Ketoglutarate_vs_Glu
1212	CR_03390C_A	874.005	-1.10335	0.226498	-4.87134	1.10841e-06	7.78361e-06	study5_a-Ketoglutarate_vs_Glu
1213	C5_02590C_A	534.045	1.76231	0.491071	3.58871	0.000332316	0.00132689	study5_a-Ketoglutarate_vs_Glu
1214	C1_11520C_A	2673.87	-1.85029	0.306992	-6.02717	1.66852e-09	1.83448e-08	study5_a-Ketoglutarate_vs_Glu
1215	C3_07340W_A	2945.01	-1.59516	0.234612	-6.79916	1.05231e-11	1.51027e-10	study5_a-Ketoglutarate_vs_Glu
1216	CR_06580W_A	6.81126	2.93358	1.12462	2.6085	0.0090941	0.0233594	study5_a-Ketoglutarate_vs_Glu
1217	C4_03930C_A	895.201	1.0519	0.193371	5.4398	5.33402e-08	4.68496e-07	study5_a-Ketoglutarate_vs_Glu
1218	CR_02100C_A	728.5	-1.02975	0.230729	-4.46305	8.08027e-06	4.76079e-05	study5_a-Ketoglutarate_vs_Glu
1219	C1_04390C_A	2700.95	1.25087	0.35393	3.53424	0.000408956	0.00159162	study5_a-Ketoglutarate_vs_Glu
1220	C5_02630C_A	1858.42	-1.0924	0.299591	-3.6463	0.000266047	0.00109349	study5_a-Ketoglutarate_vs_Glu
1221	C2_10450W_A	542.794	-1.48221	0.222258	-6.66885	2.57817e-11	3.51969e-10	study5_a-Ketoglutarate_vs_Glu
1222	C6_02990W_A	850.75	-1.56777	0.278558	-5.62817	1.82131e-08	1.71728e-07	study5_a-Ketoglutarate_vs_Glu
1223	C3_01270W_A	43.4232	-2.9042	0.618408	-4.69624	2.64988e-06	1.72284e-05	study5_a-Ketoglutarate_vs_Glu
1224	C3_04720C_A	783.924	-1.07733	0.197867	-5.44471	5.18912e-08	4.5642e-07	study5_a-Ketoglutarate_vs_Glu
1225	CR_02550C_A	882.508	1.22124	0.285838	4.27249	1.93305e-05	0.000104677	study5_a-Ketoglutarate_vs_Glu
1226	C6_00810C_A	67.8296	1.98331	0.518787	3.82296	0.000131858	0.000584905	study5_a-Ketoglutarate_vs_Glu
1227	C5_04190W_A	120.363	1.97614	0.469151	4.21217	2.52934e-05	0.00013356	study5_a-Ketoglutarate_vs_Glu
1228	C7_01620C_A	685.857	-1.15452	0.269008	-4.29178	1.7725e-05	9.70069e-05	study5_a-Ketoglutarate_vs_Glu
1229	CR_00020W_A	3255.91	-1.132	0.180049	-6.28721	3.23221e-10	3.93295e-09	study5_a-Ketoglutarate_vs_Glu
1230	C2_01960C_A	186.799	1.72138	0.344213	5.00092	5.70569e-07	4.25302e-06	study5_a-Ketoglutarate_vs_Glu
1231	C1_01130W_A	4965.26	1.57469	0.286976	5.48719	4.08367e-08	3.63866e-07	study5_a-Ketoglutarate_vs_Glu
1232	CR_08210C_A	30583.6	3.73143	0.348585	10.7045	9.69238e-27	5.14796e-25	study5_a-Ketoglutarate_vs_Glu
1233	C5_00180W_A	4003.61	1.01026	0.292742	3.45104	0.000558433	0.00210304	study5_a-Ketoglutarate_vs_Glu
1234	C7_00350C_A	24592.3	2.19301	0.905794	2.42109	0.0154741	0.0367995	study5_a-Ketoglutarate_vs_Glu
1235	C2_00860C_A	316.399	-5.63381	0.427165	-13.1888	1.01753e-39	1.06185e-37	study5_a-Ketoglutarate_vs_Glu
1236	C6_00470C_A	897.249	-4.52238	0.98441	-4.594	4.3483e-06	2.70976e-05	study5_a-Ketoglutarate_vs_Glu
1237	C4_03380C_A	1377.5	-1.22902	0.33349	-3.68533	0.000228409	0.000949571	study5_a-Ketoglutarate_vs_Glu
1238	CR_00530W_A	162.917	4.98287	0.492237	10.1229	4.37183e-24	1.89559e-22	study5_a-Ketoglutarate_vs_Glu
1239	C5_04830W_A	2010.19	1.04297	0.180219	5.78721	7.15667e-09	7.10703e-08	study5_a-Ketoglutarate_vs_Glu
1240	C2_04230W_A	2162.24	-2.34685	0.334201	-7.02229	2.18267e-12	3.41084e-11	study5_a-Ketoglutarate_vs_Glu
1241	CR_05050W_A	28269.9	1.43648	0.179269	8.01302	1.11922e-15	2.4788e-14	study5_a-Ketoglutarate_vs_Glu
1242	C1_02040C_A	3402.17	1.0584	0.307753	3.43912	0.000583608	0.00219102	study5_a-Ketoglutarate_vs_Glu
1243	C2_05620W_A	76.5114	-1.19956	0.33282	-3.60424	0.000313071	0.00126151	study5_a-Ketoglutarate_vs_Glu
1244	C1_08570C_A	732.226	-1.26534	0.358982	-3.52479	0.000423815	0.00164425	study5_a-Ketoglutarate_vs_Glu
1245	C4_02410C_A	21465.2	-3.69222	0.332779	-11.0951	1.3248e-28	8.49666e-27	study5_a-Ketoglutarate_vs_Glu
1246	C5_03490C_A	1150.68	-1.25644	0.236436	-5.31406	1.0721e-07	8.98083e-07	study5_a-Ketoglutarate_vs_Glu
1247	C2_01660C_A	2026.96	1.09632	0.258822	4.23582	2.27722e-05	0.000121709	study5_a-Ketoglutarate_vs_Glu
1248	CR_02620C_A	3148.62	1.7515	0.209805	8.34825	6.92839e-17	1.78486e-15	study5_a-Ketoglutarate_vs_Glu
1249	C1_00520W_A	785.763	-1.1427	0.218825	-5.22199	1.7701e-07	1.44542e-06	study5_a-Ketoglutarate_vs_Glu
1250	CR_01920W_A	525.276	-7.56918	0.386124	-19.603	1.4584e-85	4.48969e-83	study5_a-Ketoglutarate_vs_Glu
1251	CR_02240C_A	164.262	1.44411	0.445692	3.24016	0.00119462	0.00411139	study5_a-Ketoglutarate_vs_Glu
1252	C1_03760C_A	2531.69	-1.13295	0.217084	-5.21895	1.79942e-07	1.46161e-06	study5_a-Ketoglutarate_vs_Glu
1253	C7_01010W_A	84.0673	1.02148	0.334572	3.05308	0.00226504	0.00712613	study5_a-Ketoglutarate_vs_Glu
1254	C3_06060W_A	1374.54	1.38911	0.27529	5.046	4.51159e-07	3.41252e-06	study5_a-Ketoglutarate_vs_Glu
1255	C1_07870C_A	13353.5	1.10001	0.261317	4.20947	2.55975e-05	0.000134935	study5_a-Ketoglutarate_vs_Glu
1256	C1_08130C_A	809.002	-1.10806	0.212202	-5.22174	1.77246e-07	1.44543e-06	study5_a-Ketoglutarate_vs_Glu
1257	C4_03350C_A	819.834	1.33045	0.279314	4.76328	1.90467e-06	1.27468e-05	study5_a-Ketoglutarate_vs_Glu
1258	C3_06330W_A	15.2912	-2.05546	0.669623	-3.06959	0.00214356	0.00680177	study5_a-Ketoglutarate_vs_Glu
1259	C2_02030W_A	8354.61	-1.0593	0.373097	-2.8392	0.00452273	0.0128799	study5_a-Ketoglutarate_vs_Glu
1260	C1_12850W_A	18250.2	4.48465	0.508165	8.82519	1.09272e-18	3.29797e-17	study5_a-Ketoglutarate_vs_Glu
1261	C5_04180W_A	414.279	1.16269	0.424005	2.74216	0.0061036	0.0166487	study5_a-Ketoglutarate_vs_Glu
1262	C4_05870C_A	35.3358	5.81325	1.09764	5.29615	1.18268e-07	9.8669e-07	study5_a-Ketoglutarate_vs_Glu
1263	CR_02180W_A	388.997	-1.05058	0.326237	-3.22029	0.0012806	0.00435616	study5_a-Ketoglutarate_vs_Glu
1264	C1_04470C_A	332.431	-3.04246	0.316098	-9.62503	6.26866e-22	2.36375e-20	study5_a-Ketoglutarate_vs_Glu
1265	C3_02310W_A	524.822	-1.40821	0.260167	-5.41272	6.20736e-08	5.3678e-07	study5_a-Ketoglutarate_vs_Glu
1266	C2_04550C_A	7200.16	2.67249	0.282838	9.44881	3.42689e-21	1.21261e-19	study5_a-Ketoglutarate_vs_Glu
1267	C1_03750W_A	1404.8	-4.13431	0.24169	-17.1058	1.34344e-65	2.75719e-63	study5_a-Ketoglutarate_vs_Glu
1268	C1_03680W_A	4889.5	1.28944	0.314729	4.097	4.18542e-05	0.000210881	study5_a-Ketoglutarate_vs_Glu
1269	C1_02210W_A	6231.96	1.05466	0.295292	3.57159	0.000354826	0.00140583	study5_a-Ketoglutarate_vs_Glu
1270	C3_00050C_A	64.0708	-1.74791	0.360535	-4.84809	1.24653e-06	8.64288e-06	study5_a-Ketoglutarate_vs_Glu
1271	C2_05360C_A	452.869	1.0693	0.339228	3.15216	0.00162067	0.00536766	study5_a-Ketoglutarate_vs_Glu
1272	C2_02850W_A	54.5166	-2.40351	0.432587	-5.55612	2.75833e-08	2.53478e-07	study5_a-Ketoglutarate_vs_Glu
1273	C2_04080W_A	4354.05	1.46798	0.305514	4.80496	1.54783e-06	1.05089e-05	study5_a-Ketoglutarate_vs_Glu
1274	C1_06750W_A	385.038	-1.51228	0.300657	-5.02992	4.90686e-07	3.68884e-06	study5_a-Ketoglutarate_vs_Glu
1275	CR_07580C_A	618.276	-1.17477	0.219223	-5.35882	8.37677e-08	7.15337e-07	study5_a-Ketoglutarate_vs_Glu
1276	CR_08920W_A	2280.75	1.26036	0.288541	4.36805	1.25362e-05	7.11385e-05	study5_a-Ketoglutarate_vs_Glu
1277	C1_02970W_A	4132.14	-2.21084	0.254972	-8.67092	4.28643e-18	1.23325e-16	study5_a-Ketoglutarate_vs_Glu
1278	C3_06950W_A	617.351	1.65935	0.286884	5.78403	7.29303e-09	7.21916e-08	study5_a-Ketoglutarate_vs_Glu
1279	C1_02700C_A	2670.21	1.56362	0.374315	4.17729	2.95003e-05	0.000153703	study5_a-Ketoglutarate_vs_Glu
1280	C5_01800C_A	3529.2	1.13792	0.316381	3.59668	0.000322311	0.00129281	study5_a-Ketoglutarate_vs_Glu
1281	C3_06920W_A	2065.84	-2.11678	0.207381	-10.2072	1.84129e-24	8.15601e-23	study5_a-Ketoglutarate_vs_Glu
1282	C2_05070W_A	239.254	-2.5428	0.43394	-5.85981	4.63395e-09	4.73941e-08	study5_a-Ketoglutarate_vs_Glu
1283	C6_03620C_A	1066.11	-1.44431	0.179818	-8.03208	9.58343e-16	2.14564e-14	study5_a-Ketoglutarate_vs_Glu
1284	CR_05680C_A	372.985	1.03994	0.323329	3.21635	0.0012983	0.00440908	study5_a-Ketoglutarate_vs_Glu
1285	C1_03790C_A	5351.71	1.33782	0.455006	2.94022	0.00327976	0.00982172	study5_a-Ketoglutarate_vs_Glu
1286	C3_01090W_A	1490.97	2.07795	0.262279	7.92265	2.32502e-15	4.91929e-14	study5_a-Ketoglutarate_vs_Glu
1287	C7_00660W_A	7043.35	2.21299	0.350816	6.30811	2.82455e-10	3.48512e-09	study5_a-Ketoglutarate_vs_Glu
1288	C1_10930C_A	781.753	-1.21163	0.19633	-6.17136	6.77034e-10	7.87995e-09	study5_a-Ketoglutarate_vs_Glu
1289	C4_05000W_A	277.738	-1.68245	0.28704	-5.86137	4.59059e-09	4.70288e-08	study5_a-Ketoglutarate_vs_Glu
1290	C4_00060W_A	664.462	-1.30898	0.212581	-6.15757	7.38689e-10	8.53303e-09	study5_a-Ketoglutarate_vs_Glu
1291	C7_02430C_A	139.355	1.41723	0.304162	4.65946	3.17035e-06	2.03544e-05	study5_a-Ketoglutarate_vs_Glu
1292	C4_04020C_A	3809.74	10.9066	0.622212	17.5288	8.63652e-69	1.89911e-66	study5_a-Ketoglutarate_vs_Glu
1293	CR_04470W_A	310.714	-1.00586	0.212022	-4.7441	2.09431e-06	1.39252e-05	study5_a-Ketoglutarate_vs_Glu
1294	C4_02020W_A	6339.08	2.59133	0.179514	14.4352	3.10645e-47	3.82529e-45	study5_a-Ketoglutarate_vs_Glu
1295	C1_07580C_A	288.544	3.8622	0.462752	8.34616	7.05192e-17	1.80911e-15	study5_a-Ketoglutarate_vs_Glu
1296	C1_13110C_A	3385.58	1.01748	0.1952	5.21251	1.86299e-07	1.50728e-06	study5_a-Ketoglutarate_vs_Glu
1297	C6_03400C_A	8856.76	1.60452	0.203231	7.89505	2.90202e-15	6.0982e-14	study5_a-Ketoglutarate_vs_Glu
1298	C1_07420C_A	1158.31	1.16396	0.157953	7.36908	1.71814e-13	3.00528e-12	study5_a-Ketoglutarate_vs_Glu
1299	C1_14480W_A	323.905	-1.38872	0.266908	-5.20302	1.9608e-07	1.58226e-06	study5_a-Ketoglutarate_vs_Glu
1300	C1_00680W_A	374.004	-1.27188	0.213322	-5.96222	2.48836e-09	2.67847e-08	study5_a-Ketoglutarate_vs_Glu
1301	C4_04540C_A	33.0727	1.61306	0.50595	3.18817	0.00143175	0.00480135	study5_a-Ketoglutarate_vs_Glu
1302	C4_02500C_A	2537.59	2.49568	0.320088	7.79688	6.34588e-15	1.29376e-13	study5_a-Ketoglutarate_vs_Glu
1303	CR_07820W_A	171.26	1.39941	0.278685	5.02149	5.12721e-07	3.84042e-06	study5_a-Ketoglutarate_vs_Glu
1304	C3_03990C_A	360.26	3.59338	0.296135	12.1343	6.95348e-34	5.22104e-32	study5_a-Ketoglutarate_vs_Glu
1305	C2_01010W_A	10021.3	2.09545	0.349605	5.99375	2.05051e-09	2.22271e-08	study5_a-Ketoglutarate_vs_Glu
1306	C2_01510C_A	332.601	-1.19174	0.236102	-5.04756	4.47477e-07	3.393e-06	study5_a-Ketoglutarate_vs_Glu
1307	C5_01600C_A	882.4	1.00417	0.382747	2.62359	0.00870086	0.0225468	study5_a-Ketoglutarate_vs_Glu
1308	C2_10590W_A	7530.39	1.06026	0.366667	2.89161	0.00383278	0.0112	study5_a-Ketoglutarate_vs_Glu
1309	C5_03580C_A	656.548	-1.2038	0.192817	-6.24322	4.28665e-10	5.15486e-09	study5_a-Ketoglutarate_vs_Glu
1310	C6_03480W_A	280.562	-2.1531	0.443326	-4.85669	1.19363e-06	8.33238e-06	study5_a-Ketoglutarate_vs_Glu
1311	C2_04050C_A	9167.53	1.71792	0.362312	4.74154	2.12097e-06	1.40569e-05	study5_a-Ketoglutarate_vs_Glu
1312	C4_05250W_A	133.429	-2.4992	0.361547	-6.91253	4.76073e-12	7.21966e-11	study5_a-Ketoglutarate_vs_Glu
1313	CR_08540C_A	2545.89	1.14048	0.200772	5.68049	1.34312e-08	1.29415e-07	study5_a-Ketoglutarate_vs_Glu
1314	C1_00170W_A	3892.36	1.41034	0.380956	3.70209	0.000213829	0.000893178	study5_a-Ketoglutarate_vs_Glu
1315	C3_07280C_A	4023.75	-1.91647	0.269133	-7.1209	1.07226e-12	1.75582e-11	study5_a-Ketoglutarate_vs_Glu
1316	C1_02630C_A	289.826	-1.46503	0.268816	-5.44994	5.0386e-08	4.43815e-07	study5_a-Ketoglutarate_vs_Glu
1317	C2_06720W_A	884.476	1.10465	0.223377	4.94521	7.60603e-07	5.52897e-06	study5_a-Ketoglutarate_vs_Glu
1318	C2_06730W_A	13621.6	1.06564	0.228321	4.66728	3.05219e-06	1.96732e-05	study5_a-Ketoglutarate_vs_Glu
1319	CR_08690C_A	2217.73	1.77359	0.245843	7.2143	5.42104e-13	9.14448e-12	study5_a-Ketoglutarate_vs_Glu
1320	C4_05700W_A	718.935	5.94958	0.359135	16.5664	1.21884e-61	2.20717e-59	study5_a-Ketoglutarate_vs_Glu
1321	C1_09580C_A	134.132	1.30705	0.42466	3.07788	0.00208478	0.00665078	study5_a-Ketoglutarate_vs_Glu
1322	C1_01220C_A	3229.27	2.32518	0.395867	5.87365	4.26304e-09	4.40394e-08	study5_a-Ketoglutarate_vs_Glu
1323	C1_13840W_A	2855.13	1.32111	0.213889	6.17662	6.5488e-10	7.65103e-09	study5_a-Ketoglutarate_vs_Glu
1324	C1_08240C_A	405.975	-2.08154	0.270928	-7.68302	1.55387e-14	3.10622e-13	study5_a-Ketoglutarate_vs_Glu
1325	CR_02070C_A	26534.8	2.09785	0.536819	3.90793	9.30887e-05	0.000426766	study5_a-Ketoglutarate_vs_Glu
1326	C1_08580C_A	1305.03	1.53695	0.174452	8.81017	1.24956e-18	3.75294e-17	study5_a-Ketoglutarate_vs_Glu
1327	CR_04930W_A	3623.16	1.09696	0.185825	5.90321	3.56503e-09	3.73934e-08	study5_a-Ketoglutarate_vs_Glu
1328	CR_09060W_A	332.861	1.10355	0.272356	4.05187	5.08103e-05	0.000251075	study5_a-Ketoglutarate_vs_Glu
1329	CR_00150C_A	4462.07	1.53236	0.188363	8.13514	4.11471e-16	9.62989e-15	study5_a-Ketoglutarate_vs_Glu
1330	C1_03720C_A	2058.02	1.1969	0.211641	5.65536	1.55521e-08	1.48456e-07	study5_a-Ketoglutarate_vs_Glu
1331	C1_04610W_A	41073.9	1.58199	0.221351	7.14697	8.87169e-13	1.46442e-11	study5_a-Ketoglutarate_vs_Glu
1332	C1_08370W_A	14137.4	2.32517	0.347024	6.70032	2.07965e-11	2.87094e-10	study5_a-Ketoglutarate_vs_Glu
1333	C3_05640W_A	4.63582	3.5773	1.49607	2.39113	0.0167967	0.03952	study5_a-Ketoglutarate_vs_Glu
1334	C3_01470W_A	1311.38	-1.15448	0.270494	-4.26804	1.97195e-05	0.000106428	study5_a-Ketoglutarate_vs_Glu
1335	CR_01330W_A	4345.3	2.58754	0.415605	6.22596	4.78613e-10	5.67789e-09	study5_a-Ketoglutarate_vs_Glu
1336	C1_14430C_A	1193.07	-1.14798	0.248818	-4.61373	3.95501e-06	2.48793e-05	study5_a-Ketoglutarate_vs_Glu
1337	C1_12100C_A	1446.26	2.52452	0.204959	12.3172	7.32312e-35	5.85565e-33	study5_a-Ketoglutarate_vs_Glu
1338	C2_07280W_A	52.2253	-3.43006	0.569803	-6.01972	1.7472e-09	1.91415e-08	study5_a-Ketoglutarate_vs_Glu
1339	C4_02010C_A	328.335	-1.295	0.325966	-3.9728	7.10322e-05	0.000336678	study5_a-Ketoglutarate_vs_Glu
1340	C2_07840W_A	19.6715	3.44127	0.87232	3.94496	7.98136e-05	0.000371438	study5_a-Ketoglutarate_vs_Glu
1341	CR_00310C_A	3726.5	1.28364	0.424993	3.02038	0.00252462	0.00783076	study5_a-Ketoglutarate_vs_Glu
1342	C3_00810C_A	9362.76	2.65724	0.246687	10.7717	4.6811e-27	2.62014e-25	study5_a-Ketoglutarate_vs_Glu
1343	C1_13330C_A	4071.26	1.11071	0.229867	4.83197	1.35185e-06	9.33112e-06	study5_a-Ketoglutarate_vs_Glu
1344	C2_08430C_A	29.7806	-2.05714	0.554477	-3.71006	0.000207211	0.00086907	study5_a-Ketoglutarate_vs_Glu
1345	CR_10580W_A	3224.07	-1.85889	0.189537	-9.80751	1.04511e-22	4.17842e-21	study5_a-Ketoglutarate_vs_Glu
1346	C3_02650W_A	93.0035	1.62665	0.323179	5.03328	4.82158e-07	3.6336e-06	study5_a-Ketoglutarate_vs_Glu
1347	C1_06870C_A	524.183	-7.83902	0.456531	-17.1708	4.39e-66	9.32041e-64	study5_a-Ketoglutarate_vs_Glu
1348	CR_09920W_A	4261.07	3.3809	0.486594	6.94809	3.70253e-12	5.74218e-11	study5_a-Ketoglutarate_vs_Glu
1349	C4_00110C_A	1971.23	1.63682	0.260514	6.28302	3.32048e-10	4.03239e-09	study5_a-Ketoglutarate_vs_Glu
1350	C1_03390W_A	4113.95	-2.68691	0.163109	-16.4731	5.72352e-61	9.78881e-59	study5_a-Ketoglutarate_vs_Glu
1351	CR_09530C_A	5428.85	1.40978	0.301735	4.67224	2.97933e-06	1.92484e-05	study5_a-Ketoglutarate_vs_Glu
1352	C7_03930C_A	4591.33	1.3099	0.214783	6.09873	1.06912e-09	1.21003e-08	study5_a-Ketoglutarate_vs_Glu
1353	C3_03440C_A	567.414	-1.63693	0.324883	-5.03852	4.69135e-07	3.54413e-06	study5_a-Ketoglutarate_vs_Glu
1354	CR_00080W_A	4097.64	-1.69072	0.369946	-4.57017	4.87318e-06	3.00643e-05	study5_a-Ketoglutarate_vs_Glu
1355	C1_07860W_A	194.333	-1.01556	0.381262	-2.66369	0.00772899	0.0203626	study5_a-Ketoglutarate_vs_Glu
1356	C4_01200C_A	1941.48	1.23154	0.319187	3.85837	0.000114147	0.000513372	study5_a-Ketoglutarate_vs_Glu
1357	C4_02080W_A	80.5235	1.22652	0.487486	2.51601	0.0118693	0.0294318	study5_a-Ketoglutarate_vs_Glu
1358	C1_13130C_A	1352.33	-3.46976	0.274348	-12.6473	1.15759e-36	1.00384e-34	study5_a-Ketoglutarate_vs_Glu
1359	C1_07080W_A	1526.68	2.13255	0.342476	6.22686	4.75878e-10	5.65634e-09	study5_a-Ketoglutarate_vs_Glu
1360	C5_02220C_A	921.057	1.07478	0.239823	4.48157	7.40969e-06	4.41641e-05	study5_a-Ketoglutarate_vs_Glu
1361	C3_02290W_A	975.152	1.05134	0.265416	3.9611	7.4604e-05	0.000351175	study5_a-Ketoglutarate_vs_Glu
1362	C1_01040W_A	767.676	-1.08487	0.267774	-4.05143	5.09046e-05	0.000251339	study5_a-Ketoglutarate_vs_Glu
1363	C3_00320W_A	22040.9	-2.27294	0.306213	-7.42274	1.14719e-13	2.05925e-12	study5_a-Ketoglutarate_vs_Glu
1364	C6_04180W_A	1949.74	1.74339	0.192166	9.07231	1.16525e-19	2.847e-18	study5_Casamino_acid_vs_Glu
1365	C5_03480C_A	849.106	-1.69519	0.264159	-6.41732	1.38693e-10	1.47995e-09	study5_Casamino_acid_vs_Glu
1366	CR_01470W_A	18796.6	2.14765	0.246724	8.70464	3.18586e-18	7.05588e-17	study5_Casamino_acid_vs_Glu
1367	CR_00300W_A	122.347	2.3002	0.505343	4.55175	5.32012e-06	2.85083e-05	study5_Casamino_acid_vs_Glu
1368	CR_05340C_A	14714.5	3.47251	1.04352	3.3277	0.000875655	0.00282273	study5_Casamino_acid_vs_Glu
1369	C6_02210W_A	167.716	-3.22703	0.325663	-9.90911	3.80026e-23	1.21866e-21	study5_Casamino_acid_vs_Glu
1370	C1_01990W_A	81.24	5.54486	0.528601	10.4897	9.63379e-26	3.68418e-24	study5_Casamino_acid_vs_Glu
1371	C3_02910W_A	13.3696	1.96018	0.693409	2.82688	0.0047004	0.0125542	study5_Casamino_acid_vs_Glu
1372	C2_09120C_A	90.6746	2.73479	0.359607	7.60494	2.85038e-14	4.39845e-13	study5_Casamino_acid_vs_Glu
1373	C2_03080W_A	10726.4	1.56945	0.313955	4.99896	5.76402e-07	3.69678e-06	study5_Casamino_acid_vs_Glu
1374	CR_07920W_A	4485.91	1.80413	0.236845	7.61735	2.5893e-14	4.01569e-13	study5_Casamino_acid_vs_Glu
1375	C4_00440C_A	955.895	-3.59938	0.355513	-10.1245	4.30287e-24	1.48004e-22	study5_Casamino_acid_vs_Glu
1376	C1_04760C_A	1401.39	-2.09767	0.258939	-8.10104	5.44898e-16	1.01052e-14	study5_Casamino_acid_vs_Glu
1377	C5_04580C_A	359.659	-1.02735	0.209557	-4.9025	9.46251e-07	5.83774e-06	study5_Casamino_acid_vs_Glu
1378	C4_06380W_A	28.3916	2.73956	0.619325	4.42346	9.71322e-06	4.92622e-05	study5_Casamino_acid_vs_Glu
1379	CR_00610W_A	704.35	2.19278	0.250961	8.73753	2.38257e-18	5.33435e-17	study5_Casamino_acid_vs_Glu
1380	CR_08870W_A	2570.77	2.00036	0.164044	12.194	3.34452e-34	1.8892e-32	study5_Casamino_acid_vs_Glu
1381	CR_00930W_A	3865.76	8.16137	0.600539	13.5901	4.58529e-42	3.44288e-40	study5_Casamino_acid_vs_Glu
1382	C3_04510W_A	854.988	-1.76075	0.232992	-7.55711	4.12135e-14	6.23468e-13	study5_Casamino_acid_vs_Glu
1383	C5_00540C_A	722.277	10.0062	1.50165	6.66344	2.67483e-11	3.08985e-10	study5_Casamino_acid_vs_Glu
1384	C1_04900W_A	1070.44	-1.95726	0.212268	-9.22069	2.95183e-20	7.54125e-19	study5_Casamino_acid_vs_Glu
1385	CR_10140W_A	8547.83	2.5521	0.24002	10.6329	2.09514e-26	8.32244e-25	study5_Casamino_acid_vs_Glu
1386	C2_10240W_A	2532.19	-2.92945	0.219421	-13.3508	1.17217e-40	8.49064e-39	study5_Casamino_acid_vs_Glu
1387	CR_09570W_A	845.507	1.88553	0.268305	7.02754	2.10214e-12	2.71339e-11	study5_Casamino_acid_vs_Glu
1388	C1_05000W_A	1370.66	-2.10174	0.343378	-6.12078	9.31182e-10	8.91647e-09	study5_Casamino_acid_vs_Glu
1389	C4_07150W_A	172.842	-1.80324	0.451581	-3.99318	6.51934e-05	0.000277975	study5_Casamino_acid_vs_Glu
1390	C5_01070C_A	2708.44	-1.00441	0.244845	-4.10223	4.0919e-05	0.000181512	study5_Casamino_acid_vs_Glu
1391	C7_01070C_A	3443.31	1.62353	0.233178	6.96265	3.33924e-12	4.21305e-11	study5_Casamino_acid_vs_Glu
1392	C1_00350C_A	2464.5	1.43998	0.323225	4.45505	8.38733e-06	4.3034e-05	study5_Casamino_acid_vs_Glu
1393	CR_06660W_A	3591.47	-2.35238	0.349147	-6.7375	1.61131e-11	1.90419e-10	study5_Casamino_acid_vs_Glu
1394	C2_08650W_A	3865.76	1.3887	0.188054	7.38455	1.52973e-13	2.18528e-12	study5_Casamino_acid_vs_Glu
1395	C1_03940W_A	7444.33	1.6872	0.208539	8.09056	5.93914e-16	1.09812e-14	study5_Casamino_acid_vs_Glu
1396	CR_05730C_A	3867.2	1.88253	0.365473	5.15093	2.59193e-07	1.74601e-06	study5_Casamino_acid_vs_Glu
1397	C1_01440C_A	150.87	2.57271	0.357892	7.1885	6.55061e-13	8.80614e-12	study5_Casamino_acid_vs_Glu
1398	C1_10800C_A	2355.68	-2.91063	0.339603	-8.57071	1.02853e-17	2.16935e-16	study5_Casamino_acid_vs_Glu
1399	C3_06900W_A	1566.46	1.4343	0.162809	8.80967	1.25511e-18	2.87275e-17	study5_Casamino_acid_vs_Glu
1400	C1_07980C_A	1688.98	2.75287	0.401329	6.85939	6.91531e-12	8.51551e-11	study5_Casamino_acid_vs_Glu
1401	C2_06590C_A	655.562	1.35051	0.293967	4.59409	4.3465e-06	2.37668e-05	study5_Casamino_acid_vs_Glu
1402	C7_04180W_A	2588.97	2.14601	0.22673	9.46507	2.93374e-21	8.06384e-20	study5_Casamino_acid_vs_Glu
1403	C2_04400W_A	7872.72	-1.44596	0.265353	-5.44919	5.06004e-08	3.80399e-07	study5_Casamino_acid_vs_Glu
1404	C2_04170C_A	6752.59	1.46954	0.186615	7.8747	3.41552e-15	5.73006e-14	study5_Casamino_acid_vs_Glu
1405	C7_02840C_A	7186.8	-1.22481	0.152816	-8.01492	1.10208e-15	1.96681e-14	study5_Casamino_acid_vs_Glu
1406	C7_02270W_A	66.4076	-1.97404	0.62963	-3.13523	0.00171719	0.00512741	study5_Casamino_acid_vs_Glu
1407	CR_01060W_A	2386.74	-1.50162	0.262247	-5.72598	1.02841e-08	8.69768e-08	study5_Casamino_acid_vs_Glu
1408	C3_02920W_A	2403.91	1.34689	0.241775	5.57086	2.53486e-08	1.9958e-07	study5_Casamino_acid_vs_Glu
1409	CR_01930C_A	4624.36	-3.69738	0.174835	-21.1478	2.89259e-99	1.36998e-96	study5_Casamino_acid_vs_Glu
1410	C2_09150W_A	5234.09	-1.29567	0.298229	-4.34455	1.3956e-05	6.86865e-05	study5_Casamino_acid_vs_Glu
1411	C5_01670W_A	77.9493	1.0786	0.361162	2.98649	0.00282202	0.00796662	study5_Casamino_acid_vs_Glu
1412	CR_02770C_A	1806.17	-1.00445	0.168098	-5.97536	2.29585e-09	2.07266e-08	study5_Casamino_acid_vs_Glu
1413	C2_01750C_A	5478.19	1.52962	0.270988	5.6446	1.65566e-08	1.33954e-07	study5_Casamino_acid_vs_Glu
1414	C2_01890W_A	1458.17	1.00855	0.354535	2.84471	0.00444513	0.0119357	study5_Casamino_acid_vs_Glu
1415	C3_07760C_A	393.12	1.86446	0.266233	7.00313	2.50311e-12	3.21076e-11	study5_Casamino_acid_vs_Glu
1416	C2_01970C_A	1136.88	-1.80528	0.315302	-5.72555	1.03096e-08	8.70733e-08	study5_Casamino_acid_vs_Glu
1417	C2_06940C_A	1060.97	-1.13043	0.18529	-6.10087	1.05494e-09	1.00081e-08	study5_Casamino_acid_vs_Glu
1418	C2_09630C_A	135.89	-1.7654	0.290553	-6.07601	1.23211e-09	1.15642e-08	study5_Casamino_acid_vs_Glu
1419	C7_01510W_A	6052.83	5.05868	0.375533	13.4707	2.3271e-41	1.70571e-39	study5_Casamino_acid_vs_Glu
1420	C6_00970C_A	1308.47	-1.10805	0.303436	-3.65166	0.000260551	0.000958885	study5_Casamino_acid_vs_Glu
1421	C2_01390W_A	3740.26	1.01437	0.177898	5.702	1.18409e-08	9.7858e-08	study5_Casamino_acid_vs_Glu
1422	C1_13550C_A	1666.15	1.01776	0.22159	4.59298	4.36967e-06	2.38723e-05	study5_Casamino_acid_vs_Glu
1423	CR_01300W_A	2549.76	1.63389	0.241744	6.75875	1.39187e-11	1.6608e-10	study5_Casamino_acid_vs_Glu
1424	C5_00640C_A	2158.73	1.57265	0.211663	7.42998	1.08614e-13	1.5735e-12	study5_Casamino_acid_vs_Glu
1425	C1_02810W_A	1574.37	-1.05008	0.207271	-5.0662	4.05846e-07	2.65546e-06	study5_Casamino_acid_vs_Glu
1426	C2_02600C_A	186.904	2.54895	0.315221	8.08623	6.15381e-16	1.1344e-14	study5_Casamino_acid_vs_Glu
1427	C3_07070C_A	2112.74	3.28604	0.326288	10.071	7.42219e-24	2.48361e-22	study5_Casamino_acid_vs_Glu
1428	CR_01570W_A	343.885	-1.00287	0.239609	-4.18543	2.84621e-05	0.000132258	study5_Casamino_acid_vs_Glu
1429	C3_03710W_A	1070.08	1.61054	0.263085	6.12176	9.25485e-10	8.87571e-09	study5_Casamino_acid_vs_Glu
1430	C3_04080W_A	9066.42	1.58027	0.242744	6.51005	7.51234e-11	8.33396e-10	study5_Casamino_acid_vs_Glu
1431	CR_10380C_A	1479.83	-1.13537	0.291541	-3.89438	9.84509e-05	0.000401166	study5_Casamino_acid_vs_Glu
1432	C1_04460C_A	1242.07	2.49205	0.352646	7.06672	1.58642e-12	2.07379e-11	study5_Casamino_acid_vs_Glu
1433	C3_00720W_A	10516.8	-1.28934	0.20226	-6.37464	1.83392e-10	1.94011e-09	study5_Casamino_acid_vs_Glu
1434	C1_12890W_A	295.599	1.00743	0.295353	3.41094	0.000647403	0.00216047	study5_Casamino_acid_vs_Glu
1435	C1_12570C_A	1767.96	1.20488	0.178363	6.7552	1.42641e-11	1.69873e-10	study5_Casamino_acid_vs_Glu
1436	CR_01600C_A	309.14	-1.1815	0.35734	-3.30638	0.000945088	0.00302438	study5_Casamino_acid_vs_Glu
1437	C2_06710W_A	464.786	1.59636	0.229827	6.94591	3.76018e-12	4.73444e-11	study5_Casamino_acid_vs_Glu
1438	C1_02270C_A	2295.02	4.23775	0.206396	20.5321	1.11172e-93	3.60255e-91	study5_Casamino_acid_vs_Glu
1439	C5_02890W_A	10433.9	1.13127	0.244627	4.62447	3.7555e-06	2.08604e-05	study5_Casamino_acid_vs_Glu
1440	C2_05460W_A	111914	-4.34182	0.276477	-15.7041	1.41845e-55	1.6173e-53	study5_Casamino_acid_vs_Glu
1441	C5_01260W_A	186.804	2.28619	0.402457	5.68057	1.34244e-08	1.10205e-07	study5_Casamino_acid_vs_Glu
1442	C7_01100C_A	637.398	-1.4631	0.339566	-4.30875	1.6418e-05	8.02906e-05	study5_Casamino_acid_vs_Glu
1443	C4_03990C_A	270.865	-1.15655	0.356998	-3.23966	0.00119672	0.0037232	study5_Casamino_acid_vs_Glu
1444	C5_01730W_A	290.344	-1.1425	0.372001	-3.07122	0.00213188	0.00620029	study5_Casamino_acid_vs_Glu
1445	CR_01860W_A	56.5299	1.19107	0.449659	2.64883	0.00807703	0.0201174	study5_Casamino_acid_vs_Glu
1446	C2_05250C_A	18756.6	2.23816	0.347953	6.43237	1.25632e-10	1.35077e-09	study5_Casamino_acid_vs_Glu
1447	C1_13470W_A	1065.91	1.43725	0.22707	6.32953	2.45913e-10	2.55757e-09	study5_Casamino_acid_vs_Glu
1448	C7_01750W_A	542.838	2.81715	0.250455	11.2481	2.36582e-29	1.09522e-27	study5_Casamino_acid_vs_Glu
1449	CR_05940W_A	45.8652	2.4797	0.412111	6.01706	1.77608e-09	1.63458e-08	study5_Casamino_acid_vs_Glu
1450	C2_08700C_A	1587.97	1.23547	0.204626	6.03769	1.56333e-09	1.44743e-08	study5_Casamino_acid_vs_Glu
1451	C2_06300W_A	743.662	1.2183	0.196999	6.18431	6.23743e-10	6.16434e-09	study5_Casamino_acid_vs_Glu
1452	C6_01720C_A	8307.91	1.36658	0.220963	6.18465	6.22403e-10	6.16099e-09	study5_Casamino_acid_vs_Glu
1453	C2_10100W_A	501.286	1.14625	0.288698	3.97042	7.17462e-05	0.000301736	study5_Casamino_acid_vs_Glu
1454	C6_00250W_A	2820.89	1.28875	0.224586	5.73834	9.56074e-09	8.10819e-08	study5_Casamino_acid_vs_Glu
1455	C2_09080C_A	4.0441	4.65639	1.81051	2.57186	0.0101153	0.024539	study5_Casamino_acid_vs_Glu
1456	C1_09550W_A	145.842	-1.48035	0.480031	-3.08386	0.00204333	0.00597945	study5_Casamino_acid_vs_Glu
1457	C5_05240C_A	44.4325	2.26861	0.470162	4.82517	1.39883e-06	8.44387e-06	study5_Casamino_acid_vs_Glu
1458	CR_03110W_A	744.859	-1.04415	0.270447	-3.86084	0.000112996	0.000453532	study5_Casamino_acid_vs_Glu
1459	C4_02200C_A	595.904	1.86954	0.246962	7.57016	3.72772e-14	5.68108e-13	study5_Casamino_acid_vs_Glu
1460	C2_00480C_A	1212.6	1.88791	0.4528	4.16941	3.05386e-05	0.000140738	study5_Casamino_acid_vs_Glu
1461	C1_04360C_A	9352.98	1.68082	0.265368	6.33394	2.38982e-10	2.49392e-09	study5_Casamino_acid_vs_Glu
1462	C2_02550C_A	159.191	-1.39011	0.417362	-3.3307	0.000866264	0.00280125	study5_Casamino_acid_vs_Glu
1463	C6_02620C_A	35.5005	1.96253	0.721362	2.7206	0.00651642	0.0166618	study5_Casamino_acid_vs_Glu
1464	C5_00450C_A	3889.14	1.03266	0.369088	2.79788	0.00514398	0.0135638	study5_Casamino_acid_vs_Glu
1465	C3_00920W_A	5518.34	10.7522	0.519471	20.6984	3.58086e-95	1.22485e-92	study5_Casamino_acid_vs_Glu
1466	C7_02490W_A	1949.92	1.05175	0.195994	5.36625	8.03908e-08	5.91357e-07	study5_Casamino_acid_vs_Glu
1467	C2_08340C_A	103.781	2.95926	0.472669	6.26075	3.83127e-10	3.88618e-09	study5_Casamino_acid_vs_Glu
1468	C2_09060C_A	13714.1	-1.18598	0.257646	-4.60313	4.16198e-06	2.28389e-05	study5_Casamino_acid_vs_Glu
1469	C5_03330C_A	1465.31	1.32977	0.161384	8.23979	1.72517e-16	3.29871e-15	study5_Casamino_acid_vs_Glu
1470	C4_03960W_A	1396.12	-1.51119	0.458797	-3.2938	0.000988416	0.00314181	study5_Casamino_acid_vs_Glu
1471	CR_08340W_A	10375.4	-2.17774	0.457671	-4.7583	1.95228e-06	1.14806e-05	study5_Casamino_acid_vs_Glu
1472	C1_10140C_A	1694.79	1.63365	0.297865	5.48452	4.146e-08	3.16319e-07	study5_Casamino_acid_vs_Glu
1473	C1_13250W_A	1761.9	1.66577	0.243445	6.84251	7.7819e-12	9.54445e-11	study5_Casamino_acid_vs_Glu
1474	CR_02000C_A	3367.97	-1.38261	0.243891	-5.66896	1.43664e-08	1.17158e-07	study5_Casamino_acid_vs_Glu
1475	C4_06390W_A	1442.46	1.2821	0.358117	3.58011	0.000343449	0.00122943	study5_Casamino_acid_vs_Glu
1476	C3_03870C_A	3711.65	1.37762	0.257076	5.35878	8.37843e-08	6.13389e-07	study5_Casamino_acid_vs_Glu
1477	C3_07700W_A	878.161	-1.5075	0.226417	-6.65805	2.7748e-11	3.19933e-10	study5_Casamino_acid_vs_Glu
1478	C2_09640W_A	5039.3	-1.59343	0.191822	-8.30681	9.83132e-17	1.92775e-15	study5_Casamino_acid_vs_Glu
1479	C4_00130W_A	35511.8	1.64024	0.305347	5.37171	7.79931e-08	5.74406e-07	study5_Casamino_acid_vs_Glu
1480	CR_07280W_A	169.948	1.32547	0.335716	3.94819	7.87459e-05	0.000328037	study5_Casamino_acid_vs_Glu
1481	C4_06540W_A	4646.94	1.70427	0.207659	8.20704	2.26701e-16	4.30802e-15	study5_Casamino_acid_vs_Glu
1482	CR_09140C_A	4902.3	2.05158	0.400955	5.11673	3.10879e-07	2.06928e-06	study5_Casamino_acid_vs_Glu
1483	C2_02880C_A	775.478	-1.95248	0.300691	-6.49331	8.39725e-11	9.26556e-10	study5_Casamino_acid_vs_Glu
1484	C1_14590C_A	1356.64	-1.36616	0.244235	-5.59361	2.22401e-08	1.76459e-07	study5_Casamino_acid_vs_Glu
1485	C2_10050W_A	6684.71	1.00404	0.150367	6.67724	2.43488e-11	2.82859e-10	study5_Casamino_acid_vs_Glu
1486	C2_00510W_A	777.642	1.45027	0.263671	5.5003	3.7914e-08	2.91068e-07	study5_Casamino_acid_vs_Glu
1487	C1_11200W_A	14996.5	1.58794	0.337712	4.70205	2.57559e-06	1.48343e-05	study5_Casamino_acid_vs_Glu
1488	C4_00380W_A	1009.55	-1.29835	0.247565	-5.24448	1.56727e-07	1.0978e-06	study5_Casamino_acid_vs_Glu
1489	CR_02750C_A	236.288	1.91105	0.443852	4.30561	1.66524e-05	8.13077e-05	study5_Casamino_acid_vs_Glu
1490	CR_06490C_A	13583.2	1.29812	0.372047	3.48914	0.00048458	0.001664	study5_Casamino_acid_vs_Glu
1491	C2_03470C_A	16716.8	1.30173	0.245485	5.30268	1.14115e-07	8.22726e-07	study5_Casamino_acid_vs_Glu
1492	CR_01590C_A	4745.55	-1.40328	0.265667	-5.2821	1.27713e-07	9.10106e-07	study5_Casamino_acid_vs_Glu
1493	C7_01900W_A	6322.28	2.13322	0.233212	9.14709	5.84866e-20	1.46383e-18	study5_Casamino_acid_vs_Glu
1494	C2_06070W_A	2691.92	2.93403	0.220721	13.2929	2.54405e-40	1.77997e-38	study5_Casamino_acid_vs_Glu
1495	C3_02850C_A	496.418	-1.13463	0.252545	-4.4928	7.02944e-06	3.66779e-05	study5_Casamino_acid_vs_Glu
1496	C3_01930W_A	8358.94	8.45879	0.301194	28.0842	1.52912e-173	2.3537e-170	study5_Casamino_acid_vs_Glu
1497	C3_05650W_A	7214.94	1.11017	0.302231	3.67324	0.000239494	0.000890438	study5_Casamino_acid_vs_Glu
1498	C2_00400C_A	5699.69	2.41968	0.222525	10.8737	1.53796e-27	6.57585e-26	study5_Casamino_acid_vs_Glu
1499	C2_03570C_A	239.098	1.49487	0.225288	6.63535	3.23732e-11	3.71177e-10	study5_Casamino_acid_vs_Glu
1500	C1_10730W_A	1872.22	1.09357	0.173591	6.29969	2.9825e-10	3.06054e-09	study5_Casamino_acid_vs_Glu
1501	C1_00270W_A	78.2648	-2.59035	0.520104	-4.98045	6.34361e-07	4.04742e-06	study5_Casamino_acid_vs_Glu
1502	C4_01300W_A	10013.4	2.05746	0.240059	8.57067	1.02883e-17	2.16935e-16	study5_Casamino_acid_vs_Glu
1503	C3_02940C_A	5132.18	1.62112	0.211775	7.65494	1.93408e-14	3.02237e-13	study5_Casamino_acid_vs_Glu
1504	CR_10790W_A	1687.39	3.30164	0.362793	9.1006	8.98331e-20	2.21241e-18	study5_Casamino_acid_vs_Glu
1505	C1_02890C_A	746.556	1.23491	0.271728	4.54465	5.50271e-06	2.93589e-05	study5_Casamino_acid_vs_Glu
1506	C6_03800C_A	3565.61	-1.09813	0.250451	-4.38463	1.16183e-05	5.82049e-05	study5_Casamino_acid_vs_Glu
1507	C6_03670C_A	153.076	1.2191	0.313238	3.89191	9.94584e-05	0.000405004	study5_Casamino_acid_vs_Glu
1508	C1_12160W_A	2299.65	1.75265	0.240545	7.28614	3.18973e-13	4.43322e-12	study5_Casamino_acid_vs_Glu
1509	C1_01750W_A	984.816	-1.54954	0.251635	-6.15788	7.37248e-10	7.20513e-09	study5_Casamino_acid_vs_Glu
1510	C3_06450W_A	1323.56	4.50888	0.247878	18.19	6.19918e-74	1.41364e-71	study5_Casamino_acid_vs_Glu
1511	CR_06150C_A	13364.7	2.3538	0.389314	6.04603	1.48456e-09	1.38282e-08	study5_Casamino_acid_vs_Glu
1512	C1_13670W_A	9563.81	6.17676	0.377563	16.3596	3.71789e-60	5.0869e-58	study5_Casamino_acid_vs_Glu
1513	C4_04720W_A	3389.58	1.31958	0.477602	2.76292	0.00572868	0.0148762	study5_Casamino_acid_vs_Glu
1514	CR_07070C_A	7207.49	1.64628	0.50224	3.27787	0.00104594	0.00330588	study5_Casamino_acid_vs_Glu
1515	C3_01320C_A	1968.17	2.48243	0.287088	8.64694	5.29005e-18	1.15911e-16	study5_Casamino_acid_vs_Glu
1516	C6_03690W_A	825.315	-1.36559	0.177742	-7.68295	1.55462e-14	2.45431e-13	study5_Casamino_acid_vs_Glu
1517	CR_07010W_A	12046	1.13933	0.372838	3.05583	0.00224438	0.00650289	study5_Casamino_acid_vs_Glu
1518	CR_02190C_A	2504.1	-1.36285	0.224252	-6.07731	1.22212e-09	1.14879e-08	study5_Casamino_acid_vs_Glu
1519	C3_05770C_A	565.473	-1.03981	0.319829	-3.25116	0.00114934	0.00359944	study5_Casamino_acid_vs_Glu
1520	C1_08350C_A	21765	2.59091	0.928584	2.79017	0.00526798	0.0138611	study5_Casamino_acid_vs_Glu
1521	C5_05430W_A	1128.63	2.83372	0.335711	8.44093	3.14829e-17	6.33464e-16	study5_Casamino_acid_vs_Glu
1522	C6_00940C_A	237.196	-2.40103	0.400213	-5.99938	1.98077e-09	1.80676e-08	study5_Casamino_acid_vs_Glu
1523	C5_05480W_A	3733.63	-1.53235	0.321706	-4.7632	1.90546e-06	1.1216e-05	study5_Casamino_acid_vs_Glu
1524	C3_03420C_A	15686.3	-1.24938	0.299074	-4.1775	2.94732e-05	0.00013593	study5_Casamino_acid_vs_Glu
1525	C6_01460C_A	1529.89	-1.09862	0.243167	-4.51797	6.24368e-06	3.28567e-05	study5_Casamino_acid_vs_Glu
1526	C3_06290W_A	2310.15	1.03914	0.181758	5.71714	1.08331e-08	9.07472e-08	study5_Casamino_acid_vs_Glu
1527	C4_04900W_A	14470.9	-1.18338	0.163561	-7.23514	4.65053e-13	6.37712e-12	study5_Casamino_acid_vs_Glu
1528	C6_02980C_A	5419.01	1.1449	0.15245	7.50997	5.91391e-14	8.81646e-13	study5_Casamino_acid_vs_Glu
1529	C2_09140C_A	7457.37	-1.3085	0.358286	-3.65212	0.000260084	0.000957738	study5_Casamino_acid_vs_Glu
1530	C3_04930C_A	2424.34	2.75254	0.220849	12.4634	1.18207e-35	7.06605e-34	study5_Casamino_acid_vs_Glu
1531	C3_00310C_A	491.315	-1.17461	0.243443	-4.82497	1.40023e-06	8.44387e-06	study5_Casamino_acid_vs_Glu
1532	C4_02900C_A	2631.01	1.31596	0.501298	2.6251	0.00866244	0.0213938	study5_Casamino_acid_vs_Glu
1533	C7_02170C_A	2083.95	1.05204	0.196513	5.35352	8.62574e-08	6.28505e-07	study5_Casamino_acid_vs_Glu
1534	C2_04000C_A	105.504	3.00828	0.772096	3.89625	9.76946e-05	0.000398348	study5_Casamino_acid_vs_Glu
1535	C1_12250C_A	2841.8	1.4139	0.329605	4.28966	1.78944e-05	8.66844e-05	study5_Casamino_acid_vs_Glu
1536	C5_05300W_A	2984.9	1.02074	0.235869	4.32758	1.50759e-05	7.40208e-05	study5_Casamino_acid_vs_Glu
1537	C2_06290C_A	7455.11	1.25566	0.191653	6.55175	5.68649e-11	6.389e-10	study5_Casamino_acid_vs_Glu
1538	C2_06570C_A	15521.5	-1.10066	0.428867	-2.56645	0.0102746	0.0248763	study5_Casamino_acid_vs_Glu
1539	C2_01000W_A	30650.8	-4.62867	0.818832	-5.65277	1.57879e-08	1.28241e-07	study5_Casamino_acid_vs_Glu
1540	C3_07360W_A	847.228	-3.11444	0.248732	-12.5213	5.711e-36	3.51626e-34	study5_Casamino_acid_vs_Glu
1541	C1_11260C_A	104.873	1.26615	0.456828	2.77161	0.00557796	0.01454	study5_Casamino_acid_vs_Glu
1542	C2_08660C_A	334.354	1.60486	0.259628	6.18137	6.35494e-10	6.27041e-09	study5_Casamino_acid_vs_Glu
1543	C2_08100W_A	3261.9	-1.17865	0.225179	-5.23427	1.65641e-07	1.14977e-06	study5_Casamino_acid_vs_Glu
1544	C3_07060W_A	6800.24	1.56751	0.224689	6.97633	3.02987e-12	3.85411e-11	study5_Casamino_acid_vs_Glu
1545	CR_09210W_A	1477.61	2.72037	0.216052	12.5913	2.35861e-36	1.48183e-34	study5_Casamino_acid_vs_Glu
1546	C6_02450W_A	863.413	2.71476	0.507278	5.35162	8.71723e-08	6.34421e-07	study5_Casamino_acid_vs_Glu
1547	C5_04490C_A	11498	5.02501	0.260236	19.3094	4.47462e-83	1.19784e-80	study5_Casamino_acid_vs_Glu
1548	C7_02140W_A	87.7429	-2.23527	0.441584	-5.06195	4.14993e-07	2.70956e-06	study5_Casamino_acid_vs_Glu
1549	C5_01400W_A	424.229	2.54779	0.404336	6.30118	2.95397e-10	3.03632e-09	study5_Casamino_acid_vs_Glu
1550	C1_13860C_A	40784.8	-1.09521	0.241697	-4.53132	5.86161e-06	3.10051e-05	study5_Casamino_acid_vs_Glu
1551	C1_11790W_A	529.045	-1.22984	0.274465	-4.48085	7.4345e-06	3.84657e-05	study5_Casamino_acid_vs_Glu
1552	C1_04870W_A	25.4621	-1.87221	0.535993	-3.49297	0.000477673	0.00164212	study5_Casamino_acid_vs_Glu
1553	C1_02140C_A	10.352	-2.08779	0.787984	-2.64953	0.00806034	0.0200973	study5_Casamino_acid_vs_Glu
1554	C2_07760W_A	1124.21	-1.03601	0.237512	-4.36194	1.28915e-05	6.3856e-05	study5_Casamino_acid_vs_Glu
1555	CR_07420W_A	15516.4	2.81389	0.201421	13.9702	2.37024e-44	1.92021e-42	study5_Casamino_acid_vs_Glu
1556	C1_05150C_A	32.0967	2.38766	0.597127	3.99859	6.37223e-05	0.000272079	study5_Casamino_acid_vs_Glu
1557	C1_02480W_A	3471.21	-1.2177	0.247176	-4.92643	8.37441e-07	5.23464e-06	study5_Casamino_acid_vs_Glu
1558	C5_00660C_A	5178.95	-2.02928	0.216082	-9.39125	5.92934e-21	1.60118e-19	study5_Casamino_acid_vs_Glu
1559	C7_02610C_A	2457.25	-3.00296	0.351289	-8.54839	1.24814e-17	2.61388e-16	study5_Casamino_acid_vs_Glu
1560	C5_03600W_A	2414.28	1.59725	0.446067	3.58075	0.000342615	0.00122787	study5_Casamino_acid_vs_Glu
1561	C1_13940W_A	6256.12	-1.71155	0.192042	-8.9124	4.99394e-19	1.1826e-17	study5_Casamino_acid_vs_Glu
1562	C4_04400C_A	649.293	5.70909	0.340942	16.7451	6.153e-63	9.47101e-61	study5_Casamino_acid_vs_Glu
1563	C7_01380W_A	130.776	-1.59174	0.383238	-4.15339	3.27585e-05	0.000149063	study5_Casamino_acid_vs_Glu
1564	C3_00850C_A	24055.3	1.57756	0.231078	6.82697	8.67278e-12	1.0553e-10	study5_Casamino_acid_vs_Glu
1565	C4_00720W_A	261.375	-1.73848	0.306542	-5.67127	1.41743e-08	1.15744e-07	study5_Casamino_acid_vs_Glu
1566	CR_07140C_A	357.709	1.38562	0.420994	3.29131	0.000997234	0.0031682	study5_Casamino_acid_vs_Glu
1567	C5_05230C_A	20595.3	1.72638	0.275231	6.27248	3.55344e-10	3.62228e-09	study5_Casamino_acid_vs_Glu
1568	CR_04740C_A	6499.55	1.02742	0.414178	2.48063	0.013115	0.0306797	study5_Casamino_acid_vs_Glu
1569	C6_03850C_A	4760.78	3.98079	0.401777	9.90795	3.84441e-23	1.22643e-21	study5_Casamino_acid_vs_Glu
1570	C1_05370C_A	1572.01	1.06662	0.245403	4.34638	1.38401e-05	6.81706e-05	study5_Casamino_acid_vs_Glu
1571	CR_10170C_A	2026.81	1.29573	0.288808	4.48648	7.2411e-06	3.75598e-05	study5_Casamino_acid_vs_Glu
1572	C1_09810W_A	556.766	-1.46627	0.182623	-8.02896	9.83053e-16	1.76978e-14	study5_Casamino_acid_vs_Glu
1573	C5_04130C_A	13949.2	2.06174	0.406914	5.06678	4.04597e-07	2.65011e-06	study5_Casamino_acid_vs_Glu
1574	CR_00620C_A	9079.2	-4.32886	0.537452	-8.05441	7.98636e-16	1.45911e-14	study5_Casamino_acid_vs_Glu
1575	C2_10160W_A	246.765	-1.84833	0.218762	-8.44903	2.93737e-17	5.92964e-16	study5_Casamino_acid_vs_Glu
1576	C4_01690C_A	3175.87	-1.30994	0.287553	-4.55548	5.22672e-06	2.80811e-05	study5_Casamino_acid_vs_Glu
1577	C1_06810W_A	19820.9	5.25607	0.318111	16.5228	2.51583e-61	3.52044e-59	study5_Casamino_acid_vs_Glu
1578	C1_10610W_A	1072.81	-1.53973	0.342478	-4.49586	6.92901e-06	3.61862e-05	study5_Casamino_acid_vs_Glu
1579	C4_00960W_A	1651.38	1.20372	0.253095	4.75599	1.97481e-06	1.15909e-05	study5_Casamino_acid_vs_Glu
1580	C2_04670W_A	138.156	1.82002	0.418607	4.34779	1.37515e-05	6.78081e-05	study5_Casamino_acid_vs_Glu
1581	CR_08880C_A	48.6398	3.20158	0.741739	4.31632	1.58652e-05	7.76484e-05	study5_Casamino_acid_vs_Glu
1582	C1_13410W_A	1680.03	1.75621	0.158563	11.0758	1.64422e-28	7.33582e-27	study5_Casamino_acid_vs_Glu
1583	C1_11760C_A	2346.26	1.53939	0.148143	10.3912	2.71874e-25	1.00839e-23	study5_Casamino_acid_vs_Glu
1584	C1_01630W_A	3440.25	2.25513	0.305666	7.37774	1.60997e-13	2.29457e-12	study5_Casamino_acid_vs_Glu
1585	C1_14470W_A	1073.47	-1.10712	0.247708	-4.46948	7.84116e-06	4.04677e-05	study5_Casamino_acid_vs_Glu
1586	C5_03130W_A	3426.37	1.95181	0.418789	4.66061	3.15273e-06	1.77273e-05	study5_Casamino_acid_vs_Glu
1587	C1_07600W_A	3944.95	1.78093	0.231468	7.69407	1.42524e-14	2.26749e-13	study5_Casamino_acid_vs_Glu
1588	C1_03150C_A	1718.07	1.41164	0.19191	7.35574	1.89868e-13	2.69358e-12	study5_Casamino_acid_vs_Glu
1589	C1_12910W_A	1214.98	-4.72005	0.488916	-9.65412	4.7218e-22	1.35851e-20	study5_Casamino_acid_vs_Glu
1590	C1_05890W_A	1583.93	6.56384	0.506462	12.9602	2.05809e-38	1.37736e-36	study5_Casamino_acid_vs_Glu
1591	C2_03710W_A	22.5725	3.14891	0.988233	3.1864	0.00144055	0.00439954	study5_Casamino_acid_vs_Glu
1592	C2_00920W_A	639.684	1.54882	0.241055	6.42518	1.31712e-10	1.41035e-09	study5_Casamino_acid_vs_Glu
1593	CR_08700C_A	1699.91	1.55604	0.337649	4.60845	4.05676e-06	2.23813e-05	study5_Casamino_acid_vs_Glu
1594	C6_02040W_A	14108.1	1.36375	0.143129	9.52815	1.60116e-21	4.48107e-20	study5_Casamino_acid_vs_Glu
1595	CR_01200W_A	413.659	2.02391	0.273037	7.41258	1.23865e-13	1.78186e-12	study5_Casamino_acid_vs_Glu
1596	C7_03280C_A	4837.32	4.20852	0.298246	14.1109	3.25273e-45	2.67027e-43	study5_Casamino_acid_vs_Glu
1597	C3_06980W_A	510.759	-1.14963	0.204007	-5.63523	1.74827e-08	1.40707e-07	study5_Casamino_acid_vs_Glu
1598	C4_02730C_A	7.19815	2.45338	1.07711	2.27774	0.0227419	0.0494429	study5_Casamino_acid_vs_Glu
1599	C1_01980W_A	9721.58	4.46524	0.357261	12.4985	7.60397e-36	4.63541e-34	study5_Casamino_acid_vs_Glu
1600	C6_04420W_A	4433.75	-1.63692	0.268168	-6.10408	1.03396e-09	9.84366e-09	study5_Casamino_acid_vs_Glu
1601	CR_08250C_A	29892.3	1.9828	0.52511	3.77597	0.000159384	0.000617574	study5_Casamino_acid_vs_Glu
1602	C6_03370W_A	28095.7	4.06422	0.263795	15.4067	1.47482e-53	1.5656e-51	study5_Casamino_acid_vs_Glu
1603	C1_05180C_A	1661.79	1.42628	0.217379	6.56127	5.33515e-11	6.01622e-10	study5_Casamino_acid_vs_Glu
1604	C2_03520C_A	23571.8	1.48204	0.200909	7.37667	1.62293e-13	2.3077e-12	study5_Casamino_acid_vs_Glu
1605	CR_08670C_A	1343.01	3.28625	0.308176	10.6635	1.50757e-26	6.02733e-25	study5_Casamino_acid_vs_Glu
1606	C3_00210C_A	392.315	1.6603	0.246447	6.73695	1.61748e-11	1.90782e-10	study5_Casamino_acid_vs_Glu
1607	C7_00930W_A	25830.2	1.56606	0.385704	4.06025	4.90202e-05	0.000214817	study5_Casamino_acid_vs_Glu
1608	CR_02580W_A	862.163	-1.03084	0.234167	-4.40217	1.07172e-05	5.39383e-05	study5_Casamino_acid_vs_Glu
1609	CR_06670W_A	131.39	4.27372	1.01461	4.2122	2.52898e-05	0.000119317	study5_Casamino_acid_vs_Glu
1610	C2_08140C_A	6327.25	1.08936	0.239582	4.54692	5.44356e-06	2.90685e-05	study5_Casamino_acid_vs_Glu
1611	CR_09190C_A	927.503	1.55508	0.187981	8.27252	1.31152e-16	2.55538e-15	study5_Casamino_acid_vs_Glu
1612	C2_07300C_A	320.528	-1.16489	0.396319	-2.93926	0.00328992	0.00914907	study5_Casamino_acid_vs_Glu
1613	C2_01760C_A	209.813	1.1379	0.234606	4.85025	1.23303e-06	7.50916e-06	study5_Casamino_acid_vs_Glu
1614	C3_01420C_A	3101.85	1.57248	0.234398	6.7086	1.965e-11	2.29574e-10	study5_Casamino_acid_vs_Glu
1615	CR_07060C_A	2976.08	-3.10084	0.286613	-10.8189	2.80159e-27	1.18961e-25	study5_Casamino_acid_vs_Glu
1616	C3_07980C_A	342.112	-1.2228	0.288181	-4.24317	2.20379e-05	0.000105103	study5_Casamino_acid_vs_Glu
1617	C5_03060C_A	932.244	1.24076	0.436058	2.84539	0.00443567	0.0119155	study5_Casamino_acid_vs_Glu
1618	C4_00980C_A	39.4445	1.41066	0.536289	2.6304	0.00852837	0.021105	study5_Casamino_acid_vs_Glu
1619	C3_05630W_A	173.927	3.44482	0.626643	5.49726	3.85741e-08	2.95767e-07	study5_Casamino_acid_vs_Glu
1620	C4_05540W_A	3098.19	-3.88896	0.493391	-7.88209	3.21939e-15	5.4158e-14	study5_Casamino_acid_vs_Glu
1621	C6_01030W_A	2000.35	-1.17094	0.341201	-3.4318	0.000599581	0.00201838	study5_Casamino_acid_vs_Glu
1622	C1_14630C_A	293.113	-2.89901	0.355644	-8.15145	3.59593e-16	6.75004e-15	study5_Casamino_acid_vs_Glu
1623	C3_06870W_A	353131	-2.41707	0.281999	-8.5712	1.0241e-17	2.16935e-16	study5_Casamino_acid_vs_Glu
1624	C4_07170C_A	83.2015	-1.78588	0.407737	-4.37999	1.18687e-05	5.93214e-05	study5_Casamino_acid_vs_Glu
1625	CR_08550W_A	4282.86	1.67216	0.242509	6.89525	5.37708e-12	6.70176e-11	study5_Casamino_acid_vs_Glu
1626	C3_00440W_A	135.304	-1.0615	0.284907	-3.72576	0.000194725	0.00073795	study5_Casamino_acid_vs_Glu
1627	C1_08330C_A	18329.1	4.83834	0.245183	19.7336	1.11066e-86	3.10832e-84	study5_Casamino_acid_vs_Glu
1628	C2_01710W_A	843.516	1.36455	0.252259	5.40932	6.32629e-08	4.70991e-07	study5_Casamino_acid_vs_Glu
1629	C7_03720C_A	4509.76	-1.97108	0.320774	-6.14476	8.00862e-10	7.74083e-09	study5_Casamino_acid_vs_Glu
1630	CR_02940C_A	247.276	-1.92804	0.267867	-7.19775	6.12144e-13	8.3017e-12	study5_Casamino_acid_vs_Glu
1631	C3_07400W_A	695.316	-1.02186	0.22209	-4.6011	4.20268e-06	2.30418e-05	study5_Casamino_acid_vs_Glu
1632	C1_02120C_A	48598.2	1.90477	0.333167	5.71718	1.08306e-08	9.07472e-08	study5_Casamino_acid_vs_Glu
1633	C1_12880C_A	1695.49	1.52696	0.284832	5.36091	8.28045e-08	6.0766e-07	study5_Casamino_acid_vs_Glu
1634	C4_06610C_A	17243	2.7688	0.249702	11.0884	1.42851e-28	6.41996e-27	study5_Casamino_acid_vs_Glu
1635	C3_05360C_A	3633.03	1.20342	0.245877	4.89441	9.86032e-07	6.071e-06	study5_Casamino_acid_vs_Glu
1636	C7_04090C_A	1606.25	-1.65702	0.244577	-6.77505	1.24364e-11	1.48681e-10	study5_Casamino_acid_vs_Glu
1637	C2_01040W_A	194.766	1.20438	0.271571	4.43486	9.21322e-06	4.69973e-05	study5_Casamino_acid_vs_Glu
1638	CR_03790C_A	219.233	-2.15687	0.456056	-4.72941	2.25176e-06	1.31041e-05	study5_Casamino_acid_vs_Glu
1639	C1_13850C_A	90.0088	1.79205	0.405482	4.41955	9.89085e-06	5.00805e-05	study5_Casamino_acid_vs_Glu
1640	C5_03870C_A	2014.52	2.52161	0.195054	12.9278	3.13801e-38	2.0775e-36	study5_Casamino_acid_vs_Glu
1641	C2_03940C_A	824.298	-1.0522	0.250071	-4.20758	2.58115e-05	0.0001215	study5_Casamino_acid_vs_Glu
1642	C1_11100W_A	1367.83	1.18198	0.205035	5.76479	8.17593e-09	7.02081e-08	study5_Casamino_acid_vs_Glu
1643	C1_07700C_A	1436.21	-1.30714	0.206639	-6.32568	2.5212e-10	2.61771e-09	study5_Casamino_acid_vs_Glu
1644	C3_02680C_A	1722.59	-1.54915	0.256509	-6.03938	1.54708e-09	1.43671e-08	study5_Casamino_acid_vs_Glu
1645	C2_07940C_A	914.984	-1.33371	0.222446	-5.99563	2.02699e-09	1.84346e-08	study5_Casamino_acid_vs_Glu
1646	C3_02820C_A	1568.96	1.30737	0.169182	7.72761	1.09584e-14	1.75706e-13	study5_Casamino_acid_vs_Glu
1647	C2_09980W_A	7802.71	1.49751	0.370098	4.04626	5.20426e-05	0.00022629	study5_Casamino_acid_vs_Glu
1648	C1_09100W_A	373.24	1.55283	0.260353	5.96433	2.45641e-09	2.21113e-08	study5_Casamino_acid_vs_Glu
1649	C1_07960W_A	424.797	1.1881	0.394252	3.01356	0.00258198	0.00735303	study5_Casamino_acid_vs_Glu
1650	C1_08840W_A	94.3684	-1.54192	0.303133	-5.08663	3.6449e-07	2.4079e-06	study5_Casamino_acid_vs_Glu
1651	C6_03600C_A	188.698	4.17157	0.645284	6.46471	1.01495e-10	1.10799e-09	study5_Casamino_acid_vs_Glu
1652	C1_13080W_A	6522.51	8.06739	0.52089	15.4877	4.19932e-54	4.536e-52	study5_Casamino_acid_vs_Glu
1653	CR_09350C_A	12.7433	-3.18133	0.774496	-4.10761	3.99772e-05	0.000177718	study5_Casamino_acid_vs_Glu
1654	C2_01270W_A	9323.29	5.43288	0.364476	14.906	3.0125e-50	2.81029e-48	study5_Casamino_acid_vs_Glu
1655	CR_01310W_A	16478.1	1.39702	0.217982	6.40887	1.46601e-10	1.56164e-09	study5_Casamino_acid_vs_Glu
1656	CR_08320W_A	510.33	-1.48992	0.334653	-4.45213	8.5023e-06	4.35513e-05	study5_Casamino_acid_vs_Glu
1657	C2_01980C_A	1160.9	-1.04128	0.19796	-5.26004	1.44027e-07	1.01811e-06	study5_Casamino_acid_vs_Glu
1658	C3_04440C_A	55.6888	2.05051	0.461252	4.44554	8.7672e-06	4.48709e-05	study5_Casamino_acid_vs_Glu
1659	C6_02790C_A	1224.92	2.53925	0.326172	7.78499	6.97205e-15	1.14778e-13	study5_Casamino_acid_vs_Glu
1660	C1_02500W_A	563.154	1.0235	0.178081	5.74736	9.0646e-09	7.71933e-08	study5_Casamino_acid_vs_Glu
1661	C2_00840W_A	757.22	-1.59073	0.314472	-5.05842	4.22737e-07	2.75428e-06	study5_Casamino_acid_vs_Glu
1662	CR_01280C_A	965.42	1.48221	0.21594	6.86396	6.69751e-12	8.26384e-11	study5_Casamino_acid_vs_Glu
1663	C2_10020C_A	13.4407	-2.35274	0.7089	-3.31886	0.000903858	0.00290907	study5_Casamino_acid_vs_Glu
1664	C1_10550C_A	715.039	1.88652	0.266606	7.07607	1.48303e-12	1.94277e-11	study5_Casamino_acid_vs_Glu
1665	C1_11320C_A	23793.7	9.03287	0.544949	16.5756	1.04604e-61	1.49778e-59	study5_Casamino_acid_vs_Glu
1666	C7_00280W_A	1253.09	6.77795	0.563059	12.0377	2.25101e-33	1.2486e-31	study5_Casamino_acid_vs_Glu
1667	C4_02270C_A	9900.69	-1.26747	0.209035	-6.06342	1.33257e-09	1.2488e-08	study5_Casamino_acid_vs_Glu
1668	C5_04960W_A	4842.91	2.581	0.223866	11.5292	9.40058e-31	4.66769e-29	study5_Casamino_acid_vs_Glu
1669	C2_03270W_A	86410.1	-3.56723	0.287741	-12.3974	2.70069e-35	1.58363e-33	study5_Casamino_acid_vs_Glu
1670	C4_04410C_A	3587.63	-1.05807	0.341171	-3.10129	0.00192679	0.00567077	study5_Casamino_acid_vs_Glu
1671	C2_04650C_A	1579.4	1.11623	0.239976	4.65143	3.29646e-06	1.8468e-05	study5_Casamino_acid_vs_Glu
1672	C3_03760W_A	3179.53	1.78581	0.280545	6.36552	1.94625e-10	2.05541e-09	study5_Casamino_acid_vs_Glu
1673	C5_04870W_A	971.256	1.0668	0.225172	4.73773	2.16129e-06	1.26134e-05	study5_Casamino_acid_vs_Glu
1674	C6_01260W_A	195.692	1.54351	0.343875	4.48858	7.17002e-06	3.72853e-05	study5_Casamino_acid_vs_Glu
1675	C1_13720W_A	897.213	-1.72765	0.302546	-5.71038	1.12726e-08	9.36642e-08	study5_Casamino_acid_vs_Glu
1676	C7_01050W_A	68.3324	-1.18257	0.319717	-3.69879	0.000216626	0.000812281	study5_Casamino_acid_vs_Glu
1677	C1_09480W_A	212.945	-1.09889	0.24841	-4.42368	9.70326e-06	4.92522e-05	study5_Casamino_acid_vs_Glu
1678	C4_07090C_A	3008.54	-2.8207	0.330453	-8.53585	1.39128e-17	2.90377e-16	study5_Casamino_acid_vs_Glu
1679	C5_01100C_A	961.224	-1.11256	0.249238	-4.46384	8.05037e-06	4.14086e-05	study5_Casamino_acid_vs_Glu
1680	C6_03160C_A	2179.97	-1.13281	0.240155	-4.71701	2.39331e-06	1.38884e-05	study5_Casamino_acid_vs_Glu
1681	CR_03580C_A	503.503	3.08685	0.470127	6.56601	5.16821e-11	5.84938e-10	study5_Casamino_acid_vs_Glu
1682	C1_09080C_A	1666.18	-1.46103	0.370377	-3.94472	7.98917e-05	0.000331688	study5_Casamino_acid_vs_Glu
1683	C3_04350C_A	161.545	-1.60912	0.358608	-4.48711	7.2195e-06	3.74951e-05	study5_Casamino_acid_vs_Glu
1684	C1_05030C_A	799.825	-1.87698	0.260812	-7.19666	6.17072e-13	8.35014e-12	study5_Casamino_acid_vs_Glu
1685	CR_09740W_A	1112.19	1.16773	0.314755	3.70996	0.000207288	0.000780118	study5_Casamino_acid_vs_Glu
1686	C2_06990W_A	1153.35	4.97467	0.296046	16.8037	2.29153e-63	3.61768e-61	study5_Casamino_acid_vs_Glu
1687	C7_02760W_A	519.265	-1.15434	0.21642	-5.33377	9.61929e-08	6.99244e-07	study5_Casamino_acid_vs_Glu
1688	CR_09500C_A	1120.52	1.44113	0.191951	7.50777	6.01422e-14	8.94434e-13	study5_Casamino_acid_vs_Glu
1689	C2_10650W_A	473.939	1.98334	0.308625	6.42639	1.30668e-10	1.40161e-09	study5_Casamino_acid_vs_Glu
1690	C2_05130W_A	1431.12	2.52822	0.313371	8.06783	7.15595e-16	1.3152e-14	study5_Casamino_acid_vs_Glu
1691	C1_00290W_A	1429.76	-2.12212	0.341578	-6.2127	5.20815e-10	5.22257e-09	study5_Casamino_acid_vs_Glu
1692	C6_01440C_A	77.9748	4.81594	0.605381	7.95523	1.78802e-15	3.11865e-14	study5_Casamino_acid_vs_Glu
1693	C4_05070C_A	2578.43	-4.45492	0.398442	-11.1808	5.06035e-29	2.32512e-27	study5_Casamino_acid_vs_Glu
1694	C5_01230C_A	2153.47	-1.12759	0.177775	-6.3428	2.25624e-10	2.36655e-09	study5_Casamino_acid_vs_Glu
1695	C5_05320C_A	5481.63	-2.33202	0.321977	-7.24281	4.39484e-13	6.05348e-12	study5_Casamino_acid_vs_Glu
1696	C2_10350C_A	19709.3	3.37193	0.289343	11.6538	2.1952e-31	1.10785e-29	study5_Casamino_acid_vs_Glu
1697	CR_01220W_A	14.9835	4.16573	0.902766	4.61441	3.94213e-06	2.18075e-05	study5_Casamino_acid_vs_Glu
1698	C1_14360C_A	2557.52	-1.62644	0.189097	-8.60111	7.89515e-18	1.69967e-16	study5_Casamino_acid_vs_Glu
1699	C1_07770W_A	140.083	-1.47896	0.339688	-4.35389	1.33741e-05	6.60868e-05	study5_Casamino_acid_vs_Glu
1700	C5_05390C_A	7709.49	1.32254	0.30803	4.29354	1.75844e-05	8.52497e-05	study5_Casamino_acid_vs_Glu
1701	C4_02220C_A	239.355	4.13639	0.504318	8.20195	2.36519e-16	4.48076e-15	study5_Casamino_acid_vs_Glu
1702	C1_09060C_A	1239.16	1.10913	0.21467	5.16668	2.38284e-07	1.60868e-06	study5_Casamino_acid_vs_Glu
1703	C6_01740C_A	2521.5	1.52025	0.207799	7.31594	2.55588e-13	3.58463e-12	study5_Casamino_acid_vs_Glu
1704	CR_05330W_A	1221.65	-1.55017	0.373696	-4.14821	3.35086e-05	0.000152036	study5_Casamino_acid_vs_Glu
1705	C2_02680W_A	923.302	-1.42815	0.29212	-4.88892	1.01391e-06	6.22397e-06	study5_Casamino_acid_vs_Glu
1706	CR_00540C_A	30099.8	4.07046	0.178679	22.7808	7.10014e-115	4.85728e-112	study5_Casamino_acid_vs_Glu
1707	CR_06870C_A	86.0757	5.60299	0.553977	10.1141	4.78248e-24	1.63587e-22	study5_Casamino_acid_vs_Glu
1708	C2_07910C_A	398.248	-2.41274	0.249776	-9.65963	4.47469e-22	1.29956e-20	study5_Casamino_acid_vs_Glu
1709	C2_02860W_A	6959.86	-3.08045	0.23885	-12.897	4.68048e-38	3.00184e-36	study5_Casamino_acid_vs_Glu
1710	C2_01690W_A	7567.66	1.46299	0.207936	7.03577	1.98162e-12	2.56859e-11	study5_Casamino_acid_vs_Glu
1711	CR_02920C_A	2897.94	4.05508	0.530425	7.64498	2.08985e-14	3.25751e-13	study5_Casamino_acid_vs_Glu
1712	C6_01450C_A	3437.1	5.75269	0.276133	20.8331	2.17118e-96	7.86349e-94	study5_Casamino_acid_vs_Glu
1713	C1_10690W_A	609.445	-1.34593	0.240877	-5.58761	2.30212e-08	1.82422e-07	study5_Casamino_acid_vs_Glu
1714	C1_02150W_A	7427.32	2.61961	0.504937	5.188	2.12561e-07	1.45454e-06	study5_Casamino_acid_vs_Glu
1715	CR_00550W_A	27.4877	-2.32794	0.579535	-4.01691	5.89671e-05	0.000252301	study5_Casamino_acid_vs_Glu
1716	C2_05440W_A	1522.16	1.14855	0.254818	4.50735	6.56424e-06	3.44259e-05	study5_Casamino_acid_vs_Glu
1717	C5_03440W_A	1157.91	-4.14374	0.360148	-11.5057	1.23507e-30	6.08344e-29	study5_Casamino_acid_vs_Glu
1718	C1_13160W_A	3264.29	1.82497	0.440283	4.14499	3.39823e-05	0.000154071	study5_Casamino_acid_vs_Glu
1719	C7_02010C_A	238.626	3.6556	0.338829	10.7889	3.88251e-27	1.62617e-25	study5_Casamino_acid_vs_Glu
1720	C3_04020C_A	1951.94	1.45289	0.230361	6.30699	2.84508e-10	2.92929e-09	study5_Casamino_acid_vs_Glu
1721	C2_04180C_A	1027.21	1.18459	0.157465	7.52287	5.35874e-14	8.02768e-13	study5_Casamino_acid_vs_Glu
1722	C5_02920W_A	1586.1	1.07695	0.234522	4.59212	4.38757e-06	2.39488e-05	study5_Casamino_acid_vs_Glu
1723	C1_10710C_A	131.691	-1.57361	0.289026	-5.44453	5.19438e-08	3.90022e-07	study5_Casamino_acid_vs_Glu
1724	C3_01170W_A	1950.05	1.08489	0.211856	5.12088	3.04117e-07	2.02866e-06	study5_Casamino_acid_vs_Glu
1725	CR_06930W_A	1453.65	1.30621	0.198343	6.58561	4.53018e-11	5.14618e-10	study5_Casamino_acid_vs_Glu
1726	C2_09830C_A	2558.23	1.55451	0.248136	6.26473	3.73468e-10	3.79445e-09	study5_Casamino_acid_vs_Glu
1727	C3_05390C_A	309.81	-1.66944	0.235619	-7.08532	1.38722e-12	1.82502e-11	study5_Casamino_acid_vs_Glu
1728	C1_05160C_A	16852	3.68444	0.381523	9.6572	4.58225e-22	1.32455e-20	study5_Casamino_acid_vs_Glu
1729	C3_06700C_A	7340.09	-2.06028	0.237905	-8.66009	4.71379e-18	1.03653e-16	study5_Casamino_acid_vs_Glu
1730	C3_03860W_A	395.754	-1.57662	0.220233	-7.15887	8.13418e-13	1.08638e-11	study5_Casamino_acid_vs_Glu
1731	CR_01620C_A	50545.4	1.33154	0.318333	4.18286	2.87862e-05	0.000133361	study5_Casamino_acid_vs_Glu
1732	C2_06190W_A	2957.94	-1.4345	0.258667	-5.54575	2.92701e-08	2.27833e-07	study5_Casamino_acid_vs_Glu
1733	C6_03770C_A	2238.02	1.68629	0.196826	8.56742	1.05832e-17	2.22391e-16	study5_Casamino_acid_vs_Glu
1734	C7_02920W_A	1036.19	3.01737	0.354778	8.50497	1.81645e-17	3.72796e-16	study5_Casamino_acid_vs_Glu
1735	C6_03260W_A	5367.43	2.20946	0.398018	5.55116	2.83782e-08	2.21731e-07	study5_Casamino_acid_vs_Glu
1736	C2_05820W_A	849.928	1.27611	0.405129	3.1499	0.00163327	0.0049006	study5_Casamino_acid_vs_Glu
1737	C7_03570W_A	3343.07	-4.06861	0.46332	-8.78143	1.61416e-18	3.65381e-17	study5_Casamino_acid_vs_Glu
1738	C2_00150W_A	1365.44	1.37531	0.163169	8.42876	3.49334e-17	6.98327e-16	study5_Casamino_acid_vs_Glu
1739	C2_04660C_A	4372.97	2.26553	0.241329	9.38774	6.13032e-21	1.64823e-19	study5_Casamino_acid_vs_Glu
1740	C5_03310C_A	262.981	-1.31513	0.26646	-4.93557	7.99172e-07	5.0056e-06	study5_Casamino_acid_vs_Glu
1741	C7_00630C_A	89.1037	2.55044	0.430346	5.92648	3.09495e-09	2.75769e-08	study5_Casamino_acid_vs_Glu
1742	C7_01560C_A	81.1225	-2.04327	0.688432	-2.968	0.00299744	0.00839637	study5_Casamino_acid_vs_Glu
1743	C1_01710W_A	5607.3	2.27554	0.288383	7.89068	3.00536e-15	5.09752e-14	study5_Casamino_acid_vs_Glu
1744	C4_07030W_A	2853.89	-2.35788	0.392589	-6.00599	1.90171e-09	1.74239e-08	study5_Casamino_acid_vs_Glu
1745	C2_02310W_A	3954.54	1.85753	0.167156	11.1125	1.09061e-28	4.93741e-27	study5_Casamino_acid_vs_Glu
1746	C6_02340W_A	12696.8	1.00077	0.247315	4.04653	5.19817e-05	0.000226185	study5_Casamino_acid_vs_Glu
1747	C5_00650C_A	2453.23	-2.52738	0.25799	-9.79641	1.16658e-22	3.60937e-21	study5_Casamino_acid_vs_Glu
1748	CR_06080W_A	8462.44	1.54534	0.414182	3.73106	0.000190674	0.000723338	study5_Casamino_acid_vs_Glu
1749	CR_01870C_A	38.0023	-1.49694	0.403177	-3.71285	0.000204938	0.000772217	study5_Casamino_acid_vs_Glu
1750	C3_00010C_A	98.1689	-1.02404	0.377388	-2.71351	0.00665751	0.0169873	study5_Casamino_acid_vs_Glu
1751	C3_02810C_A	1134.29	2.43877	0.306011	7.96956	1.59245e-15	2.80452e-14	study5_Casamino_acid_vs_Glu
1752	C3_02190C_A	3400.66	1.62606	0.195197	8.33034	8.06112e-17	1.59078e-15	study5_Casamino_acid_vs_Glu
1753	C1_09870W_A	475.605	-2.15128	0.337215	-6.37954	1.77623e-10	1.88556e-09	study5_Casamino_acid_vs_Glu
1754	CR_08710W_A	5964.69	1.23745	0.179567	6.89127	5.5298e-12	6.87818e-11	study5_Casamino_acid_vs_Glu
1755	C2_07900W_A	60346	4.84022	0.327128	14.7961	1.55169e-49	1.38461e-47	study5_Casamino_acid_vs_Glu
1756	C2_00180C_A	1189.24	1.38016	0.171344	8.05489	7.95486e-16	1.45768e-14	study5_Casamino_acid_vs_Glu
1757	C2_05770W_A	850.976	2.10594	0.249888	8.42753	3.53026e-17	7.03423e-16	study5_Casamino_acid_vs_Glu
1758	C3_05050W_A	3750.38	9.83847	0.466171	21.1048	7.18117e-99	3.15817e-96	study5_Casamino_acid_vs_Glu
1759	C2_02390W_A	2281.32	1.97353	0.376073	5.24773	1.53981e-07	1.08226e-06	study5_Casamino_acid_vs_Glu
1760	C1_12720C_A	40.6215	1.40903	0.510356	2.76088	0.00576451	0.014944	study5_Casamino_acid_vs_Glu
1761	C7_03870W_A	2474.3	-1.07428	0.191669	-5.60489	2.08389e-08	1.66414e-07	study5_Casamino_acid_vs_Glu
1762	C1_09030C_A	7992.54	1.26481	0.221519	5.70974	1.13151e-08	9.3891e-08	study5_Casamino_acid_vs_Glu
1763	C1_08170C_A	1677.27	-1.44153	0.321526	-4.48341	7.34612e-06	3.80404e-05	study5_Casamino_acid_vs_Glu
1764	C1_07200W_A	1461.77	-1.24907	0.290792	-4.29542	1.74366e-05	8.46664e-05	study5_Casamino_acid_vs_Glu
1765	C5_03710C_A	299.806	1.49849	0.214871	6.9739	3.08273e-12	3.8974e-11	study5_Casamino_acid_vs_Glu
1766	CR_09200C_A	928.457	1.21319	0.192263	6.31005	2.78941e-10	2.87678e-09	study5_Casamino_acid_vs_Glu
1767	C6_03320W_A	3350.31	-2.1874	0.218822	-9.99626	1.58257e-23	5.16938e-22	study5_Casamino_acid_vs_Glu
1768	C3_06940W_A	2976.07	1.50774	0.194739	7.74237	9.75775e-15	1.57686e-13	study5_Casamino_acid_vs_Glu
1769	C1_13180W_A	62.7826	2.81552	0.444088	6.34001	2.29747e-10	2.4057e-09	study5_Casamino_acid_vs_Glu
1770	C3_00400C_A	1471.6	1.50048	0.233021	6.43923	1.20081e-10	1.29708e-09	study5_Casamino_acid_vs_Glu
1771	C2_09950W_A	3372.78	-1.0184	0.197105	-5.16678	2.38158e-07	1.60868e-06	study5_Casamino_acid_vs_Glu
1772	C4_04850C_A	1511.03	-2.87355	0.24126	-11.9106	1.04238e-32	5.53272e-31	study5_Casamino_acid_vs_Glu
1773	C6_00420W_A	2116.77	-1.15953	0.18716	-6.19539	5.81394e-10	5.78295e-09	study5_Casamino_acid_vs_Glu
1774	C2_03830W_A	1276.63	-1.14332	0.176088	-6.4929	8.42018e-11	9.27425e-10	study5_Casamino_acid_vs_Glu
1775	CR_05180C_A	7252.58	2.93991	0.191622	15.3423	3.99032e-53	4.16414e-51	study5_Casamino_acid_vs_Glu
1776	C4_07160W_A	270.419	-1.34467	0.22653	-5.93593	2.92188e-09	2.61103e-08	study5_Casamino_acid_vs_Glu
1777	C1_12190W_A	773.143	-1.1206	0.266967	-4.19751	2.69868e-05	0.00012626	study5_Casamino_acid_vs_Glu
1778	CR_04220C_A	551.53	-1.10938	0.323593	-3.42832	0.000607325	0.00203999	study5_Casamino_acid_vs_Glu
1779	C1_04720W_A	819.733	-1.2193	0.235395	-5.17979	2.22139e-07	1.51162e-06	study5_Casamino_acid_vs_Glu
1780	C6_01490C_A	2772.55	5.60778	0.335237	16.7278	8.22516e-63	1.23518e-60	study5_Casamino_acid_vs_Glu
1781	C7_00080C_A	2352.3	1.05477	0.264971	3.98069	6.87159e-05	0.00029118	study5_Casamino_acid_vs_Glu
1782	C1_12730W_A	1573.54	1.00398	0.229627	4.37224	1.22979e-05	6.12109e-05	study5_Casamino_acid_vs_Glu
1783	C7_03830C_A	1608.56	-1.13431	0.170585	-6.64956	2.93966e-11	3.38308e-10	study5_Casamino_acid_vs_Glu
1784	C1_10300W_A	744.634	-1.14801	0.440494	-2.60619	0.00915555	0.0224317	study5_Casamino_acid_vs_Glu
1785	C2_10110W_A	4145.33	1.68836	0.361815	4.66638	3.06559e-06	1.72847e-05	study5_Casamino_acid_vs_Glu
1786	C2_03070C_A	305.045	-1.53566	0.296005	-5.18795	2.12617e-07	1.45454e-06	study5_Casamino_acid_vs_Glu
1787	C4_03820C_A	912.441	3.102	0.339106	9.14759	5.82196e-20	1.46309e-18	study5_Casamino_acid_vs_Glu
1788	C4_00160C_A	29493.2	3.75442	0.196157	19.1398	1.1763e-81	3.0177e-79	study5_Casamino_acid_vs_Glu
1789	C4_02610C_A	1244.59	-1.96743	0.355614	-5.53249	3.15724e-08	2.45134e-07	study5_Casamino_acid_vs_Glu
1790	C3_03560W_A	812.094	-1.73473	0.170413	-10.1796	2.44569e-24	8.60463e-23	study5_Casamino_acid_vs_Glu
1791	C5_00930C_A	11559.1	1.1627	0.242391	4.79679	1.61231e-06	9.61918e-06	study5_Casamino_acid_vs_Glu
1792	C1_05470W_A	562.174	-1.3919	0.268455	-5.18484	2.16202e-07	1.47742e-06	study5_Casamino_acid_vs_Glu
1793	C1_09290C_A	5229.02	-3.05041	0.359161	-8.49314	2.01123e-17	4.11401e-16	study5_Casamino_acid_vs_Glu
1794	C6_01750C_A	401.5	-1.0014	0.217929	-4.59506	4.32621e-06	2.36769e-05	study5_Casamino_acid_vs_Glu
1795	C6_02480W_A	542.159	-2.32653	0.300339	-7.74634	9.45759e-15	1.53238e-13	study5_Casamino_acid_vs_Glu
1796	C7_02750W_A	314.693	-1.56672	0.360186	-4.34976	1.36285e-05	6.72901e-05	study5_Casamino_acid_vs_Glu
1797	C5_05200C_A	1747.2	-1.22647	0.227027	-5.40232	6.57853e-08	4.88e-07	study5_Casamino_acid_vs_Glu
1798	C3_01890C_A	5975.58	1.1414	0.191865	5.94898	2.69818e-09	2.42168e-08	study5_Casamino_acid_vs_Glu
1799	CR_08420W_A	2787.27	2.67769	0.5036	5.31709	1.05442e-07	7.62877e-07	study5_Casamino_acid_vs_Glu
1800	C1_12220W_A	432.546	-1.30442	0.464222	-2.8099	0.00495574	0.0131539	study5_Casamino_acid_vs_Glu
1801	CR_09580C_A	2864.65	1.12649	0.374402	3.00878	0.00262302	0.00745957	study5_Casamino_acid_vs_Glu
1802	C4_04970C_A	2447.36	1.38601	0.23452	5.91	3.42099e-09	3.03066e-08	study5_Casamino_acid_vs_Glu
1803	C6_04220C_A	3666.11	1.72446	0.240926	7.15766	8.20664e-13	1.09369e-11	study5_Casamino_acid_vs_Glu
1804	C6_02500C_A	6930.87	3.3449	0.229017	14.6054	2.59287e-48	2.21726e-46	study5_Casamino_acid_vs_Glu
1805	CR_09830W_A	348.991	-2.00219	0.198219	-10.1009	5.4747e-24	1.85207e-22	study5_Casamino_acid_vs_Glu
1806	CR_08990C_A	9800.45	1.00409	0.378982	2.64945	0.0080624	0.0200973	study5_Casamino_acid_vs_Glu
1807	C2_06870C_A	4230.73	1.51354	0.359343	4.21197	2.53151e-05	0.000119346	study5_Casamino_acid_vs_Glu
1808	C2_09860C_A	390.047	-1.38172	0.337261	-4.09688	4.18756e-05	0.000185488	study5_Casamino_acid_vs_Glu
1809	C4_02330C_A	1414.95	1.52984	0.30377	5.03617	4.74933e-07	3.07807e-06	study5_Casamino_acid_vs_Glu
1810	C5_03150W_A	6374.3	1.06534	0.183745	5.79792	6.71439e-09	5.83905e-08	study5_Casamino_acid_vs_Glu
1811	C6_00620W_A	1598.25	1.79676	0.261256	6.87739	6.09573e-12	7.55159e-11	study5_Casamino_acid_vs_Glu
1812	C2_08950W_A	567.913	1.65094	0.316929	5.20917	1.89686e-07	1.31224e-06	study5_Casamino_acid_vs_Glu
1813	C1_09020W_A	4815.55	2.27155	0.227409	9.98887	1.70522e-23	5.52582e-22	study5_Casamino_acid_vs_Glu
1814	C5_02790C_A	1623.35	-1.53976	0.410148	-3.75416	0.000173922	0.00066844	study5_Casamino_acid_vs_Glu
1815	C4_03620C_A	1511.04	1.63161	0.231032	7.06224	1.63837e-12	2.13265e-11	study5_Casamino_acid_vs_Glu
1816	C1_09610W_A	2054.14	-1.09861	0.282739	-3.88562	0.00010207	0.000414541	study5_Casamino_acid_vs_Glu
1817	C1_02080W_A	360.116	-1.42387	0.227535	-6.25783	3.90373e-10	3.94668e-09	study5_Casamino_acid_vs_Glu
1818	C1_08000W_A	904.824	-1.4805	0.229347	-6.45528	1.08018e-10	1.17089e-09	study5_Casamino_acid_vs_Glu
1819	C6_02550W_A	9.03861	-2.85236	0.896329	-3.18227	0.00146126	0.00444954	study5_Casamino_acid_vs_Glu
1820	C2_09960W_A	941.74	2.06617	0.199111	10.377	3.15675e-25	1.15691e-23	study5_Casamino_acid_vs_Glu
1821	C4_00830W_A	1331.46	1.538	0.285464	5.38774	7.13502e-08	5.26742e-07	study5_Casamino_acid_vs_Glu
1822	C2_02970C_A	68880.1	4.44753	0.278669	15.9599	2.4302e-57	2.82316e-55	study5_Casamino_acid_vs_Glu
1823	C1_13880C_A	4012.23	1.85468	0.282575	6.56348	5.25674e-11	5.93867e-10	study5_Casamino_acid_vs_Glu
1824	C4_04530C_A	5734.37	4.58032	0.390157	11.7397	7.97682e-32	4.09277e-30	study5_Casamino_acid_vs_Glu
1825	CR_03850W_A	423.116	1.38826	0.214979	6.45767	1.06325e-10	1.15458e-09	study5_Casamino_acid_vs_Glu
1826	C4_00100C_A	1588.09	1.58073	0.252082	6.2707	3.59419e-10	3.65776e-09	study5_Casamino_acid_vs_Glu
1827	CR_04420C_A	439.614	1.3967	0.326311	4.28028	1.86657e-05	9.02076e-05	study5_Casamino_acid_vs_Glu
1828	C7_03350C_A	380.957	-1.12282	0.273283	-4.10862	3.98029e-05	0.000177199	study5_Casamino_acid_vs_Glu
1829	C7_00870W_A	525.888	3.04718	0.253584	12.0164	2.91265e-33	1.60118e-31	study5_Casamino_acid_vs_Glu
1830	C2_00600C_A	1696.25	2.50861	0.307548	8.15681	3.43986e-16	6.47683e-15	study5_Casamino_acid_vs_Glu
1831	C1_09170W_A	2419.34	1.25795	0.25405	4.95159	7.36081e-07	4.634e-06	study5_Casamino_acid_vs_Glu
1832	C3_07440W_A	30510.2	-2.20224	0.260927	-8.44006	3.17172e-17	6.36099e-16	study5_Casamino_acid_vs_Glu
1833	CR_03780C_A	201.64	-1.44119	0.234413	-6.14808	7.84263e-10	7.60426e-09	study5_Casamino_acid_vs_Glu
1834	C3_01460C_A	2678.55	2.85391	0.230984	12.3555	4.55175e-35	2.61917e-33	study5_Casamino_acid_vs_Glu
1835	CR_05120W_A	2771.42	1.01176	0.175229	5.77393	7.74458e-09	6.66929e-08	study5_Casamino_acid_vs_Glu
1836	C1_08510W_A	889.698	-1.04389	0.216997	-4.81062	1.50461e-06	9.02912e-06	study5_Casamino_acid_vs_Glu
1837	C5_04810W_A	24748	-2.60574	0.315063	-8.27053	1.3337e-16	2.5904e-15	study5_Casamino_acid_vs_Glu
1838	CR_03260W_A	2262.08	2.50885	0.318035	7.8886	3.05607e-15	5.15513e-14	study5_Casamino_acid_vs_Glu
1839	C1_08410C_A	2782.99	-2.83204	0.264301	-10.7152	8.63497e-27	3.54437e-25	study5_Casamino_acid_vs_Glu
1840	CR_04480C_A	2143.21	-1.59249	0.244043	-6.52543	6.78055e-11	7.53571e-10	study5_Casamino_acid_vs_Glu
1841	C3_04630W_A	907.763	1.87903	0.19154	9.81014	1.0183e-22	3.18257e-21	study5_Casamino_acid_vs_Glu
1842	CR_10420W_A	2514.16	1.75641	0.290727	6.04143	1.52757e-09	1.42073e-08	study5_Casamino_acid_vs_Glu
1843	C2_03920C_A	751.152	-1.24912	0.304086	-4.10778	3.99484e-05	0.000177718	study5_Casamino_acid_vs_Glu
1844	C6_01170W_A	1267.33	1.23648	0.474299	2.60696	0.00913499	0.0223902	study5_Casamino_acid_vs_Glu
1845	C1_02800W_A	233.917	2.26412	0.474392	4.77267	1.81796e-06	1.07214e-05	study5_Casamino_acid_vs_Glu
1846	C7_02530C_A	1218.84	1.00853	0.200359	5.03362	4.81304e-07	3.1128e-06	study5_Casamino_acid_vs_Glu
1847	C2_02190C_A	503.645	1.17018	0.238057	4.91556	8.85273e-07	5.51125e-06	study5_Casamino_acid_vs_Glu
1848	CR_05610C_A	2018.69	2.2522	0.207062	10.8769	1.48538e-27	6.44046e-26	study5_Casamino_acid_vs_Glu
1849	C4_00200C_A	28647.7	-1.88521	0.404565	-4.65985	3.16445e-06	1.77769e-05	study5_Casamino_acid_vs_Glu
1850	C7_01800C_A	38020.9	-2.42737	0.330644	-7.34134	2.11459e-13	2.9793e-12	study5_Casamino_acid_vs_Glu
1851	CR_05800C_A	1001.2	-1.92127	0.272904	-7.04009	1.92112e-12	2.49543e-11	study5_Casamino_acid_vs_Glu
1852	C4_02260C_A	923.806	-1.08883	0.397371	-2.74008	0.00614238	0.0157907	study5_Casamino_acid_vs_Glu
1853	C4_02660W_A	392.27	1.64354	0.257738	6.37679	1.80839e-10	1.91639e-09	study5_Casamino_acid_vs_Glu
1854	C1_07920W_A	1569.7	1.34165	0.228838	5.86291	4.54815e-09	4.00042e-08	study5_Casamino_acid_vs_Glu
1855	CR_05430W_A	82.5643	-1.15406	0.330785	-3.48885	0.000485106	0.00166488	study5_Casamino_acid_vs_Glu
1856	C4_03280W_A	10285.5	1.2219	0.266951	4.57725	4.71121e-06	2.56019e-05	study5_Casamino_acid_vs_Glu
1857	CR_05740C_A	1531.8	1.06598	0.212569	5.01476	5.31005e-07	3.42024e-06	study5_Casamino_acid_vs_Glu
1858	C2_03690C_A	233.363	-1.27776	0.370427	-3.44941	0.000561806	0.00189953	study5_Casamino_acid_vs_Glu
1859	C2_05950C_A	1222.97	2.75135	0.268222	10.2577	1.09241e-24	3.95645e-23	study5_Casamino_acid_vs_Glu
1860	C6_02520W_A	5617.85	2.47182	0.23441	10.5449	5.36538e-26	2.07765e-24	study5_Casamino_acid_vs_Glu
1861	C5_00890C_A	1045.37	2.77843	0.365771	7.59611	3.05177e-14	4.67406e-13	study5_Casamino_acid_vs_Glu
1862	C7_03140W_A	262.008	-3.30942	0.366814	-9.02206	1.84593e-19	4.47457e-18	study5_Casamino_acid_vs_Glu
1863	C6_00380C_A	573.741	-1.27652	0.18841	-6.77522	1.24217e-11	1.48681e-10	study5_Casamino_acid_vs_Glu
1864	C3_04890W_A	457.797	1.11043	0.208239	5.33249	9.68738e-08	7.03364e-07	study5_Casamino_acid_vs_Glu
1865	C2_08300C_A	15856.5	2.82053	0.402212	7.01254	2.34036e-12	3.00827e-11	study5_Casamino_acid_vs_Glu
1866	C2_01620W_A	9274.89	1.02612	0.253944	4.04072	5.32869e-05	0.000230722	study5_Casamino_acid_vs_Glu
1867	C1_00190C_A	1747.5	4.65019	0.386049	12.0456	2.04589e-33	1.14514e-31	study5_Casamino_acid_vs_Glu
1868	C2_06890C_A	688.343	-2.79745	0.505903	-5.52961	3.20935e-08	2.48866e-07	study5_Casamino_acid_vs_Glu
1869	C2_00680C_A	417.678	2.51947	0.491065	5.13063	2.88771e-07	1.92838e-06	study5_Casamino_acid_vs_Glu
1870	C2_09400C_A	1573.93	-1.16351	0.226036	-5.14747	2.64024e-07	1.77467e-06	study5_Casamino_acid_vs_Glu
1871	C5_01090C_A	2299	-1.38665	0.225473	-6.14996	7.75021e-10	7.55032e-09	study5_Casamino_acid_vs_Glu
1872	C1_13450W_A	565.177	2.42903	0.424311	5.72464	1.0365e-08	8.74214e-08	study5_Casamino_acid_vs_Glu
1873	C5_04470C_A	9122.31	1.59246	0.339247	4.69411	2.67766e-06	1.53362e-05	study5_Casamino_acid_vs_Glu
1874	C1_06620C_A	135.153	-1.01004	0.314227	-3.21436	0.00130734	0.00404082	study5_Casamino_acid_vs_Glu
1875	C6_02880W_A	1508.05	-1.2916	0.270286	-4.77863	1.76493e-06	1.04488e-05	study5_Casamino_acid_vs_Glu
1876	C2_07750W_A	654.145	-1.02065	0.224705	-4.54219	5.56727e-06	2.96777e-05	study5_Casamino_acid_vs_Glu
1877	CR_00110W_A	1524.1	1.04275	0.259474	4.0187	5.85213e-05	0.000250567	study5_Casamino_acid_vs_Glu
1878	C7_00220W_A	164.668	-2.20839	0.302272	-7.30599	2.75243e-13	3.85152e-12	study5_Casamino_acid_vs_Glu
1879	C3_02930W_A	97.6308	1.37832	0.278953	4.94104	7.77055e-07	4.87699e-06	study5_Casamino_acid_vs_Glu
1880	C2_01210C_A	3138.17	2.06064	0.297557	6.92518	4.35409e-12	5.4599e-11	study5_Casamino_acid_vs_Glu
1881	C2_00210W_A	16857.8	-1.29995	0.216964	-5.99155	2.07847e-09	1.88748e-08	study5_Casamino_acid_vs_Glu
1882	C1_03120W_A	3382.8	1.47349	0.201926	7.2972	2.93818e-13	4.10213e-12	study5_Casamino_acid_vs_Glu
1883	C7_00730W_A	5957.99	1.06912	0.194325	5.50172	3.76111e-08	2.89103e-07	study5_Casamino_acid_vs_Glu
1884	C4_03400W_A	2237.75	1.13624	0.211948	5.36091	8.2803e-08	6.0766e-07	study5_Casamino_acid_vs_Glu
1885	C6_03540W_A	1114.38	-1.13726	0.312372	-3.64074	0.000271858	0.000995144	study5_Casamino_acid_vs_Glu
1886	C1_11270W_A	6080.29	-1.19118	0.430097	-2.76956	0.00561316	0.0146194	study5_Casamino_acid_vs_Glu
1887	CR_05220C_A	761.707	1.03252	0.315113	3.27667	0.00105038	0.00331821	study5_Casamino_acid_vs_Glu
1888	C4_01390W_A	219.977	-1.12853	0.296714	-3.80343	0.000142705	0.000560713	study5_Casamino_acid_vs_Glu
1889	C3_05900W_A	873.613	-1.13794	0.268206	-4.2428	2.20753e-05	0.000105199	study5_Casamino_acid_vs_Glu
1890	CR_01900C_A	1319.92	-3.56325	0.235702	-15.1176	1.23997e-51	1.23137e-49	study5_Casamino_acid_vs_Glu
1891	C2_07550W_A	7521.29	1.46686	0.19451	7.54133	4.65188e-14	7.02001e-13	study5_Casamino_acid_vs_Glu
1892	C2_07490W_A	3539.71	-1.0015	0.147674	-6.78183	1.18662e-11	1.42974e-10	study5_Casamino_acid_vs_Glu
1893	C3_00870W_A	6.00899	3.73927	1.41849	2.63609	0.00838678	0.0207964	study5_Casamino_acid_vs_Glu
1894	C2_00940W_A	1790.88	1.8102	0.39478	4.58535	4.53232e-06	2.46951e-05	study5_Casamino_acid_vs_Glu
1895	C2_07270W_A	2126.68	-1.07191	0.296181	-3.6191	0.000295627	0.00107195	study5_Casamino_acid_vs_Glu
1896	CR_09030C_A	395.166	1.22594	0.213164	5.75117	8.86289e-09	7.55801e-08	study5_Casamino_acid_vs_Glu
1897	C5_03800W_A	1205.25	1.06375	0.213453	4.98351	6.24396e-07	3.99212e-06	study5_Casamino_acid_vs_Glu
1898	CR_06500C_A	2004.34	1.88571	0.383557	4.91636	8.81674e-07	5.4944e-06	study5_Casamino_acid_vs_Glu
1899	C2_08290C_A	86170.3	2.44266	0.40686	6.00368	1.92893e-09	1.76469e-08	study5_Casamino_acid_vs_Glu
1900	C2_10320C_A	157.385	-1.12023	0.287267	-3.89963	9.6341e-05	0.000393089	study5_Casamino_acid_vs_Glu
1901	C7_01780W_A	9033.83	2.01518	0.28825	6.99107	2.72806e-12	3.49203e-11	study5_Casamino_acid_vs_Glu
1902	C4_05200C_A	12.4681	-1.68428	0.658333	-2.55839	0.0105157	0.0253504	study5_Casamino_acid_vs_Glu
1903	C4_06620C_A	275.361	4.29484	0.425532	10.0929	5.94075e-24	1.99875e-22	study5_Casamino_acid_vs_Glu
1904	C1_13100W_A	1367.29	7.32366	1.05901	6.91555	4.66047e-12	5.83222e-11	study5_Casamino_acid_vs_Glu
1905	C5_01450W_A	843.435	1.16378	0.259904	4.47772	7.54441e-06	3.90016e-05	study5_Casamino_acid_vs_Glu
1906	C2_07440C_A	957.934	-1.32462	0.26123	-5.0707	3.96346e-07	2.60716e-06	study5_Casamino_acid_vs_Glu
1907	C1_13870W_A	6786.86	-5.11679	0.482408	-10.6068	2.77176e-26	1.08699e-24	study5_Casamino_acid_vs_Glu
1908	C2_04850C_A	5898.01	1.13001	0.229941	4.91435	8.90784e-07	5.53436e-06	study5_Casamino_acid_vs_Glu
1909	C2_04510W_A	678.538	-1.31815	0.334778	-3.93737	8.23794e-05	0.000341326	study5_Casamino_acid_vs_Glu
1910	C3_05250C_A	1965.84	1.3182	0.250481	5.26268	1.41969e-07	1.00472e-06	study5_Casamino_acid_vs_Glu
1911	C1_01620C_A	927.895	4.00642	0.438199	9.14293	6.07855e-20	1.51521e-18	study5_Casamino_acid_vs_Glu
1912	C4_00210W_A	470.785	-1.08526	0.394167	-2.75331	0.00589961	0.0152429	study5_Casamino_acid_vs_Glu
1913	CR_02640W_A	3079.15	-1.06225	0.225349	-4.71382	2.43121e-06	1.40818e-05	study5_Casamino_acid_vs_Glu
1914	C6_03760C_A	22520.6	1.59039	0.317258	5.01293	5.3606e-07	3.44882e-06	study5_Casamino_acid_vs_Glu
1915	C4_04990C_A	322.594	-1.39299	0.345572	-4.03098	5.55459e-05	0.000239158	study5_Casamino_acid_vs_Glu
1916	C1_07670W_A	107.587	-3.47734	0.775105	-4.48629	7.24738e-06	3.75607e-05	study5_Casamino_acid_vs_Glu
1917	C1_08590C_A	6587.93	-2.41656	0.262077	-9.2208	2.94881e-20	7.54125e-19	study5_Casamino_acid_vs_Glu
1918	C3_04430W_A	11792.4	2.18257	0.275056	7.93499	2.10512e-15	3.6306e-14	study5_Casamino_acid_vs_Glu
1919	C3_05400C_A	98.9033	-1.38488	0.307548	-4.50296	6.70144e-06	3.50857e-05	study5_Casamino_acid_vs_Glu
1920	C5_03350W_A	9289.65	1.58486	0.277419	5.71285	1.11097e-08	9.25245e-08	study5_Casamino_acid_vs_Glu
1921	C3_01400W_A	1803.62	1.10956	0.17492	6.34323	2.24999e-10	2.36403e-09	study5_Casamino_acid_vs_Glu
1922	C5_03970W_A	452.851	-1.80836	0.353843	-5.11061	3.21121e-07	2.13514e-06	study5_Casamino_acid_vs_Glu
1923	C2_06460W_A	1133.89	-1.18036	0.291873	-4.04408	5.25298e-05	0.000227765	study5_Casamino_acid_vs_Glu
1924	CR_02270C_A	568.445	2.14981	0.543349	3.95659	7.60283e-05	0.00031736	study5_Casamino_acid_vs_Glu
1925	C1_08500C_A	199332	-2.61925	0.260908	-10.039	1.02719e-23	3.40023e-22	study5_Casamino_acid_vs_Glu
1926	C6_00930C_A	3837.13	3.77057	0.294202	12.8162	1.3299e-37	8.44146e-36	study5_Casamino_acid_vs_Glu
1927	C1_07120W_A	8143.13	1.00676	0.241553	4.16785	3.0749e-05	0.000141285	study5_Casamino_acid_vs_Glu
1928	C5_04480C_A	58.3709	3.35766	0.588309	5.70731	1.14778e-08	9.51125e-08	study5_Casamino_acid_vs_Glu
1929	C2_05760C_A	3973.74	1.40245	0.159426	8.79684	1.40726e-18	3.19723e-17	study5_Casamino_acid_vs_Glu
1930	C3_05980C_A	2415.26	2.50791	0.322737	7.77074	7.80284e-15	1.27772e-13	study5_Casamino_acid_vs_Glu
1931	C1_05960W_A	3934.45	-2.30889	0.252112	-9.15816	5.27905e-20	1.3321e-18	study5_Casamino_acid_vs_Glu
1932	C1_02490C_A	1488.29	1.16848	0.271629	4.30177	1.69443e-05	8.26017e-05	study5_Casamino_acid_vs_Glu
1933	C5_03670C_A	556.085	1.45552	0.173175	8.40492	4.28164e-17	8.50388e-16	study5_Casamino_acid_vs_Glu
1934	C6_01990W_A	252.698	-6.14955	0.380141	-16.177	7.3268e-59	9.59811e-57	study5_Casamino_acid_vs_Glu
1935	C5_03240W_A	4635.74	1.61973	0.269253	6.01564	1.79181e-09	1.64659e-08	study5_Casamino_acid_vs_Glu
1936	C2_05920C_A	12007.2	1.12758	0.230418	4.89362	9.89993e-07	6.0893e-06	study5_Casamino_acid_vs_Glu
1937	C3_04340W_A	4584.72	-1.3193	0.403328	-3.27102	0.00107159	0.00338174	study5_Casamino_acid_vs_Glu
1938	C2_08330W_A	2528.76	3.38463	0.378347	8.94584	3.69144e-19	8.80939e-18	study5_Casamino_acid_vs_Glu
1939	C2_07060W_A	1974.44	-2.12144	0.224105	-9.46627	2.90014e-21	8.00725e-20	study5_Casamino_acid_vs_Glu
1940	C3_01250W_A	5287.13	1.93145	0.242198	7.97466	1.528e-15	2.71121e-14	study5_Casamino_acid_vs_Glu
1941	CR_02350C_A	2728.44	2.15742	0.271419	7.94864	1.88568e-15	3.27047e-14	study5_Casamino_acid_vs_Glu
1942	C2_08530C_A	285.683	-1.27934	0.387496	-3.30156	0.00096148	0.00307045	study5_Casamino_acid_vs_Glu
1943	C5_00670C_A	7344.1	1.55697	0.377862	4.12048	3.78089e-05	0.000169301	study5_Casamino_acid_vs_Glu
1944	C1_09720W_A	6075.98	-1.01489	0.165903	-6.11733	9.51536e-10	9.09722e-09	study5_Casamino_acid_vs_Glu
1945	C1_00220W_A	9938.07	-1.4083	0.302454	-4.65625	3.22025e-06	1.80575e-05	study5_Casamino_acid_vs_Glu
1946	CR_04060C_A	1848.85	-2.10971	0.220361	-9.57392	1.02929e-21	2.90705e-20	study5_Casamino_acid_vs_Glu
1947	C1_14300C_A	3542.16	1.01022	0.298792	3.381	0.000722217	0.00238941	study5_Casamino_acid_vs_Glu
1948	C1_06230C_A	13957.9	4.02492	0.339556	11.8535	2.06392e-32	1.08612e-30	study5_Casamino_acid_vs_Glu
1949	C7_01700W_A	3063.04	1.57127	0.217075	7.23838	4.54087e-13	6.24066e-12	study5_Casamino_acid_vs_Glu
1950	C3_02400C_A	5709.94	1.09126	0.192857	5.6584	1.52788e-08	1.24269e-07	study5_Casamino_acid_vs_Glu
1951	CR_07730W_A	494.711	1.31694	0.22212	5.92894	3.04888e-09	2.72057e-08	study5_Casamino_acid_vs_Glu
1952	C3_05410W_A	3622.19	1.23125	0.219106	5.61942	1.91604e-08	1.53408e-07	study5_Casamino_acid_vs_Glu
1953	C3_05930W_A	3386.91	-1.35691	0.182167	-7.44869	9.42722e-14	1.37218e-12	study5_Casamino_acid_vs_Glu
1954	C5_00500W_A	3705.25	-1.27257	0.247852	-5.13439	2.83062e-07	1.89231e-06	study5_Casamino_acid_vs_Glu
1955	C1_05770C_A	1750.69	1.2695	0.298991	4.24594	2.17676e-05	0.000104136	study5_Casamino_acid_vs_Glu
1956	C7_03200C_A	1257.55	-1.92283	0.264155	-7.27919	3.35837e-13	4.65709e-12	study5_Casamino_acid_vs_Glu
1957	CR_09690C_A	3376.1	1.59142	0.179788	8.85167	8.62166e-19	2.00315e-17	study5_Casamino_acid_vs_Glu
1958	C6_02780C_A	2454.84	1.53088	0.224372	6.82295	8.91877e-12	1.08309e-10	study5_Casamino_acid_vs_Glu
1959	C7_01440W_A	303.517	1.32816	0.292422	4.54192	5.57442e-06	2.969e-05	study5_Casamino_acid_vs_Glu
1960	CR_02360W_A	22842.7	6.34265	0.281786	22.5088	3.40364e-112	1.90511e-109	study5_Casamino_acid_vs_Glu
1961	C5_05050W_A	191083	-1.71007	0.382986	-4.46509	8.00365e-06	4.12372e-05	study5_Casamino_acid_vs_Glu
1962	C5_03880C_A	49.6225	1.40241	0.570066	2.46009	0.0138902	0.032236	study5_Casamino_acid_vs_Glu
1963	C2_06680W_A	14791.6	5.25338	0.245869	21.3666	2.73398e-101	1.40276e-98	study5_Casamino_acid_vs_Glu
1964	C7_00060C_A	1916.63	1.3096	0.226214	5.7892	7.07243e-09	6.13309e-08	study5_Casamino_acid_vs_Glu
1965	C6_02890C_A	3118.48	7.3935	0.316427	23.3656	9.57276e-121	7.36744e-118	study5_Casamino_acid_vs_Glu
1966	C3_03810W_A	1053.87	-1.19764	0.302155	-3.96367	7.38068e-05	0.000309374	study5_Casamino_acid_vs_Glu
1967	C5_03510C_A	4907.67	-4.49515	0.33368	-13.4714	2.30387e-41	1.70571e-39	study5_Casamino_acid_vs_Glu
1968	C7_00680W_A	240.081	-1.35777	0.277168	-4.89874	9.64532e-07	5.94457e-06	study5_Casamino_acid_vs_Glu
1969	C7_02240W_A	745.123	4.12134	0.4464	9.23239	2.64663e-20	6.81812e-19	study5_Casamino_acid_vs_Glu
1970	C1_10310W_A	544.89	1.17935	0.211427	5.57806	2.4321e-08	1.91734e-07	study5_Casamino_acid_vs_Glu
1971	C1_11680C_A	2079.69	2.75843	0.303357	9.093	9.63474e-20	2.36339e-18	study5_Casamino_acid_vs_Glu
1972	C4_02540W_A	2804.73	2.31941	0.285394	8.12706	4.39824e-16	8.18126e-15	study5_Casamino_acid_vs_Glu
1973	C1_03270W_A	629.466	1.5164	0.339996	4.46006	8.19377e-06	4.21111e-05	study5_Casamino_acid_vs_Glu
1974	C4_02420C_A	544.052	-1.17693	0.199624	-5.89574	3.73016e-09	3.29035e-08	study5_Casamino_acid_vs_Glu
1975	C1_08460C_A	3170.55	-2.32867	0.258201	-9.01884	1.90085e-19	4.58963e-18	study5_Casamino_acid_vs_Glu
1976	CR_03840C_A	192.936	-1.58637	0.378595	-4.19016	2.78757e-05	0.000129931	study5_Casamino_acid_vs_Glu
1977	C1_02130C_A	7066.42	2.26952	0.484467	4.68458	2.80529e-06	1.59928e-05	study5_Casamino_acid_vs_Glu
1978	C4_02030W_A	526.828	1.15723	0.285122	4.05872	4.93422e-05	0.00021592	study5_Casamino_acid_vs_Glu
1979	C4_01320C_A	1060.54	1.56145	0.220329	7.08688	1.37166e-12	1.80841e-11	study5_Casamino_acid_vs_Glu
1980	C4_04140W_A	839.331	1.73081	0.223116	7.75746	8.66496e-15	1.41291e-13	study5_Casamino_acid_vs_Glu
1981	C1_02520W_A	599.974	5.77666	0.592672	9.74681	1.90354e-22	5.71712e-21	study5_Casamino_acid_vs_Glu
1982	C4_04830W_A	1319.1	-1.13879	0.241973	-4.70625	2.52321e-06	1.45872e-05	study5_Casamino_acid_vs_Glu
1983	CR_07620W_A	13591.1	1.39711	0.297399	4.69774	2.63052e-06	1.50942e-05	study5_Casamino_acid_vs_Glu
1984	C3_05450C_A	1856.7	1.94877	0.310663	6.27295	3.54267e-10	3.61728e-09	study5_Casamino_acid_vs_Glu
1985	CR_09560C_A	401.427	1.2641	0.219314	5.76386	8.22114e-09	7.0498e-08	study5_Casamino_acid_vs_Glu
1986	C3_04270C_A	1782.26	-3.15915	0.422289	-7.48103	7.37407e-14	1.08618e-12	study5_Casamino_acid_vs_Glu
1987	C5_02110W_A	2369.05	2.2198	0.385374	5.76012	8.4054e-09	7.19778e-08	study5_Casamino_acid_vs_Glu
1988	C3_01060W_A	147.045	3.84334	0.491632	7.81753	5.38718e-15	8.91636e-14	study5_Casamino_acid_vs_Glu
1989	CR_07770C_A	1249.42	1.28521	0.228193	5.63209	1.78035e-08	1.43102e-07	study5_Casamino_acid_vs_Glu
1990	C2_04090W_A	24.0678	1.56651	0.562165	2.78656	0.00532709	0.0140047	study5_Casamino_acid_vs_Glu
1991	C1_08400C_A	15876	3.89557	0.373826	10.4208	1.99218e-25	7.43384e-24	study5_Casamino_acid_vs_Glu
1992	C6_01070C_A	882.766	3.38483	0.440964	7.67598	1.64153e-14	2.58489e-13	study5_Casamino_acid_vs_Glu
1993	C5_01250W_A	1828.65	1.62088	0.231992	6.9868	2.81235e-12	3.59245e-11	study5_Casamino_acid_vs_Glu
1994	CR_02880W_A	500.559	1.01586	0.240939	4.21624	2.48405e-05	0.000117468	study5_Casamino_acid_vs_Glu
1995	C4_06960W_A	339.118	-1.53665	0.298773	-5.14321	2.70077e-07	1.8114e-06	study5_Casamino_acid_vs_Glu
1996	C1_01520C_A	7274.01	1.73444	0.204801	8.46892	2.47679e-17	5.03287e-16	study5_Casamino_acid_vs_Glu
1997	C1_14190C_A	1021.65	2.39102	0.450249	5.31045	1.09355e-07	7.89331e-07	study5_Casamino_acid_vs_Glu
1998	C2_10230W_A	1455.04	-1.17243	0.4632	-2.53115	0.011369	0.0270893	study5_Casamino_acid_vs_Glu
1999	C2_07570W_A	7677.21	-5.71964	0.418091	-13.6804	1.33015e-42	1.02371e-40	study5_Casamino_acid_vs_Glu
[truncated: 40,764 more rows]

## Sheet: UP regulated
NO.	gene	baseMean	log2FoldChange	lfcSE	stat	pvalue	padj	Study
1	C6_04180W_A	1949.74	1.70367	0.192274	8.86061	7.96e-19	2.45e-17	study5_a-Ketoglutarate_vs_Glu
2	CR_01470W_A	18796.6	1.94584	0.246746	7.88603	3.12e-15	6.53e-14	study5_a-Ketoglutarate_vs_Glu
3	CR_01630C_A	329.238	2.10805	0.473806	4.44919	8.62e-06	5.03e-05	study5_a-Ketoglutarate_vs_Glu
4	CR_00300W_A	122.347	4.02203	0.493132	8.15609	3.46e-16	8.13e-15	study5_a-Ketoglutarate_vs_Glu
5	C1_01990W_A	81.24	1.55907	0.579343	2.69111	0.00712156	0.0190226	study5_a-Ketoglutarate_vs_Glu
6	C2_05160C_A	1783.95	1.34612	0.350983	3.83528	0.00012542	0.00056079	study5_a-Ketoglutarate_vs_Glu
7	C2_09120C_A	90.6746	1.03612	0.379116	2.733	0.00627601	0.0170602	study5_a-Ketoglutarate_vs_Glu
8	C2_03080W_A	10726.4	1.87449	0.313941	5.97084	2.36e-09	2.55e-08	study5_a-Ketoglutarate_vs_Glu
9	CR_00610W_A	704.35	2.00786	0.25141	7.9864	1.39e-15	3.03e-14	study5_a-Ketoglutarate_vs_Glu
10	CR_08870W_A	2570.77	1.00884	0.164867	6.11908	9.41e-10	1.07e-08	study5_a-Ketoglutarate_vs_Glu
11	CR_00930W_A	3865.76	6.61284	0.600954	11.0039	3.66e-28	2.19e-26	study5_a-Ketoglutarate_vs_Glu
12	C5_00540C_A	722.277	10.2597	1.50159	6.83258	8.34e-12	1.22e-10	study5_a-Ketoglutarate_vs_Glu
13	CR_10140W_A	8547.83	2.50287	0.240042	10.4268	1.87e-25	9.14e-24	study5_a-Ketoglutarate_vs_Glu
14	C2_10280C_A	9776.81	1.08369	0.209514	5.17241	2.31e-07	1.84e-06	study5_a-Ketoglutarate_vs_Glu
15	CR_09570W_A	845.507	1.53728	0.268849	5.71799	1.08e-08	1.05e-07	study5_a-Ketoglutarate_vs_Glu
16	C7_01070C_A	3443.31	1.11238	0.233399	4.76602	1.88e-06	1.26e-05	study5_a-Ketoglutarate_vs_Glu
17	CR_06660W_A	3591.47	3.09394	0.342888	9.02319	1.83e-19	5.95e-18	study5_a-Ketoglutarate_vs_Glu
18	C2_08650W_A	3865.76	1.546	0.18804	8.22168	2.01e-16	4.92e-15	study5_a-Ketoglutarate_vs_Glu
19	C1_03940W_A	7444.33	2.23726	0.208462	10.7322	7.18e-27	3.95e-25	study5_a-Ketoglutarate_vs_Glu
20	CR_05730C_A	3867.2	1.76172	0.365518	4.81979	1.44e-06	9.84e-06	study5_a-Ketoglutarate_vs_Glu
21	C1_01440C_A	150.87	2.46968	0.359537	6.86905	6.46e-12	9.57e-11	study5_a-Ketoglutarate_vs_Glu
22	C1_07980C_A	1688.98	2.04263	0.401671	5.08534	3.67e-07	2.82e-06	study5_a-Ketoglutarate_vs_Glu
23	C7_04180W_A	2588.97	2.03837	0.226863	8.98502	2.59e-19	8.17e-18	study5_a-Ketoglutarate_vs_Glu
24	C1_05060W_A	1286.55	1.23463	0.398061	3.10162	0.00192462	0.00622367	study5_a-Ketoglutarate_vs_Glu
25	C2_04170C_A	6752.59	1.23906	0.18669	6.63698	3.2e-11	4.34e-10	study5_a-Ketoglutarate_vs_Glu
26	C1_05080W_A	225.714	1.21059	0.3823	3.16659	0.00154238	0.00514265	study5_a-Ketoglutarate_vs_Glu
27	C2_01750C_A	5478.19	2.2962	0.270873	8.47705	2.31e-17	6.21e-16	study5_a-Ketoglutarate_vs_Glu
28	C2_01890W_A	1458.17	1.84206	0.354121	5.20178	1.97e-07	1.59e-06	study5_a-Ketoglutarate_vs_Glu
29	C3_07760C_A	393.12	1.40247	0.268496	5.22344	1.76e-07	1.44e-06	study5_a-Ketoglutarate_vs_Glu
30	C7_01130C_A	190.376	1.54372	0.388671	3.97179	7.13e-05	0.000337589	study5_a-Ketoglutarate_vs_Glu
31	C7_01510W_A	6052.83	4.42029	0.375602	11.7685	5.67e-32	3.97e-30	study5_a-Ketoglutarate_vs_Glu
32	C1_13550C_A	1666.15	1.02729	0.221677	4.63418	3.58e-06	2.28e-05	study5_a-Ketoglutarate_vs_Glu
33	CR_01300W_A	2549.76	1.67835	0.241777	6.94172	3.87e-12	5.99e-11	study5_a-Ketoglutarate_vs_Glu
34	C5_00640C_A	2158.73	1.71094	0.21165	8.0838	6.28e-16	1.43e-14	study5_a-Ketoglutarate_vs_Glu
35	C2_02600C_A	186.904	2.60844	0.315571	8.2658	1.39e-16	3.47e-15	study5_a-Ketoglutarate_vs_Glu
36	C3_07070C_A	2112.74	3.42014	0.32628	10.4822	1.04e-25	5.22e-24	study5_a-Ketoglutarate_vs_Glu
37	C2_02540W_A	2570.66	1.02545	0.423214	2.42301	0.0153926	0.0366482	study5_a-Ketoglutarate_vs_Glu
38	C3_03710W_A	1070.08	1.98887	0.26278	7.56856	3.77e-14	7.11e-13	study5_a-Ketoglutarate_vs_Glu
39	C3_04080W_A	9066.42	1.98639	0.242709	8.18428	2.74e-16	6.61e-15	study5_a-Ketoglutarate_vs_Glu
40	C1_04460C_A	1242.07	1.1384	0.354245	3.2136	0.00131083	0.00444425	study5_a-Ketoglutarate_vs_Glu
41	C6_01050W_A	1376.86	1.01961	0.246634	4.13409	3.56e-05	0.000182387	study5_a-Ketoglutarate_vs_Glu
42	C1_12570C_A	1767.96	1.33519	0.178349	7.48637	7.08e-14	1.3e-12	study5_a-Ketoglutarate_vs_Glu
43	C1_02270C_A	2295.02	2.26076	0.208176	10.8598	1.79e-27	1.03e-25	study5_a-Ketoglutarate_vs_Glu
44	C5_02890W_A	10433.9	1.66427	0.244584	6.8045	1.01e-11	1.46e-10	study5_a-Ketoglutarate_vs_Glu
45	C1_12020W_A	12.0129	2.24823	0.759363	2.96067	0.00306966	0.00925106	study5_a-Ketoglutarate_vs_Glu
46	C1_10030W_A	1520.51	1.56423	0.379335	4.12361	3.73e-05	0.000189634	study5_a-Ketoglutarate_vs_Glu
47	C3_07180C_A	1493.05	1.37576	0.301264	4.56662	4.96e-06	3.05e-05	study5_a-Ketoglutarate_vs_Glu
48	C2_05250C_A	18756.6	2.52655	0.347946	7.26131	3.83e-13	6.59e-12	study5_a-Ketoglutarate_vs_Glu
49	CR_06640C_A	3558.98	1.43939	0.174597	8.24405	1.66e-16	4.1e-15	study5_a-Ketoglutarate_vs_Glu
50	C1_13470W_A	1065.91	1.63079	0.226966	7.18518	6.71e-13	1.12e-11	study5_a-Ketoglutarate_vs_Glu
51	C7_01750W_A	542.838	2.01919	0.252406	7.99974	1.25e-15	2.74e-14	study5_a-Ketoglutarate_vs_Glu
52	CR_05940W_A	45.8652	1.0602	0.43269	2.45025	0.0142757	0.0343879	study5_a-Ketoglutarate_vs_Glu
53	C2_08700C_A	1587.97	1.12795	0.204856	5.50609	3.67e-08	3.3e-07	study5_a-Ketoglutarate_vs_Glu
54	C6_01720C_A	8307.91	1.69545	0.220927	7.67423	1.66e-14	3.32e-13	study5_a-Ketoglutarate_vs_Glu
55	C6_00250W_A	2820.89	1.11927	0.224741	4.98025	6.35e-07	4.69e-06	study5_a-Ketoglutarate_vs_Glu
56	C2_09080C_A	4.0441	4.46365	1.82435	2.44671	0.0144166	0.0346866	study5_a-Ketoglutarate_vs_Glu
57	C5_05240C_A	44.4325	1.76048	0.478435	3.67966	0.000233548	0.000968971	study5_a-Ketoglutarate_vs_Glu
58	C4_02200C_A	595.904	1.37682	0.248241	5.54631	2.92e-08	2.67e-07	study5_a-Ketoglutarate_vs_Glu
59	CR_04540C_A	511.366	1.16744	0.26119	4.46971	7.83e-06	4.63e-05	study5_a-Ketoglutarate_vs_Glu
60	C2_00480C_A	1212.6	1.76297	0.452917	3.89247	9.92e-05	0.000452222	study5_a-Ketoglutarate_vs_Glu
61	C1_04360C_A	9352.98	1.65448	0.265384	6.23429	4.54e-10	5.44e-09	study5_a-Ketoglutarate_vs_Glu
62	C1_05930C_A	2450.4	1.49683	0.33026	4.53228	5.84e-06	3.55e-05	study5_a-Ketoglutarate_vs_Glu
63	C3_00920W_A	5518.34	10.1891	0.51953	19.6121	1.22e-85	3.95e-83	study5_a-Ketoglutarate_vs_Glu
64	C2_08340C_A	103.781	3.50806	0.470033	7.46344	8.43e-14	1.53e-12	study5_a-Ketoglutarate_vs_Glu
65	C5_03330C_A	1465.31	1.30973	0.161568	8.10638	5.22e-16	1.2e-14	study5_a-Ketoglutarate_vs_Glu
66	C1_10140C_A	1694.79	1.83737	0.297806	6.1697	6.84e-10	7.95e-09	study5_a-Ketoglutarate_vs_Glu
67	C1_13250W_A	1761.9	1.75167	0.243468	7.19468	6.26e-13	1.05e-11	study5_a-Ketoglutarate_vs_Glu
68	C4_06390W_A	1442.46	1.01461	0.358336	2.83144	0.00463385	0.0131296	study5_a-Ketoglutarate_vs_Glu
69	C3_03870C_A	3711.65	1.16011	0.257207	4.51042	6.47e-06	3.91e-05	study5_a-Ketoglutarate_vs_Glu
70	C4_00130W_A	35511.8	2.25483	0.305334	7.38479	1.53e-13	2.7e-12	study5_a-Ketoglutarate_vs_Glu
71	C3_04900W_A	2084.57	1.13327	0.355684	3.18616	0.00144173	0.00483219	study5_a-Ketoglutarate_vs_Glu
72	C4_06540W_A	4646.94	2.29558	0.207427	11.0669	1.82e-28	1.14e-26	study5_a-Ketoglutarate_vs_Glu
73	CR_09140C_A	4902.3	1.84967	0.401024	4.61237	3.98e-06	2.5e-05	study5_a-Ketoglutarate_vs_Glu
74	C1_11200W_A	14996.5	1.00365	0.337765	2.97145	0.00296399	0.00900311	study5_a-Ketoglutarate_vs_Glu
75	C1_12590W_A	3417.64	1.04389	0.18973	5.50194	3.76e-08	3.37e-07	study5_a-Ketoglutarate_vs_Glu
76	CR_02750C_A	236.288	3.0255	0.440259	6.87209	6.33e-12	9.41e-11	study5_a-Ketoglutarate_vs_Glu
77	CR_06490C_A	13583.2	1.17261	0.37206	3.15167	0.00162341	0.00537384	study5_a-Ketoglutarate_vs_Glu
78	C2_03470C_A	16716.8	1.0591	0.245509	4.31389	1.6e-05	8.87e-05	study5_a-Ketoglutarate_vs_Glu
79	C6_00070C_A	2640.59	1.90978	0.27725	6.88829	5.65e-12	8.48e-11	study5_a-Ketoglutarate_vs_Glu
80	C7_01900W_A	6322.28	2.05339	0.233248	8.80346	1.33e-18	3.95e-17	study5_a-Ketoglutarate_vs_Glu
81	C2_06070W_A	2691.92	1.56785	0.221681	7.07257	1.52e-12	2.43e-11	study5_a-Ketoglutarate_vs_Glu
82	C3_01930W_A	8358.94	6.55155	0.301495	21.7302	1.06e-104	5.45e-102	study5_a-Ketoglutarate_vs_Glu
83	C3_05650W_A	7214.94	1.0459	0.302254	3.46033	0.000539516	0.00203916	study5_a-Ketoglutarate_vs_Glu
84	CR_02710W_A	739.847	1.09098	0.352619	3.09393	0.00197525	0.00635404	study5_a-Ketoglutarate_vs_Glu
85	C2_00400C_A	5699.69	2.11677	0.222613	9.50878	1.93e-21	6.95e-20	study5_a-Ketoglutarate_vs_Glu
86	CR_04530W_A	3604.17	2.00312	0.248519	8.06025	7.61e-16	1.72e-14	study5_a-Ketoglutarate_vs_Glu
87	C4_01300W_A	10013.4	2.07851	0.24007	8.65794	4.8e-18	1.38e-16	study5_a-Ketoglutarate_vs_Glu
88	C7_01200C_A	1472.81	1.32768	0.380662	3.48781	0.000486987	0.00185888	study5_a-Ketoglutarate_vs_Glu
89	C3_02940C_A	5132.18	1.6791	0.21179	7.92815	2.22e-15	4.72e-14	study5_a-Ketoglutarate_vs_Glu
90	C3_03460C_A	250.25	1.78192	0.37812	4.71258	2.45e-06	1.6e-05	study5_a-Ketoglutarate_vs_Glu
91	CR_10790W_A	1687.39	2.2345	0.363538	6.14655	7.92e-10	9.11e-09	study5_a-Ketoglutarate_vs_Glu
92	C1_02890C_A	746.556	1.45062	0.271575	5.3415	9.22e-08	7.83e-07	study5_a-Ketoglutarate_vs_Glu
93	C1_10050W_A	76.7952	1.8745	0.563758	3.325	0.000884189	0.00313954	study5_a-Ketoglutarate_vs_Glu
94	C1_05830W_A	88.8853	6.7833	0.834076	8.13271	4.2e-16	9.75e-15	study5_a-Ketoglutarate_vs_Glu
95	C3_02950C_A	3966.62	1.02816	0.256742	4.00466	6.21e-05	0.000299447	study5_a-Ketoglutarate_vs_Glu
96	C1_12160W_A	2299.65	1.29777	0.240853	5.38823	7.12e-08	6.11e-07	study5_a-Ketoglutarate_vs_Glu
97	C3_06450W_A	1323.56	3.96821	0.248403	15.9749	1.91e-57	3.1e-55	study5_a-Ketoglutarate_vs_Glu
98	CR_06150C_A	13364.7	1.81104	0.389346	4.6515	3.3e-06	2.11e-05	study5_a-Ketoglutarate_vs_Glu
99	C1_13670W_A	9563.81	2.19688	0.378216	5.80854	6.3e-09	6.31e-08	study5_a-Ketoglutarate_vs_Glu
100	C4_04720W_A	3389.58	1.10711	0.477658	2.31778	0.0204613	0.0464924	study5_a-Ketoglutarate_vs_Glu
101	C3_01320C_A	1968.17	1.85767	0.287454	6.46248	1.03e-10	1.33e-09	study5_a-Ketoglutarate_vs_Glu
102	CR_05520W_A	3132.39	1.11764	0.482174	2.31792	0.0204535	0.0464924	study5_a-Ketoglutarate_vs_Glu
103	C1_07150W_A	573.24	1.12557	0.444762	2.53073	0.0113825	0.0283618	study5_a-Ketoglutarate_vs_Glu
104	C6_03130W_A	3602.59	1.14947	0.187794	6.1209	9.3e-10	1.06e-08	study5_a-Ketoglutarate_vs_Glu
105	C1_08350C_A	21765	2.6476	0.928584	2.85122	0.00435514	0.0124777	study5_a-Ketoglutarate_vs_Glu
106	C5_05430W_A	1128.63	2.69766	0.335939	8.0302	9.73e-16	2.17e-14	study5_a-Ketoglutarate_vs_Glu
107	CR_10410C_A	1218.92	1.12371	0.338509	3.31959	0.000901492	0.00319409	study5_a-Ketoglutarate_vs_Glu
108	CR_06760C_A	19920.6	1.44121	0.314585	4.58131	4.62e-06	2.86e-05	study5_a-Ketoglutarate_vs_Glu
109	C6_02980C_A	5419.01	1.38435	0.152407	9.08325	1.05e-19	3.51e-18	study5_a-Ketoglutarate_vs_Glu
110	C2_09140C_A	7457.37	2.19313	0.35738	6.13668	8.43e-10	9.64e-09	study5_a-Ketoglutarate_vs_Glu
111	C3_04930C_A	2424.34	2.08861	0.221252	9.43998	3.73e-21	1.31e-19	study5_a-Ketoglutarate_vs_Glu
112	C4_02900C_A	2631.01	1.48612	0.501287	2.96461	0.00303069	0.00914705	study5_a-Ketoglutarate_vs_Glu
113	C3_02800W_A	15.6202	2.62406	0.794485	3.30285	0.000957075	0.00336919	study5_a-Ketoglutarate_vs_Glu
114	C1_12250C_A	2841.8	1.2824	0.329676	3.88989	0.00010029	0.000456718	study5_a-Ketoglutarate_vs_Glu
115	C2_06290C_A	7455.11	1.39029	0.191649	7.25432	4.04e-13	6.92e-12	study5_a-Ketoglutarate_vs_Glu
116	C1_11260C_A	104.873	1.68401	0.454558	3.70471	0.000211633	0.000884608	study5_a-Ketoglutarate_vs_Glu
117	C2_08660C_A	334.354	1.3672	0.260936	5.23959	1.61e-07	1.32e-06	study5_a-Ketoglutarate_vs_Glu
118	C3_07060W_A	6800.24	1.2998	0.22476	5.78307	7.33e-09	7.25e-08	study5_a-Ketoglutarate_vs_Glu
119	CR_09210W_A	1477.61	1.06521	0.217643	4.8943	9.87e-07	7e-06	study5_a-Ketoglutarate_vs_Glu
120	C5_01400W_A	424.229	1.68907	0.40613	4.15895	3.2e-05	0.000164862	study5_a-Ketoglutarate_vs_Glu
121	CR_07420W_A	15516.4	2.8671	0.201426	14.234	5.63e-46	6.8e-44	study5_a-Ketoglutarate_vs_Glu
122	C1_05150C_A	32.0967	1.86986	0.605333	3.08898	0.00200847	0.00645077	study5_a-Ketoglutarate_vs_Glu
123	C4_03830W_A	1200.53	1.33876	0.406015	3.29731	0.000976149	0.00343045	study5_a-Ketoglutarate_vs_Glu
124	C5_03600W_A	2414.28	1.08548	0.446217	2.43263	0.0149895	0.0358409	study5_a-Ketoglutarate_vs_Glu
125	C4_04400C_A	649.293	5.12294	0.342128	14.9738	1.09e-50	1.4e-48	study5_a-Ketoglutarate_vs_Glu
126	C3_00850C_A	24055.3	1.37905	0.231096	5.96743	2.41e-09	2.6e-08	study5_a-Ketoglutarate_vs_Glu
127	CR_07140C_A	357.709	1.35766	0.421309	3.22248	0.00127086	0.00432542	study5_a-Ketoglutarate_vs_Glu
128	C5_05230C_A	20595.3	1.84226	0.275231	6.69351	2.18e-11	2.99e-10	study5_a-Ketoglutarate_vs_Glu
129	CR_04740C_A	6499.55	1.24646	0.414167	3.00954	0.0026164	0.00809099	study5_a-Ketoglutarate_vs_Glu
130	C4_00520W_A	1214.22	1.43688	0.339778	4.22888	2.35e-05	0.000125086	study5_a-Ketoglutarate_vs_Glu
131	C6_03850C_A	4760.78	2.36396	0.402033	5.88003	4.1e-09	4.24e-08	study5_a-Ketoglutarate_vs_Glu
132	C5_04130C_A	13949.2	1.46336	0.406952	3.59591	0.00032326	0.00129578	study5_a-Ketoglutarate_vs_Glu
133	CR_00620C_A	9079.2	3.14045	0.531572	5.90785	3.47e-09	3.65e-08	study5_a-Ketoglutarate_vs_Glu
134	C1_06810W_A	19820.9	4.16361	0.318173	13.086	3.96e-39	4e-37	study5_a-Ketoglutarate_vs_Glu
135	C4_00960W_A	1651.38	2.17316	0.252349	8.61173	7.2e-18	2.01e-16	study5_a-Ketoglutarate_vs_Glu
136	C2_04670W_A	138.156	2.42178	0.415802	5.82437	5.73e-09	5.76e-08	study5_a-Ketoglutarate_vs_Glu
137	CR_08880C_A	48.6398	1.89993	0.75506	2.51626	0.0118607	0.0294225	study5_a-Ketoglutarate_vs_Glu
138	C1_09110W_A	873.051	1.0071	0.21316	4.72463	2.31e-06	1.51e-05	study5_a-Ketoglutarate_vs_Glu
139	C1_12280C_A	595.529	1.14282	0.340459	3.35671	0.000788745	0.00285329	study5_a-Ketoglutarate_vs_Glu
140	C1_13410W_A	1680.03	1.75011	0.158702	11.0277	2.81e-28	1.73e-26	study5_a-Ketoglutarate_vs_Glu
141	C1_11760C_A	2346.26	1.4185	0.148334	9.56292	1.14e-21	4.2e-20	study5_a-Ketoglutarate_vs_Glu
142	C1_01630W_A	3440.25	1.39684	0.305918	4.56606	4.97e-06	3.06e-05	study5_a-Ketoglutarate_vs_Glu
143	C6_02290C_A	1048.98	1.08674	0.399078	2.72313	0.00646661	0.0175011	study5_a-Ketoglutarate_vs_Glu
144	C6_00080C_A	2269.59	1.57539	0.268384	5.8699	4.36e-09	4.48e-08	study5_a-Ketoglutarate_vs_Glu
145	C1_07600W_A	3944.95	1.84605	0.231483	7.97487	1.53e-15	3.32e-14	study5_a-Ketoglutarate_vs_Glu
146	C1_05890W_A	1583.93	7.84755	0.505597	15.5214	2.49e-54	3.73e-52	study5_a-Ketoglutarate_vs_Glu
147	C5_02660C_A	3476.87	1.08182	0.280188	3.86107	0.000112893	0.0005081	study5_a-Ketoglutarate_vs_Glu
148	C2_03710W_A	22.5725	3.85859	0.975797	3.9543	7.68e-05	0.000359942	study5_a-Ketoglutarate_vs_Glu
149	C7_00400W_A	4431.02	2.88758	0.229429	12.5859	2.52e-36	2.13e-34	study5_a-Ketoglutarate_vs_Glu
150	CR_08700C_A	1699.91	1.18055	0.337883	3.49398	0.000475878	0.00182213	study5_a-Ketoglutarate_vs_Glu
151	C6_02040W_A	14108.1	1.05034	0.143193	7.33515	2.21e-13	3.84e-12	study5_a-Ketoglutarate_vs_Glu
152	CR_01200W_A	413.659	2.65622	0.271438	9.78572	1.3e-22	5.12e-21	study5_a-Ketoglutarate_vs_Glu
153	C2_02430W_A	1301.64	1.30896	0.422802	3.09593	0.00196198	0.00631795	study5_a-Ketoglutarate_vs_Glu
154	C7_03280C_A	4837.32	3.42802	0.298414	11.4875	1.53e-30	1.03e-28	study5_a-Ketoglutarate_vs_Glu
155	C1_01980W_A	9721.58	4.79417	0.357243	13.4199	4.62e-41	4.99e-39	study5_a-Ketoglutarate_vs_Glu
156	C6_03370W_A	28095.7	4.12499	0.263797	15.637	4.08e-55	6.27e-53	study5_a-Ketoglutarate_vs_Glu
157	C1_05180C_A	1661.79	1.55234	0.217372	7.14138	9.24e-13	1.52e-11	study5_a-Ketoglutarate_vs_Glu
158	C2_03520C_A	23571.8	1.77363	0.200894	8.8287	1.06e-18	3.21e-17	study5_a-Ketoglutarate_vs_Glu
159	CR_08670C_A	1343.01	2.40039	0.308952	7.76946	7.88e-15	1.6e-13	study5_a-Ketoglutarate_vs_Glu
160	C3_00210C_A	392.315	1.28154	0.248281	5.16163	2.45e-07	1.93e-06	study5_a-Ketoglutarate_vs_Glu
161	C7_00930W_A	25830.2	1.35919	0.385713	3.52385	0.000425326	0.00164804	study5_a-Ketoglutarate_vs_Glu
162	CR_06670W_A	131.39	8.15662	0.999328	8.1621	3.29e-16	7.77e-15	study5_a-Ketoglutarate_vs_Glu
163	C2_08140C_A	6327.25	1.3643	0.239547	5.69535	1.23e-08	1.19e-07	study5_a-Ketoglutarate_vs_Glu
164	C4_00120W_A	2407.81	1.13997	0.266145	4.28326	1.84e-05	0.000100173	study5_a-Ketoglutarate_vs_Glu
165	C2_01760C_A	209.813	1.11205	0.235353	4.72505	2.3e-06	1.51e-05	study5_a-Ketoglutarate_vs_Glu
166	C5_03060C_A	932.244	5.54911	0.424951	13.0582	5.7e-39	5.66e-37	study5_a-Ketoglutarate_vs_Glu
167	C4_00980C_A	39.4445	1.87894	0.530104	3.54447	0.000393408	0.00154379	study5_a-Ketoglutarate_vs_Glu
168	C3_05630W_A	173.927	3.88241	0.624075	6.22106	4.94e-10	5.84e-09	study5_a-Ketoglutarate_vs_Glu
169	C3_00990C_A	40.1567	1.68076	0.571814	2.93935	0.003289	0.00984463	study5_a-Ketoglutarate_vs_Glu
170	C3_06220C_A	41.4679	1.8805	0.485395	3.87416	0.000106993	0.000482607	study5_a-Ketoglutarate_vs_Glu
171	CR_08550W_A	4282.86	1.58816	0.242565	6.54737	5.86e-11	7.75e-10	study5_a-Ketoglutarate_vs_Glu
172	C1_08330C_A	18329.1	3.71755	0.245274	15.1567	6.84e-52	9.15e-50	study5_a-Ketoglutarate_vs_Glu
173	C1_02120C_A	48598.2	2.08816	0.333166	6.26764	3.67e-10	4.43e-09	study5_a-Ketoglutarate_vs_Glu
174	C4_06610C_A	17243	3.15214	0.249687	12.6244	1.55e-36	1.33e-34	study5_a-Ketoglutarate_vs_Glu
175	C1_11620W_A	229.81	1.03953	0.337142	3.08337	0.0020467	0.00654965	study5_a-Ketoglutarate_vs_Glu
176	C1_13850C_A	90.0088	1.7708	0.407706	4.34332	1.4e-05	7.9e-05	study5_a-Ketoglutarate_vs_Glu
177	C5_03870C_A	2014.52	1.6687	0.195765	8.52399	1.54e-17	4.18e-16	study5_a-Ketoglutarate_vs_Glu
178	C1_11100W_A	1367.83	1.49845	0.20483	7.31556	2.56e-13	4.42e-12	study5_a-Ketoglutarate_vs_Glu
179	C1_13730C_A	358.545	1.19889	0.482246	2.48606	0.0129168	0.0315966	study5_a-Ketoglutarate_vs_Glu
180	C1_06340W_A	47.6481	1.32382	0.415849	3.18341	0.00145552	0.00487575	study5_a-Ketoglutarate_vs_Glu
181	C1_09100W_A	373.24	1.96976	0.259461	7.59176	3.16e-14	6e-13	study5_a-Ketoglutarate_vs_Glu
182	C1_07960W_A	424.797	1.56317	0.393725	3.97021	7.18e-05	0.000339582	study5_a-Ketoglutarate_vs_Glu
183	C6_03600C_A	188.698	2.3795	0.677333	3.51304	0.000443005	0.00171223	study5_a-Ketoglutarate_vs_Glu
184	C1_13080W_A	6522.51	10.3288	0.520399	19.8479	1.15e-87	4.17e-85	study5_a-Ketoglutarate_vs_Glu
185	C5_01810W_A	1579.93	1.03908	0.208646	4.98011	6.35e-07	4.69e-06	study5_a-Ketoglutarate_vs_Glu
186	CR_01310W_A	16478.1	1.32072	0.217997	6.05843	1.37e-09	1.54e-08	study5_a-Ketoglutarate_vs_Glu
187	C2_04120C_A	1688.56	1.26314	0.430502	2.9341	0.00334512	0.00998832	study5_a-Ketoglutarate_vs_Glu
188	C2_03500W_A	4956.51	1.15428	0.185013	6.23891	4.41e-10	5.29e-09	study5_a-Ketoglutarate_vs_Glu
189	C3_04440C_A	55.6888	1.37601	0.4707	2.92333	0.00346304	0.0102905	study5_a-Ketoglutarate_vs_Glu
190	C6_02790C_A	1224.92	1.50874	0.326973	4.61428	3.94e-06	2.49e-05	study5_a-Ketoglutarate_vs_Glu
191	CR_06590C_A	1911.43	2.13219	0.403819	5.28007	1.29e-07	1.08e-06	study5_a-Ketoglutarate_vs_Glu
192	C4_02440C_A	9568.39	1.03489	0.333065	3.10716	0.00188895	0.00613087	study5_a-Ketoglutarate_vs_Glu
193	CR_01280C_A	965.42	1.43306	0.216201	6.62835	3.39e-11	4.57e-10	study5_a-Ketoglutarate_vs_Glu
194	C1_11320C_A	23793.7	8.31607	0.544964	15.2598	1.42e-52	1.98e-50	study5_a-Ketoglutarate_vs_Glu
195	C7_00280W_A	1253.09	3.23353	0.578127	5.59311	2.23e-08	2.08e-07	study5_a-Ketoglutarate_vs_Glu
196	C5_04960W_A	4842.91	2.65973	0.223877	11.8803	1.5e-32	1.08e-30	study5_a-Ketoglutarate_vs_Glu
197	C2_04650C_A	1579.4	1.35584	0.239882	5.65213	1.58e-08	1.51e-07	study5_a-Ketoglutarate_vs_Glu
198	C1_10850W_A	12.686	2.11539	0.785824	2.69194	0.00710376	0.0189917	study5_a-Ketoglutarate_vs_Glu
199	C3_03760W_A	3179.53	1.40984	0.280722	5.02218	5.11e-07	3.83e-06	study5_a-Ketoglutarate_vs_Glu
200	C2_07080C_A	1992.71	1.5092	0.319826	4.71882	2.37e-06	1.56e-05	study5_a-Ketoglutarate_vs_Glu
201	C6_01260W_A	195.692	1.3046	0.345472	3.7763	0.000159178	0.000688728	study5_a-Ketoglutarate_vs_Glu
202	C6_01710C_A	3179.73	1.00272	0.23882	4.19865	2.69e-05	0.000140942	study5_a-Ketoglutarate_vs_Glu
203	CR_03440W_A	76.9227	1.21572	0.377725	3.21854	0.00128847	0.00437808	study5_a-Ketoglutarate_vs_Glu
204	CR_03580C_A	503.503	3.52239	0.468975	7.51083	5.88e-14	1.09e-12	study5_a-Ketoglutarate_vs_Glu
205	CR_09740W_A	1112.19	1.75531	0.314342	5.58409	2.35e-08	2.18e-07	study5_a-Ketoglutarate_vs_Glu
206	C2_06990W_A	1153.35	5.37954	0.295748	18.1896	6.23e-74	1.48e-71	study5_a-Ketoglutarate_vs_Glu
207	CR_06440C_A	2234.22	1.33479	0.162862	8.19582	2.49e-16	6.06e-15	study5_a-Ketoglutarate_vs_Glu
208	C2_10650W_A	473.939	1.30293	0.310535	4.19577	2.72e-05	0.000142498	study5_a-Ketoglutarate_vs_Glu
209	C2_05130W_A	1431.12	1.9378	0.313927	6.17277	6.71e-10	7.83e-09	study5_a-Ketoglutarate_vs_Glu
210	C6_01440C_A	77.9748	3.28369	0.61731	5.31935	1.04e-07	8.76e-07	study5_a-Ketoglutarate_vs_Glu
211	C4_05070C_A	2578.43	1.54023	0.386498	3.98509	6.75e-05	0.00032195	study5_a-Ketoglutarate_vs_Glu
212	C7_03270W_A	2082.73	1.032	0.338941	3.04477	0.00232861	0.00730747	study5_a-Ketoglutarate_vs_Glu
213	C2_10350C_A	19709.3	2.17169	0.289437	7.50316	6.23e-14	1.15e-12	study5_a-Ketoglutarate_vs_Glu
214	C7_00770W_A	3315.44	1.2632	0.391123	3.22969	0.00123927	0.00424134	study5_a-Ketoglutarate_vs_Glu
215	C3_04530C_A	6863.72	2.23136	0.388035	5.75041	8.9e-09	8.77e-08	study5_a-Ketoglutarate_vs_Glu
216	C4_02220C_A	239.355	3.8491	0.505191	7.61909	2.55e-14	4.92e-13	study5_a-Ketoglutarate_vs_Glu
217	C1_09060C_A	1239.16	1.41325	0.214453	6.59003	4.4e-11	5.89e-10	study5_a-Ketoglutarate_vs_Glu
218	C3_04730C_A	17.9479	2.98377	0.769605	3.87701	0.000105747	0.000477336	study5_a-Ketoglutarate_vs_Glu
219	CR_00540C_A	30099.8	5.53284	0.178617	30.9761	1.13e-210	2.32e-207	study5_a-Ketoglutarate_vs_Glu
220	C2_01690W_A	7567.66	2.02558	0.207863	9.74481	1.94e-22	7.61e-21	study5_a-Ketoglutarate_vs_Glu
221	C5_04250W_A	472.089	3.64357	0.898882	4.05345	5.05e-05	0.000249989	study5_a-Ketoglutarate_vs_Glu
222	C6_00610C_A	7.71871	2.64038	1.02412	2.57818	0.00993218	0.0252646	study5_a-Ketoglutarate_vs_Glu
223	C3_03570C_A	12.9963	2.45824	0.906769	2.71099	0.00670821	0.0180439	study5_a-Ketoglutarate_vs_Glu
224	C1_07950C_A	730.813	1.0535	0.30328	3.47369	0.000513363	0.00194869	study5_a-Ketoglutarate_vs_Glu
225	CR_02920C_A	2897.94	4.21528	0.530411	7.9472	1.91e-15	4.12e-14	study5_a-Ketoglutarate_vs_Glu
226	C6_01450C_A	3437.1	5.34072	0.276271	19.3315	2.92e-83	8.17e-81	study5_a-Ketoglutarate_vs_Glu
227	C1_02150W_A	7427.32	3.57718	0.504842	7.08575	1.38e-12	2.22e-11	study5_a-Ketoglutarate_vs_Glu
228	CR_04110W_A	1392.17	1.01416	0.399914	2.53595	0.0112142	0.027999	study5_a-Ketoglutarate_vs_Glu
229	C1_13160W_A	3264.29	1.3892	0.440396	3.15444	0.00160808	0.00533455	study5_a-Ketoglutarate_vs_Glu
230	C7_02010C_A	238.626	3.54354	0.339816	10.4278	1.85e-25	9.12e-24	study5_a-Ketoglutarate_vs_Glu
231	C3_04020C_A	1951.94	1.73589	0.230245	7.53932	4.72e-14	8.84e-13	study5_a-Ketoglutarate_vs_Glu
232	C2_04180C_A	1027.21	1.42056	0.157257	9.03337	1.66e-19	5.48e-18	study5_a-Ketoglutarate_vs_Glu
233	C3_02130W_A	1615	1.03921	0.413863	2.511	0.0120389	0.0297925	study5_a-Ketoglutarate_vs_Glu
234	C3_01170W_A	1950.05	1.04126	0.211963	4.91245	8.99e-07	6.44e-06	study5_a-Ketoglutarate_vs_Glu
235	C2_09830C_A	2558.23	1.23973	0.248331	4.99225	5.97e-07	4.44e-06	study5_a-Ketoglutarate_vs_Glu
236	C1_05160C_A	16852	2.63037	0.381568	6.89358	5.44e-12	8.23e-11	study5_a-Ketoglutarate_vs_Glu
237	CR_07800W_A	303.855	1.58499	0.341588	4.64005	3.48e-06	2.23e-05	study5_a-Ketoglutarate_vs_Glu
238	C5_04750C_A	3261.06	1.05254	0.371033	2.83678	0.00455707	0.0129478	study5_a-Ketoglutarate_vs_Glu
239	C2_01160W_A	1297.15	1.12458	0.182034	6.17786	6.5e-10	7.61e-09	study5_a-Ketoglutarate_vs_Glu
240	CR_01620C_A	50545.4	2.36209	0.318315	7.4206	1.17e-13	2.09e-12	study5_a-Ketoglutarate_vs_Glu
241	C1_09040C_A	817.916	1.06918	0.364161	2.93601	0.0033246	0.00993667	study5_a-Ketoglutarate_vs_Glu
242	C6_03770C_A	2238.02	1.2521	0.197176	6.35017	2.15e-10	2.68e-09	study5_a-Ketoglutarate_vs_Glu
243	C7_02920W_A	1036.19	1.75152	0.356533	4.91266	8.98e-07	6.44e-06	study5_a-Ketoglutarate_vs_Glu
244	C7_00160C_A	1558.23	1.19826	0.320852	3.73462	0.000188	0.000796639	study5_a-Ketoglutarate_vs_Glu
245	CR_09730C_A	1156.84	1.01329	0.346672	2.92291	0.00346778	0.0102996	study5_a-Ketoglutarate_vs_Glu
246	C6_03260W_A	5367.43	1.95252	0.398067	4.90501	9.34e-07	6.67e-06	study5_a-Ketoglutarate_vs_Glu
247	C6_03080C_A	2735.18	1.3862	0.313856	4.41666	1e-05	5.78e-05	study5_a-Ketoglutarate_vs_Glu
248	C7_03570W_A	3343.07	1.52901	0.457387	3.34292	0.000829021	0.00296933	study5_a-Ketoglutarate_vs_Glu
249	C2_00150W_A	1365.44	1.18343	0.163637	7.23203	4.76e-13	8.05e-12	study5_a-Ketoglutarate_vs_Glu
250	C2_04660C_A	4372.97	1.71181	0.241507	7.08803	1.36e-12	2.19e-11	study5_a-Ketoglutarate_vs_Glu
251	C7_00630C_A	89.1037	1.31209	0.440581	2.9781	0.00290044	0.00884936	study5_a-Ketoglutarate_vs_Glu
252	C1_01710W_A	5607.3	1.68553	0.288508	5.84221	5.15e-09	5.21e-08	study5_a-Ketoglutarate_vs_Glu
253	C3_03980C_A	255.201	1.41285	0.229552	6.15484	7.52e-10	8.66e-09	study5_a-Ketoglutarate_vs_Glu
254	CR_09800C_A	3453.82	1.00791	0.412238	2.44497	0.0144863	0.034827	study5_a-Ketoglutarate_vs_Glu
255	C2_03540W_A	4922.01	1.56001	0.198952	7.84113	4.46e-15	9.26e-14	study5_a-Ketoglutarate_vs_Glu
256	C2_02310W_A	3954.54	1.70941	0.167264	10.2198	1.62e-24	7.21e-23	study5_a-Ketoglutarate_vs_Glu
257	C6_02340W_A	12696.8	1.19388	0.247308	4.82748	1.38e-06	9.51e-06	study5_a-Ketoglutarate_vs_Glu
258	C1_03230C_A	2416.16	1.94966	0.377472	5.16506	2.4e-07	1.91e-06	study5_a-Ketoglutarate_vs_Glu
259	C3_02810C_A	1134.29	1.12256	0.307464	3.65103	0.00026119	0.00107569	study5_a-Ketoglutarate_vs_Glu
260	C3_02190C_A	3400.66	1.53837	0.195281	7.87773	3.33e-15	6.96e-14	study5_a-Ketoglutarate_vs_Glu
261	C2_07900W_A	60346	4.28243	0.327136	13.0907	3.72e-39	3.82e-37	study5_a-Ketoglutarate_vs_Glu
262	C2_05770W_A	850.976	1.16053	0.251542	4.61368	3.96e-06	2.49e-05	study5_a-Ketoglutarate_vs_Glu
263	C3_05050W_A	3750.38	9.15458	0.466301	19.6323	8.19e-86	2.8e-83	study5_a-Ketoglutarate_vs_Glu
264	C2_02390W_A	2281.32	1.50897	0.3763	4.01003	6.07e-05	0.000293179	study5_a-Ketoglutarate_vs_Glu
265	C1_12720C_A	40.6215	1.66565	0.508369	3.27646	0.00105117	0.00366897	study5_a-Ketoglutarate_vs_Glu
266	C1_09030C_A	7992.54	1.30824	0.22153	5.90547	3.52e-09	3.69e-08	study5_a-Ketoglutarate_vs_Glu
267	C1_13180W_A	62.7826	1.7436	0.455324	3.82936	0.000128479	0.000571976	study5_a-Ketoglutarate_vs_Glu
268	CR_05180C_A	7252.58	3.16893	0.191603	16.5391	1.92e-61	3.38e-59	study5_a-Ketoglutarate_vs_Glu
269	C6_03360C_A	660.835	1.13139	0.223625	5.05932	4.21e-07	3.21e-06	study5_a-Ketoglutarate_vs_Glu
270	C6_01490C_A	2772.55	5.28028	0.33536	15.7451	7.42e-56	1.17e-53	study5_a-Ketoglutarate_vs_Glu
271	C2_10110W_A	4145.33	1.25771	0.361914	3.47517	0.000510536	0.00193916	study5_a-Ketoglutarate_vs_Glu
272	C4_03820C_A	912.441	1.51694	0.34078	4.45137	8.53e-06	5e-05	study5_a-Ketoglutarate_vs_Glu
273	C4_02610C_A	1244.59	3.2489	0.337562	9.62458	6.3e-22	2.36e-20	study5_a-Ketoglutarate_vs_Glu
274	C5_00930C_A	11559.1	1.1208	0.242408	4.6236	3.77e-06	2.39e-05	study5_a-Ketoglutarate_vs_Glu
275	C1_09290C_A	5229.02	2.97699	0.35344	8.42289	3.67e-17	9.75e-16	study5_a-Ketoglutarate_vs_Glu
276	C4_02710C_A	3082.82	1.79102	0.279435	6.40945	1.46e-10	1.85e-09	study5_a-Ketoglutarate_vs_Glu
277	CR_08420W_A	2787.27	1.27471	0.503886	2.52976	0.0114139	0.0284286	study5_a-Ketoglutarate_vs_Glu
278	C3_07720C_A	2.77322	4.90048	1.97445	2.48195	0.0130665	0.0319122	study5_a-Ketoglutarate_vs_Glu
279	C4_04970C_A	2447.36	1.62148	0.234465	6.91568	4.66e-12	7.08e-11	study5_a-Ketoglutarate_vs_Glu
280	C6_04220C_A	3666.11	2.14072	0.240834	8.88877	6.18e-19	1.91e-17	study5_a-Ketoglutarate_vs_Glu
281	C6_02500C_A	6930.87	1.75941	0.229309	7.67267	1.68e-14	3.35e-13	study5_a-Ketoglutarate_vs_Glu
282	CR_08990C_A	9800.45	1.88771	0.378879	4.98234	6.28e-07	4.65e-06	study5_a-Ketoglutarate_vs_Glu
283	C5_03150W_A	6374.3	1.09238	0.18377	5.94428	2.78e-09	2.96e-08	study5_a-Ketoglutarate_vs_Glu
284	C6_00620W_A	1598.25	2.35521	0.260988	9.02422	1.81e-19	5.93e-18	study5_a-Ketoglutarate_vs_Glu
285	C1_09020W_A	4815.55	1.98461	0.227502	8.72346	2.7e-18	7.84e-17	study5_a-Ketoglutarate_vs_Glu
286	C4_03620C_A	1511.04	1.7233	0.231064	7.4581	8.78e-14	1.59e-12	study5_a-Ketoglutarate_vs_Glu
287	C2_09960W_A	941.74	1.98088	0.199401	9.93413	2.96e-23	1.21e-21	study5_a-Ketoglutarate_vs_Glu
288	CR_06790C_A	636.755	1.70933	0.267146	6.39849	1.57e-10	1.97e-09	study5_a-Ketoglutarate_vs_Glu
289	C1_13880C_A	4012.23	1.53682	0.282719	5.43586	5.45e-08	4.78e-07	study5_a-Ketoglutarate_vs_Glu
290	C4_04530C_A	5734.37	4.74286	0.390152	12.1564	5.3e-34	4.08e-32	study5_a-Ketoglutarate_vs_Glu
291	C3_06030W_A	3052.66	1.66377	0.398408	4.17605	2.97e-05	0.000154374	study5_a-Ketoglutarate_vs_Glu
292	C4_00100C_A	1588.09	1.21707	0.252469	4.82066	1.43e-06	9.81e-06	study5_a-Ketoglutarate_vs_Glu
293	CR_04420C_A	439.614	2.2829	0.324116	7.04344	1.88e-12	2.95e-11	study5_a-Ketoglutarate_vs_Glu
294	C7_00870W_A	525.888	2.09023	0.255899	8.16817	3.13e-16	7.44e-15	study5_a-Ketoglutarate_vs_Glu
295	C2_00600C_A	1696.25	1.93335	0.307912	6.2789	3.41e-10	4.13e-09	study5_a-Ketoglutarate_vs_Glu
296	C3_01810C_A	11096.3	1.04897	0.228457	4.59155	4.4e-06	2.73e-05	study5_a-Ketoglutarate_vs_Glu
297	C4_04040W_A	16.6606	4.41571	1.04048	4.24393	2.2e-05	0.000117593	study5_a-Ketoglutarate_vs_Glu
298	C3_01460C_A	2678.55	1.89152	0.231554	8.16881	3.11e-16	7.43e-15	study5_a-Ketoglutarate_vs_Glu
299	CR_03260W_A	2262.08	1.64365	0.318406	5.16214	2.44e-07	1.93e-06	study5_a-Ketoglutarate_vs_Glu
300	C1_01700W_A	5461.85	1.03495	0.175447	5.89893	3.66e-09	3.82e-08	study5_a-Ketoglutarate_vs_Glu
301	C1_10620W_A	6619.11	1.26171	0.366303	3.44444	0.000572234	0.00214963	study5_a-Ketoglutarate_vs_Glu
302	C3_04630W_A	907.763	1.37271	0.192605	7.12708	1.03e-12	1.68e-11	study5_a-Ketoglutarate_vs_Glu
303	CR_10420W_A	2514.16	1.35482	0.29096	4.65636	3.22e-06	2.06e-05	study5_a-Ketoglutarate_vs_Glu
304	C6_01170W_A	1267.33	2.21309	0.473837	4.67058	3e-06	1.94e-05	study5_a-Ketoglutarate_vs_Glu
305	C2_02190C_A	503.645	1.1706	0.238339	4.91148	9.04e-07	6.46e-06	study5_a-Ketoglutarate_vs_Glu
306	C3_00360W_A	1460.8	1.52061	0.220703	6.88984	5.59e-12	8.41e-11	study5_a-Ketoglutarate_vs_Glu
307	CR_05610C_A	2018.69	2.93247	0.206648	14.1906	1.05e-45	1.24e-43	study5_a-Ketoglutarate_vs_Glu
308	C4_00200C_A	28647.7	2.23127	0.40429	5.51899	3.41e-08	3.08e-07	study5_a-Ketoglutarate_vs_Glu
309	C4_02660W_A	392.27	1.81674	0.257387	7.0584	1.68e-12	2.65e-11	study5_a-Ketoglutarate_vs_Glu
310	C1_07920W_A	1569.7	1.42639	0.228864	6.23249	4.59e-10	5.47e-09	study5_a-Ketoglutarate_vs_Glu
311	C4_03280W_A	10285.5	1.01807	0.266987	3.81319	0.000137187	0.000605491	study5_a-Ketoglutarate_vs_Glu
312	CR_05740C_A	1531.8	1.06179	0.212691	4.99219	5.97e-07	4.44e-06	study5_a-Ketoglutarate_vs_Glu
313	C2_05950C_A	1222.97	1.14209	0.270023	4.22961	2.34e-05	0.000124825	study5_a-Ketoglutarate_vs_Glu
314	C6_02520W_A	5617.85	2.07176	0.23454	8.83331	1.02e-18	3.1e-17	study5_a-Ketoglutarate_vs_Glu
315	C1_05760C_A	242.188	1.52059	0.39146	3.8844	0.000102582	0.000464069	study5_a-Ketoglutarate_vs_Glu
316	C5_04720C_A	1842.93	1.08053	0.256417	4.21394	2.51e-05	0.000132743	study5_a-Ketoglutarate_vs_Glu
317	CR_10240W_A	2054.33	1.21061	0.413783	2.92572	0.00343657	0.0102267	study5_a-Ketoglutarate_vs_Glu
318	C5_00890C_A	1045.37	1.70881	0.366661	4.66046	3.16e-06	2.03e-05	study5_a-Ketoglutarate_vs_Glu
319	C7_03440W_A	1209.78	1.1027	0.222054	4.96591	6.84e-07	5.02e-06	study5_a-Ketoglutarate_vs_Glu
320	C2_08300C_A	15856.5	2.94574	0.402212	7.32386	2.41e-13	4.17e-12	study5_a-Ketoglutarate_vs_Glu
321	C2_01620W_A	9274.89	1.15144	0.253943	4.53425	5.78e-06	3.52e-05	study5_a-Ketoglutarate_vs_Glu
322	C1_00190C_A	1747.5	4.45037	0.386198	11.5235	1e-30	6.87e-29	study5_a-Ketoglutarate_vs_Glu
323	C2_00680C_A	417.678	2.61172	0.491095	5.31815	1.05e-07	8.79e-07	study5_a-Ketoglutarate_vs_Glu
324	C1_06620C_A	135.153	1.29697	0.288926	4.48891	7.16e-06	4.28e-05	study5_a-Ketoglutarate_vs_Glu
325	C2_09380W_A	1304.2	1.36958	0.340682	4.02011	5.82e-05	0.000282238	study5_a-Ketoglutarate_vs_Glu
326	C2_08900W_A	1632.26	1.33637	0.189033	7.06952	1.55e-12	2.46e-11	study5_a-Ketoglutarate_vs_Glu
327	C6_02370C_A	1363.26	1.27036	0.215892	5.88423	4e-09	4.16e-08	study5_a-Ketoglutarate_vs_Glu
328	C3_01200W_A	2127.65	1.01389	0.370697	2.73509	0.00623641	0.0169611	study5_a-Ketoglutarate_vs_Glu
329	C2_01210C_A	3138.17	1.80192	0.297674	6.05333	1.42e-09	1.58e-08	study5_a-Ketoglutarate_vs_Glu
330	CR_03590C_A	76.9936	1.37922	0.369284	3.73484	0.000187835	0.000796486	study5_a-Ketoglutarate_vs_Glu
331	C7_00730W_A	5957.99	1.3353	0.194289	6.87274	6.3e-12	9.39e-11	study5_a-Ketoglutarate_vs_Glu
332	C4_03400W_A	2237.75	1.17893	0.211996	5.56109	2.68e-08	2.47e-07	study5_a-Ketoglutarate_vs_Glu
333	CR_05220C_A	761.707	1.38114	0.31483	4.38695	1.15e-05	6.57e-05	study5_a-Ketoglutarate_vs_Glu
334	C2_07550W_A	7521.29	1.48747	0.194528	7.64658	2.06e-14	4.05e-13	study5_a-Ketoglutarate_vs_Glu
335	C3_05220W_A	10069.3	1.04052	0.197394	5.2713	1.35e-07	1.13e-06	study5_a-Ketoglutarate_vs_Glu
336	C2_00940W_A	1790.88	1.25103	0.39508	3.16653	0.00154271	0.00514265	study5_a-Ketoglutarate_vs_Glu
337	CR_09030C_A	395.166	1.45343	0.212758	6.83141	8.41e-12	1.23e-10	study5_a-Ketoglutarate_vs_Glu
338	C7_02100W_A	5978.55	1.14449	0.132883	8.61274	7.13e-18	2.01e-16	study5_a-Ketoglutarate_vs_Glu
339	C2_08290C_A	86170.3	2.39396	0.406862	5.88396	4.01e-09	4.16e-08	study5_a-Ketoglutarate_vs_Glu
340	C7_01780W_A	9033.83	1.79693	0.288287	6.23315	4.57e-10	5.47e-09	study5_a-Ketoglutarate_vs_Glu
341	C4_06620C_A	275.361	3.5782	0.427793	8.36433	6.05e-17	1.57e-15	study5_a-Ketoglutarate_vs_Glu
342	C1_13100W_A	1367.29	6.38542	1.05917	6.02869	1.65e-09	1.82e-08	study5_a-Ketoglutarate_vs_Glu
343	C1_13870W_A	6786.86	2.49925	0.470509	5.3118	1.09e-07	9.08e-07	study5_a-Ketoglutarate_vs_Glu
344	C1_01620C_A	927.895	4.64189	0.437905	10.6002	2.97e-26	1.54e-24	study5_a-Ketoglutarate_vs_Glu
345	C6_03760C_A	22520.6	1.17649	0.317277	3.70807	0.000208841	0.000874122	study5_a-Ketoglutarate_vs_Glu
346	C2_09320C_A	4707.56	1.16562	0.399102	2.92062	0.00349337	0.0103457	study5_a-Ketoglutarate_vs_Glu
347	C1_07670W_A	107.587	2.81733	0.555575	5.07102	3.96e-07	3.03e-06	study5_a-Ketoglutarate_vs_Glu
348	CR_09100C_A	2230.23	1.04737	0.260175	4.02566	5.68e-05	0.000276753	study5_a-Ketoglutarate_vs_Glu
349	C3_04430W_A	11792.4	2.36814	0.275051	8.60984	7.32e-18	2.04e-16	study5_a-Ketoglutarate_vs_Glu
350	C5_03350W_A	9289.65	1.77681	0.277411	6.40496	1.5e-10	1.9e-09	study5_a-Ketoglutarate_vs_Glu
351	C3_01400W_A	1803.62	1.14394	0.174995	6.53695	6.28e-11	8.26e-10	study5_a-Ketoglutarate_vs_Glu
352	C6_00930C_A	3837.13	3.47665	0.294296	11.8134	3.33e-32	2.38e-30	study5_a-Ketoglutarate_vs_Glu
353	C1_07120W_A	8143.13	2.06116	0.241403	8.53826	1.36e-17	3.71e-16	study5_a-Ketoglutarate_vs_Glu
354	C2_05760C_A	3973.74	1.15656	0.159586	7.24726	4.25e-13	7.25e-12	study5_a-Ketoglutarate_vs_Glu
355	C3_05980C_A	2415.26	1.9507	0.323047	6.03843	1.56e-09	1.72e-08	study5_a-Ketoglutarate_vs_Glu
356	C2_08330W_A	2528.76	3.09553	0.378467	8.17913	2.86e-16	6.88e-15	study5_a-Ketoglutarate_vs_Glu
357	C4_01720C_A	4930.98	1.18009	0.201599	5.85363	4.81e-09	4.9e-08	study5_a-Ketoglutarate_vs_Glu
358	C3_01250W_A	5287.13	1.96092	0.242218	8.09568	5.69e-16	1.3e-14	study5_a-Ketoglutarate_vs_Glu
359	CR_07840C_A	1749.71	1.10343	0.395418	2.79053	0.00526216	0.0146272	study5_a-Ketoglutarate_vs_Glu
360	C1_06540C_A	1206.12	1.09873	0.254556	4.31627	1.59e-05	8.78e-05	study5_a-Ketoglutarate_vs_Glu
361	CR_02350C_A	2728.44	1.5449	0.271696	5.68614	1.3e-08	1.25e-07	study5_a-Ketoglutarate_vs_Glu
362	C5_00670C_A	7344.1	1.73345	0.377856	4.58759	4.48e-06	2.78e-05	study5_a-Ketoglutarate_vs_Glu
363	C1_04590W_A	5255.12	1.18559	0.466824	2.53969	0.011095	0.0277577	study5_a-Ketoglutarate_vs_Glu
364	C3_07300W_A	1063.01	1.67243	0.454316	3.6812	0.000232138	0.000964422	study5_a-Ketoglutarate_vs_Glu
365	C1_06230C_A	13957.9	3.50549	0.339599	10.3225	5.58e-25	2.58e-23	study5_a-Ketoglutarate_vs_Glu
366	C1_13070C_A	1298.94	2.61398	0.384543	6.79763	1.06e-11	1.52e-10	study5_a-Ketoglutarate_vs_Glu
367	CR_07730W_A	494.711	1.60624	0.221576	7.24919	4.19e-13	7.17e-12	study5_a-Ketoglutarate_vs_Glu
368	C3_05410W_A	3622.19	1.40537	0.219084	6.41473	1.41e-10	1.79e-09	study5_a-Ketoglutarate_vs_Glu
369	C1_03740W_A	1021.86	1.31576	0.250179	5.25929	1.45e-07	1.2e-06	study5_a-Ketoglutarate_vs_Glu
370	CR_09690C_A	3376.1	1.20744	0.180011	6.70759	1.98e-11	2.74e-10	study5_a-Ketoglutarate_vs_Glu
371	C7_01440W_A	303.517	1.45602	0.29239	4.97973	6.37e-07	4.7e-06	study5_a-Ketoglutarate_vs_Glu
372	CR_02360W_A	22842.7	6.59107	0.281781	23.3908	5.31e-121	3.27e-118	study5_a-Ketoglutarate_vs_Glu
373	C7_02000C_A	35.6445	5.19362	1.02886	5.04796	4.47e-07	3.39e-06	study5_a-Ketoglutarate_vs_Glu
374	C5_03880C_A	49.6225	1.58718	0.569366	2.78762	0.00530963	0.0147458	study5_a-Ketoglutarate_vs_Glu
375	C2_06680W_A	14791.6	4.37917	0.245943	17.8056	6.39e-71	1.46e-68	study5_a-Ketoglutarate_vs_Glu
376	C6_02890C_A	3118.48	6.4298	0.316714	20.3016	1.25e-91	5.11e-89	study5_a-Ketoglutarate_vs_Glu
377	C6_03830W_A	3519.55	1.04087	0.206136	5.04945	4.43e-07	3.37e-06	study5_a-Ketoglutarate_vs_Glu
378	C7_02240W_A	745.123	3.54495	0.447088	7.92897	2.21e-15	4.71e-14	study5_a-Ketoglutarate_vs_Glu
379	C4_02540W_A	2804.73	2.71021	0.285293	9.49977	2.1e-21	7.53e-20	study5_a-Ketoglutarate_vs_Glu
380	C4_04080C_A	74.3152	1.04813	0.444287	2.35912	0.0183184	0.0425127	study5_a-Ketoglutarate_vs_Glu
381	C1_02130C_A	7066.42	2.862	0.484411	5.90822	3.46e-09	3.65e-08	study5_a-Ketoglutarate_vs_Glu
382	C4_01320C_A	1060.54	1.33358	0.220755	6.04099	1.53e-09	1.7e-08	study5_a-Ketoglutarate_vs_Glu
383	C1_02520W_A	599.974	6.58947	0.591232	11.1453	7.55e-29	4.94e-27	study5_a-Ketoglutarate_vs_Glu
384	C1_03800W_A	567.933	1.20935	0.414046	2.9208	0.0034913	0.0103455	study5_a-Ketoglutarate_vs_Glu
385	CR_07620W_A	13591.1	2.25286	0.297333	7.57689	3.54e-14	6.68e-13	study5_a-Ketoglutarate_vs_Glu
386	C1_10460W_A	1324.98	1.07638	0.240327	4.47884	7.51e-06	4.47e-05	study5_a-Ketoglutarate_vs_Glu
387	C5_02110W_A	2369.05	1.88085	0.385525	4.87867	1.07e-06	7.52e-06	study5_a-Ketoglutarate_vs_Glu
388	C3_01060W_A	147.045	2.10468	0.500926	4.20158	2.65e-05	0.000139245	study5_a-Ketoglutarate_vs_Glu
389	C2_10210C_A	9764.67	1.83515	0.271596	6.7569	1.41e-11	1.98e-10	study5_a-Ketoglutarate_vs_Glu
390	CR_07770C_A	1249.42	1.0335	0.228588	4.52124	6.15e-06	3.73e-05	study5_a-Ketoglutarate_vs_Glu
391	C1_08400C_A	15876	1.58362	0.37395	4.23484	2.29e-05	0.000122133	study5_a-Ketoglutarate_vs_Glu
392	C6_01070C_A	882.766	1.372	0.442619	3.09972	0.00193701	0.00625086	study5_a-Ketoglutarate_vs_Glu
393	C1_01520C_A	7274.01	1.79071	0.204813	8.74314	2.27e-18	6.65e-17	study5_a-Ketoglutarate_vs_Glu
394	C1_06760C_A	1210.89	1.08058	0.39805	2.71469	0.00663376	0.0178827	study5_a-Ketoglutarate_vs_Glu
395	C3_00460W_A	14035.5	1.40157	0.184562	7.59404	3.1e-14	5.91e-13	study5_a-Ketoglutarate_vs_Glu
396	C2_03490C_A	2068.69	1.15896	0.189902	6.10292	1.04e-09	1.18e-08	study5_a-Ketoglutarate_vs_Glu
397	C6_03730C_A	2511.71	1.10605	0.296711	3.72771	0.000193226	0.000815977	study5_a-Ketoglutarate_vs_Glu
398	C5_00510W_A	147.165	2.06975	0.307189	6.7377	1.61e-11	2.25e-10	study5_a-Ketoglutarate_vs_Glu
399	C2_04960C_A	1242.16	1.48237	0.180882	8.19524	2.5e-16	6.06e-15	study5_a-Ketoglutarate_vs_Glu
400	C2_08830W_A	2936.98	2.28542	0.275137	8.30648	9.86e-17	2.51e-15	study5_a-Ketoglutarate_vs_Glu
401	C1_02180W_A	6172.11	3.29691	0.432447	7.62385	2.46e-14	4.75e-13	study5_a-Ketoglutarate_vs_Glu
402	C2_10360C_A	2183.56	1.18098	0.268644	4.39608	1.1e-05	6.31e-05	study5_a-Ketoglutarate_vs_Glu
403	C1_11950W_A	523.653	3.18686	0.22799	13.9781	2.12e-44	2.38e-42	study5_a-Ketoglutarate_vs_Glu
404	C2_05930W_A	7039.83	1.12209	0.226068	4.96353	6.92e-07	5.07e-06	study5_a-Ketoglutarate_vs_Glu
405	C3_07830W_A	1822.32	3.42192	0.265334	12.8967	4.7e-38	4.39e-36	study5_a-Ketoglutarate_vs_Glu
406	C1_14340C_A	21046.9	3.12619	0.246408	12.6871	6.97e-37	6.22e-35	study5_a-Ketoglutarate_vs_Glu
407	C2_04760W_A	3330.11	1.2454	0.212935	5.84873	4.95e-09	5.02e-08	study5_a-Ketoglutarate_vs_Glu
408	C4_01930C_A	585.983	1.52237	0.312202	4.87624	1.08e-06	7.61e-06	study5_a-Ketoglutarate_vs_Glu
409	C7_04310C_A	2181.37	1.53166	0.27056	5.66109	1.5e-08	1.44e-07	study5_a-Ketoglutarate_vs_Glu
410	C3_07080W_A	1789.3	1.06585	0.23332	4.5682	4.92e-06	3.03e-05	study5_a-Ketoglutarate_vs_Glu
411	CR_03530W_A	12104.9	1.03679	0.154613	6.70568	2e-11	2.77e-10	study5_a-Ketoglutarate_vs_Glu
412	C3_00560C_A	1352.64	1.31599	0.318411	4.133	3.58e-05	0.000182953	study5_a-Ketoglutarate_vs_Glu
413	C3_04920C_A	4252.11	1.06412	0.259056	4.1077	4e-05	0.000201677	study5_a-Ketoglutarate_vs_Glu
414	C2_00250W_A	34525.9	1.74612	0.391678	4.45805	8.27e-06	4.85e-05	study5_a-Ketoglutarate_vs_Glu
415	C7_02220C_A	1214.37	1.84875	0.299797	6.16666	6.97e-10	8.09e-09	study5_a-Ketoglutarate_vs_Glu
416	C7_01760C_A	5104.96	2.23105	0.226265	9.86033	6.18e-23	2.51e-21	study5_a-Ketoglutarate_vs_Glu
417	C1_01490W_A	14828.9	2.49018	0.241675	10.3039	6.77e-25	3.08e-23	study5_a-Ketoglutarate_vs_Glu
418	C6_00280W_A	16172.8	1.64957	0.270527	6.09764	1.08e-09	1.22e-08	study5_a-Ketoglutarate_vs_Glu
419	C7_01030C_A	2267.49	1.11596	0.476135	2.34378	0.0190895	0.0439709	study5_a-Ketoglutarate_vs_Glu
420	C2_05840W_A	607.788	1.11371	0.327359	3.40212	0.000668664	0.00246968	study5_a-Ketoglutarate_vs_Glu
421	C6_02420W_A	921.347	1.08289	0.278467	3.88878	0.000100751	0.000458142	study5_a-Ketoglutarate_vs_Glu
422	C1_09850C_A	6105.03	1.29199	0.220844	5.85023	4.91e-09	4.99e-08	study5_a-Ketoglutarate_vs_Glu
423	C2_05180W_A	8412.07	2.28737	0.552471	4.14026	3.47e-05	0.000177998	study5_a-Ketoglutarate_vs_Glu
424	C7_03700C_A	945.207	1.31733	0.441523	2.98359	0.00284884	0.00871091	study5_a-Ketoglutarate_vs_Glu
425	CR_00290W_A	5117.58	2.68436	0.322365	8.32707	8.29e-17	2.12e-15	study5_a-Ketoglutarate_vs_Glu
426	C5_02190C_A	3625.18	1.67952	0.168272	9.98096	1.85e-23	7.79e-22	study5_a-Ketoglutarate_vs_Glu
427	C1_01530C_A	4613.3	1.01961	0.229424	4.4442	8.82e-06	5.13e-05	study5_a-Ketoglutarate_vs_Glu
428	C3_01820W_A	4307.47	1.00593	0.251701	3.99652	6.43e-05	0.000308417	study5_a-Ketoglutarate_vs_Glu
429	C7_02500C_A	1013.03	1.6962	0.249425	6.80041	1.04e-11	1.5e-10	study5_a-Ketoglutarate_vs_Glu
430	C7_03590C_A	1048.83	1.13613	0.255432	4.4479	8.67e-06	5.06e-05	study5_a-Ketoglutarate_vs_Glu
431	C1_10180C_A	3146.22	1.66468	0.291726	5.70631	1.15e-08	1.12e-07	study5_a-Ketoglutarate_vs_Glu
432	C4_03720C_A	2179.08	1.2023	0.372341	3.22903	0.0012421	0.00424632	study5_a-Ketoglutarate_vs_Glu
433	C2_01450C_A	666.877	2.49947	0.363799	6.87048	6.4e-12	9.49e-11	study5_a-Ketoglutarate_vs_Glu
434	CR_10320W_A	392.681	9.57411	1.46413	6.53911	6.19e-11	8.16e-10	study5_a-Ketoglutarate_vs_Glu
435	C1_01740W_A	1131.29	2.66722	0.470694	5.66657	1.46e-08	1.4e-07	study5_a-Ketoglutarate_vs_Glu
436	C4_06510C_A	1222.25	1.01283	0.234506	4.31898	1.57e-05	8.69e-05	study5_a-Ketoglutarate_vs_Glu
437	C1_11610C_A	2048.01	1.66249	0.347632	4.78232	1.73e-06	1.17e-05	study5_a-Ketoglutarate_vs_Glu
438	C1_13400C_A	3366.23	1.50578	0.20249	7.43632	1.04e-13	1.86e-12	study5_a-Ketoglutarate_vs_Glu
439	C6_04350C_A	5575.24	1.16458	0.169108	6.88657	5.72e-12	8.56e-11	study5_a-Ketoglutarate_vs_Glu
440	C3_02630C_A	2721.67	1.26799	0.186912	6.78391	1.17e-11	1.67e-10	study5_a-Ketoglutarate_vs_Glu
441	C7_03560W_A	12260	7.55962	0.448083	16.871	7.35e-64	1.41e-61	study5_a-Ketoglutarate_vs_Glu
442	C2_00670C_A	9.36486	2.62414	1.01614	2.58246	0.00980988	0.0249894	study5_a-Ketoglutarate_vs_Glu
443	C1_02650W_A	3853.79	1.41876	0.207109	6.85031	7.37e-12	1.09e-10	study5_a-Ketoglutarate_vs_Glu
444	CR_04790W_A	1691.22	1.84279	0.178436	10.3275	5.29e-25	2.49e-23	study5_a-Ketoglutarate_vs_Glu
445	C3_02360C_A	692.345	2.99548	0.93833	3.19236	0.00141117	0.00474526	study5_a-Ketoglutarate_vs_Glu
446	C1_13820C_A	538.74	1.41988	0.326613	4.3473	1.38e-05	7.77e-05	study5_a-Ketoglutarate_vs_Glu
447	CR_03450W_A	665.271	3.50255	0.493824	7.09271	1.32e-12	2.13e-11	study5_a-Ketoglutarate_vs_Glu
448	C5_04220W_A	23.1221	2.07963	0.732577	2.83879	0.00452856	0.0128846	study5_a-Ketoglutarate_vs_Glu
449	CR_06460W_A	377.059	2.73726	0.400222	6.83935	7.96e-12	1.17e-10	study5_a-Ketoglutarate_vs_Glu
450	C1_05880W_A	1384.92	1.21214	0.300434	4.03463	5.47e-05	0.000267026	study5_a-Ketoglutarate_vs_Glu
451	C3_04660C_A	169.339	1.45468	0.390739	3.7229	0.000196949	0.000831126	study5_a-Ketoglutarate_vs_Glu
452	CR_05750W_A	3576.93	1.22606	0.30148	4.06681	4.77e-05	0.000237034	study5_a-Ketoglutarate_vs_Glu
453	C1_05340C_A	2048.43	1.2232	0.218336	5.60238	2.11e-08	1.98e-07	study5_a-Ketoglutarate_vs_Glu
454	C6_00590W_A	2127.99	1.00449	0.283989	3.53709	0.000404567	0.00158053	study5_a-Ketoglutarate_vs_Glu
455	C6_02710C_A	43.1135	1.39981	0.419341	3.33811	0.000843493	0.00301591	study5_a-Ketoglutarate_vs_Glu
456	C4_01550C_A	2444.24	1.91374	0.476389	4.01717	5.89e-05	0.000285109	study5_a-Ketoglutarate_vs_Glu
457	C2_01950C_A	1749.15	1.00638	0.251761	3.99738	6.4e-05	0.000307599	study5_a-Ketoglutarate_vs_Glu
458	C4_05130C_A	3016.97	3.9883	0.194337	20.5226	1.35e-93	5.95e-91	study5_a-Ketoglutarate_vs_Glu
459	C6_03470W_A	1552.72	1.01106	0.204835	4.93595	7.98e-07	5.78e-06	study5_a-Ketoglutarate_vs_Glu
460	C3_03580C_A	1304.45	6.4841	0.339492	19.0994	2.55e-81	6.83e-79	study5_a-Ketoglutarate_vs_Glu
461	C1_10580C_A	616.72	3.10255	0.413201	7.50856	5.98e-14	1.11e-12	study5_a-Ketoglutarate_vs_Glu
462	C1_00700W_A	2203.11	1.63619	0.202913	8.06349	7.41e-16	1.68e-14	study5_a-Ketoglutarate_vs_Glu
463	C3_05580C_A	7049.74	3.28601	0.43071	7.62927	2.36e-14	4.59e-13	study5_a-Ketoglutarate_vs_Glu
464	C2_05990C_A	1666.45	3.71015	0.285844	12.9796	1.6e-38	1.54e-36	study5_a-Ketoglutarate_vs_Glu
465	C2_09010W_A	2597.61	1.60998	0.238885	6.73955	1.59e-11	2.22e-10	study5_a-Ketoglutarate_vs_Glu
466	C4_00270W_A	50450.7	1.38874	0.254674	5.45303	4.95e-08	4.37e-07	study5_a-Ketoglutarate_vs_Glu
467	CR_00360C_A	7537.23	3.17862	0.29754	10.683	1.22e-26	6.43e-25	study5_a-Ketoglutarate_vs_Glu
468	C2_08310W_A	1673.57	1.15317	0.290594	3.96833	7.24e-05	0.000342008	study5_a-Ketoglutarate_vs_Glu
469	C5_03250W_A	861.271	1.13919	0.301586	3.77732	0.000158528	0.000686397	study5_a-Ketoglutarate_vs_Glu
470	C1_10520W_A	345.254	1.03161	0.256487	4.02209	5.77e-05	0.000280222	study5_a-Ketoglutarate_vs_Glu
471	C5_02000C_A	14623.7	1.99352	0.209047	9.53624	1.48e-21	5.4e-20	study5_a-Ketoglutarate_vs_Glu
472	CR_08850W_A	386.034	6.21636	0.564475	11.0126	3.32e-28	2.02e-26	study5_a-Ketoglutarate_vs_Glu
473	C3_01080W_A	769.679	1.24962	0.221949	5.63021	1.8e-08	1.7e-07	study5_a-Ketoglutarate_vs_Glu
474	C1_11240C_A	3317.88	1.91319	0.266395	7.18178	6.88e-13	1.14e-11	study5_a-Ketoglutarate_vs_Glu
475	CR_08860W_A	3902.65	2.82696	0.341795	8.27094	1.33e-16	3.34e-15	study5_a-Ketoglutarate_vs_Glu
476	CR_06120W_A	2073.21	2.05949	0.335401	6.14039	8.23e-10	9.44e-09	study5_a-Ketoglutarate_vs_Glu
477	CR_08780W_A	2273.18	1.0654	0.451873	2.35774	0.0183864	0.0426225	study5_a-Ketoglutarate_vs_Glu
478	C7_02150C_A	1341.56	1.00049	0.295515	3.38558	0.000710271	0.00259379	study5_a-Ketoglutarate_vs_Glu
479	CR_06650C_A	1031.68	3.56287	0.283126	12.584	2.58e-36	2.15e-34	study5_a-Ketoglutarate_vs_Glu
480	C1_12140W_A	1715.27	1.39052	0.329551	4.21943	2.45e-05	0.000129999	study5_a-Ketoglutarate_vs_Glu
481	C2_10270W_A	1293.99	1.1451	0.360571	3.1758	0.00149421	0.00499993	study5_a-Ketoglutarate_vs_Glu
482	C5_03810C_A	813.918	1.34385	0.491342	2.73507	0.00623679	0.0169611	study5_a-Ketoglutarate_vs_Glu
483	C7_00090C_A	1287.95	1.69741	0.230232	7.37259	1.67e-13	2.94e-12	study5_a-Ketoglutarate_vs_Glu
484	C5_02340C_A	2531.67	1.12623	0.173648	6.48573	8.83e-11	1.15e-09	study5_a-Ketoglutarate_vs_Glu
485	C4_02190C_A	144.355	2.87326	0.389481	7.37716	1.62e-13	2.84e-12	study5_a-Ketoglutarate_vs_Glu
486	C7_02370W_A	1563.53	1.19927	0.309284	3.87756	0.000105508	0.000476605	study5_a-Ketoglutarate_vs_Glu
487	C6_01650C_A	4746.24	1.59271	0.24694	6.44977	1.12e-10	1.44e-09	study5_a-Ketoglutarate_vs_Glu
488	C4_02740W_A	8549.4	1.72572	0.520359	3.31641	0.00091181	0.0032283	study5_a-Ketoglutarate_vs_Glu
489	C3_01480C_A	1772.07	2.26351	0.257693	8.78376	1.58e-18	4.68e-17	study5_a-Ketoglutarate_vs_Glu
490	C4_03430W_A	1799.97	1.60052	0.354958	4.50904	6.51e-06	3.93e-05	study5_a-Ketoglutarate_vs_Glu
491	C2_03310C_A	1522.48	1.44867	0.252741	5.73185	9.93e-09	9.72e-08	study5_a-Ketoglutarate_vs_Glu
492	C2_09880C_A	3968.23	3.3603	0.550956	6.09904	1.07e-09	1.21e-08	study5_a-Ketoglutarate_vs_Glu
493	C3_07120W_A	874.191	1.41729	0.256792	5.51919	3.41e-08	3.08e-07	study5_a-Ketoglutarate_vs_Glu
494	C1_02170C_A	2412.62	1.76141	0.330041	5.33694	9.45e-08	8.02e-07	study5_a-Ketoglutarate_vs_Glu
495	C3_07590W_A	734.111	1.0341	0.263688	3.9217	8.79e-05	0.00040548	study5_a-Ketoglutarate_vs_Glu
496	C1_04950C_A	3470.58	1.45811	0.257688	5.65845	1.53e-08	1.46e-07	study5_a-Ketoglutarate_vs_Glu
497	CR_07700W_A	1220.68	1.20205	0.271581	4.42611	9.59e-06	5.56e-05	study5_a-Ketoglutarate_vs_Glu
498	C3_03720W_A	4523.81	1.17013	0.21017	5.56752	2.58e-08	2.39e-07	study5_a-Ketoglutarate_vs_Glu
499	C3_07640C_A	7642.49	2.52258	0.261951	9.63	5.97e-22	2.27e-20	study5_a-Ketoglutarate_vs_Glu
500	C5_01130W_A	749.342	1.0051	0.362868	2.76989	0.00560758	0.0154686	study5_a-Ketoglutarate_vs_Glu
501	C1_10190W_A	1376.09	1.03162	0.145596	7.08551	1.39e-12	2.22e-11	study5_a-Ketoglutarate_vs_Glu
502	C2_06690C_A	1880.06	1.79218	0.3457	5.1842	2.17e-07	1.74e-06	study5_a-Ketoglutarate_vs_Glu
503	C1_05200C_A	1519.26	1.42677	0.276319	5.16347	2.42e-07	1.92e-06	study5_a-Ketoglutarate_vs_Glu
504	C1_08930C_A	1323.97	1.97918	0.179867	11.0036	3.67e-28	2.19e-26	study5_a-Ketoglutarate_vs_Glu
505	C1_00900W_A	1703.13	1.59702	0.32442	4.92269	8.54e-07	6.15e-06	study5_a-Ketoglutarate_vs_Glu
506	C1_13190W_A	5543.52	1.13705	0.386043	2.94539	0.00322552	0.00968284	study5_a-Ketoglutarate_vs_Glu
507	C1_06860W_A	146.655	3.00609	0.511029	5.88242	4.04e-09	4.19e-08	study5_a-Ketoglutarate_vs_Glu
508	CR_09460C_A	5888.77	2.48687	0.24984	9.95388	2.43e-23	1.01e-21	study5_a-Ketoglutarate_vs_Glu
509	C6_04200C_A	1193.98	2.32089	0.359087	6.46331	1.02e-10	1.32e-09	study5_a-Ketoglutarate_vs_Glu
510	C5_02550C_A	1699.31	1.19336	0.332004	3.59441	0.000325123	0.0013007	study5_a-Ketoglutarate_vs_Glu
511	C1_11670W_A	13320.8	1.44192	0.37622	3.83265	0.000126769	0.00056559	study5_a-Ketoglutarate_vs_Glu
512	C6_00480C_A	3983.71	5.60254	0.460862	12.1567	5.29e-34	4.08e-32	study5_a-Ketoglutarate_vs_Glu
513	C1_13910C_A	1558.91	1.44206	0.243991	5.91028	3.42e-09	3.61e-08	study5_a-Ketoglutarate_vs_Glu
514	C5_00430W_A	3926.04	2.24996	0.403475	5.57647	2.45e-08	2.27e-07	study5_a-Ketoglutarate_vs_Glu
515	C4_01160W_A	715.692	4.22643	0.459382	9.20026	3.57e-20	1.21e-18	study5_a-Ketoglutarate_vs_Glu
516	C1_04500W_A	11218.9	4.23213	0.469635	9.01152	2.03e-19	6.59e-18	study5_a-Ketoglutarate_vs_Glu
517	C2_01590W_A	15689.5	1.03161	0.233891	4.41064	1.03e-05	5.92e-05	study5_a-Ketoglutarate_vs_Glu
518	CR_06140W_A	4738.38	1.05903	0.20822	5.08612	3.65e-07	2.82e-06	study5_a-Ketoglutarate_vs_Glu
519	C2_00760C_A	3193.19	1.96065	0.385315	5.08844	3.61e-07	2.79e-06	study5_a-Ketoglutarate_vs_Glu
520	C6_01250W_A	263.735	1.01124	0.340426	2.9705	0.00297311	0.00901323	study5_a-Ketoglutarate_vs_Glu
521	C4_01860C_A	808.897	1.44347	0.274562	5.25737	1.46e-07	1.21e-06	study5_a-Ketoglutarate_vs_Glu
522	CR_01640C_A	239.144	1.59042	0.558057	2.84993	0.00437291	0.012517	study5_a-Ketoglutarate_vs_Glu
523	C1_10740C_A	4888.43	1.23566	0.479511	2.57691	0.00996881	0.0253314	study5_a-Ketoglutarate_vs_Glu
524	C2_05750W_A	1380.35	2.04972	0.380311	5.3896	7.06e-08	6.07e-07	study5_a-Ketoglutarate_vs_Glu
525	C1_07890C_A	7627.84	1.36815	0.405466	3.37427	0.000740111	0.00269318	study5_a-Ketoglutarate_vs_Glu
526	C7_02040C_A	24426.4	2.80777	0.220011	12.7619	2.67e-37	2.46e-35	study5_a-Ketoglutarate_vs_Glu
527	C2_03320W_A	2501.71	1.09054	0.443509	2.45889	0.0139369	0.0336903	study5_a-Ketoglutarate_vs_Glu
528	C1_14220C_A	676.349	2.96797	0.272898	10.8757	1.5e-27	8.74e-26	study5_a-Ketoglutarate_vs_Glu
529	C1_02320C_A	5595.94	1.93112	0.248585	7.76846	7.94e-15	1.6e-13	study5_a-Ketoglutarate_vs_Glu
530	C5_04280C_A	3879.26	1.24705	0.227099	5.49119	3.99e-08	3.57e-07	study5_a-Ketoglutarate_vs_Glu
531	C4_03320W_A	1672.49	1.29457	0.207705	6.23272	4.58e-10	5.47e-09	study5_a-Ketoglutarate_vs_Glu
532	C1_11850W_A	5555.06	2.35074	0.306586	7.66748	1.75e-14	3.47e-13	study5_a-Ketoglutarate_vs_Glu
533	CR_09180W_A	1174.45	1.21575	0.306045	3.97246	7.11e-05	0.000336903	study5_a-Ketoglutarate_vs_Glu
534	C1_13370W_A	797.492	1.03382	0.319525	3.2355	0.0012143	0.00416527	study5_a-Ketoglutarate_vs_Glu
535	C6_04160C_A	1977.41	1.49577	0.482224	3.10182	0.00192334	0.00622367	study5_a-Ketoglutarate_vs_Glu
536	C3_01970C_A	33.2874	1.96813	0.575239	3.42142	0.000622959	0.00232036	study5_a-Ketoglutarate_vs_Glu
537	C1_10160W_A	5958.32	2.10809	0.30831	6.83756	8.06e-12	1.18e-10	study5_a-Ketoglutarate_vs_Glu
538	C2_05570C_A	1424.78	1.12247	0.218883	5.12819	2.93e-07	2.29e-06	study5_a-Ketoglutarate_vs_Glu
539	C1_01840C_A	1881.9	1.91008	0.334983	5.70203	1.18e-08	1.15e-07	study5_a-Ketoglutarate_vs_Glu
540	CR_09070C_A	6711	1.66667	0.225653	7.38596	1.51e-13	2.69e-12	study5_a-Ketoglutarate_vs_Glu
541	C4_02390W_A	49372.5	1.23448	0.282432	4.37089	1.24e-05	7.03e-05	study5_a-Ketoglutarate_vs_Glu
542	C5_04440C_A	2788.5	3.84151	0.305718	12.5655	3.27e-36	2.68e-34	study5_a-Ketoglutarate_vs_Glu
543	C1_09690W_A	18480	2.10403	0.292584	7.1912	6.42e-13	1.07e-11	study5_a-Ketoglutarate_vs_Glu
544	C4_04050C_A	4358.97	2.29247	0.406361	5.64147	1.69e-08	1.6e-07	study5_a-Ketoglutarate_vs_Glu
545	C3_07730W_A	2347.7	1.31877	0.287634	4.58488	4.54e-06	2.81e-05	study5_a-Ketoglutarate_vs_Glu
546	C1_04330W_A	9714.7	1.04709	0.35844	2.92123	0.00348648	0.0103452	study5_a-Ketoglutarate_vs_Glu
547	C2_08180C_A	1577.51	1.21115	0.375328	3.2269	0.00125139	0.0042686	study5_a-Ketoglutarate_vs_Glu
548	C6_02670C_A	3166.48	1.26993	0.267544	4.74663	2.07e-06	1.38e-05	study5_a-Ketoglutarate_vs_Glu
549	C2_09800C_A	222.746	5.17204	0.659754	7.83935	4.53e-15	9.36e-14	study5_a-Ketoglutarate_vs_Glu
550	CR_07250C_A	1310.94	1.89371	0.201305	9.40718	5.1e-21	1.77e-19	study5_a-Ketoglutarate_vs_Glu
551	C1_01690C_A	16018.5	1.1756	0.313429	3.75079	0.00017628	0.000754193	study5_a-Ketoglutarate_vs_Glu
552	C2_09240C_A	485.358	1.52214	0.203003	7.49812	6.47e-14	1.19e-12	study5_a-Ketoglutarate_vs_Glu
553	C1_02070W_A	433.9	5.71132	0.474978	12.0244	2.65e-33	1.96e-31	study5_a-Ketoglutarate_vs_Glu
554	CR_04150W_A	243.449	1.5253	0.29322	5.2019	1.97e-07	1.59e-06	study5_a-Ketoglutarate_vs_Glu
555	C1_13610C_A	3099.57	1.26984	0.259042	4.90208	9.48e-07	6.76e-06	study5_a-Ketoglutarate_vs_Glu
556	C1_01450W_A	3993.06	2.24066	0.23121	9.69101	3.29e-22	1.27e-20	study5_a-Ketoglutarate_vs_Glu
557	C5_05080W_A	1653.09	1.28321	0.250638	5.11975	3.06e-07	2.39e-06	study5_a-Ketoglutarate_vs_Glu
558	C6_02200C_A	792.957	1.36066	0.210257	6.47143	9.71e-11	1.26e-09	study5_a-Ketoglutarate_vs_Glu
559	C2_01150W_A	2153.99	1.18494	0.180198	6.57577	4.84e-11	6.44e-10	study5_a-Ketoglutarate_vs_Glu
560	C7_03230C_A	172.95	1.42841	0.293229	4.87129	1.11e-06	7.78e-06	study5_a-Ketoglutarate_vs_Glu
561	C2_03640W_A	1434.39	1.53841	0.186341	8.25586	1.51e-16	3.73e-15	study5_a-Ketoglutarate_vs_Glu
562	C3_03700C_A	30.2272	1.79533	0.685598	2.61864	0.00882816	0.0228095	study5_a-Ketoglutarate_vs_Glu
563	C1_12260W_A	641.175	1.09788	0.27297	4.02198	5.77e-05	0.000280222	study5_a-Ketoglutarate_vs_Glu
564	C7_03850W_A	1318.61	1.66218	0.531028	3.13013	0.00174731	0.00572245	study5_a-Ketoglutarate_vs_Glu
565	C6_02320C_A	1644.66	1.61502	0.266333	6.06391	1.33e-09	1.49e-08	study5_a-Ketoglutarate_vs_Glu
566	C3_01900C_A	1606.5	1.57939	0.343937	4.5921	4.39e-06	2.73e-05	study5_a-Ketoglutarate_vs_Glu
567	CR_00200W_A	99391.4	9.05556	0.357316	25.3433	1.07e-141	9.38e-139	study5_a-Ketoglutarate_vs_Glu
568	C1_13350W_A	15379.7	2.07931	0.201749	10.3064	6.59e-25	3.03e-23	study5_a-Ketoglutarate_vs_Glu
569	C1_04010C_A	621.939	2.41146	0.282949	8.5226	1.56e-17	4.21e-16	study5_a-Ketoglutarate_vs_Glu
570	C7_03630C_A	804.213	1.01244	0.297569	3.40239	0.000667996	0.0024687	study5_a-Ketoglutarate_vs_Glu
571	C1_02840W_A	2640.26	1.09641	0.275257	3.98321	6.8e-05	0.000323766	study5_a-Ketoglutarate_vs_Glu
572	C1_09210C_A	6559.41	1.89117	0.18374	10.2926	7.61e-25	3.42e-23	study5_a-Ketoglutarate_vs_Glu
573	C2_08260W_A	1204.09	8.44798	0.690754	12.2301	2.15e-34	1.69e-32	study5_a-Ketoglutarate_vs_Glu
574	C3_03190C_A	1014.06	1.01312	0.302946	3.34421	0.000825162	0.00295895	study5_a-Ketoglutarate_vs_Glu
575	C2_04790C_A	1318.71	1.0003	0.276195	3.62172	0.00029265	0.00118542	study5_a-Ketoglutarate_vs_Glu
576	C6_03230W_A	2518.9	2.74841	0.434333	6.32787	2.49e-10	3.07e-09	study5_a-Ketoglutarate_vs_Glu
577	C6_03700W_A	3789.57	2.91822	0.557793	5.23173	1.68e-07	1.38e-06	study5_a-Ketoglutarate_vs_Glu
578	C1_10570C_A	33.8576	2.16692	0.526032	4.11937	3.8e-05	0.000192674	study5_a-Ketoglutarate_vs_Glu
579	CR_05570C_A	436.306	1.2979	0.306965	4.22819	2.36e-05	0.000125365	study5_a-Ketoglutarate_vs_Glu
580	C4_01450W_A	2582.11	1.26687	0.33365	3.797	0.000146456	0.000639686	study5_a-Ketoglutarate_vs_Glu
581	CR_05480W_A	7416.16	2.27499	0.162077	14.0365	9.32e-45	1.08e-42	study5_a-Ketoglutarate_vs_Glu
582	C5_04380C_A	61.4615	3.01134	0.663453	4.53888	5.66e-06	3.45e-05	study5_a-Ketoglutarate_vs_Glu
583	C6_02150C_A	721.495	1.44417	0.268676	5.37512	7.65e-08	6.56e-07	study5_a-Ketoglutarate_vs_Glu
584	C4_04840C_A	542.535	2.56017	0.468113	5.46913	4.52e-08	4.02e-07	study5_a-Ketoglutarate_vs_Glu
585	CR_07810W_A	1019.49	3.12234	0.362836	8.60536	7.61e-18	2.1e-16	study5_a-Ketoglutarate_vs_Glu
586	C4_04330C_A	4340.67	1.50832	0.262823	5.7389	9.53e-09	9.36e-08	study5_a-Ketoglutarate_vs_Glu
587	C3_06580W_A	9208.26	7.94994	0.376898	21.0931	9.2e-99	4.36e-96	study5_a-Ketoglutarate_vs_Glu
588	CR_01160W_A	26.518	2.05885	0.575611	3.5768	0.000347826	0.00138165	study5_a-Ketoglutarate_vs_Glu
589	C1_01240W_A	1861.76	3.37306	0.245463	13.7416	5.72e-43	6.28e-41	study5_a-Ketoglutarate_vs_Glu
590	C6_00600C_A	6288.61	3.37547	0.255328	13.2202	6.71e-40	7.13e-38	study5_a-Ketoglutarate_vs_Glu
591	CR_05170C_A	9285.34	5.29108	0.221144	23.926	1.64e-126	1.12e-123	study5_a-Ketoglutarate_vs_Glu
592	C1_04060W_A	366.698	1.38031	0.259429	5.32058	1.03e-07	8.71e-07	study5_a-Ketoglutarate_vs_Glu
593	CR_01370C_A	2122.25	1.04281	0.287554	3.62647	0.000287323	0.00116846	study5_a-Ketoglutarate_vs_Glu
594	CR_01320C_A	2401.69	1.0885	0.243679	4.46692	7.94e-06	4.68e-05	study5_a-Ketoglutarate_vs_Glu
595	C5_01360W_A	138.063	2.17433	0.533119	4.07851	4.53e-05	0.000226705	study5_a-Ketoglutarate_vs_Glu
596	C5_00590W_A	28138.7	2.38273	0.271914	8.76279	1.9e-18	5.61e-17	study5_a-Ketoglutarate_vs_Glu
597	C1_13440C_A	70.3954	3.60334	0.595399	6.05198	1.43e-09	1.59e-08	study5_a-Ketoglutarate_vs_Glu
598	C2_02230C_A	3866.09	8.22502	0.446721	18.412	1.05e-75	2.7e-73	study5_a-Ketoglutarate_vs_Glu
599	C6_04330W_A	996.005	1.27681	0.383927	3.32566	0.00088209	0.00313389	study5_a-Ketoglutarate_vs_Glu
600	C4_05110C_A	6308.83	2.44104	0.288083	8.47341	2.38e-17	6.38e-16	study5_a-Ketoglutarate_vs_Glu
601	C1_02110C_A	12935.7	3.33084	0.412868	8.06755	7.17e-16	1.63e-14	study5_a-Ketoglutarate_vs_Glu
602	C3_01130C_A	6480.78	2.97551	0.373944	7.9571	1.76e-15	3.82e-14	study5_a-Ketoglutarate_vs_Glu
603	C2_07540W_A	2474.23	1.42804	0.228017	6.26286	3.78e-10	4.55e-09	study5_a-Ketoglutarate_vs_Glu
604	C4_00330C_A	4152.88	1.47612	0.203954	7.2375	4.57e-13	7.77e-12	study5_a-Ketoglutarate_vs_Glu
605	C1_07660W_A	265.102	1.85128	0.363339	5.09519	3.48e-07	2.7e-06	study5_a-Ketoglutarate_vs_Glu
606	C4_06210C_A	2753.46	1.03377	0.369821	2.79532	0.00518482	0.0144382	study5_a-Ketoglutarate_vs_Glu
607	C1_06350W_A	2582.04	2.6685	0.263119	10.1418	3.6e-24	1.58e-22	study5_a-Ketoglutarate_vs_Glu
608	C3_00880W_A	15322.7	2.91199	0.268286	10.854	1.91e-27	1.09e-25	study5_a-Ketoglutarate_vs_Glu
609	C2_09070C_A	6301.94	2.76695	0.258306	10.7119	8.95e-27	4.88e-25	study5_a-Ketoglutarate_vs_Glu
610	C1_09120W_A	1282	2.53735	0.244507	10.3774	3.14e-25	1.5e-23	study5_a-Ketoglutarate_vs_Glu
611	C4_03540C_A	1327.16	1.24885	0.252402	4.94787	7.5e-07	5.47e-06	study5_a-Ketoglutarate_vs_Glu
612	C5_04210C_A	12.9239	3.55564	1.09126	3.25827	0.00112093	0.0038882	study5_a-Ketoglutarate_vs_Glu
613	C1_11690W_A	2703.06	1.0527	0.289085	3.64149	0.00027106	0.00110965	study5_a-Ketoglutarate_vs_Glu
614	C2_04590C_A	5639.86	1.49327	0.224918	6.63919	3.15e-11	4.29e-10	study5_a-Ketoglutarate_vs_Glu
615	C2_02060C_A	590.084	1.53522	0.3313	4.63394	3.59e-06	2.28e-05	study5_a-Ketoglutarate_vs_Glu
616	C2_08910C_A	1931.36	1.03758	0.146667	7.07435	1.5e-12	2.4e-11	study5_a-Ketoglutarate_vs_Glu
617	CR_08310C_A	359.718	4.7914	1.2429	3.85501	0.000115723	0.000519698	study5_a-Ketoglutarate_vs_Glu
618	C4_02890C_A	4895.89	1.53201	0.170178	9.00237	2.21e-19	7.11e-18	study5_a-Ketoglutarate_vs_Glu
619	CR_03250C_A	6187.41	2.07374	0.298805	6.94011	3.92e-12	6.03e-11	study5_a-Ketoglutarate_vs_Glu
620	C1_06050C_A	1096.9	1.79171	0.242815	7.37891	1.6e-13	2.82e-12	study5_a-Ketoglutarate_vs_Glu
621	C4_00080C_A	1855.96	1.23803	0.243887	5.07624	3.85e-07	2.95e-06	study5_a-Ketoglutarate_vs_Glu
622	C2_06170C_A	12436.9	2.37376	0.314003	7.55967	4.04e-14	7.59e-13	study5_a-Ketoglutarate_vs_Glu
623	CR_07790C_A	24964	2.20864	0.392843	5.62221	1.89e-08	1.77e-07	study5_a-Ketoglutarate_vs_Glu
624	C2_03290W_A	1507.04	1.49103	0.191184	7.79895	6.24e-15	1.28e-13	study5_a-Ketoglutarate_vs_Glu
625	C1_08750W_A	1063.57	1.06966	0.441151	2.42471	0.0153206	0.0365051	study5_a-Ketoglutarate_vs_Glu
626	C1_13060C_A	3550.61	1.0811	0.27828	3.88493	0.000102361	0.00046341	study5_a-Ketoglutarate_vs_Glu
627	C1_00410C_A	3131.92	1.79362	0.226064	7.93412	2.12e-15	4.55e-14	study5_a-Ketoglutarate_vs_Glu
628	C3_01430W_A	540.318	1.0165	0.436797	2.32717	0.0199562	0.0455582	study5_a-Ketoglutarate_vs_Glu
629	C2_04290W_A	353.977	1.93855	0.249479	7.77041	7.82e-15	1.59e-13	study5_a-Ketoglutarate_vs_Glu
630	C2_01200C_A	13808.5	1.39226	0.24928	5.58511	2.34e-08	2.17e-07	study5_a-Ketoglutarate_vs_Glu
631	C1_07640C_A	1384.15	1.2247	0.340794	3.59367	0.000326052	0.00130357	study5_a-Ketoglutarate_vs_Glu
632	C1_10240C_A	899.413	2.55189	0.304644	8.37663	5.45e-17	1.42e-15	study5_a-Ketoglutarate_vs_Glu
633	C3_06040W_A	66.9001	1.00502	0.428501	2.34543	0.0190052	0.0438258	study5_a-Ketoglutarate_vs_Glu
634	C5_01790C_A	91.6554	1.01581	0.380061	2.67275	0.00752329	0.019923	study5_a-Ketoglutarate_vs_Glu
635	CR_07370W_A	1708.98	1.39102	0.162358	8.56763	1.06e-17	2.89e-16	study5_a-Ketoglutarate_vs_Glu
636	C5_04940W_A	244.102	1.04114	0.424798	2.4509	0.0142501	0.0343721	study5_a-Ketoglutarate_vs_Glu
637	C1_08230C_A	2766.99	1.59864	0.236535	6.75857	1.39e-11	1.96e-10	study5_a-Ketoglutarate_vs_Glu
638	C7_03310W_A	4222.78	5.76019	0.557888	10.325	5.43e-25	2.53e-23	study5_a-Ketoglutarate_vs_Glu
639	C2_08870C_A	6027.56	1.43893	0.403109	3.56957	0.000357571	0.00141489	study5_a-Ketoglutarate_vs_Glu
640	C7_01910C_A	733.829	1.67571	0.285434	5.87077	4.34e-09	4.47e-08	study5_a-Ketoglutarate_vs_Glu
641	C3_02480C_A	18462.8	1.32406	0.296344	4.46799	7.9e-06	4.66e-05	study5_a-Ketoglutarate_vs_Glu
642	C3_02640C_A	3575.54	1.69593	0.229172	7.40025	1.36e-13	2.42e-12	study5_a-Ketoglutarate_vs_Glu
643	C2_03350W_A	1679.35	7.16769	0.423299	16.9329	2.57e-64	5.11e-62	study5_a-Ketoglutarate_vs_Glu
644	C7_03480W_A	3715.22	1.34312	0.290227	4.62784	3.7e-06	2.35e-05	study5_a-Ketoglutarate_vs_Glu
645	C1_09780C_A	2110.77	1.46302	0.195982	7.46507	8.33e-14	1.52e-12	study5_a-Ketoglutarate_vs_Glu
646	C7_03780C_A	1209.35	1.49529	0.24045	6.21869	5.01e-10	5.91e-09	study5_a-Ketoglutarate_vs_Glu
647	C1_08050W_A	4367.21	1.45576	0.231318	6.29335	3.11e-10	3.8e-09	study5_a-Ketoglutarate_vs_Glu
648	CR_07130C_A	544.323	3.05601	0.412735	7.40429	1.32e-13	2.35e-12	study5_a-Ketoglutarate_vs_Glu
649	C2_09750W_A	9115.31	1.62421	0.273222	5.94467	2.77e-09	2.96e-08	study5_a-Ketoglutarate_vs_Glu
650	C2_10180W_A	241.11	2.72213	0.335256	8.11956	4.68e-16	1.08e-14	study5_a-Ketoglutarate_vs_Glu
651	C5_03980W_A	2127.82	1.53671	0.16223	9.47243	2.73e-21	9.73e-20	study5_a-Ketoglutarate_vs_Glu
652	C1_00390W_A	7743.07	3.02231	0.360587	8.38163	5.22e-17	1.37e-15	study5_a-Ketoglutarate_vs_Glu
653	C6_02690C_A	1421.16	1.07525	0.260674	4.12488	3.71e-05	0.000188743	study5_a-Ketoglutarate_vs_Glu
654	C6_02740W_A	2979.3	1.86775	0.209347	8.92179	4.59e-19	1.43e-17	study5_a-Ketoglutarate_vs_Glu
655	C3_01610W_A	10012.7	1.94763	0.225386	8.64131	5.56e-18	1.58e-16	study5_a-Ketoglutarate_vs_Glu
656	CR_10160W_A	17754.8	1.73416	0.216148	8.02301	1.03e-15	2.29e-14	study5_a-Ketoglutarate_vs_Glu
657	C6_00150W_A	17169.9	2.05215	0.311826	6.58106	4.67e-11	6.24e-10	study5_a-Ketoglutarate_vs_Glu
658	C5_03960W_A	3217.3	1.00368	0.203511	4.93182	8.15e-07	5.9e-06	study5_a-Ketoglutarate_vs_Glu
659	CR_09550C_A	2413.24	2.11717	0.198341	10.6744	1.34e-26	7e-25	study5_a-Ketoglutarate_vs_Glu
660	CR_08800W_A	1552.17	1.51493	0.27591	5.49068	4e-08	3.57e-07	study5_a-Ketoglutarate_vs_Glu
661	C2_08120W_A	4077.47	1.18137	0.274887	4.29766	1.73e-05	9.46e-05	study5_a-Ketoglutarate_vs_Glu
662	C4_06780C_A	1509.53	2.23508	0.286636	7.79762	6.31e-15	1.29e-13	study5_a-Ketoglutarate_vs_Glu
663	C4_02620C_A	10108.4	1.04761	0.254727	4.11268	3.91e-05	0.00019786	study5_a-Ketoglutarate_vs_Glu
664	CR_08160W_A	2777.89	1.43108	0.235103	6.08701	1.15e-09	1.3e-08	study5_a-Ketoglutarate_vs_Glu
665	C4_04000W_A	2669.19	1.29484	0.354756	3.64995	0.000262291	0.0010795	study5_a-Ketoglutarate_vs_Glu
666	C1_03950C_A	154.064	1.17719	0.368125	3.1978	0.00138481	0.00466683	study5_a-Ketoglutarate_vs_Glu
667	C3_01410C_A	2679.89	2.17438	0.264481	8.22129	2.01e-16	4.92e-15	study5_a-Ketoglutarate_vs_Glu
668	C4_03890W_A	7664.9	1.99515	0.330947	6.0286	1.65e-09	1.82e-08	study5_a-Ketoglutarate_vs_Glu
669	C6_01500C_A	3828.28	6.09101	0.375418	16.2246	3.38e-59	5.62e-57	study5_a-Ketoglutarate_vs_Glu
670	C1_07220W_A	13102.1	5.32634	0.410866	12.9637	1.97e-38	1.86e-36	study5_a-Ketoglutarate_vs_Glu
671	C3_04070C_A	7749.06	3.50106	0.315048	11.1128	1.09e-28	7.04e-27	study5_a-Ketoglutarate_vs_Glu
672	C6_03240W_A	752.199	2.15341	0.333119	6.4644	1.02e-10	1.32e-09	study5_a-Ketoglutarate_vs_Glu
673	C1_03400W_A	2263.83	1.34433	0.262748	5.11643	3.11e-07	2.43e-06	study5_a-Ketoglutarate_vs_Glu
674	C5_04690C_A	174.913	2.92855	0.412603	7.09773	1.27e-12	2.06e-11	study5_a-Ketoglutarate_vs_Glu
675	C2_00930C_A	1320.37	1.46182	0.21596	6.76896	1.3e-11	1.84e-10	study5_a-Ketoglutarate_vs_Glu
676	C2_08820C_A	74.588	2.70366	0.49035	5.51372	3.51e-08	3.17e-07	study5_a-Ketoglutarate_vs_Glu
677	C2_09220W_A	8729.9	1.04784	0.376658	2.78195	0.00540336	0.0149723	study5_a-Ketoglutarate_vs_Glu
678	C1_03320C_A	2961.65	1.2502	0.290244	4.30743	1.65e-05	9.09e-05	study5_a-Ketoglutarate_vs_Glu
679	C1_01780C_A	1437.49	1.12418	0.295855	3.79977	0.00014483	0.000634677	study5_a-Ketoglutarate_vs_Glu
680	C2_04970W_A	700.632	1.17648	0.361402	3.25531	0.00113269	0.00392237	study5_a-Ketoglutarate_vs_Glu
681	C1_06690W_A	553.805	1.28592	0.245846	5.2306	1.69e-07	1.38e-06	study5_a-Ketoglutarate_vs_Glu
682	C7_02230W_A	163.863	3.6918	0.427874	8.62824	6.23e-18	1.76e-16	study5_a-Ketoglutarate_vs_Glu
683	C3_07310C_A	29029.3	1.27132	0.213996	5.94088	2.83e-09	3.01e-08	study5_a-Ketoglutarate_vs_Glu
684	C2_00610C_A	2820.6	1.55362	0.175399	8.85763	8.17e-19	2.5e-17	study5_a-Ketoglutarate_vs_Glu
685	C1_00450C_A	2814.36	1.04722	0.185286	5.65188	1.59e-08	1.51e-07	study5_a-Ketoglutarate_vs_Glu
686	C2_05500W_A	16022.9	1.22772	0.183262	6.69926	2.09e-11	2.89e-10	study5_a-Ketoglutarate_vs_Glu
687	C2_00240C_A	1053.74	1.16755	0.406495	2.87224	0.00407576	0.0117865	study5_a-Ketoglutarate_vs_Glu
688	C3_01140W_A	871.983	1.05999	0.198835	5.331	9.77e-08	8.26e-07	study5_a-Ketoglutarate_vs_Glu
689	C2_04620W_A	8173.53	1.01953	0.14416	7.07223	1.52e-12	2.43e-11	study5_a-Ketoglutarate_vs_Glu
690	C7_02420C_A	601.425	1.21343	0.171168	7.0891	1.35e-12	2.18e-11	study5_a-Ketoglutarate_vs_Glu
691	C1_12470W_A	165.262	1.1387	0.376406	3.02519	0.00248477	0.00773835	study5_a-Ketoglutarate_vs_Glu
692	C1_07880C_A	4107.68	1.86727	0.294351	6.34369	2.24e-10	2.79e-09	study5_a-Ketoglutarate_vs_Glu
693	C3_07200C_A	1238.16	1.79325	0.219314	8.17662	2.92e-16	6.99e-15	study5_a-Ketoglutarate_vs_Glu
694	C6_04050W_A	187.843	1.04594	0.263713	3.96621	7.3e-05	0.000344789	study5_a-Ketoglutarate_vs_Glu
695	C5_02080C_A	963.482	1.72562	0.348468	4.95201	7.34e-07	5.37e-06	study5_a-Ketoglutarate_vs_Glu
696	C4_02210W_A	123.489	2.1063	0.467629	4.50422	6.66e-06	4e-05	study5_a-Ketoglutarate_vs_Glu
697	C2_08170W_A	334.631	1.48297	0.351502	4.21895	2.45e-05	0.000130136	study5_a-Ketoglutarate_vs_Glu
698	C1_07380C_A	1342.03	1.18104	0.192304	6.14156	8.17e-10	9.39e-09	study5_a-Ketoglutarate_vs_Glu
699	C6_04310W_A	2280.97	2.64766	0.229374	11.543	8.01e-31	5.54e-29	study5_a-Ketoglutarate_vs_Glu
700	C6_03210C_A	382.411	1.20105	0.255395	4.70273	2.57e-06	1.67e-05	study5_a-Ketoglutarate_vs_Glu
701	C3_06100C_A	3570.63	1.04344	0.201068	5.18948	2.11e-07	1.69e-06	study5_a-Ketoglutarate_vs_Glu
702	C3_02790W_A	383.31	3.65223	0.405712	9.00202	2.22e-19	7.11e-18	study5_a-Ketoglutarate_vs_Glu
703	C1_12580W_A	1599.4	1.15077	0.202946	5.67032	1.43e-08	1.37e-07	study5_a-Ketoglutarate_vs_Glu
704	C1_06550W_A	9070.68	1.46347	0.382584	3.82521	0.000130658	0.000580213	study5_a-Ketoglutarate_vs_Glu
705	C1_07170C_A	1628.92	2.33833	0.243557	9.60078	7.93e-22	2.94e-20	study5_a-Ketoglutarate_vs_Glu
706	C2_04280W_A	1160.53	3.52512	0.233074	15.1245	1.12e-51	1.46e-49	study5_a-Ketoglutarate_vs_Glu
707	C4_03190W_A	1915.47	1.44585	0.242913	5.95211	2.65e-09	2.83e-08	study5_a-Ketoglutarate_vs_Glu
708	C3_00220W_A	3277.23	2.64203	0.388018	6.80905	9.82e-12	1.42e-10	study5_a-Ketoglutarate_vs_Glu
709	C2_08920W_A	2975.43	2.10908	0.297139	7.09798	1.27e-12	2.06e-11	study5_a-Ketoglutarate_vs_Glu
710	C1_09240C_A	592.055	2.19051	0.433995	5.04731	4.48e-07	3.39e-06	study5_a-Ketoglutarate_vs_Glu
711	C6_01670W_A	7669.52	1.58359	0.387883	4.08264	4.45e-05	0.000223247	study5_a-Ketoglutarate_vs_Glu
712	CR_05660W_A	2223.75	1.25369	0.440697	2.84478	0.00444415	0.0126855	study5_a-Ketoglutarate_vs_Glu
713	C3_05160C_A	2064.96	1.36317	0.400594	3.40287	0.00066681	0.00246728	study5_a-Ketoglutarate_vs_Glu
714	C1_13630W_A	4880.58	1.8214	0.303259	6.00611	1.9e-09	2.07e-08	study5_a-Ketoglutarate_vs_Glu
715	C1_11310C_A	6802.42	1.90251	0.181524	10.4808	1.06e-25	5.26e-24	study5_a-Ketoglutarate_vs_Glu
716	C2_04470W_A	190.873	1.4149	0.350467	4.0372	5.41e-05	0.000264749	study5_a-Ketoglutarate_vs_Glu
717	C7_03490W_A	3799.68	1.29019	0.228469	5.6471	1.63e-08	1.55e-07	study5_a-Ketoglutarate_vs_Glu
718	C3_04940W_A	2120.48	1.12998	0.148194	7.62503	2.44e-14	4.72e-13	study5_a-Ketoglutarate_vs_Glu
719	C4_04030W_A	31364.8	10.4038	0.232495	44.7484	0	0	study5_a-Ketoglutarate_vs_Glu
720	C6_02330W_A	15572.1	1.93678	0.199018	9.73169	2.21e-22	8.61e-21	study5_a-Ketoglutarate_vs_Glu
721	CR_02220C_A	1191.13	1.30451	0.387351	3.36778	0.000757751	0.00275087	study5_a-Ketoglutarate_vs_Glu
722	C4_03270W_A	2232.5	1.02222	0.355546	2.87507	0.00403942	0.0117039	study5_a-Ketoglutarate_vs_Glu
723	C1_04040C_A	1652.12	1.60563	0.380773	4.21675	2.48e-05	0.000131213	study5_a-Ketoglutarate_vs_Glu
724	C1_12320C_A	4494.49	1.23218	0.183634	6.70994	1.95e-11	2.71e-10	study5_a-Ketoglutarate_vs_Glu
725	C3_03650W_A	1756.26	1.3329	0.381157	3.49698	0.000470562	0.0018029	study5_a-Ketoglutarate_vs_Glu
726	C5_04930C_A	2346.51	6.08398	0.366844	16.5846	9e-62	1.68e-59	study5_a-Ketoglutarate_vs_Glu
727	C1_09150W_A	534.242	3.45752	0.388641	8.89644	5.77e-19	1.79e-17	study5_a-Ketoglutarate_vs_Glu
728	CR_00600C_A	3001.67	1.66709	0.172638	9.65661	4.61e-22	1.76e-20	study5_a-Ketoglutarate_vs_Glu
729	CR_07030C_A	502.668	1.00062	0.294387	3.399	0.000676324	0.00248753	study5_a-Ketoglutarate_vs_Glu
730	C4_04160W_A	20669.6	3.80793	0.313528	12.1454	6.07e-34	4.61e-32	study5_a-Ketoglutarate_vs_Glu
731	C4_05730W_A	287.267	1.55368	0.345744	4.49373	7e-06	4.19e-05	study5_a-Ketoglutarate_vs_Glu
732	C3_05810C_A	392.08	1.31498	0.326171	4.03157	5.54e-05	0.000270099	study5_a-Ketoglutarate_vs_Glu
733	CR_08830W_A	4555.36	2.61618	0.441333	5.9279	3.07e-09	3.25e-08	study5_a-Ketoglutarate_vs_Glu
734	CR_07270C_A	644.009	1.70253	0.245611	6.93185	4.15e-12	6.38e-11	study5_a-Ketoglutarate_vs_Glu
735	C1_08080C_A	5006.87	2.19811	0.201071	10.932	8.1e-28	4.8e-26	study5_a-Ketoglutarate_vs_Glu
736	C3_01640C_A	49.2113	1.93339	0.452682	4.27097	1.95e-05	0.000105208	study5_a-Ketoglutarate_vs_Glu
737	C1_09320C_A	3393.08	1.69204	0.152825	11.0717	1.72e-28	1.09e-26	study5_a-Ketoglutarate_vs_Glu
738	C1_11890W_A	1741.68	1.54217	0.19623	7.85898	3.87e-15	8.06e-14	study5_a-Ketoglutarate_vs_Glu
739	C2_04950C_A	12274.4	1.75464	0.230533	7.61123	2.71e-14	5.21e-13	study5_a-Ketoglutarate_vs_Glu
740	C5_01490C_A	1328.44	1.08686	0.227358	4.78039	1.75e-06	1.18e-05	study5_a-Ketoglutarate_vs_Glu
741	C3_07160W_A	879.474	1.91572	0.292959	6.53921	6.18e-11	8.16e-10	study5_a-Ketoglutarate_vs_Glu
742	CR_07530C_A	1482.43	1.02924	0.257413	3.9984	6.38e-05	0.000306727	study5_a-Ketoglutarate_vs_Glu
743	C3_03790W_A	1357.13	1.4868	0.287357	5.17404	2.29e-07	1.82e-06	study5_a-Ketoglutarate_vs_Glu
744	C1_06610C_A	2342.08	3.27843	0.431197	7.60308	2.89e-14	5.53e-13	study5_a-Ketoglutarate_vs_Glu
745	C5_05360C_A	1638.64	1.03487	0.25976	3.98394	6.78e-05	0.000323267	study5_a-Ketoglutarate_vs_Glu
746	C4_05580C_A	1190.2	9.87165	1.05226	9.38135	6.51e-21	2.25e-19	study5_a-Ketoglutarate_vs_Glu
747	CR_02390W_A	5068.79	1.09786	0.170285	6.44722	1.14e-10	1.46e-09	study5_a-Ketoglutarate_vs_Glu
748	C2_03760C_A	7374.07	1.23777	0.171955	7.19819	6.1e-13	1.03e-11	study5_a-Ketoglutarate_vs_Glu
749	C3_04910C_A	9453.03	1.58822	0.29732	5.34179	9.2e-08	7.83e-07	study5_a-Ketoglutarate_vs_Glu
750	C6_03840C_A	2293.46	1.46874	0.244312	6.01171	1.84e-09	2e-08	study5_a-Ketoglutarate_vs_Glu
751	C5_04270C_A	9241.88	1.16994	0.37681	3.10485	0.00190376	0.00616917	study5_a-Ketoglutarate_vs_Glu
752	CR_03500W_A	13963.3	2.25703	0.400108	5.64105	1.69e-08	1.6e-07	study5_a-Ketoglutarate_vs_Glu
753	C1_14290C_A	23981.3	1.02456	0.205988	4.97392	6.56e-07	4.83e-06	study5_a-Ketoglutarate_vs_Glu
754	CR_02510W_A	6805.91	1.97886	0.239088	8.27668	1.27e-16	3.21e-15	study5_a-Ketoglutarate_vs_Glu
755	C1_07160C_A	21206.5	3.95054	1.2454	3.1721	0.00151341	0.0050532	study5_a-Ketoglutarate_vs_Glu
756	C3_01960C_A	8069.84	1.46067	0.20197	7.23209	4.76e-13	8.05e-12	study5_a-Ketoglutarate_vs_Glu
757	C4_01170C_A	140.812	2.83181	0.401105	7.06002	1.66e-12	2.63e-11	study5_a-Ketoglutarate_vs_Glu
758	C6_00920W_A	3550.66	2.20881	0.242874	9.09448	9.5e-20	3.18e-18	study5_a-Ketoglutarate_vs_Glu
759	C2_07160W_A	5368.37	2.09271	0.21788	9.60487	7.63e-22	2.85e-20	study5_a-Ketoglutarate_vs_Glu
760	C2_06600W_A	13007.7	2.52326	0.231933	10.8793	1.45e-27	8.49e-26	study5_a-Ketoglutarate_vs_Glu
761	C7_03740C_A	109.733	3.23484	0.583065	5.54799	2.89e-08	2.65e-07	study5_a-Ketoglutarate_vs_Glu
762	C3_01850W_A	1468.67	1.12199	0.29266	3.83376	0.0001262	0.000563621	study5_a-Ketoglutarate_vs_Glu
763	C1_14120C_A	3358.32	1.00907	0.287819	3.50593	0.000455018	0.00175097	study5_a-Ketoglutarate_vs_Glu
764	C3_02720W_A	924.345	1.08345	0.225402	4.80675	1.53e-06	1.04e-05	study5_a-Ketoglutarate_vs_Glu
765	C1_02530C_A	12726	1.7723	0.281608	6.2935	3.1e-10	3.8e-09	study5_a-Ketoglutarate_vs_Glu
766	C1_11630C_A	54.1345	1.42129	0.407112	3.49115	0.000480939	0.00183922	study5_a-Ketoglutarate_vs_Glu
767	C3_04000C_A	7585.76	5.0125	0.385165	13.0139	1.02e-38	9.97e-37	study5_a-Ketoglutarate_vs_Glu
768	C1_05140W_A	7898.93	1.85892	0.482982	3.84885	0.000118673	0.00053217	study5_a-Ketoglutarate_vs_Glu
769	C4_02930W_A	4777.78	2.74112	0.408536	6.70961	1.95e-11	2.71e-10	study5_a-Ketoglutarate_vs_Glu
770	C4_02230C_A	203.595	4.62831	0.538169	8.6001	7.96e-18	2.19e-16	study5_a-Ketoglutarate_vs_Glu
771	CR_00330C_A	3422.21	2.66663	0.215845	12.3543	4.61e-35	3.74e-33	study5_a-Ketoglutarate_vs_Glu
772	C6_01780C_A	811.379	1.20531	0.31008	3.8871	0.000101447	0.000460288	study5_a-Ketoglutarate_vs_Glu
773	C6_02660C_A	182.38	1.39192	0.331215	4.20246	2.64e-05	0.000138824	study5_a-Ketoglutarate_vs_Glu
774	C4_01070W_A	53529	10.7371	0.263215	40.7922	0	0	study5_a-Ketoglutarate_vs_Glu
775	C5_02590C_A	534.045	1.76231	0.491071	3.58871	0.000332316	0.00132689	study5_a-Ketoglutarate_vs_Glu
776	CR_06580W_A	6.81126	2.93358	1.12462	2.6085	0.0090941	0.0233594	study5_a-Ketoglutarate_vs_Glu
777	C4_03930C_A	895.201	1.0519	0.193371	5.4398	5.33e-08	4.68e-07	study5_a-Ketoglutarate_vs_Glu
778	C1_04390C_A	2700.95	1.25087	0.35393	3.53424	0.000408956	0.00159162	study5_a-Ketoglutarate_vs_Glu
779	CR_02550C_A	882.508	1.22124	0.285838	4.27249	1.93e-05	0.000104677	study5_a-Ketoglutarate_vs_Glu
780	C6_00810C_A	67.8296	1.98331	0.518787	3.82296	0.000131858	0.000584905	study5_a-Ketoglutarate_vs_Glu
781	C5_04190W_A	120.363	1.97614	0.469151	4.21217	2.53e-05	0.00013356	study5_a-Ketoglutarate_vs_Glu
782	C2_01960C_A	186.799	1.72138	0.344213	5.00092	5.71e-07	4.25e-06	study5_a-Ketoglutarate_vs_Glu
783	C1_01130W_A	4965.26	1.57469	0.286976	5.48719	4.08e-08	3.64e-07	study5_a-Ketoglutarate_vs_Glu
784	CR_08210C_A	30583.6	3.73143	0.348585	10.7045	9.69e-27	5.15e-25	study5_a-Ketoglutarate_vs_Glu
785	C5_00180W_A	4003.61	1.01026	0.292742	3.45104	0.000558433	0.00210304	study5_a-Ketoglutarate_vs_Glu
786	C7_00350C_A	24592.3	2.19301	0.905794	2.42109	0.0154741	0.0367995	study5_a-Ketoglutarate_vs_Glu
787	CR_00530W_A	162.917	4.98287	0.492237	10.1229	4.37e-24	1.9e-22	study5_a-Ketoglutarate_vs_Glu
788	C5_04830W_A	2010.19	1.04297	0.180219	5.78721	7.16e-09	7.11e-08	study5_a-Ketoglutarate_vs_Glu
789	CR_05050W_A	28269.9	1.43648	0.179269	8.01302	1.12e-15	2.48e-14	study5_a-Ketoglutarate_vs_Glu
790	C1_02040C_A	3402.17	1.0584	0.307753	3.43912	0.000583608	0.00219102	study5_a-Ketoglutarate_vs_Glu
791	C2_01660C_A	2026.96	1.09632	0.258822	4.23582	2.28e-05	0.000121709	study5_a-Ketoglutarate_vs_Glu
792	CR_02620C_A	3148.62	1.7515	0.209805	8.34825	6.93e-17	1.78e-15	study5_a-Ketoglutarate_vs_Glu
793	CR_02240C_A	164.262	1.44411	0.445692	3.24016	0.00119462	0.0041114	study5_a-Ketoglutarate_vs_Glu
794	C7_01010W_A	84.0673	1.02148	0.334572	3.05308	0.00226504	0.00712613	study5_a-Ketoglutarate_vs_Glu
795	C3_06060W_A	1374.54	1.38911	0.27529	5.046	4.51e-07	3.41e-06	study5_a-Ketoglutarate_vs_Glu
796	C1_07870C_A	13353.5	1.10001	0.261317	4.20947	2.56e-05	0.000134935	study5_a-Ketoglutarate_vs_Glu
797	C4_03350C_A	819.834	1.33045	0.279314	4.76328	1.9e-06	1.27e-05	study5_a-Ketoglutarate_vs_Glu
798	C1_12850W_A	18250.2	4.48465	0.508165	8.82519	1.09e-18	3.3e-17	study5_a-Ketoglutarate_vs_Glu
799	C5_04180W_A	414.279	1.16269	0.424005	2.74216	0.0061036	0.0166487	study5_a-Ketoglutarate_vs_Glu
800	C4_05870C_A	35.3358	5.81325	1.09764	5.29615	1.18e-07	9.87e-07	study5_a-Ketoglutarate_vs_Glu
801	C2_04550C_A	7200.16	2.67249	0.282838	9.44881	3.43e-21	1.21e-19	study5_a-Ketoglutarate_vs_Glu
802	C1_03680W_A	4889.5	1.28944	0.314729	4.097	4.19e-05	0.000210881	study5_a-Ketoglutarate_vs_Glu
803	C1_02210W_A	6231.96	1.05466	0.295292	3.57159	0.000354826	0.00140583	study5_a-Ketoglutarate_vs_Glu
804	C2_05360C_A	452.869	1.0693	0.339228	3.15216	0.00162067	0.00536766	study5_a-Ketoglutarate_vs_Glu
805	C2_04080W_A	4354.05	1.46798	0.305514	4.80496	1.55e-06	1.05e-05	study5_a-Ketoglutarate_vs_Glu
806	CR_08920W_A	2280.75	1.26036	0.288541	4.36805	1.25e-05	7.11e-05	study5_a-Ketoglutarate_vs_Glu
807	C3_06950W_A	617.351	1.65935	0.286884	5.78403	7.29e-09	7.22e-08	study5_a-Ketoglutarate_vs_Glu
808	C1_02700C_A	2670.21	1.56362	0.374315	4.17729	2.95e-05	0.000153703	study5_a-Ketoglutarate_vs_Glu
809	C5_01800C_A	3529.2	1.13792	0.316381	3.59668	0.000322311	0.00129281	study5_a-Ketoglutarate_vs_Glu
810	CR_05680C_A	372.985	1.03994	0.323329	3.21635	0.0012983	0.00440908	study5_a-Ketoglutarate_vs_Glu
811	C1_03790C_A	5351.71	1.33782	0.455006	2.94022	0.00327976	0.00982172	study5_a-Ketoglutarate_vs_Glu
812	C3_01090W_A	1490.97	2.07795	0.262279	7.92265	2.33e-15	4.92e-14	study5_a-Ketoglutarate_vs_Glu
813	C7_00660W_A	7043.35	2.21299	0.350816	6.30811	2.82e-10	3.49e-09	study5_a-Ketoglutarate_vs_Glu
814	C7_02430C_A	139.355	1.41723	0.304162	4.65946	3.17e-06	2.04e-05	study5_a-Ketoglutarate_vs_Glu
815	C4_04020C_A	3809.74	10.9066	0.622212	17.5288	8.64e-69	1.9e-66	study5_a-Ketoglutarate_vs_Glu
816	C4_02020W_A	6339.08	2.59133	0.179514	14.4352	3.11e-47	3.83e-45	study5_a-Ketoglutarate_vs_Glu
817	C1_07580C_A	288.544	3.8622	0.462752	8.34616	7.05e-17	1.81e-15	study5_a-Ketoglutarate_vs_Glu
818	C1_13110C_A	3385.58	1.01748	0.1952	5.21251	1.86e-07	1.51e-06	study5_a-Ketoglutarate_vs_Glu
819	C6_03400C_A	8856.76	1.60452	0.203231	7.89505	2.9e-15	6.1e-14	study5_a-Ketoglutarate_vs_Glu
820	C1_07420C_A	1158.31	1.16396	0.157953	7.36908	1.72e-13	3.01e-12	study5_a-Ketoglutarate_vs_Glu
821	C4_04540C_A	33.0727	1.61306	0.50595	3.18817	0.00143175	0.00480135	study5_a-Ketoglutarate_vs_Glu
822	C4_02500C_A	2537.59	2.49568	0.320088	7.79688	6.35e-15	1.29e-13	study5_a-Ketoglutarate_vs_Glu
823	CR_07820W_A	171.26	1.39941	0.278685	5.02149	5.13e-07	3.84e-06	study5_a-Ketoglutarate_vs_Glu
824	C3_03990C_A	360.26	3.59338	0.296135	12.1343	6.95e-34	5.22e-32	study5_a-Ketoglutarate_vs_Glu
825	C2_01010W_A	10021.3	2.09545	0.349605	5.99375	2.05e-09	2.22e-08	study5_a-Ketoglutarate_vs_Glu
826	C5_01600C_A	882.4	1.00417	0.382747	2.62359	0.00870086	0.0225468	study5_a-Ketoglutarate_vs_Glu
827	C2_10590W_A	7530.39	1.06026	0.366667	2.89161	0.00383278	0.0112	study5_a-Ketoglutarate_vs_Glu
828	C2_04050C_A	9167.53	1.71792	0.362312	4.74154	2.12e-06	1.41e-05	study5_a-Ketoglutarate_vs_Glu
829	CR_08540C_A	2545.89	1.14048	0.200772	5.68049	1.34e-08	1.29e-07	study5_a-Ketoglutarate_vs_Glu
830	C1_00170W_A	3892.36	1.41034	0.380956	3.70209	0.000213829	0.000893178	study5_a-Ketoglutarate_vs_Glu
831	C2_06720W_A	884.476	1.10465	0.223377	4.94521	7.61e-07	5.53e-06	study5_a-Ketoglutarate_vs_Glu
832	C2_06730W_A	13621.6	1.06564	0.228321	4.66728	3.05e-06	1.97e-05	study5_a-Ketoglutarate_vs_Glu
833	CR_08690C_A	2217.73	1.77359	0.245843	7.2143	5.42e-13	9.14e-12	study5_a-Ketoglutarate_vs_Glu
834	C4_05700W_A	718.935	5.94958	0.359135	16.5664	1.22e-61	2.21e-59	study5_a-Ketoglutarate_vs_Glu
835	C1_09580C_A	134.132	1.30705	0.42466	3.07788	0.00208478	0.00665078	study5_a-Ketoglutarate_vs_Glu
836	C1_01220C_A	3229.27	2.32518	0.395867	5.87365	4.26e-09	4.4e-08	study5_a-Ketoglutarate_vs_Glu
837	C1_13840W_A	2855.13	1.32111	0.213889	6.17662	6.55e-10	7.65e-09	study5_a-Ketoglutarate_vs_Glu
838	CR_02070C_A	26534.8	2.09785	0.536819	3.90793	9.31e-05	0.000426766	study5_a-Ketoglutarate_vs_Glu
839	C1_08580C_A	1305.03	1.53695	0.174452	8.81017	1.25e-18	3.75e-17	study5_a-Ketoglutarate_vs_Glu
840	CR_04930W_A	3623.16	1.09696	0.185825	5.90321	3.57e-09	3.74e-08	study5_a-Ketoglutarate_vs_Glu
841	CR_09060W_A	332.861	1.10355	0.272356	4.05187	5.08e-05	0.000251075	study5_a-Ketoglutarate_vs_Glu
842	CR_00150C_A	4462.07	1.53236	0.188363	8.13514	4.11e-16	9.63e-15	study5_a-Ketoglutarate_vs_Glu
843	C1_03720C_A	2058.02	1.1969	0.211641	5.65536	1.56e-08	1.48e-07	study5_a-Ketoglutarate_vs_Glu
844	C1_04610W_A	41073.9	1.58199	0.221351	7.14697	8.87e-13	1.46e-11	study5_a-Ketoglutarate_vs_Glu
845	C1_08370W_A	14137.4	2.32517	0.347024	6.70032	2.08e-11	2.87e-10	study5_a-Ketoglutarate_vs_Glu
846	C3_05640W_A	4.63582	3.5773	1.49607	2.39113	0.0167967	0.03952	study5_a-Ketoglutarate_vs_Glu
847	CR_01330W_A	4345.3	2.58754	0.415605	6.22596	4.79e-10	5.68e-09	study5_a-Ketoglutarate_vs_Glu
848	C1_12100C_A	1446.26	2.52452	0.204959	12.3172	7.32e-35	5.86e-33	study5_a-Ketoglutarate_vs_Glu
849	C2_07840W_A	19.6715	3.44127	0.87232	3.94496	7.98e-05	0.000371438	study5_a-Ketoglutarate_vs_Glu
850	CR_00310C_A	3726.5	1.28364	0.424993	3.02038	0.00252462	0.00783076	study5_a-Ketoglutarate_vs_Glu
851	C3_00810C_A	9362.76	2.65724	0.246687	10.7717	4.68e-27	2.62e-25	study5_a-Ketoglutarate_vs_Glu
852	C1_13330C_A	4071.26	1.11071	0.229867	4.83197	1.35e-06	9.33e-06	study5_a-Ketoglutarate_vs_Glu
853	C3_02650W_A	93.0035	1.62665	0.323179	5.03328	4.82e-07	3.63e-06	study5_a-Ketoglutarate_vs_Glu
854	CR_09920W_A	4261.07	3.3809	0.486594	6.94809	3.7e-12	5.74e-11	study5_a-Ketoglutarate_vs_Glu
855	C4_00110C_A	1971.23	1.63682	0.260514	6.28302	3.32e-10	4.03e-09	study5_a-Ketoglutarate_vs_Glu
856	CR_09530C_A	5428.85	1.40978	0.301735	4.67224	2.98e-06	1.92e-05	study5_a-Ketoglutarate_vs_Glu
857	C7_03930C_A	4591.33	1.3099	0.214783	6.09873	1.07e-09	1.21e-08	study5_a-Ketoglutarate_vs_Glu
858	C4_01200C_A	1941.48	1.23154	0.319187	3.85837	0.000114147	0.000513372	study5_a-Ketoglutarate_vs_Glu
859	C4_02080W_A	80.5235	1.22652	0.487486	2.51601	0.0118693	0.0294318	study5_a-Ketoglutarate_vs_Glu
860	C1_07080W_A	1526.68	2.13255	0.342476	6.22686	4.76e-10	5.66e-09	study5_a-Ketoglutarate_vs_Glu
861	C5_02220C_A	921.057	1.07478	0.239823	4.48157	7.41e-06	4.42e-05	study5_a-Ketoglutarate_vs_Glu
862	C3_02290W_A	975.152	1.05134	0.265416	3.9611	7.46e-05	0.000351175	study5_a-Ketoglutarate_vs_Glu
863	C6_04180W_A	1949.74	1.74339	0.192166	9.07231	1.17e-19	2.85e-18	study5_Casamino_acid_vs_Glu
864	CR_01470W_A	18796.6	2.14765	0.246724	8.70464	3.19e-18	7.06e-17	study5_Casamino_acid_vs_Glu
865	CR_00300W_A	122.347	2.3002	0.505343	4.55175	5.32e-06	2.85e-05	study5_Casamino_acid_vs_Glu
866	CR_05340C_A	14714.5	3.47251	1.04352	3.3277	0.000875655	0.00282273	study5_Casamino_acid_vs_Glu
867	C1_01990W_A	81.24	5.54486	0.528601	10.4897	9.63e-26	3.68e-24	study5_Casamino_acid_vs_Glu
868	C3_02910W_A	13.3696	1.96018	0.693409	2.82688	0.0047004	0.0125542	study5_Casamino_acid_vs_Glu
869	C2_09120C_A	90.6746	2.73479	0.359607	7.60494	2.85e-14	4.4e-13	study5_Casamino_acid_vs_Glu
870	C2_03080W_A	10726.4	1.56945	0.313955	4.99896	5.76e-07	3.7e-06	study5_Casamino_acid_vs_Glu
871	CR_07920W_A	4485.91	1.80413	0.236845	7.61735	2.59e-14	4.02e-13	study5_Casamino_acid_vs_Glu
872	C4_06380W_A	28.3916	2.73956	0.619325	4.42346	9.71e-06	4.93e-05	study5_Casamino_acid_vs_Glu
873	CR_00610W_A	704.35	2.19278	0.250961	8.73753	2.38e-18	5.33e-17	study5_Casamino_acid_vs_Glu
874	CR_08870W_A	2570.77	2.00036	0.164044	12.194	3.34e-34	1.89e-32	study5_Casamino_acid_vs_Glu
875	CR_00930W_A	3865.76	8.16137	0.600539	13.5901	4.59e-42	3.44e-40	study5_Casamino_acid_vs_Glu
876	C5_00540C_A	722.277	10.0062	1.50165	6.66344	2.67e-11	3.09e-10	study5_Casamino_acid_vs_Glu
877	CR_10140W_A	8547.83	2.5521	0.24002	10.6329	2.1e-26	8.32e-25	study5_Casamino_acid_vs_Glu
878	CR_09570W_A	845.507	1.88553	0.268305	7.02754	2.1e-12	2.71e-11	study5_Casamino_acid_vs_Glu
879	C7_01070C_A	3443.31	1.62353	0.233178	6.96265	3.34e-12	4.21e-11	study5_Casamino_acid_vs_Glu
880	C1_00350C_A	2464.5	1.43998	0.323225	4.45505	8.39e-06	4.3e-05	study5_Casamino_acid_vs_Glu
881	C2_08650W_A	3865.76	1.3887	0.188054	7.38455	1.53e-13	2.19e-12	study5_Casamino_acid_vs_Glu
882	C1_03940W_A	7444.33	1.6872	0.208539	8.09056	5.94e-16	1.1e-14	study5_Casamino_acid_vs_Glu
883	CR_05730C_A	3867.2	1.88253	0.365473	5.15093	2.59e-07	1.75e-06	study5_Casamino_acid_vs_Glu
884	C1_01440C_A	150.87	2.57271	0.357892	7.1885	6.55e-13	8.81e-12	study5_Casamino_acid_vs_Glu
885	C3_06900W_A	1566.46	1.4343	0.162809	8.80967	1.26e-18	2.87e-17	study5_Casamino_acid_vs_Glu
886	C1_07980C_A	1688.98	2.75287	0.401329	6.85939	6.92e-12	8.52e-11	study5_Casamino_acid_vs_Glu
887	C2_06590C_A	655.562	1.35051	0.293967	4.59409	4.35e-06	2.38e-05	study5_Casamino_acid_vs_Glu
888	C7_04180W_A	2588.97	2.14601	0.22673	9.46507	2.93e-21	8.06e-20	study5_Casamino_acid_vs_Glu
889	C2_04170C_A	6752.59	1.46954	0.186615	7.8747	3.42e-15	5.73e-14	study5_Casamino_acid_vs_Glu
890	C3_02920W_A	2403.91	1.34689	0.241775	5.57086	2.53e-08	2e-07	study5_Casamino_acid_vs_Glu
891	C5_01670W_A	77.9493	1.0786	0.361162	2.98649	0.00282202	0.00796662	study5_Casamino_acid_vs_Glu
892	C2_01750C_A	5478.19	1.52962	0.270988	5.6446	1.66e-08	1.34e-07	study5_Casamino_acid_vs_Glu
893	C2_01890W_A	1458.17	1.00855	0.354535	2.84471	0.00444513	0.0119357	study5_Casamino_acid_vs_Glu
894	C3_07760C_A	393.12	1.86446	0.266233	7.00313	2.5e-12	3.21e-11	study5_Casamino_acid_vs_Glu
895	C7_01510W_A	6052.83	5.05868	0.375533	13.4707	2.33e-41	1.71e-39	study5_Casamino_acid_vs_Glu
896	C2_01390W_A	3740.26	1.01437	0.177898	5.702	1.18e-08	9.79e-08	study5_Casamino_acid_vs_Glu
897	C1_13550C_A	1666.15	1.01776	0.22159	4.59298	4.37e-06	2.39e-05	study5_Casamino_acid_vs_Glu
898	CR_01300W_A	2549.76	1.63389	0.241744	6.75875	1.39e-11	1.66e-10	study5_Casamino_acid_vs_Glu
899	C5_00640C_A	2158.73	1.57265	0.211663	7.42998	1.09e-13	1.57e-12	study5_Casamino_acid_vs_Glu
900	C2_02600C_A	186.904	2.54895	0.315221	8.08623	6.15e-16	1.13e-14	study5_Casamino_acid_vs_Glu
901	C3_07070C_A	2112.74	3.28604	0.326288	10.071	7.42e-24	2.48e-22	study5_Casamino_acid_vs_Glu
902	C3_03710W_A	1070.08	1.61054	0.263085	6.12176	9.25e-10	8.88e-09	study5_Casamino_acid_vs_Glu
903	C3_04080W_A	9066.42	1.58027	0.242744	6.51005	7.51e-11	8.33e-10	study5_Casamino_acid_vs_Glu
904	C1_04460C_A	1242.07	2.49205	0.352646	7.06672	1.59e-12	2.07e-11	study5_Casamino_acid_vs_Glu
905	C1_12890W_A	295.599	1.00743	0.295353	3.41094	0.000647403	0.00216047	study5_Casamino_acid_vs_Glu
906	C1_12570C_A	1767.96	1.20488	0.178363	6.7552	1.43e-11	1.7e-10	study5_Casamino_acid_vs_Glu
907	C2_06710W_A	464.786	1.59636	0.229827	6.94591	3.76e-12	4.73e-11	study5_Casamino_acid_vs_Glu
908	C1_02270C_A	2295.02	4.23775	0.206396	20.5321	1.11e-93	3.6e-91	study5_Casamino_acid_vs_Glu
909	C5_02890W_A	10433.9	1.13127	0.244627	4.62447	3.76e-06	2.09e-05	study5_Casamino_acid_vs_Glu
910	C5_01260W_A	186.804	2.28619	0.402457	5.68057	1.34e-08	1.1e-07	study5_Casamino_acid_vs_Glu
911	CR_01860W_A	56.5299	1.19107	0.449659	2.64883	0.00807703	0.0201174	study5_Casamino_acid_vs_Glu
912	C2_05250C_A	18756.6	2.23816	0.347953	6.43237	1.26e-10	1.35e-09	study5_Casamino_acid_vs_Glu
913	C1_13470W_A	1065.91	1.43725	0.22707	6.32953	2.46e-10	2.56e-09	study5_Casamino_acid_vs_Glu
914	C7_01750W_A	542.838	2.81715	0.250455	11.2481	2.37e-29	1.1e-27	study5_Casamino_acid_vs_Glu
915	CR_05940W_A	45.8652	2.4797	0.412111	6.01706	1.78e-09	1.63e-08	study5_Casamino_acid_vs_Glu
916	C2_08700C_A	1587.97	1.23547	0.204626	6.03769	1.56e-09	1.45e-08	study5_Casamino_acid_vs_Glu
917	C2_06300W_A	743.662	1.2183	0.196999	6.18431	6.24e-10	6.16e-09	study5_Casamino_acid_vs_Glu
918	C6_01720C_A	8307.91	1.36658	0.220963	6.18465	6.22e-10	6.16e-09	study5_Casamino_acid_vs_Glu
919	C2_10100W_A	501.286	1.14625	0.288698	3.97042	7.17e-05	0.000301736	study5_Casamino_acid_vs_Glu
920	C6_00250W_A	2820.89	1.28875	0.224586	5.73834	9.56e-09	8.11e-08	study5_Casamino_acid_vs_Glu
921	C2_09080C_A	4.0441	4.65639	1.81051	2.57186	0.0101153	0.024539	study5_Casamino_acid_vs_Glu
922	C5_05240C_A	44.4325	2.26861	0.470162	4.82517	1.4e-06	8.44e-06	study5_Casamino_acid_vs_Glu
923	C4_02200C_A	595.904	1.86954	0.246962	7.57016	3.73e-14	5.68e-13	study5_Casamino_acid_vs_Glu
924	C2_00480C_A	1212.6	1.88791	0.4528	4.16941	3.05e-05	0.000140738	study5_Casamino_acid_vs_Glu
925	C1_04360C_A	9352.98	1.68082	0.265368	6.33394	2.39e-10	2.49e-09	study5_Casamino_acid_vs_Glu
926	C6_02620C_A	35.5005	1.96253	0.721362	2.7206	0.00651642	0.0166618	study5_Casamino_acid_vs_Glu
927	C5_00450C_A	3889.14	1.03266	0.369088	2.79788	0.00514398	0.0135638	study5_Casamino_acid_vs_Glu
928	C3_00920W_A	5518.34	10.7522	0.519471	20.6984	3.58e-95	1.22e-92	study5_Casamino_acid_vs_Glu
929	C7_02490W_A	1949.92	1.05175	0.195994	5.36625	8.04e-08	5.91e-07	study5_Casamino_acid_vs_Glu
930	C2_08340C_A	103.781	2.95926	0.472669	6.26075	3.83e-10	3.89e-09	study5_Casamino_acid_vs_Glu
931	C5_03330C_A	1465.31	1.32977	0.161384	8.23979	1.73e-16	3.3e-15	study5_Casamino_acid_vs_Glu
932	C1_10140C_A	1694.79	1.63365	0.297865	5.48452	4.15e-08	3.16e-07	study5_Casamino_acid_vs_Glu
933	C1_13250W_A	1761.9	1.66577	0.243445	6.84251	7.78e-12	9.54e-11	study5_Casamino_acid_vs_Glu
934	C4_06390W_A	1442.46	1.2821	0.358117	3.58011	0.000343449	0.00122943	study5_Casamino_acid_vs_Glu
935	C3_03870C_A	3711.65	1.37762	0.257076	5.35878	8.38e-08	6.13e-07	study5_Casamino_acid_vs_Glu
936	C4_00130W_A	35511.8	1.64024	0.305347	5.37171	7.8e-08	5.74e-07	study5_Casamino_acid_vs_Glu
937	CR_07280W_A	169.948	1.32547	0.335716	3.94819	7.87e-05	0.000328037	study5_Casamino_acid_vs_Glu
938	C4_06540W_A	4646.94	1.70427	0.207659	8.20704	2.27e-16	4.31e-15	study5_Casamino_acid_vs_Glu
939	CR_09140C_A	4902.3	2.05158	0.400955	5.11673	3.11e-07	2.07e-06	study5_Casamino_acid_vs_Glu
940	C2_10050W_A	6684.71	1.00404	0.150367	6.67724	2.43e-11	2.83e-10	study5_Casamino_acid_vs_Glu
941	C2_00510W_A	777.642	1.45027	0.263671	5.5003	3.79e-08	2.91e-07	study5_Casamino_acid_vs_Glu
942	C1_11200W_A	14996.5	1.58794	0.337712	4.70205	2.58e-06	1.48e-05	study5_Casamino_acid_vs_Glu
943	CR_02750C_A	236.288	1.91105	0.443852	4.30561	1.67e-05	8.13e-05	study5_Casamino_acid_vs_Glu
944	CR_06490C_A	13583.2	1.29812	0.372047	3.48914	0.00048458	0.001664	study5_Casamino_acid_vs_Glu
945	C2_03470C_A	16716.8	1.30173	0.245485	5.30268	1.14e-07	8.23e-07	study5_Casamino_acid_vs_Glu
946	C7_01900W_A	6322.28	2.13322	0.233212	9.14709	5.85e-20	1.46e-18	study5_Casamino_acid_vs_Glu
947	C2_06070W_A	2691.92	2.93403	0.220721	13.2929	2.54e-40	1.78e-38	study5_Casamino_acid_vs_Glu
948	C3_01930W_A	8358.94	8.45879	0.301194	28.0842	1.53e-173	2.35e-170	study5_Casamino_acid_vs_Glu
949	C3_05650W_A	7214.94	1.11017	0.302231	3.67324	0.000239494	0.000890438	study5_Casamino_acid_vs_Glu
950	C2_00400C_A	5699.69	2.41968	0.222525	10.8737	1.54e-27	6.58e-26	study5_Casamino_acid_vs_Glu
951	C2_03570C_A	239.098	1.49487	0.225288	6.63535	3.24e-11	3.71e-10	study5_Casamino_acid_vs_Glu
952	C1_10730W_A	1872.22	1.09357	0.173591	6.29969	2.98e-10	3.06e-09	study5_Casamino_acid_vs_Glu
953	C4_01300W_A	10013.4	2.05746	0.240059	8.57067	1.03e-17	2.17e-16	study5_Casamino_acid_vs_Glu
954	C3_02940C_A	5132.18	1.62112	0.211775	7.65494	1.93e-14	3.02e-13	study5_Casamino_acid_vs_Glu
955	CR_10790W_A	1687.39	3.30164	0.362793	9.1006	8.98e-20	2.21e-18	study5_Casamino_acid_vs_Glu
956	C1_02890C_A	746.556	1.23491	0.271728	4.54465	5.5e-06	2.94e-05	study5_Casamino_acid_vs_Glu
957	C6_03670C_A	153.076	1.2191	0.313238	3.89191	9.95e-05	0.000405004	study5_Casamino_acid_vs_Glu
958	C1_12160W_A	2299.65	1.75265	0.240545	7.28614	3.19e-13	4.43e-12	study5_Casamino_acid_vs_Glu
959	C3_06450W_A	1323.56	4.50888	0.247878	18.19	6.2e-74	1.41e-71	study5_Casamino_acid_vs_Glu
960	CR_06150C_A	13364.7	2.3538	0.389314	6.04603	1.48e-09	1.38e-08	study5_Casamino_acid_vs_Glu
961	C1_13670W_A	9563.81	6.17676	0.377563	16.3596	3.72e-60	5.09e-58	study5_Casamino_acid_vs_Glu
962	C4_04720W_A	3389.58	1.31958	0.477602	2.76292	0.00572868	0.0148762	study5_Casamino_acid_vs_Glu
963	CR_07070C_A	7207.49	1.64628	0.50224	3.27787	0.00104594	0.00330588	study5_Casamino_acid_vs_Glu
964	C3_01320C_A	1968.17	2.48243	0.287088	8.64694	5.29e-18	1.16e-16	study5_Casamino_acid_vs_Glu
965	CR_07010W_A	12046	1.13933	0.372838	3.05583	0.00224438	0.00650289	study5_Casamino_acid_vs_Glu
966	C1_08350C_A	21765	2.59091	0.928584	2.79017	0.00526798	0.0138611	study5_Casamino_acid_vs_Glu
967	C5_05430W_A	1128.63	2.83372	0.335711	8.44093	3.15e-17	6.33e-16	study5_Casamino_acid_vs_Glu
968	C3_06290W_A	2310.15	1.03914	0.181758	5.71714	1.08e-08	9.07e-08	study5_Casamino_acid_vs_Glu
969	C6_02980C_A	5419.01	1.1449	0.15245	7.50997	5.91e-14	8.82e-13	study5_Casamino_acid_vs_Glu
970	C3_04930C_A	2424.34	2.75254	0.220849	12.4634	1.18e-35	7.07e-34	study5_Casamino_acid_vs_Glu
971	C4_02900C_A	2631.01	1.31596	0.501298	2.6251	0.00866244	0.0213938	study5_Casamino_acid_vs_Glu
972	C7_02170C_A	2083.95	1.05204	0.196513	5.35352	8.63e-08	6.29e-07	study5_Casamino_acid_vs_Glu
973	C2_04000C_A	105.504	3.00828	0.772096	3.89625	9.77e-05	0.000398348	study5_Casamino_acid_vs_Glu
974	C1_12250C_A	2841.8	1.4139	0.329605	4.28966	1.79e-05	8.67e-05	study5_Casamino_acid_vs_Glu
975	C5_05300W_A	2984.9	1.02074	0.235869	4.32758	1.51e-05	7.4e-05	study5_Casamino_acid_vs_Glu
976	C2_06290C_A	7455.11	1.25566	0.191653	6.55175	5.69e-11	6.39e-10	study5_Casamino_acid_vs_Glu
977	C1_11260C_A	104.873	1.26615	0.456828	2.77161	0.00557796	0.01454	study5_Casamino_acid_vs_Glu
978	C2_08660C_A	334.354	1.60486	0.259628	6.18137	6.35e-10	6.27e-09	study5_Casamino_acid_vs_Glu
979	C3_07060W_A	6800.24	1.56751	0.224689	6.97633	3.03e-12	3.85e-11	study5_Casamino_acid_vs_Glu
980	CR_09210W_A	1477.61	2.72037	0.216052	12.5913	2.36e-36	1.48e-34	study5_Casamino_acid_vs_Glu
981	C6_02450W_A	863.413	2.71476	0.507278	5.35162	8.72e-08	6.34e-07	study5_Casamino_acid_vs_Glu
982	C5_04490C_A	11498	5.02501	0.260236	19.3094	4.47e-83	1.2e-80	study5_Casamino_acid_vs_Glu
983	C5_01400W_A	424.229	2.54779	0.404336	6.30118	2.95e-10	3.04e-09	study5_Casamino_acid_vs_Glu
984	CR_07420W_A	15516.4	2.81389	0.201421	13.9702	2.37e-44	1.92e-42	study5_Casamino_acid_vs_Glu
985	C1_05150C_A	32.0967	2.38766	0.597127	3.99859	6.37e-05	0.000272079	study5_Casamino_acid_vs_Glu
986	C5_03600W_A	2414.28	1.59725	0.446067	3.58075	0.000342615	0.00122787	study5_Casamino_acid_vs_Glu
987	C4_04400C_A	649.293	5.70909	0.340942	16.7451	6.15e-63	9.47e-61	study5_Casamino_acid_vs_Glu
988	C3_00850C_A	24055.3	1.57756	0.231078	6.82697	8.67e-12	1.06e-10	study5_Casamino_acid_vs_Glu
989	CR_07140C_A	357.709	1.38562	0.420994	3.29131	0.000997234	0.0031682	study5_Casamino_acid_vs_Glu
990	C5_05230C_A	20595.3	1.72638	0.275231	6.27248	3.55e-10	3.62e-09	study5_Casamino_acid_vs_Glu
991	CR_04740C_A	6499.55	1.02742	0.414178	2.48063	0.013115	0.0306797	study5_Casamino_acid_vs_Glu
992	C6_03850C_A	4760.78	3.98079	0.401777	9.90795	3.84e-23	1.23e-21	study5_Casamino_acid_vs_Glu
993	C1_05370C_A	1572.01	1.06662	0.245403	4.34638	1.38e-05	6.82e-05	study5_Casamino_acid_vs_Glu
994	CR_10170C_A	2026.81	1.29573	0.288808	4.48648	7.24e-06	3.76e-05	study5_Casamino_acid_vs_Glu
995	C5_04130C_A	13949.2	2.06174	0.406914	5.06678	4.05e-07	2.65e-06	study5_Casamino_acid_vs_Glu
996	C1_06810W_A	19820.9	5.25607	0.318111	16.5228	2.52e-61	3.52e-59	study5_Casamino_acid_vs_Glu
997	C4_00960W_A	1651.38	1.20372	0.253095	4.75599	1.97e-06	1.16e-05	study5_Casamino_acid_vs_Glu
998	C2_04670W_A	138.156	1.82002	0.418607	4.34779	1.38e-05	6.78e-05	study5_Casamino_acid_vs_Glu
999	CR_08880C_A	48.6398	3.20158	0.741739	4.31632	1.59e-05	7.76e-05	study5_Casamino_acid_vs_Glu
1000	C1_13410W_A	1680.03	1.75621	0.158563	11.0758	1.64e-28	7.34e-27	study5_Casamino_acid_vs_Glu
1001	C1_11760C_A	2346.26	1.53939	0.148143	10.3912	2.72e-25	1.01e-23	study5_Casamino_acid_vs_Glu
1002	C1_01630W_A	3440.25	2.25513	0.305666	7.37774	1.61e-13	2.29e-12	study5_Casamino_acid_vs_Glu
1003	C5_03130W_A	3426.37	1.95181	0.418789	4.66061	3.15e-06	1.77e-05	study5_Casamino_acid_vs_Glu
1004	C1_07600W_A	3944.95	1.78093	0.231468	7.69407	1.43e-14	2.27e-13	study5_Casamino_acid_vs_Glu
1005	C1_03150C_A	1718.07	1.41164	0.19191	7.35574	1.9e-13	2.69e-12	study5_Casamino_acid_vs_Glu
1006	C1_05890W_A	1583.93	6.56384	0.506462	12.9602	2.06e-38	1.38e-36	study5_Casamino_acid_vs_Glu
1007	C2_03710W_A	22.5725	3.14891	0.988233	3.1864	0.00144055	0.00439954	study5_Casamino_acid_vs_Glu
1008	C2_00920W_A	639.684	1.54882	0.241055	6.42518	1.32e-10	1.41e-09	study5_Casamino_acid_vs_Glu
1009	CR_08700C_A	1699.91	1.55604	0.337649	4.60845	4.06e-06	2.24e-05	study5_Casamino_acid_vs_Glu
1010	C6_02040W_A	14108.1	1.36375	0.143129	9.52815	1.6e-21	4.48e-20	study5_Casamino_acid_vs_Glu
1011	CR_01200W_A	413.659	2.02391	0.273037	7.41258	1.24e-13	1.78e-12	study5_Casamino_acid_vs_Glu
1012	C7_03280C_A	4837.32	4.20852	0.298246	14.1109	3.25e-45	2.67e-43	study5_Casamino_acid_vs_Glu
1013	C4_02730C_A	7.19815	2.45338	1.07711	2.27774	0.0227419	0.0494429	study5_Casamino_acid_vs_Glu
1014	C1_01980W_A	9721.58	4.46524	0.357261	12.4985	7.6e-36	4.64e-34	study5_Casamino_acid_vs_Glu
1015	CR_08250C_A	29892.3	1.9828	0.52511	3.77597	0.000159384	0.000617574	study5_Casamino_acid_vs_Glu
1016	C6_03370W_A	28095.7	4.06422	0.263795	15.4067	1.47e-53	1.57e-51	study5_Casamino_acid_vs_Glu
1017	C1_05180C_A	1661.79	1.42628	0.217379	6.56127	5.34e-11	6.02e-10	study5_Casamino_acid_vs_Glu
1018	C2_03520C_A	23571.8	1.48204	0.200909	7.37667	1.62e-13	2.31e-12	study5_Casamino_acid_vs_Glu
1019	CR_08670C_A	1343.01	3.28625	0.308176	10.6635	1.51e-26	6.03e-25	study5_Casamino_acid_vs_Glu
1020	C3_00210C_A	392.315	1.6603	0.246447	6.73695	1.62e-11	1.91e-10	study5_Casamino_acid_vs_Glu
1021	C7_00930W_A	25830.2	1.56606	0.385704	4.06025	4.9e-05	0.000214817	study5_Casamino_acid_vs_Glu
1022	CR_06670W_A	131.39	4.27372	1.01461	4.2122	2.53e-05	0.000119317	study5_Casamino_acid_vs_Glu
1023	C2_08140C_A	6327.25	1.08936	0.239582	4.54692	5.44e-06	2.91e-05	study5_Casamino_acid_vs_Glu
1024	CR_09190C_A	927.503	1.55508	0.187981	8.27252	1.31e-16	2.56e-15	study5_Casamino_acid_vs_Glu
1025	C2_01760C_A	209.813	1.1379	0.234606	4.85025	1.23e-06	7.51e-06	study5_Casamino_acid_vs_Glu
1026	C3_01420C_A	3101.85	1.57248	0.234398	6.7086	1.97e-11	2.3e-10	study5_Casamino_acid_vs_Glu
1027	C5_03060C_A	932.244	1.24076	0.436058	2.84539	0.00443567	0.0119155	study5_Casamino_acid_vs_Glu
1028	C4_00980C_A	39.4445	1.41066	0.536289	2.6304	0.00852837	0.021105	study5_Casamino_acid_vs_Glu
1029	C3_05630W_A	173.927	3.44482	0.626643	5.49726	3.86e-08	2.96e-07	study5_Casamino_acid_vs_Glu
1030	CR_08550W_A	4282.86	1.67216	0.242509	6.89525	5.38e-12	6.7e-11	study5_Casamino_acid_vs_Glu
1031	C1_08330C_A	18329.1	4.83834	0.245183	19.7336	1.11e-86	3.11e-84	study5_Casamino_acid_vs_Glu
1032	C2_01710W_A	843.516	1.36455	0.252259	5.40932	6.33e-08	4.71e-07	study5_Casamino_acid_vs_Glu
1033	C1_02120C_A	48598.2	1.90477	0.333167	5.71718	1.08e-08	9.07e-08	study5_Casamino_acid_vs_Glu
1034	C1_12880C_A	1695.49	1.52696	0.284832	5.36091	8.28e-08	6.08e-07	study5_Casamino_acid_vs_Glu
1035	C4_06610C_A	17243	2.7688	0.249702	11.0884	1.43e-28	6.42e-27	study5_Casamino_acid_vs_Glu
1036	C3_05360C_A	3633.03	1.20342	0.245877	4.89441	9.86e-07	6.07e-06	study5_Casamino_acid_vs_Glu
1037	C2_01040W_A	194.766	1.20438	0.271571	4.43486	9.21e-06	4.7e-05	study5_Casamino_acid_vs_Glu
1038	C1_13850C_A	90.0088	1.79205	0.405482	4.41955	9.89e-06	5.01e-05	study5_Casamino_acid_vs_Glu
1039	C5_03870C_A	2014.52	2.52161	0.195054	12.9278	3.14e-38	2.08e-36	study5_Casamino_acid_vs_Glu
1040	C1_11100W_A	1367.83	1.18198	0.205035	5.76479	8.18e-09	7.02e-08	study5_Casamino_acid_vs_Glu
1041	C3_02820C_A	1568.96	1.30737	0.169182	7.72761	1.1e-14	1.76e-13	study5_Casamino_acid_vs_Glu
1042	C2_09980W_A	7802.71	1.49751	0.370098	4.04626	5.2e-05	0.00022629	study5_Casamino_acid_vs_Glu
1043	C1_09100W_A	373.24	1.55283	0.260353	5.96433	2.46e-09	2.21e-08	study5_Casamino_acid_vs_Glu
1044	C1_07960W_A	424.797	1.1881	0.394252	3.01356	0.00258198	0.00735303	study5_Casamino_acid_vs_Glu
1045	C6_03600C_A	188.698	4.17157	0.645284	6.46471	1.01e-10	1.11e-09	study5_Casamino_acid_vs_Glu
1046	C1_13080W_A	6522.51	8.06739	0.52089	15.4877	4.2e-54	4.54e-52	study5_Casamino_acid_vs_Glu
1047	C2_01270W_A	9323.29	5.43288	0.364476	14.906	3.01e-50	2.81e-48	study5_Casamino_acid_vs_Glu
1048	CR_01310W_A	16478.1	1.39702	0.217982	6.40887	1.47e-10	1.56e-09	study5_Casamino_acid_vs_Glu
1049	C3_04440C_A	55.6888	2.05051	0.461252	4.44554	8.77e-06	4.49e-05	study5_Casamino_acid_vs_Glu
1050	C6_02790C_A	1224.92	2.53925	0.326172	7.78499	6.97e-15	1.15e-13	study5_Casamino_acid_vs_Glu
1051	C1_02500W_A	563.154	1.0235	0.178081	5.74736	9.06e-09	7.72e-08	study5_Casamino_acid_vs_Glu
1052	CR_01280C_A	965.42	1.48221	0.21594	6.86396	6.7e-12	8.26e-11	study5_Casamino_acid_vs_Glu
1053	C1_10550C_A	715.039	1.88652	0.266606	7.07607	1.48e-12	1.94e-11	study5_Casamino_acid_vs_Glu
1054	C1_11320C_A	23793.7	9.03287	0.544949	16.5756	1.05e-61	1.5e-59	study5_Casamino_acid_vs_Glu
1055	C7_00280W_A	1253.09	6.77795	0.563059	12.0377	2.25e-33	1.25e-31	study5_Casamino_acid_vs_Glu
1056	C5_04960W_A	4842.91	2.581	0.223866	11.5292	9.4e-31	4.67e-29	study5_Casamino_acid_vs_Glu
1057	C2_04650C_A	1579.4	1.11623	0.239976	4.65143	3.3e-06	1.85e-05	study5_Casamino_acid_vs_Glu
1058	C3_03760W_A	3179.53	1.78581	0.280545	6.36552	1.95e-10	2.06e-09	study5_Casamino_acid_vs_Glu
1059	C5_04870W_A	971.256	1.0668	0.225172	4.73773	2.16e-06	1.26e-05	study5_Casamino_acid_vs_Glu
1060	C6_01260W_A	195.692	1.54351	0.343875	4.48858	7.17e-06	3.73e-05	study5_Casamino_acid_vs_Glu
1061	CR_03580C_A	503.503	3.08685	0.470127	6.56601	5.17e-11	5.85e-10	study5_Casamino_acid_vs_Glu
1062	CR_09740W_A	1112.19	1.16773	0.314755	3.70996	0.000207288	0.000780118	study5_Casamino_acid_vs_Glu
1063	C2_06990W_A	1153.35	4.97467	0.296046	16.8037	2.29e-63	3.62e-61	study5_Casamino_acid_vs_Glu
1064	CR_09500C_A	1120.52	1.44113	0.191951	7.50777	6.01e-14	8.94e-13	study5_Casamino_acid_vs_Glu
1065	C2_10650W_A	473.939	1.98334	0.308625	6.42639	1.31e-10	1.4e-09	study5_Casamino_acid_vs_Glu
1066	C2_05130W_A	1431.12	2.52822	0.313371	8.06783	7.16e-16	1.32e-14	study5_Casamino_acid_vs_Glu
1067	C6_01440C_A	77.9748	4.81594	0.605381	7.95523	1.79e-15	3.12e-14	study5_Casamino_acid_vs_Glu
1068	C2_10350C_A	19709.3	3.37193	0.289343	11.6538	2.2e-31	1.11e-29	study5_Casamino_acid_vs_Glu
1069	CR_01220W_A	14.9835	4.16573	0.902766	4.61441	3.94e-06	2.18e-05	study5_Casamino_acid_vs_Glu
1070	C5_05390C_A	7709.49	1.32254	0.30803	4.29354	1.76e-05	8.52e-05	study5_Casamino_acid_vs_Glu
1071	C4_02220C_A	239.355	4.13639	0.504318	8.20195	2.37e-16	4.48e-15	study5_Casamino_acid_vs_Glu
1072	C1_09060C_A	1239.16	1.10913	0.21467	5.16668	2.38e-07	1.61e-06	study5_Casamino_acid_vs_Glu
1073	C6_01740C_A	2521.5	1.52025	0.207799	7.31594	2.56e-13	3.58e-12	study5_Casamino_acid_vs_Glu
1074	CR_00540C_A	30099.8	4.07046	0.178679	22.7808	7.1e-115	4.86e-112	study5_Casamino_acid_vs_Glu
1075	CR_06870C_A	86.0757	5.60299	0.553977	10.1141	4.78e-24	1.64e-22	study5_Casamino_acid_vs_Glu
1076	C2_01690W_A	7567.66	1.46299	0.207936	7.03577	1.98e-12	2.57e-11	study5_Casamino_acid_vs_Glu
1077	CR_02920C_A	2897.94	4.05508	0.530425	7.64498	2.09e-14	3.26e-13	study5_Casamino_acid_vs_Glu
1078	C6_01450C_A	3437.1	5.75269	0.276133	20.8331	2.17e-96	7.86e-94	study5_Casamino_acid_vs_Glu
1079	C1_02150W_A	7427.32	2.61961	0.504937	5.188	2.13e-07	1.45e-06	study5_Casamino_acid_vs_Glu
1080	C2_05440W_A	1522.16	1.14855	0.254818	4.50735	6.56e-06	3.44e-05	study5_Casamino_acid_vs_Glu
1081	C1_13160W_A	3264.29	1.82497	0.440283	4.14499	3.4e-05	0.000154071	study5_Casamino_acid_vs_Glu
1082	C7_02010C_A	238.626	3.6556	0.338829	10.7889	3.88e-27	1.63e-25	study5_Casamino_acid_vs_Glu
1083	C3_04020C_A	1951.94	1.45289	0.230361	6.30699	2.85e-10	2.93e-09	study5_Casamino_acid_vs_Glu
1084	C2_04180C_A	1027.21	1.18459	0.157465	7.52287	5.36e-14	8.03e-13	study5_Casamino_acid_vs_Glu
1085	C5_02920W_A	1586.1	1.07695	0.234522	4.59212	4.39e-06	2.39e-05	study5_Casamino_acid_vs_Glu
1086	C3_01170W_A	1950.05	1.08489	0.211856	5.12088	3.04e-07	2.03e-06	study5_Casamino_acid_vs_Glu
1087	CR_06930W_A	1453.65	1.30621	0.198343	6.58561	4.53e-11	5.15e-10	study5_Casamino_acid_vs_Glu
1088	C2_09830C_A	2558.23	1.55451	0.248136	6.26473	3.73e-10	3.79e-09	study5_Casamino_acid_vs_Glu
1089	C1_05160C_A	16852	3.68444	0.381523	9.6572	4.58e-22	1.32e-20	study5_Casamino_acid_vs_Glu
1090	CR_01620C_A	50545.4	1.33154	0.318333	4.18286	2.88e-05	0.000133361	study5_Casamino_acid_vs_Glu
1091	C6_03770C_A	2238.02	1.68629	0.196826	8.56742	1.06e-17	2.22e-16	study5_Casamino_acid_vs_Glu
1092	C7_02920W_A	1036.19	3.01737	0.354778	8.50497	1.82e-17	3.73e-16	study5_Casamino_acid_vs_Glu
1093	C6_03260W_A	5367.43	2.20946	0.398018	5.55116	2.84e-08	2.22e-07	study5_Casamino_acid_vs_Glu
1094	C2_05820W_A	849.928	1.27611	0.405129	3.1499	0.00163327	0.0049006	study5_Casamino_acid_vs_Glu
1095	C2_00150W_A	1365.44	1.37531	0.163169	8.42876	3.49e-17	6.98e-16	study5_Casamino_acid_vs_Glu
1096	C2_04660C_A	4372.97	2.26553	0.241329	9.38774	6.13e-21	1.65e-19	study5_Casamino_acid_vs_Glu
1097	C7_00630C_A	89.1037	2.55044	0.430346	5.92648	3.09e-09	2.76e-08	study5_Casamino_acid_vs_Glu
1098	C1_01710W_A	5607.3	2.27554	0.288383	7.89068	3.01e-15	5.1e-14	study5_Casamino_acid_vs_Glu
1099	C2_02310W_A	3954.54	1.85753	0.167156	11.1125	1.09e-28	4.94e-27	study5_Casamino_acid_vs_Glu
1100	C6_02340W_A	12696.8	1.00077	0.247315	4.04653	5.2e-05	0.000226185	study5_Casamino_acid_vs_Glu
1101	CR_06080W_A	8462.44	1.54534	0.414182	3.73106	0.000190674	0.000723338	study5_Casamino_acid_vs_Glu
1102	C3_02810C_A	1134.29	2.43877	0.306011	7.96956	1.59e-15	2.8e-14	study5_Casamino_acid_vs_Glu
1103	C3_02190C_A	3400.66	1.62606	0.195197	8.33034	8.06e-17	1.59e-15	study5_Casamino_acid_vs_Glu
1104	CR_08710W_A	5964.69	1.23745	0.179567	6.89127	5.53e-12	6.88e-11	study5_Casamino_acid_vs_Glu
1105	C2_07900W_A	60346	4.84022	0.327128	14.7961	1.55e-49	1.38e-47	study5_Casamino_acid_vs_Glu
1106	C2_00180C_A	1189.24	1.38016	0.171344	8.05489	7.95e-16	1.46e-14	study5_Casamino_acid_vs_Glu
1107	C2_05770W_A	850.976	2.10594	0.249888	8.42753	3.53e-17	7.03e-16	study5_Casamino_acid_vs_Glu
1108	C3_05050W_A	3750.38	9.83847	0.466171	21.1048	7.18e-99	3.16e-96	study5_Casamino_acid_vs_Glu
1109	C2_02390W_A	2281.32	1.97353	0.376073	5.24773	1.54e-07	1.08e-06	study5_Casamino_acid_vs_Glu
1110	C1_12720C_A	40.6215	1.40903	0.510356	2.76088	0.00576451	0.0149441	study5_Casamino_acid_vs_Glu
1111	C1_09030C_A	7992.54	1.26481	0.221519	5.70974	1.13e-08	9.39e-08	study5_Casamino_acid_vs_Glu
1112	C5_03710C_A	299.806	1.49849	0.214871	6.9739	3.08e-12	3.9e-11	study5_Casamino_acid_vs_Glu
1113	CR_09200C_A	928.457	1.21319	0.192263	6.31005	2.79e-10	2.88e-09	study5_Casamino_acid_vs_Glu
1114	C3_06940W_A	2976.07	1.50774	0.194739	7.74237	9.76e-15	1.58e-13	study5_Casamino_acid_vs_Glu
1115	C1_13180W_A	62.7826	2.81552	0.444088	6.34001	2.3e-10	2.41e-09	study5_Casamino_acid_vs_Glu
1116	C3_00400C_A	1471.6	1.50048	0.233021	6.43923	1.2e-10	1.3e-09	study5_Casamino_acid_vs_Glu
1117	CR_05180C_A	7252.58	2.93991	0.191622	15.3423	3.99e-53	4.16e-51	study5_Casamino_acid_vs_Glu
1118	C6_01490C_A	2772.55	5.60778	0.335237	16.7278	8.23e-63	1.24e-60	study5_Casamino_acid_vs_Glu
1119	C7_00080C_A	2352.3	1.05477	0.264971	3.98069	6.87e-05	0.00029118	study5_Casamino_acid_vs_Glu
1120	C1_12730W_A	1573.54	1.00398	0.229627	4.37224	1.23e-05	6.12e-05	study5_Casamino_acid_vs_Glu
1121	C2_10110W_A	4145.33	1.68836	0.361815	4.66638	3.07e-06	1.73e-05	study5_Casamino_acid_vs_Glu
1122	C4_03820C_A	912.441	3.102	0.339106	9.14759	5.82e-20	1.46e-18	study5_Casamino_acid_vs_Glu
1123	C4_00160C_A	29493.2	3.75442	0.196157	19.1398	1.18e-81	3.02e-79	study5_Casamino_acid_vs_Glu
1124	C5_00930C_A	11559.1	1.1627	0.242391	4.79679	1.61e-06	9.62e-06	study5_Casamino_acid_vs_Glu
1125	C3_01890C_A	5975.58	1.1414	0.191865	5.94898	2.7e-09	2.42e-08	study5_Casamino_acid_vs_Glu
1126	CR_08420W_A	2787.27	2.67769	0.5036	5.31709	1.05e-07	7.63e-07	study5_Casamino_acid_vs_Glu
1127	CR_09580C_A	2864.65	1.12649	0.374402	3.00878	0.00262303	0.00745957	study5_Casamino_acid_vs_Glu
1128	C4_04970C_A	2447.36	1.38601	0.23452	5.91	3.42e-09	3.03e-08	study5_Casamino_acid_vs_Glu
1129	C6_04220C_A	3666.11	1.72446	0.240926	7.15766	8.21e-13	1.09e-11	study5_Casamino_acid_vs_Glu
1130	C6_02500C_A	6930.87	3.3449	0.229017	14.6054	2.59e-48	2.22e-46	study5_Casamino_acid_vs_Glu
1131	CR_08990C_A	9800.45	1.00409	0.378982	2.64945	0.0080624	0.0200973	study5_Casamino_acid_vs_Glu
1132	C2_06870C_A	4230.73	1.51354	0.359343	4.21197	2.53e-05	0.000119346	study5_Casamino_acid_vs_Glu
1133	C4_02330C_A	1414.95	1.52984	0.30377	5.03617	4.75e-07	3.08e-06	study5_Casamino_acid_vs_Glu
1134	C5_03150W_A	6374.3	1.06534	0.183745	5.79792	6.71e-09	5.84e-08	study5_Casamino_acid_vs_Glu
1135	C6_00620W_A	1598.25	1.79676	0.261256	6.87739	6.1e-12	7.55e-11	study5_Casamino_acid_vs_Glu
1136	C2_08950W_A	567.913	1.65094	0.316929	5.20917	1.9e-07	1.31e-06	study5_Casamino_acid_vs_Glu
1137	C1_09020W_A	4815.55	2.27155	0.227409	9.98887	1.71e-23	5.53e-22	study5_Casamino_acid_vs_Glu
1138	C4_03620C_A	1511.04	1.63161	0.231032	7.06224	1.64e-12	2.13e-11	study5_Casamino_acid_vs_Glu
1139	C2_09960W_A	941.74	2.06617	0.199111	10.377	3.16e-25	1.16e-23	study5_Casamino_acid_vs_Glu
1140	C4_00830W_A	1331.46	1.538	0.285464	5.38774	7.14e-08	5.27e-07	study5_Casamino_acid_vs_Glu
1141	C2_02970C_A	68880.1	4.44753	0.278669	15.9599	2.43e-57	2.82e-55	study5_Casamino_acid_vs_Glu
1142	C1_13880C_A	4012.23	1.85468	0.282575	6.56348	5.26e-11	5.94e-10	study5_Casamino_acid_vs_Glu
1143	C4_04530C_A	5734.37	4.58032	0.390157	11.7397	7.98e-32	4.09e-30	study5_Casamino_acid_vs_Glu
1144	CR_03850W_A	423.116	1.38826	0.214979	6.45767	1.06e-10	1.15e-09	study5_Casamino_acid_vs_Glu
1145	C4_00100C_A	1588.09	1.58073	0.252082	6.2707	3.59e-10	3.66e-09	study5_Casamino_acid_vs_Glu
1146	CR_04420C_A	439.614	1.3967	0.326311	4.28028	1.87e-05	9.02e-05	study5_Casamino_acid_vs_Glu
1147	C7_00870W_A	525.888	3.04718	0.253584	12.0164	2.91e-33	1.6e-31	study5_Casamino_acid_vs_Glu
1148	C2_00600C_A	1696.25	2.50861	0.307548	8.15681	3.44e-16	6.48e-15	study5_Casamino_acid_vs_Glu
1149	C1_09170W_A	2419.34	1.25795	0.25405	4.95159	7.36e-07	4.63e-06	study5_Casamino_acid_vs_Glu
1150	C3_01460C_A	2678.55	2.85391	0.230984	12.3555	4.55e-35	2.62e-33	study5_Casamino_acid_vs_Glu
1151	CR_05120W_A	2771.42	1.01176	0.175229	5.77393	7.74e-09	6.67e-08	study5_Casamino_acid_vs_Glu
1152	CR_03260W_A	2262.08	2.50885	0.318035	7.8886	3.06e-15	5.16e-14	study5_Casamino_acid_vs_Glu
1153	C3_04630W_A	907.763	1.87903	0.19154	9.81014	1.02e-22	3.18e-21	study5_Casamino_acid_vs_Glu
1154	CR_10420W_A	2514.16	1.75641	0.290727	6.04143	1.53e-09	1.42e-08	study5_Casamino_acid_vs_Glu
1155	C6_01170W_A	1267.33	1.23648	0.474299	2.60696	0.00913499	0.0223902	study5_Casamino_acid_vs_Glu
1156	C1_02800W_A	233.917	2.26412	0.474392	4.77267	1.82e-06	1.07e-05	study5_Casamino_acid_vs_Glu
1157	C7_02530C_A	1218.84	1.00853	0.200359	5.03362	4.81e-07	3.11e-06	study5_Casamino_acid_vs_Glu
1158	C2_02190C_A	503.645	1.17018	0.238057	4.91556	8.85e-07	5.51e-06	study5_Casamino_acid_vs_Glu
1159	CR_05610C_A	2018.69	2.2522	0.207062	10.8769	1.49e-27	6.44e-26	study5_Casamino_acid_vs_Glu
1160	C4_02660W_A	392.27	1.64354	0.257738	6.37679	1.81e-10	1.92e-09	study5_Casamino_acid_vs_Glu
1161	C1_07920W_A	1569.7	1.34165	0.228838	5.86291	4.55e-09	4e-08	study5_Casamino_acid_vs_Glu
1162	C4_03280W_A	10285.5	1.2219	0.266951	4.57725	4.71e-06	2.56e-05	study5_Casamino_acid_vs_Glu
1163	CR_05740C_A	1531.8	1.06598	0.212569	5.01476	5.31e-07	3.42e-06	study5_Casamino_acid_vs_Glu
1164	C2_05950C_A	1222.97	2.75135	0.268222	10.2577	1.09e-24	3.96e-23	study5_Casamino_acid_vs_Glu
1165	C6_02520W_A	5617.85	2.47182	0.23441	10.5449	5.37e-26	2.08e-24	study5_Casamino_acid_vs_Glu
1166	C5_00890C_A	1045.37	2.77843	0.365771	7.59611	3.05e-14	4.67e-13	study5_Casamino_acid_vs_Glu
1167	C3_04890W_A	457.797	1.11043	0.208239	5.33249	9.69e-08	7.03e-07	study5_Casamino_acid_vs_Glu
1168	C2_08300C_A	15856.5	2.82053	0.402212	7.01254	2.34e-12	3.01e-11	study5_Casamino_acid_vs_Glu
1169	C2_01620W_A	9274.89	1.02612	0.253944	4.04072	5.33e-05	0.000230722	study5_Casamino_acid_vs_Glu
1170	C1_00190C_A	1747.5	4.65019	0.386049	12.0456	2.05e-33	1.15e-31	study5_Casamino_acid_vs_Glu
1171	C2_00680C_A	417.678	2.51947	0.491065	5.13063	2.89e-07	1.93e-06	study5_Casamino_acid_vs_Glu
1172	C1_13450W_A	565.177	2.42903	0.424311	5.72464	1.04e-08	8.74e-08	study5_Casamino_acid_vs_Glu
1173	C5_04470C_A	9122.31	1.59246	0.339247	4.69411	2.68e-06	1.53e-05	study5_Casamino_acid_vs_Glu
1174	CR_00110W_A	1524.1	1.04275	0.259474	4.0187	5.85e-05	0.000250567	study5_Casamino_acid_vs_Glu
1175	C3_02930W_A	97.6308	1.37832	0.278953	4.94104	7.77e-07	4.88e-06	study5_Casamino_acid_vs_Glu
1176	C2_01210C_A	3138.17	2.06064	0.297557	6.92518	4.35e-12	5.46e-11	study5_Casamino_acid_vs_Glu
1177	C1_03120W_A	3382.8	1.47349	0.201926	7.2972	2.94e-13	4.1e-12	study5_Casamino_acid_vs_Glu
1178	C7_00730W_A	5957.99	1.06912	0.194325	5.50172	3.76e-08	2.89e-07	study5_Casamino_acid_vs_Glu
1179	C4_03400W_A	2237.75	1.13624	0.211948	5.36091	8.28e-08	6.08e-07	study5_Casamino_acid_vs_Glu
1180	CR_05220C_A	761.707	1.03252	0.315113	3.27667	0.00105038	0.00331821	study5_Casamino_acid_vs_Glu
1181	C2_07550W_A	7521.29	1.46686	0.19451	7.54133	4.65e-14	7.02e-13	study5_Casamino_acid_vs_Glu
1182	C3_00870W_A	6.00899	3.73927	1.41849	2.63609	0.00838678	0.0207964	study5_Casamino_acid_vs_Glu
1183	C2_00940W_A	1790.88	1.8102	0.39478	4.58535	4.53e-06	2.47e-05	study5_Casamino_acid_vs_Glu
1184	CR_09030C_A	395.166	1.22594	0.213164	5.75117	8.86e-09	7.56e-08	study5_Casamino_acid_vs_Glu
1185	C5_03800W_A	1205.25	1.06375	0.213453	4.98351	6.24e-07	3.99e-06	study5_Casamino_acid_vs_Glu
1186	CR_06500C_A	2004.34	1.88571	0.383557	4.91636	8.82e-07	5.49e-06	study5_Casamino_acid_vs_Glu
1187	C2_08290C_A	86170.3	2.44266	0.40686	6.00368	1.93e-09	1.76e-08	study5_Casamino_acid_vs_Glu
1188	C7_01780W_A	9033.83	2.01518	0.28825	6.99107	2.73e-12	3.49e-11	study5_Casamino_acid_vs_Glu
1189	C4_06620C_A	275.361	4.29484	0.425532	10.0929	5.94e-24	2e-22	study5_Casamino_acid_vs_Glu
1190	C1_13100W_A	1367.29	7.32366	1.05901	6.91555	4.66e-12	5.83e-11	study5_Casamino_acid_vs_Glu
1191	C5_01450W_A	843.435	1.16378	0.259904	4.47772	7.54e-06	3.9e-05	study5_Casamino_acid_vs_Glu
1192	C2_04850C_A	5898.01	1.13001	0.229941	4.91435	8.91e-07	5.53e-06	study5_Casamino_acid_vs_Glu
1193	C3_05250C_A	1965.84	1.3182	0.250481	5.26268	1.42e-07	1e-06	study5_Casamino_acid_vs_Glu
1194	C1_01620C_A	927.895	4.00642	0.438199	9.14292	6.08e-20	1.52e-18	study5_Casamino_acid_vs_Glu
1195	C6_03760C_A	22520.6	1.59039	0.317258	5.01293	5.36e-07	3.45e-06	study5_Casamino_acid_vs_Glu
1196	C3_04430W_A	11792.4	2.18257	0.275056	7.93499	2.11e-15	3.63e-14	study5_Casamino_acid_vs_Glu
1197	C5_03350W_A	9289.65	1.58486	0.277419	5.71285	1.11e-08	9.25e-08	study5_Casamino_acid_vs_Glu
1198	C3_01400W_A	1803.62	1.10956	0.17492	6.34323	2.25e-10	2.36e-09	study5_Casamino_acid_vs_Glu
1199	CR_02270C_A	568.445	2.14981	0.543349	3.95659	7.6e-05	0.00031736	study5_Casamino_acid_vs_Glu
1200	C6_00930C_A	3837.13	3.77057	0.294202	12.8162	1.33e-37	8.44e-36	study5_Casamino_acid_vs_Glu
1201	C1_07120W_A	8143.13	1.00676	0.241553	4.16785	3.07e-05	0.000141285	study5_Casamino_acid_vs_Glu
1202	C5_04480C_A	58.3709	3.35766	0.588309	5.70731	1.15e-08	9.51e-08	study5_Casamino_acid_vs_Glu
1203	C2_05760C_A	3973.74	1.40245	0.159426	8.79684	1.41e-18	3.2e-17	study5_Casamino_acid_vs_Glu
1204	C3_05980C_A	2415.26	2.50791	0.322737	7.77074	7.8e-15	1.28e-13	study5_Casamino_acid_vs_Glu
1205	C1_02490C_A	1488.29	1.16848	0.271629	4.30177	1.69e-05	8.26e-05	study5_Casamino_acid_vs_Glu
1206	C5_03670C_A	556.085	1.45552	0.173175	8.40492	4.28e-17	8.5e-16	study5_Casamino_acid_vs_Glu
1207	C5_03240W_A	4635.74	1.61973	0.269253	6.01564	1.79e-09	1.65e-08	study5_Casamino_acid_vs_Glu
1208	C2_05920C_A	12007.2	1.12758	0.230418	4.89362	9.9e-07	6.09e-06	study5_Casamino_acid_vs_Glu
1209	C2_08330W_A	2528.76	3.38463	0.378347	8.94584	3.69e-19	8.81e-18	study5_Casamino_acid_vs_Glu
1210	C3_01250W_A	5287.13	1.93145	0.242198	7.97466	1.53e-15	2.71e-14	study5_Casamino_acid_vs_Glu
1211	CR_02350C_A	2728.44	2.15742	0.271419	7.94864	1.89e-15	3.27e-14	study5_Casamino_acid_vs_Glu
1212	C5_00670C_A	7344.1	1.55697	0.377862	4.12048	3.78e-05	0.000169301	study5_Casamino_acid_vs_Glu
1213	C1_14300C_A	3542.16	1.01022	0.298792	3.381	0.000722217	0.00238941	study5_Casamino_acid_vs_Glu
1214	C1_06230C_A	13957.9	4.02492	0.339556	11.8535	2.06e-32	1.09e-30	study5_Casamino_acid_vs_Glu
1215	C7_01700W_A	3063.04	1.57127	0.217075	7.23838	4.54e-13	6.24e-12	study5_Casamino_acid_vs_Glu
1216	C3_02400C_A	5709.94	1.09126	0.192857	5.6584	1.53e-08	1.24e-07	study5_Casamino_acid_vs_Glu
1217	CR_07730W_A	494.711	1.31694	0.22212	5.92894	3.05e-09	2.72e-08	study5_Casamino_acid_vs_Glu
1218	C3_05410W_A	3622.19	1.23125	0.219106	5.61942	1.92e-08	1.53e-07	study5_Casamino_acid_vs_Glu
1219	C1_05770C_A	1750.69	1.2695	0.298991	4.24594	2.18e-05	0.000104136	study5_Casamino_acid_vs_Glu
1220	CR_09690C_A	3376.1	1.59142	0.179788	8.85167	8.62e-19	2e-17	study5_Casamino_acid_vs_Glu
1221	C6_02780C_A	2454.84	1.53088	0.224372	6.82295	8.92e-12	1.08e-10	study5_Casamino_acid_vs_Glu
1222	C7_01440W_A	303.517	1.32816	0.292422	4.54192	5.57e-06	2.97e-05	study5_Casamino_acid_vs_Glu
1223	CR_02360W_A	22842.7	6.34265	0.281786	22.5088	3.4e-112	1.91e-109	study5_Casamino_acid_vs_Glu
1224	C5_03880C_A	49.6225	1.40241	0.570066	2.46009	0.0138902	0.032236	study5_Casamino_acid_vs_Glu
1225	C2_06680W_A	14791.6	5.25338	0.245869	21.3666	2.73e-101	1.4e-98	study5_Casamino_acid_vs_Glu
1226	C7_00060C_A	1916.63	1.3096	0.226214	5.7892	7.07e-09	6.13e-08	study5_Casamino_acid_vs_Glu
1227	C6_02890C_A	3118.48	7.3935	0.316427	23.3656	9.57e-121	7.37e-118	study5_Casamino_acid_vs_Glu
1228	C7_02240W_A	745.123	4.12134	0.4464	9.23239	2.65e-20	6.82e-19	study5_Casamino_acid_vs_Glu
1229	C1_10310W_A	544.89	1.17935	0.211427	5.57806	2.43e-08	1.92e-07	study5_Casamino_acid_vs_Glu
1230	C1_11680C_A	2079.69	2.75843	0.303357	9.093	9.63e-20	2.36e-18	study5_Casamino_acid_vs_Glu
1231	C4_02540W_A	2804.73	2.31941	0.285394	8.12706	4.4e-16	8.18e-15	study5_Casamino_acid_vs_Glu
1232	C1_03270W_A	629.466	1.5164	0.339996	4.46006	8.19e-06	4.21e-05	study5_Casamino_acid_vs_Glu
1233	C1_02130C_A	7066.42	2.26952	0.484467	4.68458	2.81e-06	1.6e-05	study5_Casamino_acid_vs_Glu
1234	C4_02030W_A	526.828	1.15723	0.285122	4.05872	4.93e-05	0.00021592	study5_Casamino_acid_vs_Glu
1235	C4_01320C_A	1060.54	1.56145	0.220329	7.08688	1.37e-12	1.81e-11	study5_Casamino_acid_vs_Glu
1236	C4_04140W_A	839.331	1.73081	0.223116	7.75746	8.66e-15	1.41e-13	study5_Casamino_acid_vs_Glu
1237	C1_02520W_A	599.974	5.77666	0.592672	9.74681	1.9e-22	5.72e-21	study5_Casamino_acid_vs_Glu
1238	CR_07620W_A	13591.1	1.39711	0.297399	4.69774	2.63e-06	1.51e-05	study5_Casamino_acid_vs_Glu
1239	C3_05450C_A	1856.7	1.94877	0.310663	6.27295	3.54e-10	3.62e-09	study5_Casamino_acid_vs_Glu
1240	CR_09560C_A	401.427	1.2641	0.219314	5.76386	8.22e-09	7.05e-08	study5_Casamino_acid_vs_Glu
1241	C5_02110W_A	2369.05	2.2198	0.385374	5.76012	8.41e-09	7.2e-08	study5_Casamino_acid_vs_Glu
1242	C3_01060W_A	147.045	3.84334	0.491632	7.81753	5.39e-15	8.92e-14	study5_Casamino_acid_vs_Glu
1243	CR_07770C_A	1249.42	1.28521	0.228193	5.63209	1.78e-08	1.43e-07	study5_Casamino_acid_vs_Glu
1244	C2_04090W_A	24.0678	1.56651	0.562165	2.78656	0.00532709	0.0140047	study5_Casamino_acid_vs_Glu
1245	C1_08400C_A	15876	3.89557	0.373826	10.4208	1.99e-25	7.43e-24	study5_Casamino_acid_vs_Glu
1246	C6_01070C_A	882.766	3.38483	0.440964	7.67598	1.64e-14	2.58e-13	study5_Casamino_acid_vs_Glu
1247	C5_01250W_A	1828.65	1.62088	0.231992	6.9868	2.81e-12	3.59e-11	study5_Casamino_acid_vs_Glu
1248	CR_02880W_A	500.559	1.01586	0.240939	4.21624	2.48e-05	0.000117468	study5_Casamino_acid_vs_Glu
1249	C1_01520C_A	7274.01	1.73444	0.204801	8.46892	2.48e-17	5.03e-16	study5_Casamino_acid_vs_Glu
1250	C1_14190C_A	1021.65	2.39102	0.450249	5.31045	1.09e-07	7.89e-07	study5_Casamino_acid_vs_Glu
1251	C3_00460W_A	14035.5	1.33094	0.184557	7.21154	5.53e-13	7.54e-12	study5_Casamino_acid_vs_Glu
1252	C2_03490C_A	2068.69	1.32321	0.189678	6.97608	3.04e-12	3.85e-11	study5_Casamino_acid_vs_Glu
1253	C5_00510W_A	147.165	2.41886	0.304974	7.93136	2.17e-15	3.72e-14	study5_Casamino_acid_vs_Glu
1254	C2_04960C_A	1242.16	1.33046	0.180924	7.3537	1.93e-13	2.73e-12	study5_Casamino_acid_vs_Glu
1255	C2_08830W_A	2936.98	1.16308	0.275624	4.21979	2.45e-05	0.000115845	study5_Casamino_acid_vs_Glu
1256	C1_02180W_A	6172.11	2.35249	0.432575	5.43834	5.38e-08	4.03e-07	study5_Casamino_acid_vs_Glu
1257	C1_11950W_A	523.653	3.68411	0.226436	16.27	1.61e-59	2.16e-57	study5_Casamino_acid_vs_Glu
1258	C2_05930W_A	7039.83	1.19408	0.226035	5.28273	1.27e-07	9.09e-07	study5_Casamino_acid_vs_Glu
1259	C3_07830W_A	1822.32	2.70561	0.265637	10.1854	2.31e-24	8.16e-23	study5_Casamino_acid_vs_Glu
1260	C1_14340C_A	21046.9	2.78089	0.246423	11.285	1.56e-29	7.32e-28	study5_Casamino_acid_vs_Glu
1261	C2_04760W_A	3330.11	1.16346	0.212921	5.46428	4.65e-08	3.51e-07	study5_Casamino_acid_vs_Glu
1262	C4_01930C_A	585.983	2.08176	0.311104	6.69153	2.21e-11	2.58e-10	study5_Casamino_acid_vs_Glu
1263	C7_04310C_A	2181.37	2.23105	0.270163	8.25817	1.48e-16	2.85e-15	study5_Casamino_acid_vs_Glu
1264	C6_04620C_A	16.588	3.52578	0.791782	4.45297	8.47e-06	4.34e-05	study5_Casamino_acid_vs_Glu
1265	C4_02290W_A	4704.4	1.3516	0.280121	4.82505	1.4e-06	8.44e-06	study5_Casamino_acid_vs_Glu
1266	CR_03530W_A	12104.9	1.12713	0.15458	7.29157	3.06e-13	4.27e-12	study5_Casamino_acid_vs_Glu
1267	C3_04920C_A	4252.11	2.11429	0.258755	8.17101	3.06e-16	5.78e-15	study5_Casamino_acid_vs_Glu
1268	C4_00560C_A	1033.77	1.11229	0.232392	4.78627	1.7e-06	1.01e-05	study5_Casamino_acid_vs_Glu
1269	C2_00250W_A	34525.9	2.56386	0.391658	6.54617	5.9e-11	6.61e-10	study5_Casamino_acid_vs_Glu
1270	C6_00330C_A	16196.7	2.53801	0.418704	6.06158	1.35e-09	1.26e-08	study5_Casamino_acid_vs_Glu
1271	C7_01500W_A	522.859	1.06382	0.210866	5.04499	4.54e-07	2.95e-06	study5_Casamino_acid_vs_Glu
1272	C7_02220C_A	1214.37	2.23331	0.299325	7.46116	8.58e-14	1.26e-12	study5_Casamino_acid_vs_Glu
1273	C7_01760C_A	5104.96	1.58868	0.22643	7.01622	2.28e-12	2.94e-11	study5_Casamino_acid_vs_Glu
1274	C1_01490W_A	14828.9	3.00759	0.241627	12.4472	1.45e-35	8.57e-34	study5_Casamino_acid_vs_Glu
1275	C6_00280W_A	16172.8	1.55307	0.270525	5.74094	9.41e-09	8e-08	study5_Casamino_acid_vs_Glu
1276	C1_09850C_A	6105.03	1.03232	0.220875	4.6738	2.96e-06	1.68e-05	study5_Casamino_acid_vs_Glu
1277	C2_05180W_A	8412.07	3.66282	0.552336	6.63151	3.32e-11	3.8e-10	study5_Casamino_acid_vs_Glu
1278	C2_03840C_A	1266.06	1.24445	0.162414	7.66221	1.83e-14	2.86e-13	study5_Casamino_acid_vs_Glu
1279	CR_00220W_A	753.241	1.66128	0.216161	7.6854	1.53e-14	2.42e-13	study5_Casamino_acid_vs_Glu
1280	CR_00290W_A	5117.58	2.18505	0.322438	6.77665	1.23e-11	1.48e-10	study5_Casamino_acid_vs_Glu
1281	C4_03460C_A	103.135	1.51304	0.30956	4.8877	1.02e-06	6.26e-06	study5_Casamino_acid_vs_Glu
1282	C4_01400W_A	219.407	1.17895	0.351501	3.35404	0.000796415	0.00260549	study5_Casamino_acid_vs_Glu
1283	C5_02190C_A	3625.18	1.44558	0.16832	8.5883	8.83e-18	1.88e-16	study5_Casamino_acid_vs_Glu
1284	C7_02500C_A	1013.03	1.26609	0.24981	5.06823	4.02e-07	2.64e-06	study5_Casamino_acid_vs_Glu
1285	C2_10340W_A	832.82	1.42922	0.221206	6.46102	1.04e-10	1.13e-09	study5_Casamino_acid_vs_Glu
1286	C1_10180C_A	3146.22	1.76831	0.291661	6.06289	1.34e-09	1.25e-08	study5_Casamino_acid_vs_Glu
1287	C2_01450C_A	666.877	5.91498	0.35503	16.6605	2.54e-62	3.72e-60	study5_Casamino_acid_vs_Glu
1288	CR_08890C_A	6267.28	1.63173	0.392881	4.15324	3.28e-05	0.000149063	study5_Casamino_acid_vs_Glu
1289	CR_10320W_A	392.681	7.29305	1.47296	4.95129	7.37e-07	4.64e-06	study5_Casamino_acid_vs_Glu
1290	C5_04970C_A	311.169	1.09079	0.218774	4.98591	6.17e-07	3.95e-06	study5_Casamino_acid_vs_Glu
1291	C6_01060C_A	2722.27	3.1218	0.416515	7.49505	6.63e-14	9.81e-13	study5_Casamino_acid_vs_Glu
1292	C6_02020C_A	1754.26	1.37058	0.252169	5.43514	5.48e-08	4.1e-07	study5_Casamino_acid_vs_Glu
1293	C1_01740W_A	1131.29	5.02369	0.468575	10.7212	8.09e-27	3.34e-25	study5_Casamino_acid_vs_Glu
1294	C5_00600C_A	16.1772	1.93565	0.752036	2.57388	0.0100566	0.0244159	study5_Casamino_acid_vs_Glu
1295	C3_01300C_A	288.979	1.5901	0.464938	3.42003	0.000626149	0.00209864	study5_Casamino_acid_vs_Glu
1296	C7_03330C_A	10021.9	2.1153	0.226227	9.35035	8.74e-21	2.3e-19	study5_Casamino_acid_vs_Glu
1297	CR_00920W_A	167.921	1.27769	0.257834	4.95547	7.22e-07	4.56e-06	study5_Casamino_acid_vs_Glu
1298	C2_06880C_A	2699.67	1.09272	0.310338	3.52107	0.000429804	0.00149256	study5_Casamino_acid_vs_Glu
1299	C7_03560W_A	12260	7.6684	0.448068	17.1144	1.16e-65	1.98e-63	study5_Casamino_acid_vs_Glu
1300	CR_03120W_A	2160.8	1.53347	0.251458	6.0983	1.07e-09	1.02e-08	study5_Casamino_acid_vs_Glu
1301	C6_01430C_A	2070.98	1.33257	0.294493	4.52497	6.04e-06	3.19e-05	study5_Casamino_acid_vs_Glu
1302	CR_06940W_A	866.455	1.01059	0.214775	4.70534	2.53e-06	1.46e-05	study5_Casamino_acid_vs_Glu
1303	C1_02650W_A	3853.79	1.46243	0.207055	7.06303	1.63e-12	2.13e-11	study5_Casamino_acid_vs_Glu
1304	CR_04790W_A	1691.22	2.20344	0.178024	12.3772	3.47e-35	2.02e-33	study5_Casamino_acid_vs_Glu
1305	CR_09600C_A	11453.2	1.0368	0.30932	3.35188	0.000802647	0.00262309	study5_Casamino_acid_vs_Glu
1306	C5_04980W_A	135.944	1.69521	0.300494	5.64141	1.69e-08	1.36e-07	study5_Casamino_acid_vs_Glu
1307	CR_03450W_A	665.271	2.7971	0.495669	5.64308	1.67e-08	1.35e-07	study5_Casamino_acid_vs_Glu
1308	CR_06460W_A	377.059	1.23824	0.405304	3.05509	0.00224993	0.00651592	study5_Casamino_acid_vs_Glu
1309	CR_05750W_A	3576.93	1.45306	0.301358	4.82169	1.42e-06	8.57e-06	study5_Casamino_acid_vs_Glu
1310	C1_05340C_A	2048.43	1.55942	0.217971	7.15424	8.41e-13	1.12e-11	study5_Casamino_acid_vs_Glu
1311	C6_00590W_A	2127.99	1.16305	0.283817	4.09788	4.17e-05	0.000184819	study5_Casamino_acid_vs_Glu
1312	C2_10480W_A	2382.88	1.14244	0.211334	5.40585	6.45e-08	4.8e-07	study5_Casamino_acid_vs_Glu
1313	C2_08620W_A	1419.08	1.44814	0.158654	9.12765	7e-20	1.73e-18	study5_Casamino_acid_vs_Glu
1314	CR_05920C_A	5945.06	1.60966	0.289712	5.55609	2.76e-08	2.16e-07	study5_Casamino_acid_vs_Glu
1315	C4_05130C_A	3016.97	5.4397	0.193553	28.1044	8.65e-174	1.78e-170	study5_Casamino_acid_vs_Glu
1316	C1_02730W_A	290.653	1.0074	0.274042	3.67608	0.000236844	0.00088325	study5_Casamino_acid_vs_Glu
1317	C3_03580C_A	1304.45	6.13957	0.339719	18.0725	5.25e-73	1.08e-70	study5_Casamino_acid_vs_Glu
1318	C1_10580C_A	616.72	1.76013	0.414585	4.24553	2.18e-05	0.000104247	study5_Casamino_acid_vs_Glu
1319	C1_00700W_A	2203.11	2.00583	0.202609	9.89998	4.16e-23	1.32e-21	study5_Casamino_acid_vs_Glu
1320	C3_05580C_A	7049.74	6.84174	0.427777	15.9937	1.41e-57	1.71e-55	study5_Casamino_acid_vs_Glu
1321	C2_05990C_A	1666.45	5.07602	0.284874	17.8184	5.08e-71	9.78e-69	study5_Casamino_acid_vs_Glu
1322	C1_05440C_A	711.488	1.70023	0.420864	4.03986	5.35e-05	0.000231332	study5_Casamino_acid_vs_Glu
1323	CR_06510W_A	2288.31	2.13367	0.33794	6.31374	2.72e-10	2.81e-09	study5_Casamino_acid_vs_Glu
1324	C4_05150W_A	7662.41	1.06858	0.269123	3.97059	7.17e-05	0.000301729	study5_Casamino_acid_vs_Glu
1325	C1_10170W_A	82.6986	3.67502	0.538851	6.82011	9.1e-12	1.1e-10	study5_Casamino_acid_vs_Glu
1326	C4_00270W_A	50450.7	1.14623	0.254677	4.50074	6.77e-06	3.54e-05	study5_Casamino_acid_vs_Glu
1327	C7_03760W_A	1504.33	1.09883	0.217786	5.04548	4.52e-07	2.94e-06	study5_Casamino_acid_vs_Glu
1328	CR_00360C_A	7537.23	1.70381	0.297714	5.72298	1.05e-08	8.82e-08	study5_Casamino_acid_vs_Glu
1329	C2_08640C_A	1706.74	1.73208	0.240837	7.1919	6.39e-13	8.63e-12	study5_Casamino_acid_vs_Glu
1330	C1_02670C_A	18.265	1.44999	0.62957	2.30314	0.0212709	0.04664	study5_Casamino_acid_vs_Glu
1331	C5_03270W_A	56.0099	1.60126	0.514547	3.11197	0.00185842	0.00549581	study5_Casamino_acid_vs_Glu
1332	C1_10520W_A	345.254	1.23738	0.255341	4.84599	1.26e-06	7.66e-06	study5_Casamino_acid_vs_Glu
1333	C5_02000C_A	14623.7	1.43405	0.209084	6.85873	6.95e-12	8.54e-11	study5_Casamino_acid_vs_Glu
1334	CR_08850W_A	386.034	7.26077	0.562924	12.8983	4.6e-38	2.98e-36	study5_Casamino_acid_vs_Glu
1335	C3_01080W_A	769.679	1.0947	0.222011	4.93085	8.19e-07	5.12e-06	study5_Casamino_acid_vs_Glu
1336	C1_13920W_A	4207.58	1.0028	0.192547	5.20806	1.91e-07	1.32e-06	study5_Casamino_acid_vs_Glu
1337	C1_11240C_A	3317.88	1.64814	0.266451	6.18555	6.19e-10	6.14e-09	study5_Casamino_acid_vs_Glu
1338	CR_08860W_A	3902.65	3.02229	0.341717	8.84442	9.2e-19	2.13e-17	study5_Casamino_acid_vs_Glu
1339	CR_06120W_A	2073.21	1.20238	0.335779	3.58085	0.000342472	0.00122787	study5_Casamino_acid_vs_Glu
1340	CR_03730C_A	1296.08	1.03265	0.294665	3.5045	0.00045747	0.00158061	study5_Casamino_acid_vs_Glu
1341	CR_06650C_A	1031.68	1.90375	0.285275	6.67338	2.5e-11	2.9e-10	study5_Casamino_acid_vs_Glu
1342	C1_12140W_A	1715.27	1.53747	0.329395	4.66754	3.05e-06	1.72e-05	study5_Casamino_acid_vs_Glu
1343	C6_03810W_A	1100.12	1.1819	0.225702	5.23655	1.64e-07	1.14e-06	study5_Casamino_acid_vs_Glu
1344	C7_00090C_A	1287.95	1.35781	0.230454	5.8919	3.82e-09	3.36e-08	study5_Casamino_acid_vs_Glu
1345	C5_02360C_A	142.011	1.24471	0.325978	3.81838	0.00013433	0.000531535	study5_Casamino_acid_vs_Glu
1346	C4_02190C_A	144.355	1.53624	0.407824	3.76691	0.000165278	0.000638805	study5_Casamino_acid_vs_Glu
1347	C7_02370W_A	1563.53	1.08923	0.309279	3.52185	0.000428544	0.00148902	study5_Casamino_acid_vs_Glu
1348	C6_01650C_A	4746.24	1.77468	0.246857	7.18913	6.52e-13	8.79e-12	study5_Casamino_acid_vs_Glu
1349	C4_02740W_A	8549.4	2.36783	0.520297	4.55093	5.34e-06	2.86e-05	study5_Casamino_acid_vs_Glu
1350	C2_03390C_A	11675.9	3.4187	0.817209	4.18338	2.87e-05	0.000133159	study5_Casamino_acid_vs_Glu
1351	C3_01480C_A	1772.07	1.86275	0.257838	7.22452	5.03e-13	6.87e-12	study5_Casamino_acid_vs_Glu
1352	C2_03210W_A	614.01	1.28361	0.258643	4.96284	6.95e-07	4.4e-06	study5_Casamino_acid_vs_Glu
1353	C4_03430W_A	1799.97	1.77179	0.354796	4.99383	5.92e-07	3.79e-06	study5_Casamino_acid_vs_Glu
1354	C2_03310C_A	1522.48	1.46488	0.25264	5.79828	6.7e-09	5.83e-08	study5_Casamino_acid_vs_Glu
1355	C2_09880C_A	3968.23	2.19541	0.551448	3.98117	6.86e-05	0.000290795	study5_Casamino_acid_vs_Glu
1356	C3_07120W_A	874.191	1.98094	0.25593	7.74016	9.93e-15	1.6e-13	study5_Casamino_acid_vs_Glu
1357	C1_02170C_A	2412.62	1.19734	0.330331	3.62467	0.00028933	0.00105284	study5_Casamino_acid_vs_Glu
1358	C1_02590C_A	18987.7	1.68859	0.310489	5.43848	5.37e-08	4.03e-07	study5_Casamino_acid_vs_Glu
1359	C1_04950C_A	3470.58	1.47419	0.257646	5.72175	1.05e-08	8.87e-08	study5_Casamino_acid_vs_Glu
1360	C5_02690W_A	1886.7	1.42879	0.239512	5.96543	2.44e-09	2.2e-08	study5_Casamino_acid_vs_Glu
1361	CR_07700W_A	1220.68	2.12055	0.270618	7.83596	4.65e-15	7.74e-14	study5_Casamino_acid_vs_Glu
1362	C3_03720W_A	4523.81	1.37514	0.210068	6.54618	5.9e-11	6.61e-10	study5_Casamino_acid_vs_Glu
1363	C3_07640C_A	7642.49	2.57614	0.261929	9.83525	7.94e-23	2.51e-21	study5_Casamino_acid_vs_Glu
1364	C5_01130W_A	749.342	1.12133	0.362619	3.09231	0.00198609	0.00582302	study5_Casamino_acid_vs_Glu
1365	C1_10190W_A	1376.09	1.15721	0.145252	7.96692	1.63e-15	2.85e-14	study5_Casamino_acid_vs_Glu
1366	C2_06690C_A	1880.06	2.22206	0.345455	6.43227	1.26e-10	1.35e-09	study5_Casamino_acid_vs_Glu
1367	C1_05200C_A	1519.26	1.53252	0.276169	5.54923	2.87e-08	2.24e-07	study5_Casamino_acid_vs_Glu
1368	C1_08930C_A	1323.97	1.86876	0.179858	10.3902	2.75e-25	1.01e-23	study5_Casamino_acid_vs_Glu
1369	C1_13190W_A	5543.52	1.43621	0.38599	3.72084	0.000198564	0.000751003	study5_Casamino_acid_vs_Glu
1370	C1_06860W_A	146.655	1.97728	0.520432	3.7993	0.000145107	0.000568744	study5_Casamino_acid_vs_Glu
1371	CR_09460C_A	5888.77	2.32487	0.249849	9.3051	1.34e-20	3.49e-19	study5_Casamino_acid_vs_Glu
1372	C6_04200C_A	1193.98	2.09197	0.359154	5.82473	5.72e-09	5e-08	study5_Casamino_acid_vs_Glu
1373	C3_06660C_A	32.1819	2.255	0.530728	4.24887	2.15e-05	0.000102943	study5_Casamino_acid_vs_Glu
1374	C1_11670W_A	13320.8	2.57059	0.376142	6.83409	8.25e-12	1.01e-10	study5_Casamino_acid_vs_Glu
1375	C6_00480C_A	3983.71	2.3652	0.462175	5.11754	3.1e-07	2.06e-06	study5_Casamino_acid_vs_Glu
1376	C3_03740W_A	536.743	1.05497	0.231814	4.55095	5.34e-06	2.86e-05	study5_Casamino_acid_vs_Glu
1377	C4_01160W_A	715.692	4.81206	0.458802	10.4883	9.78e-26	3.72e-24	study5_Casamino_acid_vs_Glu
1378	C1_04500W_A	11218.9	4.1654	0.469632	8.86949	7.35e-19	1.71e-17	study5_Casamino_acid_vs_Glu
1379	CR_08270W_A	111.49	4.69779	1.2894	3.6434	0.000269057	0.000986651	study5_Casamino_acid_vs_Glu
1380	C2_01590W_A	15689.5	1.41106	0.233853	6.03393	1.6e-09	1.48e-08	study5_Casamino_acid_vs_Glu
1381	CR_06140W_A	4738.38	1.04887	0.208182	5.03825	4.7e-07	3.05e-06	study5_Casamino_acid_vs_Glu
1382	C2_00760C_A	3193.19	1.75679	0.385339	4.55909	5.14e-06	2.77e-05	study5_Casamino_acid_vs_Glu
1383	C6_01250W_A	263.735	1.05923	0.339802	3.11721	0.00182572	0.00541731	study5_Casamino_acid_vs_Glu
1384	C4_01860C_A	808.897	1.44847	0.274411	5.27846	1.3e-07	9.26e-07	study5_Casamino_acid_vs_Glu
1385	C1_10740C_A	4888.43	2.17304	0.479286	4.53392	5.79e-06	3.07e-05	study5_Casamino_acid_vs_Glu
1386	C2_05750W_A	1380.35	1.36533	0.380702	3.58635	0.000335342	0.00120391	study5_Casamino_acid_vs_Glu
1387	C7_02040C_A	24426.4	2.04289	0.220058	9.2834	1.64e-20	4.26e-19	study5_Casamino_acid_vs_Glu
1388	C1_14220C_A	676.349	2.43806	0.273787	8.90493	5.34e-19	1.26e-17	study5_Casamino_acid_vs_Glu
1389	C1_02320C_A	5595.94	1.8812	0.24857	7.56811	3.79e-14	5.74e-13	study5_Casamino_acid_vs_Glu
1390	C2_06700W_A	1394.74	1.63231	0.243146	6.71332	1.9e-11	2.23e-10	study5_Casamino_acid_vs_Glu
1391	C5_04280C_A	3879.26	1.34434	0.227022	5.92162	3.19e-09	2.84e-08	study5_Casamino_acid_vs_Glu
1392	C4_03810W_A	1014.86	1.23036	0.199206	6.17632	6.56e-10	6.45e-09	study5_Casamino_acid_vs_Glu
1393	C4_03320W_A	1672.49	1.20184	0.207684	5.78686	7.17e-09	6.2e-08	study5_Casamino_acid_vs_Glu
1394	C1_11850W_A	5555.06	2.97442	0.30646	9.70574	2.85e-22	8.4e-21	study5_Casamino_acid_vs_Glu
1395	CR_09180W_A	1174.45	3.24439	0.304053	10.6705	1.4e-26	5.67e-25	study5_Casamino_acid_vs_Glu
1396	C3_01970C_A	33.2874	2.57921	0.565333	4.56229	5.06e-06	2.73e-05	study5_Casamino_acid_vs_Glu
1397	C1_10160W_A	5958.32	1.27641	0.308418	4.13857	3.49e-05	0.000157985	study5_Casamino_acid_vs_Glu
1398	CR_02020C_A	1248.86	1.014	0.349825	2.89859	0.00374844	0.0102483	study5_Casamino_acid_vs_Glu
1399	C1_01840C_A	1881.9	2.39392	0.33472	7.15201	8.55e-13	1.13e-11	study5_Casamino_acid_vs_Glu
1400	CR_09070C_A	6711	1.41177	0.225679	6.25564	3.96e-10	4e-09	study5_Casamino_acid_vs_Glu
1401	C4_02390W_A	49372.5	1.62599	0.282421	5.75734	8.54e-09	7.31e-08	study5_Casamino_acid_vs_Glu
1402	C5_04440C_A	2788.5	4.37615	0.305537	14.3228	1.58e-46	1.33e-44	study5_Casamino_acid_vs_Glu
1403	CR_00790C_A	15.4957	1.8119	0.651412	2.7815	0.00541081	0.0141703	study5_Casamino_acid_vs_Glu
1404	C1_09690W_A	18480	4.4096	0.292414	15.08	2.19e-51	2.14e-49	study5_Casamino_acid_vs_Glu
1405	C4_04050C_A	4358.97	1.13827	0.406569	2.79969	0.00511516	0.0135052	study5_Casamino_acid_vs_Glu
1406	C1_04330W_A	9714.7	1.13544	0.358414	3.16797	0.00153508	0.00464675	study5_Casamino_acid_vs_Glu
1407	C2_02130C_A	29.9459	1.38393	0.574108	2.41058	0.0159272	0.036293	study5_Casamino_acid_vs_Glu
1408	C4_06430C_A	886.291	1.09207	0.232908	4.68884	2.75e-06	1.57e-05	study5_Casamino_acid_vs_Glu
1409	C2_09800C_A	222.746	3.91452	0.66853	5.85541	4.76e-09	4.17e-08	study5_Casamino_acid_vs_Glu
1410	CR_07250C_A	1310.94	3.21767	0.199469	16.1311	1.54e-58	1.98e-56	study5_Casamino_acid_vs_Glu
1411	C3_00930W_A	3433.3	1.80811	0.294178	6.14633	7.93e-10	7.68e-09	study5_Casamino_acid_vs_Glu
1412	CR_00780C_A	16467.3	1.07623	0.300948	3.57614	0.000348706	0.00124535	study5_Casamino_acid_vs_Glu
1413	C2_09240C_A	485.358	1.62784	0.202388	8.04316	8.76e-16	1.59e-14	study5_Casamino_acid_vs_Glu
1414	C1_02070W_A	433.9	7.40858	0.472961	15.6642	2.66e-55	2.92e-53	study5_Casamino_acid_vs_Glu
1415	CR_04150W_A	243.449	2.18046	0.29005	7.51752	5.58e-14	8.34e-13	study5_Casamino_acid_vs_Glu
1416	C1_13610C_A	3099.57	1.22491	0.259016	4.72909	2.26e-06	1.31e-05	study5_Casamino_acid_vs_Glu
1417	C2_02610C_A	322.579	1.26882	0.452228	2.80571	0.00502065	0.0132898	study5_Casamino_acid_vs_Glu
1418	C5_01820W_A	8822.71	1.33631	0.43632	3.06269	0.00219357	0.00636466	study5_Casamino_acid_vs_Glu
1419	C1_13430C_A	595.302	1.30014	0.375434	3.46302	0.000534152	0.001816	study5_Casamino_acid_vs_Glu
1420	C6_02200C_A	792.957	1.9593	0.208979	9.3756	6.88e-21	1.84e-19	study5_Casamino_acid_vs_Glu
1421	C2_01150W_A	2153.99	2.10816	0.17938	11.7525	6.86e-32	3.55e-30	study5_Casamino_acid_vs_Glu
1422	C1_13680C_A	11745.1	1.95095	0.217974	8.95036	3.54e-19	8.49e-18	study5_Casamino_acid_vs_Glu
1423	C2_03640W_A	1434.39	2.46925	0.185022	13.3457	1.25e-40	8.98e-39	study5_Casamino_acid_vs_Glu
1424	C3_03700C_A	30.2272	1.63866	0.686134	2.38825	0.016929	0.0382964	study5_Casamino_acid_vs_Glu
1425	C1_12260W_A	641.175	1.12805	0.272736	4.13606	3.53e-05	0.000159487	study5_Casamino_acid_vs_Glu
1426	C6_02320C_A	1644.66	1.51332	0.266324	5.68225	1.33e-08	1.09e-07	study5_Casamino_acid_vs_Glu
1427	CR_00200W_A	99391.4	8.06801	0.357322	22.5791	6.96e-113	4.28e-110	study5_Casamino_acid_vs_Glu
1428	C1_13350W_A	15379.7	2.14162	0.201731	10.6162	2.51e-26	9.89e-25	study5_Casamino_acid_vs_Glu
1429	C4_02300W_A	2761.84	1.10248	0.214136	5.14851	2.63e-07	1.77e-06	study5_Casamino_acid_vs_Glu
1430	C2_08260W_A	1204.09	7.32614	0.691484	10.5948	3.15e-26	1.23e-24	study5_Casamino_acid_vs_Glu
1431	C2_07890W_A	3193.59	1.18794	0.194617	6.10401	1.03e-09	9.84e-09	study5_Casamino_acid_vs_Glu
1432	CR_05480W_A	7416.16	1.4077	0.162254	8.67591	4.1e-18	9.05e-17	study5_Casamino_acid_vs_Glu
1433	C5_04380C_A	61.4615	5.16465	0.64355	8.02525	1.01e-15	1.82e-14	study5_Casamino_acid_vs_Glu
1434	C1_13270W_A	2671.35	1.38279	0.182162	7.591	3.17e-14	4.85e-13	study5_Casamino_acid_vs_Glu
1435	C7_02290W_A	128.096	1.46018	0.353632	4.12909	3.64e-05	0.000163914	study5_Casamino_acid_vs_Glu
1436	CR_09590W_A	2831.87	1.07684	0.260879	4.12774	3.66e-05	0.000164762	study5_Casamino_acid_vs_Glu
1437	CR_07810W_A	1019.49	1.6645	0.363832	4.57491	4.76e-06	2.58e-05	study5_Casamino_acid_vs_Glu
1438	CR_02800C_A	823.659	1.0576	0.310281	3.40851	0.000653178	0.0021762	study5_Casamino_acid_vs_Glu
1439	C4_04330C_A	4340.67	1.1006	0.262897	4.18644	2.83e-05	0.000131774	study5_Casamino_acid_vs_Glu
1440	C3_06580W_A	9208.26	9.9547	0.376597	26.4333	5.68e-154	7e-151	study5_Casamino_acid_vs_Glu
1441	CR_01160W_A	26.518	1.84833	0.577198	3.20225	0.00136358	0.00418939	study5_Casamino_acid_vs_Glu
1442	C1_01240W_A	1861.76	3.9412	0.24504	16.0839	3.31e-58	4.07e-56	study5_Casamino_acid_vs_Glu
1443	C6_00600C_A	6288.61	1.41294	0.255677	5.52627	3.27e-08	2.53e-07	study5_Casamino_acid_vs_Glu
1444	CR_05170C_A	9285.34	5.47211	0.221097	24.7498	3.11e-135	2.74e-132	study5_Casamino_acid_vs_Glu
1445	C1_04060W_A	366.698	1.22869	0.259553	4.73386	2.2e-06	1.28e-05	study5_Casamino_acid_vs_Glu
1446	C3_00200C_A	5663.25	1.17397	0.169397	6.93033	4.2e-12	5.28e-11	study5_Casamino_acid_vs_Glu
1447	C5_01360W_A	138.063	1.33944	0.536691	2.49574	0.0125694	0.0295946	study5_Casamino_acid_vs_Glu
1448	C5_00590W_A	28138.7	1.76494	0.27193	6.49041	8.56e-11	9.41e-10	study5_Casamino_acid_vs_Glu
1449	C1_13440C_A	70.3954	3.55783	0.59498	5.97975	2.23e-09	2.02e-08	study5_Casamino_acid_vs_Glu
1450	C2_02230C_A	3866.09	6.86081	0.447263	15.3395	4.16e-53	4.27e-51	study5_Casamino_acid_vs_Glu
1451	C1_05910W_A	3415.76	1.48756	0.284105	5.23594	1.64e-07	1.14e-06	study5_Casamino_acid_vs_Glu
1452	C5_04460C_A	14.392	2.08399	0.755164	2.75965	0.0057863	0.0149879	study5_Casamino_acid_vs_Glu
1453	C4_05110C_A	6308.83	2.82274	0.287999	9.80118	1.11e-22	3.46e-21	study5_Casamino_acid_vs_Glu
1454	C1_02110C_A	12935.7	3.9952	0.412774	9.67889	3.71e-22	1.09e-20	study5_Casamino_acid_vs_Glu
1455	C3_01130C_A	6480.78	3.59244	0.373852	9.60925	7.31e-22	2.08e-20	study5_Casamino_acid_vs_Glu
1456	C2_10170C_A	2775.57	1.53383	0.201741	7.60297	2.89e-14	4.45e-13	study5_Casamino_acid_vs_Glu
1457	C2_07540W_A	2474.23	1.57013	0.227886	6.89001	5.58e-12	6.93e-11	study5_Casamino_acid_vs_Glu
1458	C1_01010W_A	3957.28	1.05545	0.1702	6.20124	5.6e-10	5.58e-09	study5_Casamino_acid_vs_Glu
1459	C4_00330C_A	4152.88	1.06089	0.204055	5.19904	2e-07	1.38e-06	study5_Casamino_acid_vs_Glu
1460	C1_07660W_A	265.102	1.29128	0.365114	3.53663	0.000405265	0.00142016	study5_Casamino_acid_vs_Glu
1461	C1_06350W_A	2582.04	1.87057	0.263407	7.10143	1.23e-12	1.63e-11	study5_Casamino_acid_vs_Glu
1462	C3_00880W_A	15322.7	2.50875	0.268304	9.35041	8.73e-21	2.3e-19	study5_Casamino_acid_vs_Glu
1463	C2_09070C_A	6301.94	1.71339	0.258479	6.62876	3.39e-11	3.87e-10	study5_Casamino_acid_vs_Glu
1464	C1_09120W_A	1282	2.44538	0.244484	10.0022	1.49e-23	4.91e-22	study5_Casamino_acid_vs_Glu
1465	C4_03540C_A	1327.16	2.76008	0.250834	11.0036	3.67e-28	1.63e-26	study5_Casamino_acid_vs_Glu
1466	C7_03450C_A	3379.14	1.69093	0.296664	5.69984	1.2e-08	9.9e-08	study5_Casamino_acid_vs_Glu
1467	C2_03050W_A	1148.79	1.08064	0.175938	6.14218	8.14e-10	7.84e-09	study5_Casamino_acid_vs_Glu
1468	CR_05540C_A	1104.76	1.06889	0.299503	3.56887	0.000358531	0.00127526	study5_Casamino_acid_vs_Glu
1469	C1_11690W_A	2703.06	1.95876	0.288672	6.78542	1.16e-11	1.4e-10	study5_Casamino_acid_vs_Glu
1470	C2_04590C_A	5639.86	1.38957	0.224915	6.17822	6.48e-10	6.39e-09	study5_Casamino_acid_vs_Glu
1471	C2_02060C_A	590.084	4.06149	0.325796	12.4664	1.14e-35	6.87e-34	study5_Casamino_acid_vs_Glu
1472	C7_03360W_A	10178	1.0461	0.213338	4.9035	9.41e-07	5.81e-06	study5_Casamino_acid_vs_Glu
1473	C4_02890C_A	4895.89	1.55531	0.170131	9.14186	6.14e-20	1.52e-18	study5_Casamino_acid_vs_Glu
1474	C2_00420W_A	1980.61	1.58114	0.161832	9.77027	1.51e-22	4.63e-21	study5_Casamino_acid_vs_Glu
1475	CR_03250C_A	6187.41	2.38296	0.298745	7.97657	1.5e-15	2.68e-14	study5_Casamino_acid_vs_Glu
1476	C1_06050C_A	1096.9	1.38944	0.243107	5.71536	1.09e-08	9.16e-08	study5_Casamino_acid_vs_Glu
1477	C4_00080C_A	1855.96	2.73709	0.242262	11.298	1.34e-29	6.36e-28	study5_Casamino_acid_vs_Glu
1478	CR_07790C_A	24964	3.14891	0.392809	8.0164	1.09e-15	1.95e-14	study5_Casamino_acid_vs_Glu
1479	C2_01650W_A	296.569	1.18467	0.244359	4.84807	1.25e-06	7.58e-06	study5_Casamino_acid_vs_Glu
1480	C2_03290W_A	1507.04	1.90486	0.190562	9.996	1.59e-23	5.17e-22	study5_Casamino_acid_vs_Glu
1481	C1_00410C_A	3131.92	1.97857	0.225936	8.75722	2e-18	4.51e-17	study5_Casamino_acid_vs_Glu
1482	C2_04290W_A	353.977	2.41937	0.247741	9.76572	1.58e-22	4.81e-21	study5_Casamino_acid_vs_Glu
1483	C2_01200C_A	13808.5	1.54975	0.249255	6.21751	5.05e-10	5.08e-09	study5_Casamino_acid_vs_Glu
1484	C4_02920W_A	2573.03	1.17668	0.245449	4.79399	1.63e-06	9.74e-06	study5_Casamino_acid_vs_Glu
1485	C1_07640C_A	1384.15	1.21975	0.340683	3.58033	0.000343166	0.00122913	study5_Casamino_acid_vs_Glu
1486	C1_10240C_A	899.413	3.32531	0.303703	10.9492	6.7e-28	2.93e-26	study5_Casamino_acid_vs_Glu
1487	C3_03490W_A	3272.72	2.21011	0.41598	5.31302	1.08e-07	7.79e-07	study5_Casamino_acid_vs_Glu
1488	C5_02600W_A	8027.34	4.11648	0.274325	15.0059	6.72e-51	6.46e-49	study5_Casamino_acid_vs_Glu
1489	C5_01790C_A	91.6554	1.14714	0.377056	3.04236	0.0023473	0.0067314	study5_Casamino_acid_vs_Glu
1490	CR_07370W_A	1708.98	1.59356	0.16205	9.83376	8.06e-23	2.53e-21	study5_Casamino_acid_vs_Glu
1491	C5_04940W_A	244.102	2.65006	0.41774	6.3438	2.24e-10	2.36e-09	study5_Casamino_acid_vs_Glu
1492	C7_03310W_A	4222.78	3.50552	0.558267	6.27928	3.4e-10	3.48e-09	study5_Casamino_acid_vs_Glu
1493	C3_07790W_A	1173.35	1.29979	0.232767	5.5841	2.35e-08	1.86e-07	study5_Casamino_acid_vs_Glu
1494	CR_04870C_A	1111.63	2.41592	0.333444	7.24534	4.31e-13	5.95e-12	study5_Casamino_acid_vs_Glu
1495	C3_02480C_A	18462.8	1.91392	0.296307	6.45925	1.05e-10	1.14e-09	study5_Casamino_acid_vs_Glu
1496	C2_03350W_A	1679.35	6.44426	0.423692	15.2098	3.05e-52	3.07e-50	study5_Casamino_acid_vs_Glu
1497	C7_03480W_A	3715.22	1.02961	0.290276	3.54701	0.000389628	0.00137482	study5_Casamino_acid_vs_Glu
1498	C1_09780C_A	2110.77	1.68187	0.195736	8.59255	8.51e-18	1.82e-16	study5_Casamino_acid_vs_Glu
1499	C7_03780C_A	1209.35	1.49237	0.24034	6.20943	5.32e-10	5.32e-09	study5_Casamino_acid_vs_Glu
1500	C7_03340C_A	672.931	3.63324	0.200734	18.0998	3.2e-73	6.79e-71	study5_Casamino_acid_vs_Glu
1501	C1_08050W_A	4367.21	1.62526	0.231237	7.02853	2.09e-12	2.7e-11	study5_Casamino_acid_vs_Glu
1502	CR_07130C_A	544.323	3.5044	0.411605	8.51399	1.68e-17	3.47e-16	study5_Casamino_acid_vs_Glu
1503	CR_07910C_A	2094.45	1.18083	0.165762	7.12368	1.05e-12	1.39e-11	study5_Casamino_acid_vs_Glu
1504	C2_09750W_A	9115.31	1.42111	0.27323	5.20115	1.98e-07	1.37e-06	study5_Casamino_acid_vs_Glu
1505	C5_03980W_A	2127.82	1.03877	0.162561	6.39004	1.66e-10	1.76e-09	study5_Casamino_acid_vs_Glu
1506	C1_00390W_A	7743.07	2.23358	0.360674	6.19278	5.91e-10	5.87e-09	study5_Casamino_acid_vs_Glu
1507	C6_02740W_A	2979.3	1.72999	0.209355	8.26341	1.42e-16	2.74e-15	study5_Casamino_acid_vs_Glu
1508	C1_09620C_A	1132.68	1.03842	0.272768	3.80699	0.000140671	0.00055378	study5_Casamino_acid_vs_Glu
1509	C3_01610W_A	10012.7	2.00466	0.225364	8.89522	5.83e-19	1.36e-17	study5_Casamino_acid_vs_Glu
1510	CR_10160W_A	17754.8	1.45099	0.21616	6.71256	1.91e-11	2.24e-10	study5_Casamino_acid_vs_Glu
1511	C6_00150W_A	17169.9	2.64782	0.311787	8.49238	2.02e-17	4.13e-16	study5_Casamino_acid_vs_Glu
1512	C4_03700W_A	1322.27	1.1871	0.216604	5.48051	4.24e-08	3.23e-07	study5_Casamino_acid_vs_Glu
1513	C5_03960W_A	3217.3	1.2728	0.203343	6.25938	3.87e-10	3.91e-09	study5_Casamino_acid_vs_Glu
1514	CR_09550C_A	2413.24	1.88824	0.198404	9.51712	1.78e-21	4.96e-20	study5_Casamino_acid_vs_Glu
1515	C2_08120W_A	4077.47	2.02822	0.274635	7.38513	1.52e-13	2.18e-12	study5_Casamino_acid_vs_Glu
1516	C4_06780C_A	1509.53	1.20064	0.287313	4.17884	2.93e-05	0.000135335	study5_Casamino_acid_vs_Glu
1517	C4_02620C_A	10108.4	1.46808	0.254654	5.76497	8.17e-09	7.02e-08	study5_Casamino_acid_vs_Glu
1518	CR_08160W_A	2777.89	1.79172	0.234903	7.62749	2.39e-14	3.72e-13	study5_Casamino_acid_vs_Glu
1519	C3_01230C_A	110.856	1.24249	0.372156	3.33863	0.000841915	0.00273558	study5_Casamino_acid_vs_Glu
1520	C1_07970C_A	2878.27	1.06789	0.225157	4.74288	2.11e-06	1.23e-05	study5_Casamino_acid_vs_Glu
1521	C3_01410C_A	2679.89	1.97061	0.264513	7.44997	9.34e-14	1.36e-12	study5_Casamino_acid_vs_Glu
1522	C4_03890W_A	7664.9	1.14503	0.331079	3.45847	0.000543245	0.00184386	study5_Casamino_acid_vs_Glu
1523	C6_01500C_A	3828.28	6.47934	0.375325	17.2633	8.89e-67	1.56e-64	study5_Casamino_acid_vs_Glu
1524	C1_07220W_A	13102.1	6.03599	0.410825	14.6923	7.22e-49	6.35e-47	study5_Casamino_acid_vs_Glu
1525	C3_04070C_A	7749.06	3.37373	0.315049	10.7086	9.28e-27	3.78e-25	study5_Casamino_acid_vs_Glu
1526	C2_08890W_A	12.2808	2.18246	0.77673	2.80981	0.00495708	0.0131539	study5_Casamino_acid_vs_Glu
1527	C6_03240W_A	752.199	3.73921	0.329905	11.3342	8.88e-30	4.24e-28	study5_Casamino_acid_vs_Glu
1528	C2_04940C_A	5536.41	3.19784	0.412235	7.75732	8.67e-15	1.41e-13	study5_Casamino_acid_vs_Glu
1529	C5_04690C_A	174.913	3.49986	0.410487	8.52612	1.51e-17	3.14e-16	study5_Casamino_acid_vs_Glu
1530	C3_05130C_A	69.4439	1.52149	0.383518	3.96718	7.27e-05	0.000305447	study5_Casamino_acid_vs_Glu
1531	C2_00930C_A	1320.37	1.82097	0.215488	8.45045	2.9e-17	5.88e-16	study5_Casamino_acid_vs_Glu
1532	C2_08820C_A	74.588	1.20143	0.508425	2.36304	0.0181255	0.0406701	study5_Casamino_acid_vs_Glu
1533	C2_09220W_A	8729.9	1.33582	0.376605	3.547	0.000389649	0.00137482	study5_Casamino_acid_vs_Glu
1534	C3_05060W_A	840.688	1.60987	0.172286	9.34417	9.26e-21	2.43e-19	study5_Casamino_acid_vs_Glu
1535	C2_08400C_A	26.6675	1.34267	0.512949	2.61755	0.00885626	0.0218112	study5_Casamino_acid_vs_Glu
1536	C1_03320C_A	2961.65	2.65779	0.289587	9.17786	4.4e-20	1.12e-18	study5_Casamino_acid_vs_Glu
1537	C1_01780C_A	1437.49	1.94702	0.295153	6.59664	4.21e-11	4.79e-10	study5_Casamino_acid_vs_Glu
1538	C4_01140C_A	930.418	1.06115	0.306973	3.45681	0.000546617	0.00185326	study5_Casamino_acid_vs_Glu
1539	C2_04970W_A	700.632	1.20978	0.36126	3.34879	0.000811647	0.00264969	study5_Casamino_acid_vs_Glu
1540	C7_01160C_A	2239.55	1.02267	0.184629	5.53908	3.04e-08	2.36e-07	study5_Casamino_acid_vs_Glu
1541	C7_02230W_A	163.863	4.44119	0.423933	10.4762	1.11e-25	4.2e-24	study5_Casamino_acid_vs_Glu
1542	C3_07310C_A	29029.3	1.41188	0.213982	6.59811	4.16e-11	4.75e-10	study5_Casamino_acid_vs_Glu
1543	C2_00610C_A	2820.6	1.37147	0.175435	7.81758	5.38e-15	8.92e-14	study5_Casamino_acid_vs_Glu
1544	CR_07170W_A	586.094	1.1621	0.27808	4.17901	2.93e-05	0.000135334	study5_Casamino_acid_vs_Glu
1545	C2_05500W_A	16022.9	1.19633	0.183253	6.52826	6.65e-11	7.41e-10	study5_Casamino_acid_vs_Glu
1546	C2_00240C_A	1053.74	1.95304	0.405964	4.81085	1.5e-06	9.03e-06	study5_Casamino_acid_vs_Glu
1547	C3_01140W_A	871.983	1.19284	0.198396	6.01243	1.83e-09	1.68e-08	study5_Casamino_acid_vs_Glu
1548	CR_04820W_A	1847.11	3.15263	0.555837	5.67185	1.41e-08	1.16e-07	study5_Casamino_acid_vs_Glu
1549	C3_07200C_A	1238.16	1.36362	0.219676	6.20741	5.39e-10	5.38e-09	study5_Casamino_acid_vs_Glu
1550	C5_02080C_A	963.482	2.0698	0.34806	5.94666	2.74e-09	2.45e-08	study5_Casamino_acid_vs_Glu
1551	C2_04740C_A	255.816	1.45845	0.236479	6.16735	6.94e-10	6.81e-09	study5_Casamino_acid_vs_Glu
1552	C4_02210W_A	123.489	3.12807	0.455009	6.87473	6.21e-12	7.68e-11	study5_Casamino_acid_vs_Glu
1553	C2_08170W_A	334.631	2.71782	0.348293	7.80326	6.03e-15	9.96e-14	study5_Casamino_acid_vs_Glu
1554	C6_00980C_A	1334.09	1.26758	0.24455	5.18331	2.18e-07	1.49e-06	study5_Casamino_acid_vs_Glu
1555	C6_04310W_A	2280.97	3.1269	0.229054	13.6514	1.98e-42	1.51e-40	study5_Casamino_acid_vs_Glu
1556	C3_02790W_A	383.31	3.57881	0.405639	8.82264	1.12e-18	2.57e-17	study5_Casamino_acid_vs_Glu
1557	C1_10370W_A	11.3355	1.85064	0.699718	2.64483	0.00817308	0.0203402	study5_Casamino_acid_vs_Glu
1558	C1_12580W_A	1599.4	1.58816	0.202435	7.84527	4.32e-15	7.23e-14	study5_Casamino_acid_vs_Glu
1559	C1_06550W_A	9070.68	2.20174	0.382502	5.75615	8.61e-09	7.35e-08	study5_Casamino_acid_vs_Glu
1560	C1_07170C_A	1628.92	1.93667	0.243739	7.94566	1.93e-15	3.34e-14	study5_Casamino_acid_vs_Glu
1561	C2_04280W_A	1160.53	3.46154	0.233012	14.8556	6.4e-50	5.79e-48	study5_Casamino_acid_vs_Glu
1562	C3_00220W_A	3277.23	3.69944	0.387678	9.54256	1.39e-21	3.92e-20	study5_Casamino_acid_vs_Glu
1563	C2_08920W_A	2975.43	2.15879	0.297082	7.26666	3.68e-13	5.1e-12	study5_Casamino_acid_vs_Glu
1564	C1_09240C_A	592.055	1.60882	0.434549	3.70227	0.000213679	0.000802208	study5_Casamino_acid_vs_Glu
1565	C1_13630W_A	4880.58	5.44346	0.301876	18.0321	1.09e-72	2.17e-70	study5_Casamino_acid_vs_Glu
1566	C1_11310C_A	6802.42	1.43753	0.181619	7.91508	2.47e-15	4.23e-14	study5_Casamino_acid_vs_Glu
1567	CR_05460W_A	997.581	1.02386	0.189888	5.39189	6.97e-08	5.15e-07	study5_Casamino_acid_vs_Glu
1568	CR_05030W_A	2940.77	1.31061	0.161255	8.12758	4.38e-16	8.17e-15	study5_Casamino_acid_vs_Glu
1569	C7_03490W_A	3799.68	1.88144	0.22822	8.24399	1.67e-16	3.19e-15	study5_Casamino_acid_vs_Glu
1570	C3_04940W_A	2120.48	1.50987	0.147732	10.2203	1.61e-24	5.76e-23	study5_Casamino_acid_vs_Glu
1571	C4_04030W_A	31364.8	9.58759	0.232525	41.2325	0	0	study5_Casamino_acid_vs_Glu
1572	C6_02330W_A	15572.1	1.04347	0.199085	5.24132	1.59e-07	1.12e-06	study5_Casamino_acid_vs_Glu
1573	CR_02220C_A	1191.13	2.10778	0.386699	5.4507	5.02e-08	3.78e-07	study5_Casamino_acid_vs_Glu
1574	C2_07640W_A	3884.68	1.03792	0.26359	3.93761	8.23e-05	0.000341213	study5_Casamino_acid_vs_Glu
1575	C4_05120C_A	10.9583	3.07793	0.86709	3.54972	0.000385637	0.00136379	study5_Casamino_acid_vs_Glu
1576	C5_04930C_A	2346.51	6.47418	0.366677	17.6564	9.09e-70	1.7e-67	study5_Casamino_acid_vs_Glu
1577	C6_03880W_A	709.059	1.93711	0.287033	6.74875	1.49e-11	1.77e-10	study5_Casamino_acid_vs_Glu
1578	C1_09150W_A	534.242	1.44223	0.398025	3.62346	0.00029069	0.00105611	study5_Casamino_acid_vs_Glu
1579	CR_00600C_A	3001.67	1.67521	0.172574	9.70723	2.81e-22	8.31e-21	study5_Casamino_acid_vs_Glu
1580	C4_04160W_A	20669.6	1.08753	0.313682	3.46698	0.000526336	0.00179339	study5_Casamino_acid_vs_Glu
1581	CR_08830W_A	4555.36	1.4138	0.441588	3.20163	0.00136651	0.00419629	study5_Casamino_acid_vs_Glu
1582	CR_07270C_A	644.009	2.08749	0.244603	8.53419	1.41e-17	2.94e-16	study5_Casamino_acid_vs_Glu
1583	C1_08080C_A	5006.87	2.28263	0.201019	11.3553	6.98e-30	3.36e-28	study5_Casamino_acid_vs_Glu
1584	C3_01640C_A	49.2113	1.18312	0.46146	2.56386	0.0103514	0.0250308	study5_Casamino_acid_vs_Glu
1585	C4_05670W_A	8038.69	1.03976	0.139869	7.43381	1.06e-13	1.53e-12	study5_Casamino_acid_vs_Glu
1586	C1_09320C_A	3393.08	1.17929	0.153224	7.6965	1.4e-14	2.23e-13	study5_Casamino_acid_vs_Glu
1587	C1_11890W_A	1741.68	2.31245	0.195351	11.8374	2.5e-32	1.3e-30	study5_Casamino_acid_vs_Glu
1588	C2_04950C_A	12274.4	1.65139	0.230532	7.1634	7.87e-13	1.05e-11	study5_Casamino_acid_vs_Glu
1589	C5_01490C_A	1328.44	1.29843	0.227062	5.71841	1.08e-08	9.03e-08	study5_Casamino_acid_vs_Glu
1590	C5_05360C_A	1638.64	1.19579	0.259538	4.60738	4.08e-06	2.25e-05	study5_Casamino_acid_vs_Glu
1591	C4_05580C_A	1190.2	8.39229	1.0531	7.96913	1.6e-15	2.8e-14	study5_Casamino_acid_vs_Glu
1592	CR_02390W_A	5068.79	1.039	0.170264	6.10229	1.05e-09	9.94e-09	study5_Casamino_acid_vs_Glu
1593	C4_06730C_A	4444.89	1.21548	0.197507	6.15413	7.55e-10	7.37e-09	study5_Casamino_acid_vs_Glu
1594	C2_03760C_A	7374.07	1.65115	0.171813	9.61013	7.25e-22	2.08e-20	study5_Casamino_acid_vs_Glu
1595	C3_04910C_A	9453.03	1.64203	0.297302	5.52311	3.33e-08	2.57e-07	study5_Casamino_acid_vs_Glu
1596	CR_06860C_A	12007.1	4.59484	0.244846	18.7662	1.43e-78	3.51e-76	study5_Casamino_acid_vs_Glu
1597	CR_03500W_A	13963.3	4.17531	0.4	10.4383	1.66e-25	6.22e-24	study5_Casamino_acid_vs_Glu
1598	C2_02980C_A	4417.13	2.25769	0.244352	9.23949	2.48e-20	6.41e-19	study5_Casamino_acid_vs_Glu
1599	CR_02510W_A	6805.91	2.24503	0.239017	9.39279	5.84e-21	1.58e-19	study5_Casamino_acid_vs_Glu
1600	C2_05370C_A	1658.26	1.07125	0.195762	5.4722	4.44e-08	3.37e-07	study5_Casamino_acid_vs_Glu
1601	C4_02490W_A	1367.95	1.21131	0.171058	7.08128	1.43e-12	1.88e-11	study5_Casamino_acid_vs_Glu
1602	C1_07160C_A	21206.5	4.10923	1.2454	3.29953	0.000968471	0.00308638	study5_Casamino_acid_vs_Glu
1603	C3_01960C_A	8069.84	3.00626	0.201585	14.9131	2.71e-50	2.57e-48	study5_Casamino_acid_vs_Glu
1604	C4_01170C_A	140.812	3.42921	0.398021	8.61565	6.95e-18	1.51e-16	study5_Casamino_acid_vs_Glu
1605	C6_00920W_A	3550.66	1.93189	0.242918	7.95284	1.82e-15	3.17e-14	study5_Casamino_acid_vs_Glu
1606	C2_07160W_A	5368.37	1.20486	0.218084	5.52474	3.3e-08	2.55e-07	study5_Casamino_acid_vs_Glu
1607	C4_02240C_A	9.71423	2.76061	1.07255	2.57388	0.0100564	0.0244159	study5_Casamino_acid_vs_Glu
1608	C2_06600W_A	13007.7	2.90769	0.231889	12.5392	4.56e-36	2.83e-34	study5_Casamino_acid_vs_Glu
1609	C7_03740C_A	109.733	5.33988	0.567741	9.40549	5.18e-21	1.41e-19	study5_Casamino_acid_vs_Glu
1610	C1_08850C_A	593.715	1.16887	0.174741	6.68916	2.24e-11	2.61e-10	study5_Casamino_acid_vs_Glu
1611	C3_02720W_A	924.345	2.02	0.223994	9.01811	1.91e-19	4.6e-18	study5_Casamino_acid_vs_Glu
1612	C1_02530C_A	12726	4.18899	0.281231	14.8952	3.54e-50	3.26e-48	study5_Casamino_acid_vs_Glu
1613	C1_11630C_A	54.1345	2.39395	0.393013	6.09128	1.12e-09	1.06e-08	study5_Casamino_acid_vs_Glu
1614	C3_04000C_A	7585.76	6.54778	0.38498	17.0081	7.15e-65	1.19e-62	study5_Casamino_acid_vs_Glu
1615	C2_06510W_A	1220.71	1.18373	0.192991	6.13361	8.59e-10	8.26e-09	study5_Casamino_acid_vs_Glu
1616	C1_05140W_A	7898.93	1.62816	0.482989	3.371	0.000748948	0.00246988	study5_Casamino_acid_vs_Glu
1617	C4_02930W_A	4777.78	8.4949	0.403391	21.0587	1.9e-98	7.81e-96	study5_Casamino_acid_vs_Glu
1618	C3_03480C_A	3804.92	1.38224	0.290538	4.75752	1.96e-06	1.15e-05	study5_Casamino_acid_vs_Glu
1619	C2_04010C_A	7738.99	3.44093	1.23271	2.79137	0.00524857	0.0138159	study5_Casamino_acid_vs_Glu
1620	C4_02230C_A	203.595	5.21283	0.535959	9.72618	2.33e-22	6.94e-21	study5_Casamino_acid_vs_Glu
1621	CR_00330C_A	3422.21	3.6205	0.215451	16.8043	2.27e-63	3.62e-61	study5_Casamino_acid_vs_Glu
1622	C6_02660C_A	182.38	1.60512	0.329203	4.87578	1.08e-06	6.62e-06	study5_Casamino_acid_vs_Glu
1623	C4_01070W_A	53529	10.4862	0.263218	39.8385	0	0	study5_Casamino_acid_vs_Glu
1624	C1_09770W_A	580.866	1.76437	0.204077	8.64562	5.35e-18	1.17e-16	study5_Casamino_acid_vs_Glu
1625	C3_02540C_A	1128.04	1.3313	0.233028	5.71303	1.11e-08	9.25e-08	study5_Casamino_acid_vs_Glu
1626	C1_08040W_A	410.296	1.01547	0.281534	3.60691	0.000309864	0.00111765	study5_Casamino_acid_vs_Glu
1627	C3_06730W_A	616.318	1.38407	0.22301	6.20632	5.42e-10	5.41e-09	study5_Casamino_acid_vs_Glu
1628	C6_02510C_A	29.2052	7.69406	1.48796	5.17088	2.33e-07	1.58e-06	study5_Casamino_acid_vs_Glu
1629	C5_04880C_A	3807.81	2.15112	0.260557	8.25586	1.51e-16	2.9e-15	study5_Casamino_acid_vs_Glu
1630	C6_00810C_A	67.8296	2.32449	0.515751	4.50699	6.58e-06	3.45e-05	study5_Casamino_acid_vs_Glu
1631	C5_04190W_A	120.363	1.10617	0.473086	2.3382	0.019377	0.0431379	study5_Casamino_acid_vs_Glu
1632	C5_04080C_A	1238.98	1.23302	0.188058	6.55658	5.51e-11	6.2e-10	study5_Casamino_acid_vs_Glu
1633	C3_06570C_A	1476.34	1.09096	0.210557	5.18129	2.2e-07	1.5e-06	study5_Casamino_acid_vs_Glu
1634	C2_01960C_A	186.799	1.14813	0.346394	3.31453	0.000917973	0.00294987	study5_Casamino_acid_vs_Glu
1635	C1_01130W_A	4965.26	1.04948	0.287075	3.65576	0.00025642	0.000945942	study5_Casamino_acid_vs_Glu
1636	CR_08210C_A	30583.6	4.16593	0.348571	11.9515	6.38e-33	3.45e-31	study5_Casamino_acid_vs_Glu
1637	C7_00350C_A	24592.3	3.95166	0.905772	4.36275	1.28e-05	6.37e-05	study5_Casamino_acid_vs_Glu
1638	CR_00530W_A	162.917	4.24886	0.494054	8.59999	7.97e-18	1.71e-16	study5_Casamino_acid_vs_Glu
1639	C7_00290C_A	430.578	4.25085	0.398501	10.6671	1.45e-26	5.84e-25	study5_Casamino_acid_vs_Glu
1640	C3_05620W_A	45.8402	1.48079	0.531997	2.78346	0.00537824	0.014115	study5_Casamino_acid_vs_Glu
1641	C4_00240C_A	1558.06	1.96012	0.164026	11.9501	6.49e-33	3.47e-31	study5_Casamino_acid_vs_Glu
1642	C2_01660C_A	2026.96	1.47747	0.258529	5.71491	1.1e-08	9.17e-08	study5_Casamino_acid_vs_Glu
1643	CR_02620C_A	3148.62	1.78561	0.20974	8.51347	1.69e-17	3.48e-16	study5_Casamino_acid_vs_Glu
1644	CR_02240C_A	164.262	2.22391	0.441629	5.03569	4.76e-07	3.08e-06	study5_Casamino_acid_vs_Glu
1645	C1_07870C_A	13353.5	1.51291	0.261273	5.79052	7.02e-09	6.09e-08	study5_Casamino_acid_vs_Glu
1646	C4_03470C_A	1512.14	5.81973	1.42372	4.08768	4.36e-05	0.000192305	study5_Casamino_acid_vs_Glu
1647	C2_01700C_A	1708.62	1.1213	0.198862	5.63858	1.71e-08	1.38e-07	study5_Casamino_acid_vs_Glu
1648	CR_02490W_A	1888.74	4.22746	0.88416	4.78133	1.74e-06	1.03e-05	study5_Casamino_acid_vs_Glu
1649	C1_12850W_A	18250.2	4.52141	0.50816	8.89761	5.71e-19	1.34e-17	study5_Casamino_acid_vs_Glu
1650	C4_05870C_A	35.3358	5.14257	1.10161	4.66824	3.04e-06	1.72e-05	study5_Casamino_acid_vs_Glu
1651	C1_00780C_A	504.835	1.83024	0.346231	5.28617	1.25e-07	8.93e-07	study5_Casamino_acid_vs_Glu
1652	C2_04550C_A	7200.16	2.87548	0.282797	10.168	2.76e-24	9.64e-23	study5_Casamino_acid_vs_Glu
1653	C1_02210W_A	6231.96	1.33958	0.295226	4.53747	5.69e-06	3.02e-05	study5_Casamino_acid_vs_Glu
1654	C2_05360C_A	452.869	1.19388	0.338601	3.52592	0.00042202	0.00147217	study5_Casamino_acid_vs_Glu
1655	C2_04080W_A	4354.05	1.2282	0.305544	4.01971	5.83e-05	0.000249839	study5_Casamino_acid_vs_Glu
1656	CR_08920W_A	2280.75	3.23631	0.287139	11.2709	1.83e-29	8.52e-28	study5_Casamino_acid_vs_Glu
1657	C4_00150C_A	3840.7	1.4211	0.179128	7.93345	2.13e-15	3.67e-14	study5_Casamino_acid_vs_Glu
1658	C1_02700C_A	2670.21	1.96289	0.374149	5.24627	1.55e-07	1.09e-06	study5_Casamino_acid_vs_Glu
1659	C5_01800C_A	3529.2	1.03887	0.316375	3.28366	0.00102468	0.00324201	study5_Casamino_acid_vs_Glu
1660	CR_05680C_A	372.985	1.31655	0.322365	4.08403	4.43e-05	0.000195214	study5_Casamino_acid_vs_Glu
1661	C3_01090W_A	1490.97	2.06865	0.262206	7.88941	3.04e-15	5.14e-14	study5_Casamino_acid_vs_Glu
1662	C7_00660W_A	7043.35	1.87946	0.350841	5.35703	8.46e-08	6.19e-07	study5_Casamino_acid_vs_Glu
1663	C1_02250W_A	2398.16	1.47501	0.219239	6.72785	1.72e-11	2.03e-10	study5_Casamino_acid_vs_Glu
1664	C4_04020C_A	3809.74	10.0258	0.6223	16.1108	2.14e-58	2.69e-56	study5_Casamino_acid_vs_Glu
1665	C4_02020W_A	6339.08	3.1613	0.179339	17.6275	1.51e-69	2.74e-67	study5_Casamino_acid_vs_Glu
1666	C1_07580C_A	288.544	2.82902	0.468536	6.038	1.56e-09	1.45e-08	study5_Casamino_acid_vs_Glu
1667	C6_03400C_A	8856.76	1.57513	0.203218	7.75092	9.12e-15	1.48e-13	study5_Casamino_acid_vs_Glu
1668	C5_02680W_A	799.61	1.33515	0.25103	5.31871	1.05e-07	7.58e-07	study5_Casamino_acid_vs_Glu
1669	C1_07420C_A	1158.31	1.53157	0.157091	9.74956	1.85e-22	5.59e-21	study5_Casamino_acid_vs_Glu
1670	C4_04540C_A	33.0727	2.0657	0.495793	4.16647	3.09e-05	0.000142037	study5_Casamino_acid_vs_Glu
1671	C4_02500C_A	2537.59	2.6628	0.31996	8.32229	8.63e-17	1.7e-15	study5_Casamino_acid_vs_Glu
1672	CR_07820W_A	171.26	1.28613	0.278632	4.61586	3.91e-06	2.17e-05	study5_Casamino_acid_vs_Glu
1673	C3_03990C_A	360.26	1.62699	0.303853	5.35452	8.58e-08	6.26e-07	study5_Casamino_acid_vs_Glu
1674	C2_01010W_A	10021.3	1.13275	0.349749	3.23875	0.00120055	0.00373323	study5_Casamino_acid_vs_Glu
1675	C1_08770W_A	1409.98	1.09201	0.226252	4.8265	1.39e-06	8.4e-06	study5_Casamino_acid_vs_Glu
1676	CR_08540C_A	2545.89	1.54349	0.200455	7.69991	1.36e-14	2.18e-13	study5_Casamino_acid_vs_Glu
1677	C4_02150C_A	366.125	1.33267	0.278297	4.78866	1.68e-06	9.99e-06	study5_Casamino_acid_vs_Glu
1678	C2_06730W_A	13621.6	1.12202	0.228304	4.91459	8.9e-07	5.53e-06	study5_Casamino_acid_vs_Glu
1679	CR_08690C_A	2217.73	2.39806	0.245413	9.77152	1.49e-22	4.59e-21	study5_Casamino_acid_vs_Glu
1680	C4_05700W_A	718.935	5.63335	0.359353	15.6764	2.19e-55	2.46e-53	study5_Casamino_acid_vs_Glu
1681	C1_09580C_A	134.132	1.05901	0.426343	2.48393	0.0129942	0.0304823	study5_Casamino_acid_vs_Glu
1682	C2_03790C_A	8093.11	1.5426	0.328117	4.70136	2.58e-06	1.49e-05	study5_Casamino_acid_vs_Glu
1683	C1_01220C_A	3229.27	2.75993	0.395741	6.97408	3.08e-12	3.9e-11	study5_Casamino_acid_vs_Glu
1684	C1_13840W_A	2855.13	1.38443	0.2138	6.47536	9.46e-11	1.03e-09	study5_Casamino_acid_vs_Glu
1685	CR_02070C_A	26534.8	2.25583	0.536814	4.20225	2.64e-05	0.000123829	study5_Casamino_acid_vs_Glu
1686	C1_08580C_A	1305.03	1.7635	0.173924	10.1395	3.69e-24	1.28e-22	study5_Casamino_acid_vs_Glu
1687	C2_04480W_A	2903.88	1.65712	0.292132	5.67251	1.41e-08	1.15e-07	study5_Casamino_acid_vs_Glu
1688	CR_04930W_A	3623.16	1.63818	0.185533	8.82956	1.05e-18	2.42e-17	study5_Casamino_acid_vs_Glu
1689	CR_00150C_A	4462.07	2.6222	0.187788	13.9636	2.6e-44	2.08e-42	study5_Casamino_acid_vs_Glu
1690	C1_03720C_A	2058.02	1.11777	0.211612	5.28219	1.28e-07	9.1e-07	study5_Casamino_acid_vs_Glu
1691	C1_04610W_A	41073.9	1.44652	0.221352	6.53495	6.36e-11	7.1e-10	study5_Casamino_acid_vs_Glu
1692	CR_09270C_A	6734.54	1.198	0.227808	5.25883	1.45e-07	1.02e-06	study5_Casamino_acid_vs_Glu
1693	C1_08370W_A	14137.4	2.69991	0.346998	7.78076	7.21e-15	1.18e-13	study5_Casamino_acid_vs_Glu
1694	C1_12100C_A	1446.26	2.6424	0.204743	12.906	4.17e-38	2.73e-36	study5_Casamino_acid_vs_Glu
1695	C2_03140C_A	3239.33	1.05737	0.282985	3.73647	0.000186624	0.000709288	study5_Casamino_acid_vs_Glu
1696	C3_00810C_A	9362.76	3.93672	0.246437	15.9746	1.92e-57	2.27e-55	study5_Casamino_acid_vs_Glu
1697	CR_09920W_A	4261.07	6.31436	0.48604	12.9914	1.37e-38	9.26e-37	study5_Casamino_acid_vs_Glu
1698	C4_00110C_A	1971.23	1.07738	0.260795	4.13113	3.61e-05	0.000162708	study5_Casamino_acid_vs_Glu
1699	CR_09530C_A	5428.85	1.37671	0.301721	4.56288	5.05e-06	2.72e-05	study5_Casamino_acid_vs_Glu
1700	C7_03930C_A	4591.33	1.1731	0.214789	5.46164	4.72e-08	3.56e-07	study5_Casamino_acid_vs_Glu
1701	C3_03440C_A	567.414	1.72508	0.314381	5.48723	4.08e-08	3.12e-07	study5_Casamino_acid_vs_Glu
1702	C5_04560C_A	21381.5	1.85899	0.249356	7.45516	8.98e-14	1.32e-12	study5_Casamino_acid_vs_Glu
1703	C1_07080W_A	1526.68	1.75008	0.342639	5.10766	3.26e-07	2.17e-06	study5_Casamino_acid_vs_Glu
1704	C5_02220C_A	921.057	1.81196	0.238457	7.5987	2.99e-14	4.59e-13	study5_Casamino_acid_vs_Glu
1705	C3_02290W_A	975.152	1.31309	0.264991	4.95522	7.22e-07	4.56e-06	study5_Casamino_acid_vs_Glu
1706	CR_01470W_A	18796.6	2.31837	0.246716	9.39695	5.62e-21	1.5e-19	study5_Glutamate_vs_Glu
1707	CR_01630C_A	329.238	1.33259	0.474807	2.8066	0.00500678	0.0128391	study5_Glutamate_vs_Glu
1708	CR_00300W_A	122.347	4.46115	0.49124	9.08141	1.07e-19	2.65e-18	study5_Glutamate_vs_Glu
1709	C1_01990W_A	81.24	1.33918	0.583892	2.29355	0.0218166	0.0463348	study5_Glutamate_vs_Glu
1710	C2_05160C_A	1783.95	1.57475	0.350847	4.48841	7.18e-06	3.65e-05	study5_Glutamate_vs_Glu
1711	C2_09120C_A	90.6746	2.07278	0.364376	5.68857	1.28e-08	1.04e-07	study5_Glutamate_vs_Glu
1712	CR_07920W_A	4485.91	1.80023	0.23685	7.60073	2.94e-14	4.7e-13	study5_Glutamate_vs_Glu
1713	C4_06380W_A	28.3916	2.52592	0.622112	4.06023	4.9e-05	0.000208599	study5_Glutamate_vs_Glu
1714	CR_00610W_A	704.35	1.56027	0.252058	6.19012	6.01e-10	5.89e-09	study5_Glutamate_vs_Glu
1715	CR_08870W_A	2570.77	1.4248	0.164407	8.6663	4.46e-18	9.75e-17	study5_Glutamate_vs_Glu
1716	CR_00930W_A	3865.76	9.31692	0.600435	15.517	2.66e-54	2.88e-52	study5_Glutamate_vs_Glu
1717	C5_00540C_A	722.277	11.7279	1.50121	7.81225	5.62e-15	9.32e-14	study5_Glutamate_vs_Glu
1718	CR_10140W_A	8547.83	2.23179	0.240067	9.29653	1.45e-20	3.75e-19	study5_Glutamate_vs_Glu
1719	C2_10280C_A	9776.81	1.30203	0.20947	6.21581	5.11e-10	5.05e-09	study5_Glutamate_vs_Glu
1720	CR_09570W_A	845.507	1.03659	0.269481	3.84662	0.000119758	0.000465794	study5_Glutamate_vs_Glu
1721	C1_05000W_A	1370.66	1.45653	0.337882	4.31077	1.63e-05	7.65e-05	study5_Glutamate_vs_Glu
1722	CR_06660W_A	3591.47	1.51665	0.343176	4.41946	9.89e-06	4.87e-05	study5_Glutamate_vs_Glu
1723	C1_03940W_A	7444.33	1.62591	0.208556	7.79601	6.39e-15	1.05e-13	study5_Glutamate_vs_Glu
1724	CR_05730C_A	3867.2	1.19547	0.365629	3.26961	0.00107694	0.00330876	study5_Glutamate_vs_Glu
1725	C1_01440C_A	150.87	3.72832	0.352437	10.5787	3.74e-26	1.36e-24	study5_Glutamate_vs_Glu
1726	C3_05040C_A	1435.3	1.32526	0.270714	4.89541	9.81e-07	5.99e-06	study5_Glutamate_vs_Glu
1727	C1_07980C_A	1688.98	2.13892	0.401572	5.32636	1e-07	7.12e-07	study5_Glutamate_vs_Glu
1728	C7_04180W_A	2588.97	2.81779	0.226441	12.4438	1.51e-35	8.46e-34	study5_Glutamate_vs_Glu
1729	C1_05060W_A	1286.55	1.29509	0.397979	3.25416	0.00113729	0.0034682	study5_Glutamate_vs_Glu
1730	C1_05080W_A	225.714	2.86159	0.37676	7.59524	3.07e-14	4.88e-13	study5_Glutamate_vs_Glu
1731	C4_05160C_A	866.413	1.07426	0.255867	4.19851	2.69e-05	0.000120926	study5_Glutamate_vs_Glu
1732	C2_01750C_A	5478.19	1.13617	0.271093	4.19107	2.78e-05	0.000124413	study5_Glutamate_vs_Glu
1733	C2_01890W_A	1458.17	1.17921	0.354429	3.32707	0.000877632	0.00276531	study5_Glutamate_vs_Glu
1734	C3_07760C_A	393.12	2.7719	0.264113	10.4951	9.1e-26	3.29e-24	study5_Glutamate_vs_Glu
1735	C7_01130C_A	190.376	2.5558	0.385135	6.63612	3.22e-11	3.71e-10	study5_Glutamate_vs_Glu
1736	C7_01510W_A	6052.83	2.52272	0.376023	6.70894	1.96e-11	2.29e-10	study5_Glutamate_vs_Glu
1737	CR_01300W_A	2549.76	1.41725	0.241858	5.85985	4.63e-09	3.97e-08	study5_Glutamate_vs_Glu
1738	C5_00640C_A	2158.73	1.23258	0.21191	5.81651	6.01e-09	5.09e-08	study5_Glutamate_vs_Glu
1739	C2_02600C_A	186.904	3.37492	0.311613	10.8305	2.47e-27	9.87e-26	study5_Glutamate_vs_Glu
1740	C3_03470W_A	312.603	1.38425	0.206699	6.69697	2.13e-11	2.48e-10	study5_Glutamate_vs_Glu
1741	CR_06100C_A	84.8057	1.05958	0.338795	3.1275	0.00176301	0.00513444	study5_Glutamate_vs_Glu
1742	C3_07070C_A	2112.74	4.10984	0.325982	12.6076	1.92e-36	1.11e-34	study5_Glutamate_vs_Glu
1743	C2_02540W_A	2570.66	1.06151	0.42318	2.50842	0.0121272	0.0278714	study5_Glutamate_vs_Glu
1744	C3_03710W_A	1070.08	2.24557	0.262444	8.55637	1.16e-17	2.46e-16	study5_Glutamate_vs_Glu
1745	C3_04080W_A	9066.42	1.21005	0.242804	4.98364	6.24e-07	3.96e-06	study5_Glutamate_vs_Glu
1746	C1_04460C_A	1242.07	3.19221	0.352305	9.06092	1.29e-19	3.16e-18	study5_Glutamate_vs_Glu
1747	C1_12570C_A	1767.96	1.64513	0.177975	9.24357	2.38e-20	6.07e-19	study5_Glutamate_vs_Glu
1748	C2_06710W_A	464.786	1.46179	0.230202	6.35005	2.15e-10	2.25e-09	study5_Glutamate_vs_Glu
1749	C1_02270C_A	2295.02	3.87924	0.206559	18.7803	1.09e-78	2.5e-76	study5_Glutamate_vs_Glu
1750	C5_01260W_A	186.804	2.51662	0.40184	6.26275	3.78e-10	3.81e-09	study5_Glutamate_vs_Glu
1751	C1_10030W_A	1520.51	1.3096	0.379403	3.45174	0.000556994	0.00184179	study5_Glutamate_vs_Glu
1752	C1_03470C_A	20.0875	1.61516	0.663632	2.43382	0.0149404	0.0332808	study5_Glutamate_vs_Glu
1753	CR_01860W_A	56.5299	1.98143	0.442902	4.47374	7.69e-06	3.87e-05	study5_Glutamate_vs_Glu
1754	C2_05250C_A	18756.6	1.29902	0.348006	3.73275	0.0001894	0.000702914	study5_Glutamate_vs_Glu
1755	CR_06640C_A	3558.98	1.69829	0.17445	9.73509	2.14e-22	6.48e-21	study5_Glutamate_vs_Glu
1756	C7_01550W_A	5440.76	1.21052	0.187413	6.45912	1.05e-10	1.15e-09	study5_Glutamate_vs_Glu
1757	C6_02970C_A	1114.4	1.35556	0.212905	6.36694	1.93e-10	2.04e-09	study5_Glutamate_vs_Glu
1758	C3_00980W_A	3160.32	1.26715	0.202803	6.24819	4.15e-10	4.13e-09	study5_Glutamate_vs_Glu
1759	C1_13470W_A	1065.91	1.98101	0.226449	8.74816	2.17e-18	4.87e-17	study5_Glutamate_vs_Glu
1760	C7_01750W_A	542.838	2.31415	0.251417	9.20442	3.44e-20	8.67e-19	study5_Glutamate_vs_Glu
1761	C2_08700C_A	1587.97	1.52063	0.204396	7.43966	1.01e-13	1.51e-12	study5_Glutamate_vs_Glu
1762	C1_04650W_A	24.3498	1.6203	0.509937	3.17745	0.00148575	0.00440689	study5_Glutamate_vs_Glu
1763	C2_06300W_A	743.662	1.0864	0.197287	5.50669	3.66e-08	2.76e-07	study5_Glutamate_vs_Glu
1764	C6_01720C_A	8307.91	1.62712	0.220923	7.36512	1.77e-13	2.56e-12	study5_Glutamate_vs_Glu
1765	C2_10100W_A	501.286	1.00251	0.288998	3.46893	0.000522539	0.00174095	study5_Glutamate_vs_Glu
1766	C6_00250W_A	2820.89	1.66644	0.224431	7.42517	1.13e-13	1.68e-12	study5_Glutamate_vs_Glu
1767	C2_09080C_A	4.0441	5.25959	1.79134	2.93612	0.00332347	0.00892785	study5_Glutamate_vs_Glu
1768	C1_09550W_A	145.842	1.47209	0.456664	3.22358	0.001266	0.00383223	study5_Glutamate_vs_Glu
1769	C5_02970W_A	1703.62	1.16561	0.181432	6.42451	1.32e-10	1.43e-09	study5_Glutamate_vs_Glu
1770	C5_05240C_A	44.4325	1.70077	0.477824	3.55941	0.000371682	0.00128225	study5_Glutamate_vs_Glu
1771	C4_02200C_A	595.904	1.72659	0.247251	6.98315	2.89e-12	3.75e-11	study5_Glutamate_vs_Glu
1772	C2_00480C_A	1212.6	1.2581	0.453163	2.77626	0.00549879	0.0139807	study5_Glutamate_vs_Glu
1773	C1_04360C_A	9352.98	1.3678	0.265408	5.15359	2.56e-07	1.71e-06	study5_Glutamate_vs_Glu
1774	C3_00920W_A	5518.34	10.0186	0.519538	19.2836	7.37e-83	1.97e-80	study5_Glutamate_vs_Glu
1775	C3_07290W_A	2435.68	1.17275	0.245261	4.78165	1.74e-06	1e-05	study5_Glutamate_vs_Glu
1776	C2_08340C_A	103.781	3.48303	0.469656	7.41613	1.21e-13	1.78e-12	study5_Glutamate_vs_Glu
1777	C5_03330C_A	1465.31	1.49016	0.161213	9.24342	2.39e-20	6.07e-19	study5_Glutamate_vs_Glu
1778	C5_02290W_A	392.34	1.01963	0.292918	3.48093	0.000499673	0.00166928	study5_Glutamate_vs_Glu
1779	C5_04230W_A	5.36088	4.87543	1.72358	2.82866	0.00467434	0.0120772	study5_Glutamate_vs_Glu
1780	C4_07140W_A	1023.68	1.23855	0.258363	4.79382	1.64e-06	9.49e-06	study5_Glutamate_vs_Glu
1781	C1_10140C_A	1694.79	2.40124	0.297449	8.07277	6.87e-16	1.25e-14	study5_Glutamate_vs_Glu
1782	C1_13250W_A	1761.9	1.94428	0.243274	7.99217	1.33e-15	2.34e-14	study5_Glutamate_vs_Glu
1783	C3_03870C_A	3711.65	2.05058	0.256894	7.98219	1.44e-15	2.51e-14	study5_Glutamate_vs_Glu
1784	C4_00130W_A	35511.8	1.64159	0.305348	5.37615	7.61e-08	5.49e-07	study5_Glutamate_vs_Glu
1785	C2_00140W_A	3172.67	1.63297	0.210624	7.75299	8.98e-15	1.47e-13	study5_Glutamate_vs_Glu
1786	CR_07280W_A	169.948	1.30088	0.33593	3.87248	0.000107734	0.000424389	study5_Glutamate_vs_Glu
1787	C3_04900W_A	2084.57	1.51132	0.355516	4.25105	2.13e-05	9.75e-05	study5_Glutamate_vs_Glu
1788	C4_06540W_A	4646.94	3.56446	0.207061	17.2145	2.07e-66	3.18e-64	study5_Glutamate_vs_Glu
1789	CR_09140C_A	4902.3	3.24706	0.4008	8.10145	5.43e-16	9.98e-15	study5_Glutamate_vs_Glu
1790	C5_01560C_A	2653.02	1.29329	0.191518	6.75281	1.45e-11	1.73e-10	study5_Glutamate_vs_Glu
1791	C2_00510W_A	777.642	1.27242	0.263909	4.82145	1.43e-06	8.41e-06	study5_Glutamate_vs_Glu
1792	C1_11200W_A	14996.5	2.1382	0.337686	6.33194	2.42e-10	2.51e-09	study5_Glutamate_vs_Glu
1793	CR_02750C_A	236.288	3.3088	0.439415	7.53001	5.07e-14	7.79e-13	study5_Glutamate_vs_Glu
1794	C4_07000W_A	18.3781	1.84905	0.614661	3.00825	0.00262759	0.00723178	study5_Glutamate_vs_Glu
1795	C6_00070C_A	2640.59	3.35845	0.276718	12.1367	6.75e-34	3.55e-32	study5_Glutamate_vs_Glu
1796	C7_01900W_A	6322.28	1.70159	0.233302	7.29352	3.02e-13	4.25e-12	study5_Glutamate_vs_Glu
1797	C2_06070W_A	2691.92	2.99725	0.220705	13.5804	5.24e-42	3.79e-40	study5_Glutamate_vs_Glu
1798	C3_01930W_A	8358.94	7.98421	0.301234	26.505	8.49e-155	7.47e-152	study5_Glutamate_vs_Glu
1799	C2_00400C_A	5699.69	1.77858	0.222675	7.98731	1.38e-15	2.42e-14	study5_Glutamate_vs_Glu
1800	C2_08990C_A	1482.14	1.01463	0.214227	4.73623	2.18e-06	1.23e-05	study5_Glutamate_vs_Glu
1801	C1_10730W_A	1872.22	1.4477	0.17331	8.35327	6.64e-17	1.3e-15	study5_Glutamate_vs_Glu
1802	C4_01300W_A	10013.4	1.82152	0.24009	7.58683	3.28e-14	5.18e-13	study5_Glutamate_vs_Glu
1803	C7_01200C_A	1472.81	1.48659	0.380543	3.9065	9.36e-05	0.000374631	study5_Glutamate_vs_Glu
1804	C3_02940C_A	5132.18	1.29909	0.211871	6.13149	8.71e-10	8.4e-09	study5_Glutamate_vs_Glu
1805	C3_03460C_A	250.25	3.13364	0.374492	8.3677	5.88e-17	1.16e-15	study5_Glutamate_vs_Glu
1806	CR_10790W_A	1687.39	3.68921	0.362661	10.1726	2.63e-24	8.65e-23	study5_Glutamate_vs_Glu
1807	C1_02890C_A	746.556	1.52744	0.271325	5.62957	1.81e-08	1.44e-07	study5_Glutamate_vs_Glu
1808	C1_10050W_A	76.7952	3.1074	0.556572	5.58311	2.36e-08	1.85e-07	study5_Glutamate_vs_Glu
1809	C1_05830W_A	88.8853	4.72334	0.840693	5.61839	1.93e-08	1.53e-07	study5_Glutamate_vs_Glu
1810	C1_12160W_A	2299.65	1.40944	0.240725	5.85499	4.77e-09	4.07e-08	study5_Glutamate_vs_Glu
1811	C2_09890W_A	521.469	2.36301	0.317356	7.44593	9.63e-14	1.45e-12	study5_Glutamate_vs_Glu
1812	C3_06450W_A	1323.56	3.94173	0.248333	15.8727	9.79e-57	1.14e-54	study5_Glutamate_vs_Glu
1813	CR_06150C_A	13364.7	1.2318	0.389381	3.16349	0.00155889	0.00459459	study5_Glutamate_vs_Glu
1814	C1_13670W_A	9563.81	2.89522	0.377922	7.66089	1.85e-14	2.98e-13	study5_Glutamate_vs_Glu
1815	C1_14140C_A	4494.83	1.12423	0.158024	7.11427	1.13e-12	1.53e-11	study5_Glutamate_vs_Glu
1816	C3_01320C_A	1968.17	1.86551	0.287389	6.49124	8.51e-11	9.39e-10	study5_Glutamate_vs_Glu
1817	C3_07100C_A	1236.44	1.11504	0.205949	5.41413	6.16e-08	4.49e-07	study5_Glutamate_vs_Glu
1818	C5_05430W_A	1128.63	3.48683	0.335289	10.3995	2.49e-25	8.63e-24	study5_Glutamate_vs_Glu
1819	C2_09140C_A	7457.37	1.44602	0.357435	4.04557	5.22e-05	0.00022103	study5_Glutamate_vs_Glu
1820	C3_04930C_A	2424.34	2.10462	0.221178	9.51548	1.81e-21	5.13e-20	study5_Glutamate_vs_Glu
1821	C1_01810C_A	2184.02	1.06788	0.178475	5.98335	2.19e-09	2e-08	study5_Glutamate_vs_Glu
1822	C2_05330C_A	652.825	1.13063	0.248298	4.5535	5.28e-06	2.75e-05	study5_Glutamate_vs_Glu
1823	C3_02800W_A	15.6202	2.90315	0.787341	3.68729	0.000226656	0.000825751	study5_Glutamate_vs_Glu
1824	C4_06370C_A	454.987	1.20324	0.208244	5.77803	7.56e-09	6.33e-08	study5_Glutamate_vs_Glu
1825	C7_02170C_A	2083.95	1.17462	0.196443	5.97945	2.24e-09	2.04e-08	study5_Glutamate_vs_Glu
1826	C6_00290W_A	5963.52	1.04888	0.236371	4.43743	9.1e-06	4.52e-05	study5_Glutamate_vs_Glu
1827	C2_06610C_A	1646.07	1.00393	0.440182	2.28072	0.0225651	0.0477618	study5_Glutamate_vs_Glu
1828	C1_11260C_A	104.873	2.20425	0.451106	4.88633	1.03e-06	6.24e-06	study5_Glutamate_vs_Glu
1829	C2_08660C_A	334.354	1.7505	0.259235	6.75255	1.45e-11	1.73e-10	study5_Glutamate_vs_Glu
1830	C3_07060W_A	6800.24	1.00589	0.224803	4.47451	7.66e-06	3.86e-05	study5_Glutamate_vs_Glu
1831	C3_06320W_A	644.755	1.49856	0.182271	8.22164	2.01e-16	3.81e-15	study5_Glutamate_vs_Glu
1832	C6_02450W_A	863.413	1.98013	0.507639	3.90065	9.59e-05	0.000382799	study5_Glutamate_vs_Glu
1833	C5_04490C_A	11498	1.55212	0.260714	5.95334	2.63e-09	2.37e-08	study5_Glutamate_vs_Glu
1834	C5_01400W_A	424.229	2.30725	0.404702	5.70111	1.19e-08	9.72e-08	study5_Glutamate_vs_Glu
1835	C6_04380W_A	1203.09	1.65372	0.273038	6.05677	1.39e-09	1.31e-08	study5_Glutamate_vs_Glu
1836	CR_07420W_A	15516.4	1.89208	0.20152	9.38904	6.05e-21	1.61e-19	study5_Glutamate_vs_Glu
1837	C2_06630C_A	282.852	1.32597	0.293004	4.52545	6.03e-06	3.11e-05	study5_Glutamate_vs_Glu
1838	C4_03830W_A	1200.53	1.42032	0.405916	3.49905	0.000466922	0.00156923	study5_Glutamate_vs_Glu
1839	C4_04400C_A	649.293	6.46443	0.340186	19.0026	1.62e-80	3.84e-78	study5_Glutamate_vs_Glu
1840	C3_00850C_A	24055.3	1.85832	0.231065	8.04242	8.81e-16	1.59e-14	study5_Glutamate_vs_Glu
1841	CR_07140C_A	357.709	1.68839	0.420465	4.01552	5.93e-05	0.000247931	study5_Glutamate_vs_Glu
1842	C5_05230C_A	20595.3	1.44718	0.275247	5.25776	1.46e-07	1e-06	study5_Glutamate_vs_Glu
1843	C6_03850C_A	4760.78	2.26417	0.402033	5.6318	1.78e-08	1.42e-07	study5_Glutamate_vs_Glu
1844	CR_10170C_A	2026.81	1.53303	0.288724	5.30965	1.1e-07	7.72e-07	study5_Glutamate_vs_Glu
1845	C5_04130C_A	13949.2	1.82922	0.406925	4.49522	6.95e-06	3.54e-05	study5_Glutamate_vs_Glu
1846	C1_06810W_A	19820.9	5.11408	0.318116	16.0761	3.75e-58	4.44e-56	study5_Glutamate_vs_Glu
1847	C4_00960W_A	1651.38	2.36621	0.252178	9.38306	6.41e-21	1.69e-19	study5_Glutamate_vs_Glu
1848	C2_04670W_A	138.156	2.64918	0.414371	6.39325	1.62e-10	1.73e-09	study5_Glutamate_vs_Glu
1849	CR_08880C_A	48.6398	2.91624	0.743623	3.92167	8.79e-05	0.000354679	study5_Glutamate_vs_Glu
1850	C1_09110W_A	873.051	1.01336	0.212996	4.75765	1.96e-06	1.12e-05	study5_Glutamate_vs_Glu
1851	C1_13410W_A	1680.03	1.79284	0.158545	11.3081	1.2e-29	5.38e-28	study5_Glutamate_vs_Glu
1852	C1_11760C_A	2346.26	1.03384	0.148607	6.95684	3.48e-12	4.47e-11	study5_Glutamate_vs_Glu
1853	C1_01630W_A	3440.25	1.08149	0.306001	3.53429	0.000408879	0.00139937	study5_Glutamate_vs_Glu
1854	C6_02290C_A	1048.98	1.49576	0.398758	3.75104	0.000176099	0.000658713	study5_Glutamate_vs_Glu
1855	C6_03070C_A	200.952	1.20995	0.401405	3.01429	0.00257583	0.00710484	study5_Glutamate_vs_Glu
1856	C6_00080C_A	2269.59	2.99393	0.26771	11.1835	4.91e-29	2.13e-27	study5_Glutamate_vs_Glu
1857	C5_03130W_A	3426.37	2.08465	0.41877	4.97801	6.42e-07	4.07e-06	study5_Glutamate_vs_Glu
1858	C1_07600W_A	3944.95	1.13444	0.231705	4.89607	9.78e-07	5.98e-06	study5_Glutamate_vs_Glu
1859	C1_03150C_A	1718.07	1.53646	0.191826	8.00968	1.15e-15	2.05e-14	study5_Glutamate_vs_Glu
1860	C1_05890W_A	1583.93	9.29623	0.505138	18.4034	1.23e-75	2.53e-73	study5_Glutamate_vs_Glu
1861	C2_03710W_A	22.5725	5.11518	0.960566	5.32518	1.01e-07	7.15e-07	study5_Glutamate_vs_Glu
1862	C2_00920W_A	639.684	1.08076	0.24193	4.46724	7.92e-06	3.97e-05	study5_Glutamate_vs_Glu
1863	C7_00400W_A	4431.02	1.93183	0.229618	8.41323	3.99e-17	8.1e-16	study5_Glutamate_vs_Glu
1864	CR_00050W_A	413.861	1.41554	0.254527	5.56144	2.68e-08	2.07e-07	study5_Glutamate_vs_Glu
1865	C6_02040W_A	14108.1	1.05089	0.143176	7.33981	2.14e-13	3.08e-12	study5_Glutamate_vs_Glu
1866	CR_01200W_A	413.659	3.05826	0.270338	11.3127	1.13e-29	5.14e-28	study5_Glutamate_vs_Glu
1867	C3_02880W_A	11.8639	2.03701	0.752711	2.70623	0.00680513	0.016929	study5_Glutamate_vs_Glu
1868	C2_02430W_A	1301.64	1.37244	0.422725	3.24664	0.00116775	0.00355392	study5_Glutamate_vs_Glu
1869	C5_03730W_A	8.24446	2.27411	0.97945	2.32182	0.0202425	0.0433506	study5_Glutamate_vs_Glu
1870	C7_03280C_A	4837.32	3.55527	0.298362	11.916	9.77e-33	4.93e-31	study5_Glutamate_vs_Glu
1871	C4_02730C_A	7.19815	2.51611	1.07593	2.33854	0.0193594	0.0417646	study5_Glutamate_vs_Glu
1872	C1_01980W_A	9721.58	5.04415	0.357218	14.1207	2.83e-45	2.42e-43	study5_Glutamate_vs_Glu
1873	C6_03370W_A	28095.7	3.70399	0.26381	14.0404	8.82e-45	7.24e-43	study5_Glutamate_vs_Glu
1874	C1_05180C_A	1661.79	1.07441	0.217705	4.93516	8.01e-07	4.99e-06	study5_Glutamate_vs_Glu
1875	C2_03520C_A	23571.8	2.79912	0.20083	13.9378	3.73e-44	2.95e-42	study5_Glutamate_vs_Glu
1876	CR_08670C_A	1343.01	3.18848	0.308241	10.3441	4.45e-25	1.51e-23	study5_Glutamate_vs_Glu
1877	C3_00210C_A	392.315	2.15202	0.245194	8.77682	1.68e-18	3.82e-17	study5_Glutamate_vs_Glu
1878	C5_04370C_A	88.4887	1.35663	0.449421	3.01862	0.00253929	0.00701409	study5_Glutamate_vs_Glu
1879	CR_06670W_A	131.39	5.12415	1.00742	5.08641	3.65e-07	2.38e-06	study5_Glutamate_vs_Glu
1880	C2_08140C_A	6327.25	1.63505	0.239478	6.82753	8.64e-12	1.06e-10	study5_Glutamate_vs_Glu
1881	C3_01420C_A	3101.85	1.76883	0.234336	7.54827	4.41e-14	6.85e-13	study5_Glutamate_vs_Glu
1882	C5_03060C_A	932.244	5.31162	0.425017	12.4974	7.71e-36	4.36e-34	study5_Glutamate_vs_Glu
1883	C4_00980C_A	39.4445	2.49925	0.521108	4.79603	1.62e-06	9.43e-06	study5_Glutamate_vs_Glu
1884	C3_05630W_A	173.927	6.60004	0.615093	10.7302	7.35e-27	2.79e-25	study5_Glutamate_vs_Glu
1885	C4_00750C_A	238.164	1.19423	0.288016	4.14642	3.38e-05	0.000148629	study5_Glutamate_vs_Glu
1886	C3_00990C_A	40.1567	3.73783	0.542887	6.8851	5.77e-12	7.23e-11	study5_Glutamate_vs_Glu
1887	CR_05860W_A	1880.59	1.15324	0.161141	7.15675	8.26e-13	1.14e-11	study5_Glutamate_vs_Glu
1888	CR_08550W_A	4282.86	1.4738	0.24257	6.07577	1.23e-09	1.18e-08	study5_Glutamate_vs_Glu
1889	C1_08330C_A	18329.1	4.69577	0.245191	19.1514	9.41e-82	2.32e-79	study5_Glutamate_vs_Glu
1890	C1_02120C_A	48598.2	1.61411	0.333173	4.84467	1.27e-06	7.59e-06	study5_Glutamate_vs_Glu
1891	C1_12880C_A	1695.49	1.16023	0.285042	4.07037	4.69e-05	0.00020097	study5_Glutamate_vs_Glu
1892	C4_06610C_A	17243	2.24947	0.249743	9.00711	2.12e-19	5.05e-18	study5_Glutamate_vs_Glu
1893	C3_06000W_A	1273.45	1.37355	0.174129	7.88814	3.07e-15	5.19e-14	study5_Glutamate_vs_Glu
1894	C2_01040W_A	194.766	1.27727	0.271313	4.70774	2.5e-06	1.4e-05	study5_Glutamate_vs_Glu
1895	C5_03500W_A	6451.99	2.16846	0.297262	7.29478	2.99e-13	4.22e-12	study5_Glutamate_vs_Glu
1896	C1_13850C_A	90.0088	3.84113	0.388721	9.88147	5.01e-23	1.56e-21	study5_Glutamate_vs_Glu
1897	C5_03870C_A	2014.52	1.83906	0.195518	9.40609	5.15e-21	1.4e-19	study5_Glutamate_vs_Glu
1898	C1_11100W_A	1367.83	1.04642	0.205215	5.09913	3.41e-07	2.24e-06	study5_Glutamate_vs_Glu
1899	C4_03030C_A	1662.64	1.23228	0.363735	3.38786	0.000704406	0.00227665	study5_Glutamate_vs_Glu
1900	C1_13730C_A	358.545	1.61221	0.481457	3.3486	0.00081222	0.00257642	study5_Glutamate_vs_Glu
1901	C1_09100W_A	373.24	1.62546	0.260181	6.24745	4.17e-10	4.14e-09	study5_Glutamate_vs_Glu
1902	C1_07960W_A	424.797	1.87805	0.393052	4.77812	1.77e-06	1.02e-05	study5_Glutamate_vs_Glu
1903	C6_03600C_A	188.698	7.54451	0.634454	11.8913	1.31e-32	6.52e-31	study5_Glutamate_vs_Glu
1904	C1_13080W_A	6522.51	11.5984	0.520311	22.2912	4.5e-110	2.13e-107	study5_Glutamate_vs_Glu
1905	C3_00330W_A	2245.32	1.12356	0.275515	4.07802	4.54e-05	0.000195294	study5_Glutamate_vs_Glu
1906	C2_04120C_A	1688.56	1.47956	0.430386	3.43774	0.000586595	0.00192931	study5_Glutamate_vs_Glu
1907	C2_03500W_A	4956.51	1.08688	0.185002	5.87498	4.23e-09	3.65e-08	study5_Glutamate_vs_Glu
1908	C3_04440C_A	55.6888	1.78587	0.464087	3.84814	0.000119019	0.000463212	study5_Glutamate_vs_Glu
1909	C6_02790C_A	1224.92	1.42362	0.326959	4.35412	1.34e-05	6.42e-05	study5_Glutamate_vs_Glu
1910	CR_06590C_A	1911.43	2.61203	0.403648	6.47105	9.73e-11	1.07e-09	study5_Glutamate_vs_Glu
1911	CR_01280C_A	965.42	1.80848	0.215532	8.39079	4.83e-17	9.7e-16	study5_Glutamate_vs_Glu
1912	C1_10550C_A	715.039	2.53376	0.265837	9.53126	1.55e-21	4.46e-20	study5_Glutamate_vs_Glu
1913	C1_11320C_A	23793.7	7.69858	0.544979	14.1264	2.61e-45	2.27e-43	study5_Glutamate_vs_Glu
1914	C7_00280W_A	1253.09	9.44615	0.561957	16.8094	2.08e-63	3.13e-61	study5_Glutamate_vs_Glu
1915	C5_04960W_A	4842.91	2.82032	0.223811	12.6013	2.08e-36	1.19e-34	study5_Glutamate_vs_Glu
1916	C1_10850W_A	12.686	2.35985	0.777537	3.03503	0.00240514	0.00668854	study5_Glutamate_vs_Glu
1917	C3_03760W_A	3179.53	1.8893	0.28052	6.73498	1.64e-11	1.94e-10	study5_Glutamate_vs_Glu
1918	C5_01830C_A	802.264	1.11763	0.24733	4.51879	6.22e-06	3.2e-05	study5_Glutamate_vs_Glu
1919	C7_01680C_A	2263.19	1.84342	0.225278	8.1829	2.77e-16	5.19e-15	study5_Glutamate_vs_Glu
1920	C6_01260W_A	195.692	1.40247	0.344545	4.07049	4.69e-05	0.00020097	study5_Glutamate_vs_Glu
1921	C6_01710C_A	3179.73	1.34576	0.23866	5.63883	1.71e-08	1.37e-07	study5_Glutamate_vs_Glu
1922	CR_03440W_A	76.9227	1.71503	0.372316	4.60637	4.1e-06	2.21e-05	study5_Glutamate_vs_Glu
1923	CR_03580C_A	503.503	6.19742	0.46496	13.3289	1.57e-40	1.1e-38	study5_Glutamate_vs_Glu
1924	CR_09740W_A	1112.19	1.48072	0.314481	4.70847	2.5e-06	1.4e-05	study5_Glutamate_vs_Glu
1925	C2_06990W_A	1153.35	6.10348	0.295159	20.6786	5.39e-95	1.95e-92	study5_Glutamate_vs_Glu
[truncated: 22,764 more rows]

## Sheet: DOWN regulated
	gene	baseMean	log2FoldChange	lfcSE	stat	pvalue	padj	Study
[truncated: 18,074 more rows]
